# Supplementary material for: Global, regional, and national burden of female specific cancer and their risk factors among reproductive women from 1990 to 2021, and projections to 2050
Source: Research Square preprint supplement (doi:10.21203/rs.3.rs-7828536/v1), 2025-11-19
Supplement: Supplementary file 1 [file 640be1c5aef27f4a0d3e2f54.docx]

Global, regional, and national burden of breast, cervical, uterine, and ovarian cancer and their risk factors among reproductive women from 1990 to 2021, and projections to 2050: findings from the global burden of disease study 2021


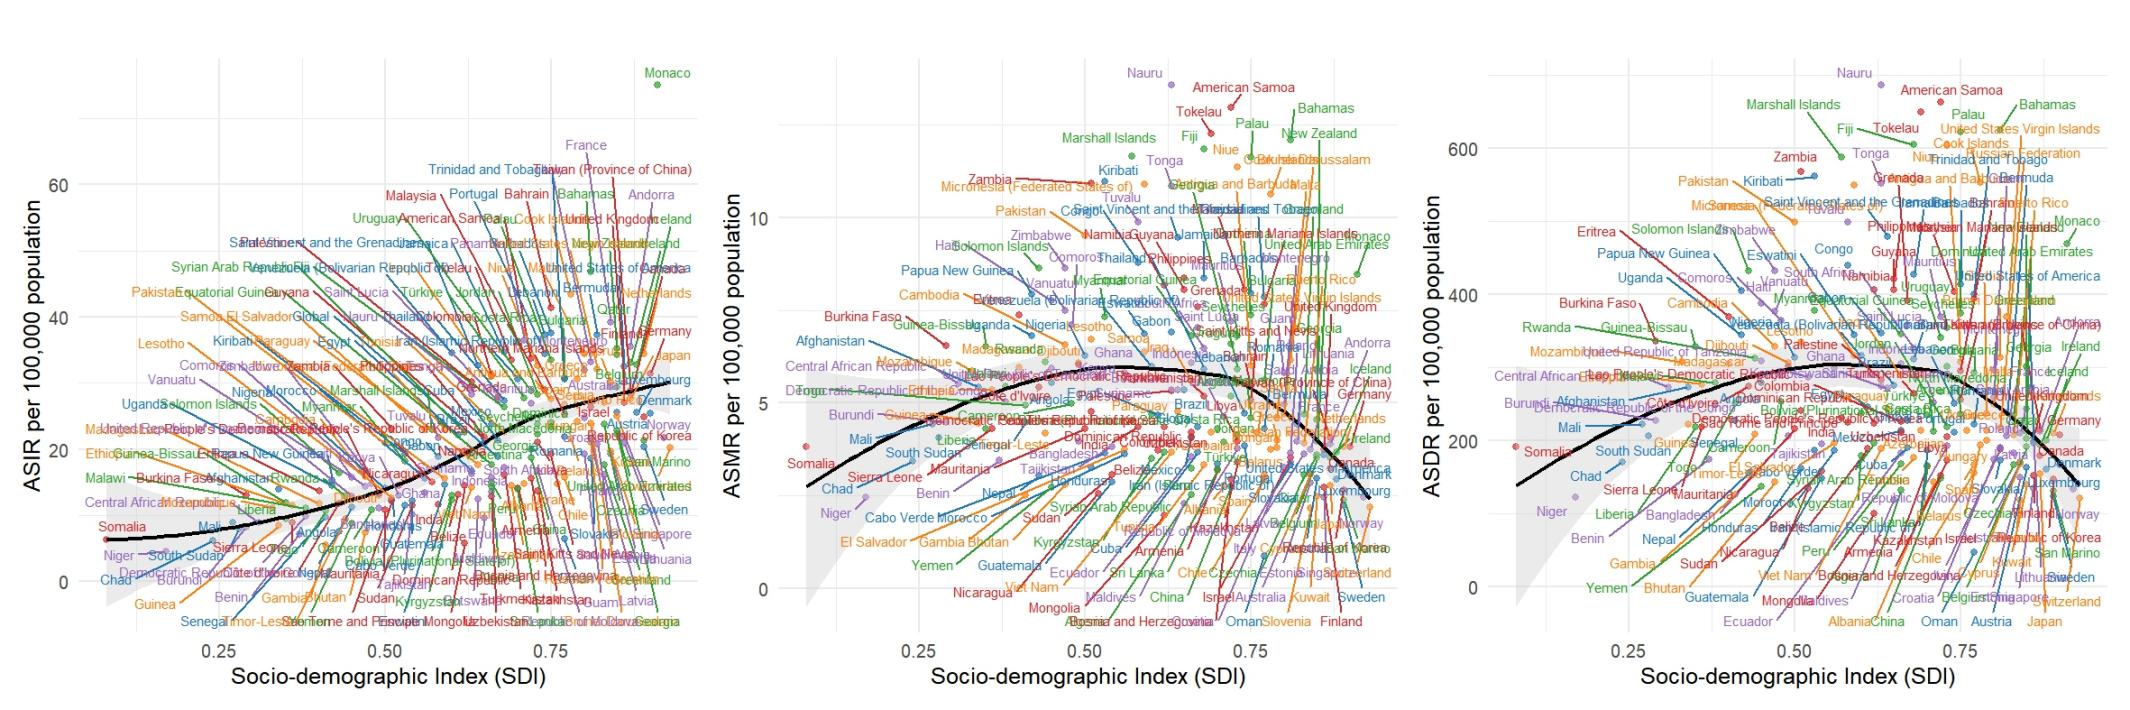


# Figure S1. Bivariate association between age-standardized rates of female breast cancer and country-level SDI in 2021.


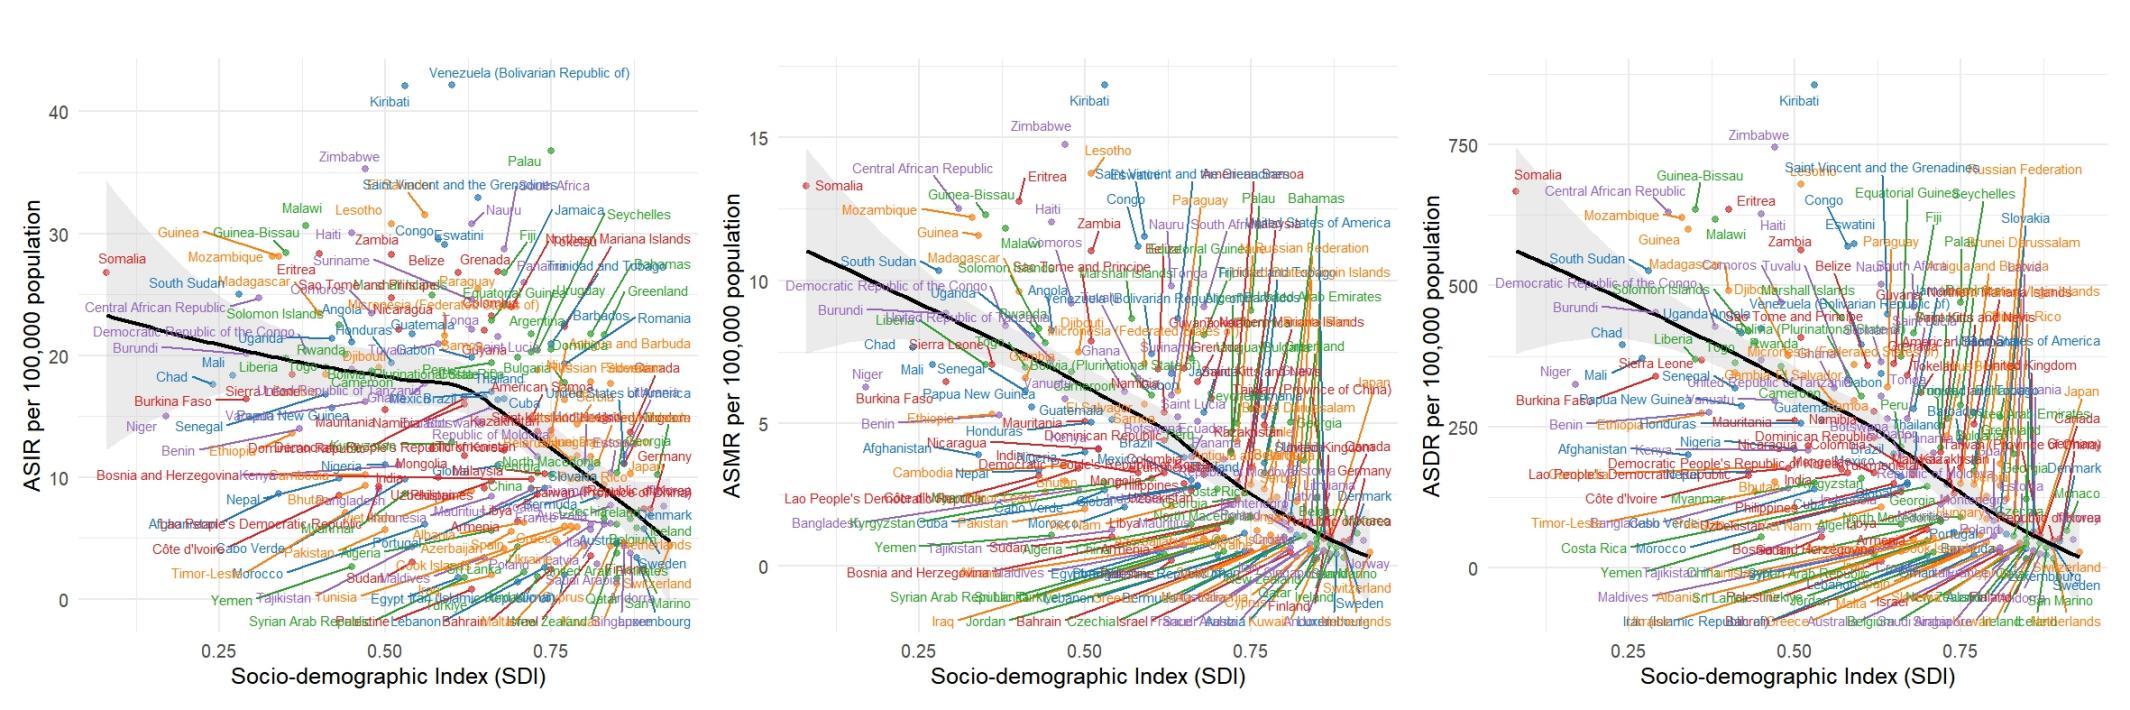


# Figure S2. Bivariate association between age-standardized rates of cervical cancer and country-level SDI in 2021.


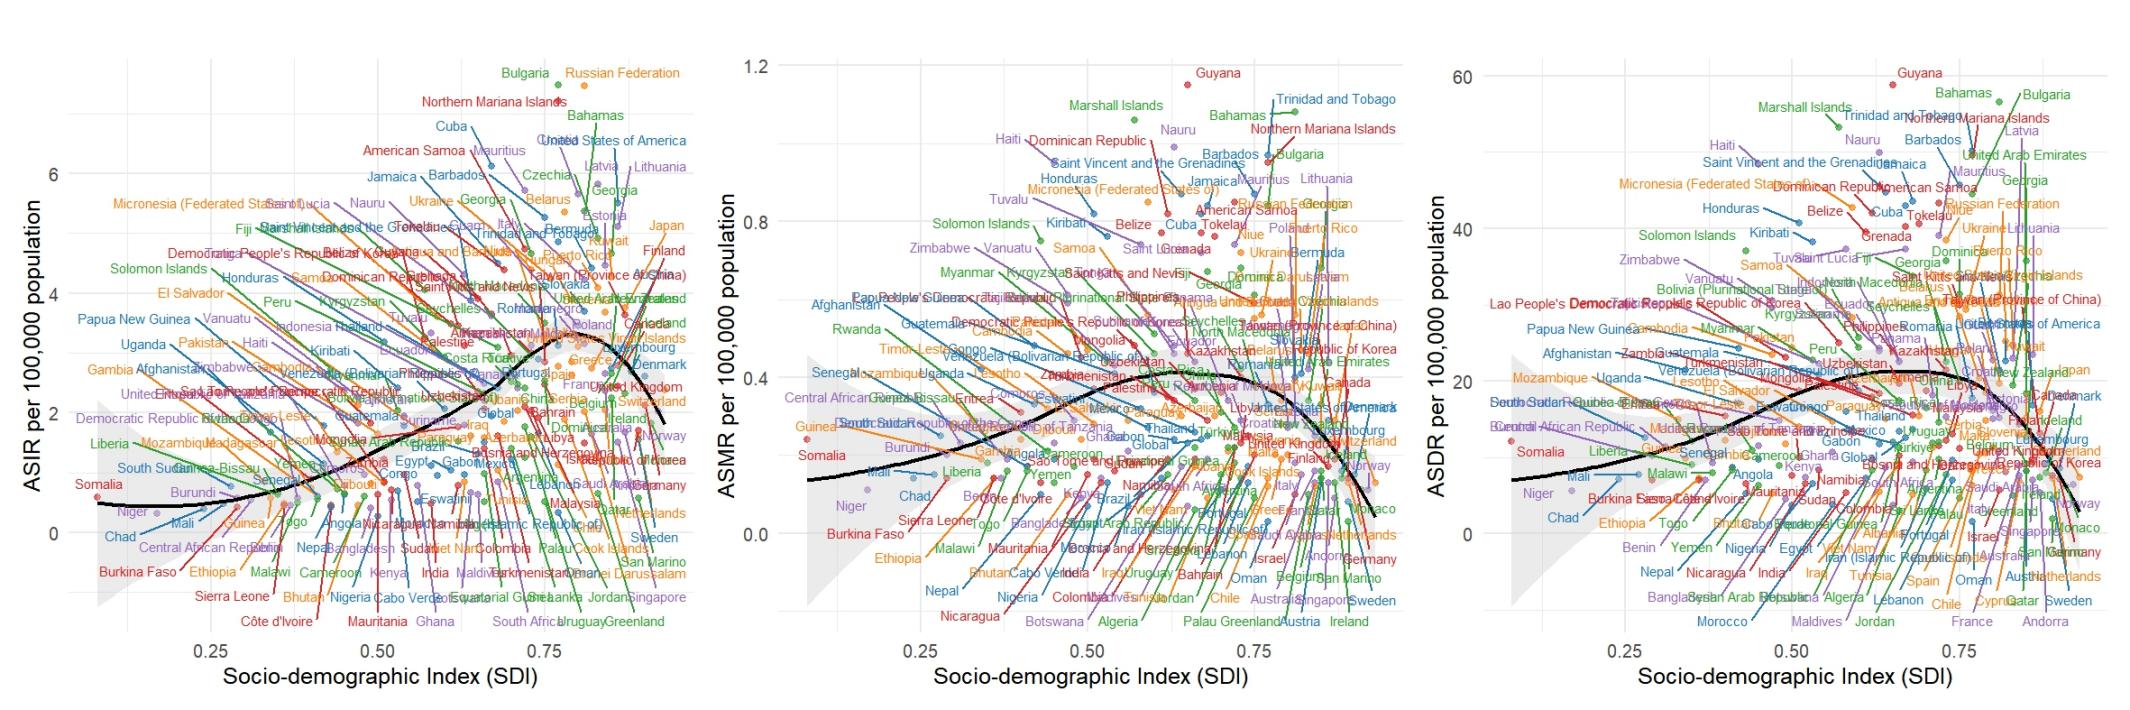


# Figure S3. Bivariate association between age-standardized rates of uterine cancer and country-level SDI in 2021.


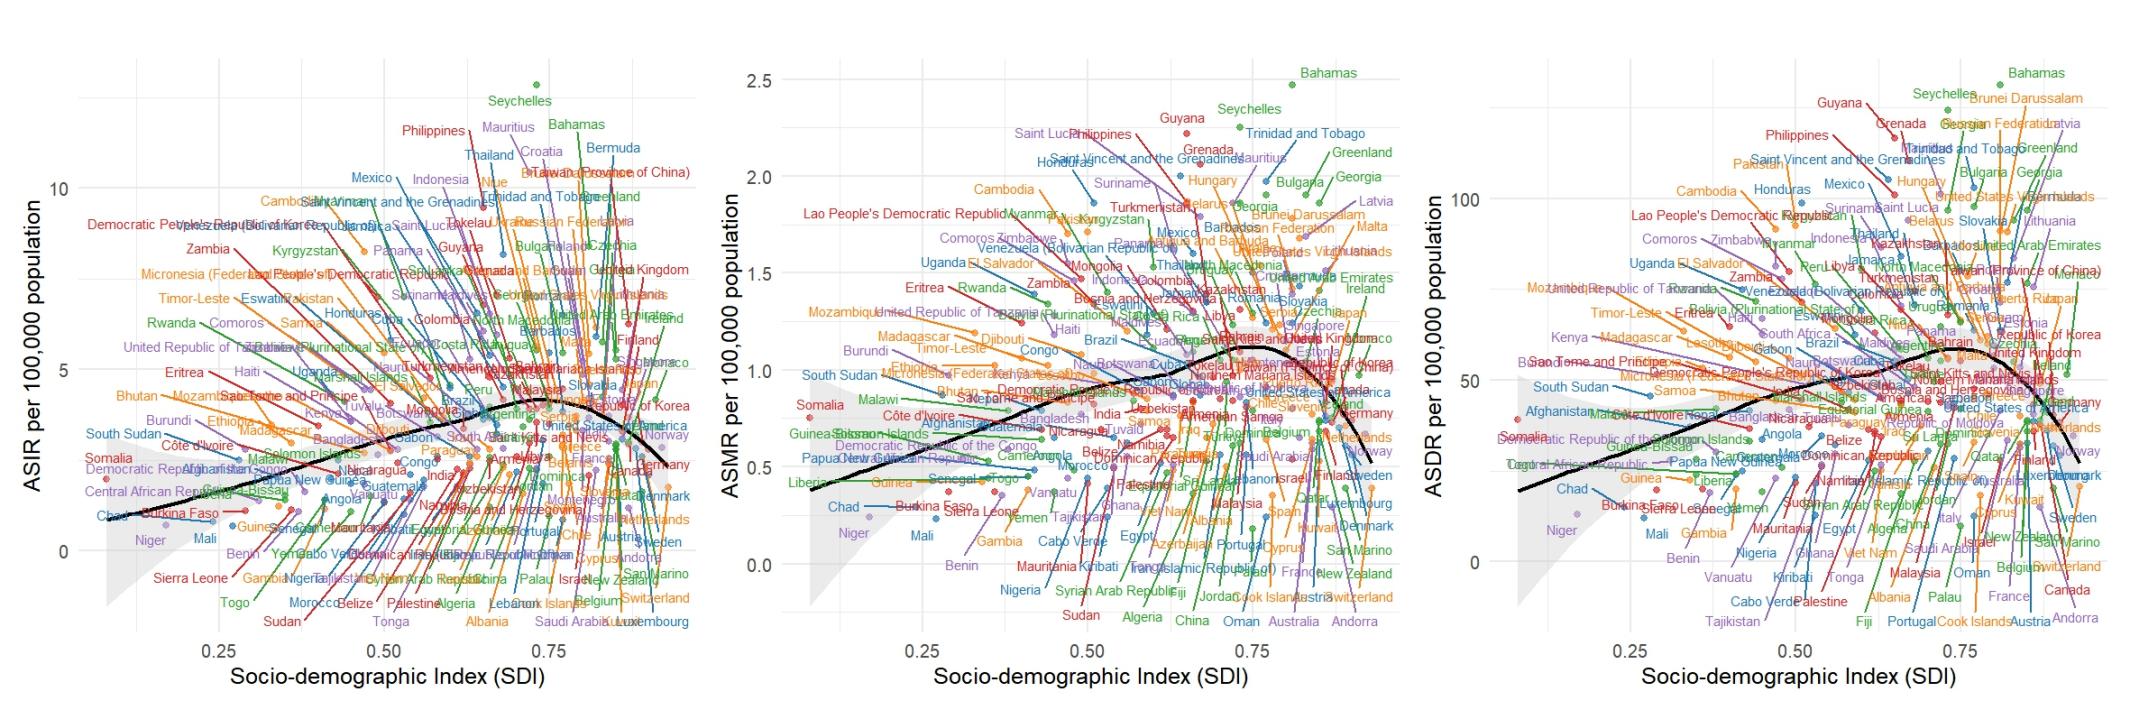


# Figure S4. Bivariate association between age-standardized rates of ovarian cancer and country-level SDI in 2

Table S1. Incidence, deaths, and DALYs number of Female Breast, Cervical, Uterine, and Ovarian Cancer in 2021

| **Locations** | **Female breast cancer** | | | **Cervical cancer** | | | **Uterine cancer** | | | **Ovarian cancer** | | |
| --- | --- | --- | --- | --- | --- | --- | --- | --- | --- | --- | --- | --- |
| **Incidence number, 95%UI** | **Death number, 95%UI** | **DALYs number, 95%UI** | **Incidence number, 95%UI** | **Death number, 95%UI** | **DALYs number, 95%UI** | **Incidence number, 95%UI** | **Death number, 95%UI** | **DALYs number, 95%UI** | **Incidence number, 95%UI** | **Death number, 95%UI** | **DALYs number, 95%UI** |
| Global | 129405.6 (120298.1 to 139007.9) | 6659459.9 (6192225.9 to 7145548.8) | 561438.1 (523146.5 to 602977.8) | 81639.9 (73783 to 90476) | 4184314.2 (3779640.7 to 4629604.6) | 307428 (280667.5 to 335692.3) | 7163.4 (5983.6 to 8042.2) | 373681.7 (308997.3 to 423440.7) | 58860.1 (50765.4 to 65452.4) | 25257.8 (22277.5 to 27861.2) | 1294995.6 (1139826.5 to 1431298.3) | 85748.8 (75168.9 to 95089.8) |
| High SDI | 14780.4 (14308 to 15226.4) | 791735 (753851.9 to 835670.6) | 125313 (121059 to 129586) | 4096.1 (3961.8 to 4236.6) | 216589.4 (208518.1 to 226283) | 32702.9 (31624 to 33776.8) | 999.5 (954.4 to 1041) | 55090 (51920.7 to 58769.3) | 15500.2 (14853.1 to 16142.9) | 3389.4 (3216.7 to 3528.6) | 169609 (160458.7 to 177637.4) | 12258.6 (11637.5 to 12755) |
| High-middle SDI | 20261.4 (18104.1 to 22581.7) | 1049179.4 (943000.3 to 1176899.7) | 124149.8 (109355.3 to 141572.9) | 9816.4 (8565.4 to 11107.6) | 501525.5 (437267.2 to 570233.8) | 50551.1 (43557.2 to 57901.1) | 1639.9 (1417.5 to 1928.8) | 87314.9 (74443.4 to 102200.4) | 18263.4 (15727.9 to 21188.3) | 4914.8 (4285.9 to 5584) | 244570.2 (213354.8 to 277875.7) | 15917.3 (13917.1 to 18073) |
| Middle SDI | 43250.7 (39297.9 to 47605.1) | 2202113.7 (1999760.1 to 2415548.6) | 183590.9 (166447.1 to 201981.8) | 24282.4 (22070 to 26621.1) | 1233604.2 (1123809.1 to 1357817.4) | 100530.1 (90897.6 to 111723.1) | 2498.4 (1890.3 to 2930) | 128113 (95572.9 to 150991.2) | 16726 (12538.4 to 19915.7) | 8438.5 (7178.2 to 9490) | 432907.9 (367025 to 485032.1) | 30147.2 (25272.2 to 34070.3) |
| Low-middle SDI | 35573.6 (31850.4 to 39391.6) | 1818680.6 (1616101.4 to 2022813.4) | 95123 (85515.7 to 104880.4) | 24831.9 (21862.3 to 28223.5) | 1270707.4 (1116264.6 to 1443059.5) | 76193.2 (67245.1 to 85723.7) | 1416.3 (1159.1 to 1720) | 72135.4 (59003.6 to 87763.6) | 6301.5 (5161.6 to 7482.1) | 6031.5 (5087.1 to 7039.1) | 316111.5 (266518.7 to 370144.7) | 19911.7 (16608.1 to 23214.5) |
| Low SDI | 15413.9 (13180.8 to 17932.2) | 791378.4 (674720.7 to 922524.1) | 32752.2 (28071.5 to 37901.9) | 18528.8 (15504.7 to 22399.1) | 957580.2 (799604.1 to 1159582.5) | 47151.6 (39337.9 to 57046.1) | 598.3 (444.6 to 803.6) | 30463.5 (22837.1 to 40845.8) | 1996 (1499.3 to 2644) | 2458.5 (1787.4 to 2976) | 130530.5 (95189.8 to 159501.1) | 7430.2 (5377.2 to 9085.3) |
| American Samoa | 2.4 (1.8 to 3.1) | 117.7 (88.3 to 153) | 6 (4.4 to 7.9) | 0.7 (0.5 to 1.1) | 36.6 (25.7 to 51.9) | 2.5 (1.8 to 3.5) | 0.2 (0.1 to 0.3) | 8 (3.5 to 15.4) | 0.9 (0.4 to 1.7) | 0.2 (0.1 to 0.2) | 7.7 (3.7 to 12.5) | 0.6 (0.3 to 1.1) |
| Antigua and Barbuda | 2.5 (2.3 to 2.8) | 126.1 (113.7 to 139.7) | 11.4 (9.9 to 13.1) | 1.1 (1 to 1.3) | 58 (52.8 to 64.5) | 5.1 (4.5 to 5.7) | 0.2 (0.2 to 0.3) | 11.5 (10.3 to 13.1) | 1.3 (1.2 to 1.5) | 0.5 (0.4 to 0.6) | 25.1 (22.2 to 28.3) | 1.6 (1.4 to 1.8) |
| Arab Republic of Egypt | 1614.5 (1174.2 to 2140.3) | 84720.3 (61799.4 to 112563.5) | 7624.3 (5605.5 to 10242.1) | 182.7 (131.5 to 244.5) | 9385 (6765.8 to 12591.2) | 601.6 (435 to 826) | 47.2 (27.8 to 72.5) | 2477 (1455.3 to 3787.8) | 359.6 (215.1 to 547.8) | 177.1 (126.3 to 232.8) | 9277 (6661.4 to 12133.8) | 583.7 (416.5 to 768.9) |
| Argentine Republic | 973 (878.2 to 1072.1) | 49359.9 (44709.1 to 54421) | 3720.4 (3292.2 to 4209.4) | 838.7 (748.9 to 939.8) | 43729 (39115 to 49085.4) | 3686.3 (3236.9 to 4151.3) | 33.3 (28.7 to 38.9) | 1749 (1509.4 to 2024.1) | 229.9 (196.3 to 268.9) | 191.1 (168.8 to 216.5) | 9700.9 (8653.8 to 10864.2) | 606.7 (538.4 to 687.9) |
| Australia | 327.9 (286.5 to 370.6) | 17763.3 (15523.6 to 20147.7) | 3083.7 (2623.2 to 3553.2) | 76.5 (65.8 to 89.5) | 4161 (3578.2 to 4860.4) | 719.5 (610.9 to 842.3) | 14.5 (12.4 to 17.3) | 813.5 (680.6 to 970.9) | 257.1 (213.2 to 310.7) | 62.3 (54.8 to 70.5) | 3150 (2796.4 to 3542.6) | 225.5 (200.3 to 252.1) |
| Barbados | 10 (7.6 to 12.7) | 504.8 (383.3 to 642.3) | 46.3 (34.8 to 60) | 5.1 (3.9 to 6.7) | 261.2 (197.8 to 342.2) | 23.3 (17.6 to 30.7) | 1.1 (0.8 to 1.4) | 55.7 (42.6 to 72.3) | 6.6 (5 to 8.8) | 1.8 (1.3 to 2.3) | 89.7 (67.4 to 117.3) | 5.6 (4.3 to 7.4) |
| Belize | 5.9 (5.1 to 6.8) | 300.3 (257.1 to 345) | 20.9 (17.8 to 24.7) | 10.9 (9.3 to 12.7) | 558.7 (478.6 to 653.4) | 41.5 (34.9 to 48.5) | 1.2 (1 to 1.4) | 62.3 (52.9 to 73.4) | 5.5 (4.6 to 6.6) | 1.1 (0.9 to 1.3) | 56.2 (48.9 to 65.1) | 3.4 (2.9 to 4) |
| Bermuda | 1.2 (0.9 to 1.5) | 62.5 (48.9 to 77.3) | 9.9 (7.7 to 12.4) | 0.3 (0.2 to 0.4) | 14.5 (11.2 to 18.7) | 1.9 (1.5 to 2.5) | 0.1 (0.1 to 0.1) | 5.8 (4.5 to 7.2) | 1.2 (0.9 to 1.5) | 0.4 (0.3 to 0.4) | 17.8 (14.3 to 21.9) | 1.2 (1 to 1.5) |
| Bolivarian Republic of Venezuela | 685.9 (488.1 to 908) | 35448.1 (25424.8 to 46783.1) | 3913.1 (2812.9 to 5210.4) | 821.7 (579.3 to 1088.1) | 42730.6 (29986.1 to 56329.7) | 4431.1 (3070.7 to 6096.3) | 41.4 (27.7 to 57.8) | 2088.9 (1391.8 to 2880.3) | 235.5 (156.8 to 323.8) | 139.5 (96.3 to 194.2) | 7122.2 (4908.3 to 9945.7) | 435.3 (300.4 to 610.5) |
| Bosnia and Herzegovina | 41.7 (29.3 to 54.9) | 2098.9 (1474.2 to 2773.2) | 218 (152.6 to 291.7) | 21.9 (14.9 to 29.5) | 1104.5 (753.6 to 1480.1) | 122.5 (82.1 to 163.2) | 3.1 (1.9 to 4.3) | 160.7 (99 to 224.7) | 30 (18 to 42.7) | 13.4 (8.4 to 18.8) | 651 (407.7 to 917.4) | 36.7 (23 to 51.7) |
| Brunei Darussalam | 12.3 (9.5 to 15.3) | 621.8 (482.2 to 766.2) | 47.4 (36.3 to 59.7) | 5.6 (4.3 to 7.2) | 283.2 (215.4 to 358.4) | 22.5 (17.3 to 28.8) | 0.8 (0.5 to 1.1) | 39 (27.1 to 54.4) | 4 (2.8 to 5.5) | 3.4 (2.4 to 4.7) | 172.2 (122.5 to 234.7) | 9.9 (7.1 to 13.4) |
| Burkina Faso | 388.6 (252.5 to 543) | 20198.4 (12961.5 to 28343.3) | 775.7 (489.2 to 1087.1) | 387.2 (262.7 to 535.7) | 20573.8 (13846.7 to 28227.7) | 1004 (677 to 1398.1) | 8.1 (5 to 12.5) | 414.5 (256.1 to 644.9) | 25 (15.6 to 38.9) | 21.9 (13.8 to 30.9) | 1189.5 (746.9 to 1669.8) | 67.6 (43.2 to 95) |
| Canada | 472.9 (426.6 to 518.7) | 25589.9 (22746.4 to 28342.4) | 4104.5 (3587.4 to 4663.5) | 134.7 (120 to 151.6) | 7609.6 (6791.4 to 8562.5) | 1694.4 (1453.5 to 1923.7) | 29 (23.9 to 34.8) | 1584.5 (1315.4 to 1894.9) | 427.8 (344.2 to 523.4) | 104.4 (92.2 to 117.9) | 5237.5 (4635.8 to 5868.7) | 383.5 (339.1 to 432.1) |
| Central African Republic | 88 (53.6 to 131.1) | 4357.7 (2642.3 to 6466.8) | 141 (85.8 to 211.1) | 199.7 (122 to 302.2) | 10071.3 (6107.8 to 15196.1) | 395 (238.8 to 591.8) | 3.7 (2.1 to 6.1) | 180.7 (103.2 to 298.1) | 8.6 (4.9 to 14.2) | 8.7 (5.2 to 13.5) | 444.5 (271.6 to 693.8) | 22 (13.6 to 35.4) |
| Commonwealth of Dominica | 1.8 (1.3 to 2.4) | 90.1 (64.6 to 119) | 5.8 (4.1 to 7.7) | 1.3 (0.9 to 1.8) | 67.1 (47.6 to 91.3) | 4.7 (3.3 to 6.4) | 0.1 (0.1 to 0.2) | 7.4 (5.1 to 11.2) | 0.6 (0.4 to 0.9) | 0.2 (0.1 to 0.3) | 9.5 (6.6 to 12.9) | 0.6 (0.4 to 0.8) |
| Commonwealth of the Bahamas | 20.7 (15.6 to 27) | 1047 (791 to 1365.5) | 79.2 (59.7 to 102.8) | 8.4 (6.3 to 10.9) | 428.9 (319.1 to 565.9) | 33.9 (25.3 to 43.7) | 1.8 (1.4 to 2.4) | 93.8 (69.1 to 122.3) | 9.1 (6.8 to 12) | 4.1 (3.1 to 5.3) | 208 (157.4 to 269.7) | 12.6 (9.6 to 16.6) |
| Cook Islands | 0.7 (0.5 to 1) | 36.4 (25 to 51.4) | 2.9 (1.9 to 4) | 0.1 (0 to 0.1) | 3.8 (2.5 to 5.6) | 0.4 (0.3 to 0.6) | 0 (0 to 0) | 0.7 (0.5 to 1.1) | 0.1 (0.1 to 0.2) | 0 (0 to 0) | 1.2 (0.7 to 1.8) | 0.1 (0.1 to 0.2) |
| Czech Republic | 146.2 (118.4 to 174.8) | 7672.9 (6222.5 to 9175.6) | 1106.4 (867.9 to 1340.8) | 48.3 (39.5 to 58.4) | 2444.9 (2009.5 to 2933.6) | 264.1 (213.6 to 324.2) | 16.9 (13.2 to 21.1) | 917.1 (712.4 to 1155.3) | 239 (181.9 to 305.2) | 47.6 (39.1 to 56.1) | 2358.7 (1945.4 to 2794) | 160 (130.4 to 191.2) |
| Democratic People's Republic of Korea | 501.2 (326 to 720.4) | 24893.3 (16274.5 to 35791.9) | 1629.5 (1058.5 to 2382.3) | 368.1 (230.1 to 535.2) | 18311.1 (11515.2 to 26561.1) | 1280 (820.5 to 1873.1) | 53 (28.5 to 85.2) | 2707.1 (1457.5 to 4259.5) | 359.6 (193.6 to 574.2) | 93.7 (58.5 to 142.4) | 4799 (2986.5 to 7254.2) | 452.4 (281.3 to 671.7) |
| Democratic Republic of Sao Tome and Principe | 3.3 (2.2 to 4.7) | 167.1 (112.9 to 234.9) | 8.5 (5.7 to 12) | 5.4 (3.4 to 7.9) | 279.6 (175.3 to 407.2) | 16.9 (10.8 to 25.1) | 0.1 (0.1 to 0.2) | 6.8 (3.8 to 11.5) | 0.6 (0.3 to 1) | 0.6 (0.3 to 0.9) | 30.2 (15.6 to 49.5) | 1.9 (0.9 to 3.1) |
| Democratic Republic of Timor-Leste | 16 (11 to 22.6) | 793.8 (540.5 to 1125.8) | 35.9 (24.5 to 50.9) | 10 (6.5 to 14.9) | 513.2 (332.8 to 753.2) | 27.3 (18 to 40.2) | 1.2 (0.7 to 2) | 63.2 (34.5 to 100.2) | 5.2 (2.8 to 8.2) | 4 (2.2 to 5.8) | 215.4 (119.9 to 311.5) | 19.2 (10.7 to 27.8) |
| Democratic Republic of the Congo | 1193.8 (829 to 1720.3) | 59611.7 (41833.5 to 86091.7) | 2337.8 (1610.9 to 3425.9) | 2004.5 (1234.1 to 3030.4) | 102323.4 (62456.4 to 151554) | 4904.1 (3064.6 to 7198) | 44 (24.7 to 71.6) | 2189.3 (1229.8 to 3543) | 135.6 (76.4 to 222.3) | 140 (75.1 to 218.1) | 7254.1 (3990.5 to 11306.8) | 391.7 (216.9 to 606.5) |
| Democratic Socialist Republic of Sri Lanka | 294.4 (176.4 to 435) | 14910.5 (9168.1 to 21993.8) | 1254.9 (750.9 to 1871) | 82.9 (47.8 to 123) | 4199.6 (2471.4 to 6211.3) | 368.6 (212.1 to 554.6) | 13.9 (6.8 to 23.6) | 736.4 (363.8 to 1249.5) | 127.3 (63.5 to 212.2) | 64.5 (35.4 to 97.8) | 3389.2 (1893.4 to 5043.7) | 338.7 (198.2 to 498.8) |
| Dominican Republic | 177.5 (129.6 to 233.7) | 8997.8 (6540.5 to 11817.9) | 587 (430.4 to 778.2) | 176.1 (122.1 to 241.2) | 9098.4 (6289 to 12611.1) | 646.4 (451.1 to 881.9) | 33.2 (19.3 to 51.3) | 1689.8 (982.1 to 2608.6) | 140.5 (80.9 to 218.2) | 26.3 (18.3 to 35.7) | 1363.5 (946.1 to 1860.3) | 81.2 (55.6 to 108.8) |
| Eastern Republic of Uruguay | 91.1 (82.3 to 101.4) | 4625.3 (4158.4 to 5133) | 393.9 (348.4 to 442.7) | 51.2 (44.9 to 57.3) | 2664.7 (2345.1 to 2983.8) | 245.7 (212.8 to 281.8) | 3.1 (2.6 to 3.6) | 159.6 (135.3 to 188.9) | 24.2 (20.1 to 28.9) | 16.4 (14.2 to 19.1) | 828.1 (720.3 to 954.6) | 53.1 (46.1 to 60.9) |
| Federal Democratic Republic of Ethiopia | 1606.4 (1232.9 to 2057.7) | 84143.6 (64622.4 to 107899.3) | 3456.8 (2632.1 to 4423.7) | 1591.3 (1117.7 to 2460.8) | 82494.9 (57928.8 to 127316.7) | 4156.1 (2884.7 to 6392.9) | 42 (25.3 to 78.8) | 2157.8 (1298.3 to 4062.3) | 142.5 (86.4 to 265.7) | 304.7 (147.5 to 435) | 16139.8 (7914 to 23423.2) | 914.9 (460.9 to 1324.2) |
| Federal Democratic Republic of Nepal | 354.1 (241.4 to 497.5) | 17999.4 (12382.4 to 25182.1) | 869.4 (594.5 to 1205.2) | 390.5 (254.4 to 562.3) | 19838.9 (12879.9 to 28712) | 1141.9 (743.1 to 1624.3) | 11.8 (6.1 to 25.9) | 601.1 (311.6 to 1321.9) | 48.5 (25.3 to 108.1) | 90.1 (56.9 to 163) | 4720.8 (3010.6 to 8593.1) | 277.1 (174.1 to 503.2) |
| Federal Republic of Germany | 1176.3 (1080.9 to 1270.5) | 62814.4 (57219 to 68799.7) | 9547 (8446.2 to 10729.8) | 277.7 (240.9 to 319.9) | 14628.7 (12637.9 to 17041.4) | 2028.5 (1686.8 to 2397.9) | 39.5 (34.2 to 45.4) | 2203.1 (1895.6 to 2577.9) | 663.6 (563.4 to 783.3) | 223.8 (197.4 to 253.9) | 11150.3 (9910.7 to 12579.1) | 775.4 (686.8 to 873.3) |
| Federal Republic of Nigeria | 3928.7 (2368.1 to 6033.5) | 196674.7 (117995.9 to 305265.4) | 8797.6 (5281.9 to 13811.7) | 2528 (1471.5 to 3891.6) | 133776.6 (76469.4 to 206682.6) | 7028.4 (3919.6 to 11062) | 46.7 (28.8 to 78.3) | 2362.2 (1443.8 to 3979) | 167.2 (98.9 to 282.6) | 281.3 (148.4 to 440.1) | 14917 (7934.5 to 23445.5) | 868.1 (444 to 1375.3) |
| Federal Republic of Somalia | 205.1 (126.4 to 312.1) | 10311.7 (6370.5 to 15581.1) | 340.1 (206.7 to 518.9) | 718.8 (463.2 to 1123.2) | 36160 (23501.4 to 56751.2) | 1451.3 (943.6 to 2302.1) | 12.9 (6.7 to 21.7) | 646.7 (335.8 to 1083) | 31.4 (16.2 to 53) | 40.6 (23.3 to 69.6) | 2130.5 (1241.3 to 3652.8) | 109.1 (64.6 to 183.3) |
| Federated States of Micronesia | 3.8 (2.5 to 5.4) | 188.7 (123 to 271) | 7.9 (5.1 to 11.5) | 2.4 (1.6 to 3.6) | 122.7 (80 to 177.4) | 7.2 (4.8 to 10.7) | 0.3 (0.1 to 0.5) | 14.9 (6.9 to 26.7) | 1.3 (0.6 to 2.3) | 0.3 (0.1 to 0.5) | 15.2 (7.1 to 25.4) | 1.2 (0.6 to 2) |
| Federative Republic of Brazil | 5148.5 (4873.6 to 5453) | 260810.1 (246407 to 276546.6) | 19757.1 (18586.5 to 21003.9) | 3489.5 (3302.2 to 3673) | 180977.9 (170848.5 to 190997.6) | 14479.4 (13700.3 to 15332.5) | 221.9 (208.4 to 237.8) | 11198.2 (10502.2 to 11998.2) | 1263.1 (1177.5 to 1357.1) | 931.4 (875.4 to 985.6) | 47846.7 (45065.6 to 50648.4) | 2951.9 (2781.4 to 3134.7) |
| French Republic | 958.6 (873.7 to 1049.1) | 52446.1 (47511.9 to 58476.8) | 9820.5 (8663.5 to 11125) | 188.3 (163.1 to 217) | 9798.8 (8539.8 to 11229.9) | 1378.8 (1182 to 1618.7) | 40.5 (34.1 to 48.2) | 2255.6 (1897 to 2697.6) | 688.5 (569.9 to 830.2) | 143.5 (123.5 to 165.3) | 7300.1 (6343.2 to 8363.7) | 642.7 (560.3 to 735.5) |
| Gabonese Republic | 41.2 (25.8 to 62.1) | 2063.4 (1301.5 to 3115) | 99.7 (63.7 to 150.3) | 40.2 (25.4 to 64.5) | 2038.3 (1293 to 3281.8) | 117.3 (72.7 to 192.7) | 1.4 (0.8 to 2.2) | 70.3 (39.3 to 110.8) | 5.7 (3.2 to 9.1) | 5.1 (3 to 8) | 266.3 (154.5 to 408.2) | 15.3 (8.8 to 23.6) |
| Georgia | 86 (72.7 to 99.7) | 4277.7 (3599 to 4954.2) | 317.6 (267 to 374.8) | 34.1 (29.1 to 39.5) | 1698 (1438.6 to 1966.9) | 140.1 (117.5 to 164.5) | 9.7 (8.4 to 11) | 495.7 (423.9 to 563) | 66.4 (56.7 to 77.2) | 25.3 (21.1 to 29.8) | 1255.4 (1052.2 to 1475.8) | 67.5 (56.7 to 79.6) |
| Grand Duchy of Luxembourg | 8.5 (7.5 to 9.5) | 455 (398.9 to 508.9) | 72.9 (62.8 to 84.1) | 1.2 (1 to 1.3) | 60.7 (53.4 to 68.8) | 8.7 (7.5 to 10.1) | 0.5 (0.4 to 0.5) | 26.3 (23 to 30.6) | 7.9 (6.8 to 9.2) | 2 (1.7 to 2.2) | 97 (85.6 to 110.5) | 7.1 (6.2 to 8.1) |
| Greenland | 0.9 (0.6 to 1.2) | 43.7 (29.5 to 60.2) | 3.3 (2.3 to 4.5) | 0.7 (0.5 to 0.9) | 36.3 (24.2 to 50.4) | 3.9 (2.5 to 5.5) | 0 (0 to 0) | 0.9 (0.6 to 1.5) | 0.1 (0.1 to 0.2) | 0.3 (0.2 to 0.5) | 17.1 (10.8 to 24.5) | 1 (0.7 to 1.5) |
| Grenada | 2.9 (2.3 to 3.5) | 145.8 (117.7 to 179.4) | 10.5 (8.4 to 12.8) | 2.4 (1.9 to 3) | 122.1 (95.1 to 155.9) | 9.4 (7.3 to 11.7) | 0.3 (0.2 to 0.4) | 15.1 (11.6 to 18.8) | 1.4 (1.1 to 1.7) | 0.8 (0.6 to 0.9) | 39.2 (32 to 47.6) | 2.4 (1.9 to 2.9) |
| Guam | 3.4 (2.7 to 4.2) | 167.7 (135.2 to 206.3) | 10.9 (8.7 to 13.4) | 1.2 (0.9 to 1.4) | 57.3 (46.7 to 69.2) | 5 (4 to 6.1) | 0.3 (0.2 to 0.3) | 13.6 (9.8 to 17.1) | 2.1 (1.5 to 2.7) | 0.6 (0.5 to 0.8) | 32.3 (23.1 to 40.5) | 2.8 (2 to 3.5) |
| Hashemite Kingdom of Jordan | 171.3 (115.7 to 247.9) | 8989.5 (5964.9 to 12933.5) | 1167.5 (770.8 to 1700) | 17.4 (12 to 24.1) | 892.4 (610.3 to 1231.4) | 72.3 (49 to 101.3) | 5.9 (3.7 to 9.7) | 317 (197.6 to 521) | 66.3 (40.9 to 108.9) | 25.3 (15.4 to 35) | 1300.2 (796.9 to 1792.1) | 86.8 (51.7 to 120.3) |
| Hellenic Republic | 183.8 (168.2 to 200.7) | 9558.3 (8709.6 to 10451.7) | 1382.7 (1221.4 to 1578) | 36.3 (32.9 to 40.2) | 1841.1 (1657.9 to 2021.1) | 229.2 (202.6 to 257.9) | 9.1 (8.3 to 9.9) | 488.8 (441 to 548.2) | 135.4 (118.9 to 153.5) | 42.1 (37.7 to 46.9) | 2031.8 (1824 to 2252.6) | 137.6 (121.9 to 154.2) |
| Hungary | 170.4 (140.2 to 203.2) | 8679.8 (7066.6 to 10389.8) | 1055.8 (851.7 to 1305.3) | 68.8 (50.5 to 88.2) | 3502.7 (2581 to 4572.3) | 440.7 (317.3 to 586.9) | 15.1 (12.1 to 18.6) | 799.6 (637.4 to 987.3) | 173.6 (133.9 to 218.2) | 51.8 (43.3 to 60.8) | 2507.7 (2109 to 2947.2) | 144.7 (120.1 to 171.7) |
| Independent State of Papua New Guinea | 268.5 (179.7 to 396) | 13654.5 (9092.3 to 20105.4) | 517.5 (347.5 to 744.5) | 189.9 (130 to 330.6) | 9711.7 (6651.5 to 16718.9) | 530.3 (367.7 to 906.5) | 16.2 (7.3 to 32.7) | 817.1 (361.8 to 1635.8) | 60.1 (26.8 to 119.8) | 16.1 (7.5 to 25.9) | 834.4 (384 to 1333.9) | 65.6 (29 to 105.5) |
| Independent State of Samoa | 3.9 (2.6 to 5.5) | 193.8 (127.4 to 273.2) | 9.5 (6.2 to 13.7) | 3.4 (2.1 to 5.1) | 177.7 (112.4 to 263.4) | 12.6 (7.8 to 18.3) | 0.3 (0.2 to 0.6) | 17.4 (9.2 to 30.8) | 1.9 (0.9 to 3.3) | 0.5 (0.3 to 0.7) | 25 (15.4 to 37.4) | 2.1 (1.3 to 3.2) |
| Ireland | 80.3 (71.6 to 89.6) | 4296.4 (3839.1 to 4811.9) | 738.8 (637.6 to 843.9) | 16.6 (14.1 to 19.2) | 869.6 (736 to 1007.5) | 128.4 (106 to 149.5) | 2.9 (2.4 to 3.5) | 164.6 (136.3 to 194.5) | 53.3 (43.6 to 64.6) | 16.5 (14 to 18.9) | 814.4 (697.7 to 934.6) | 59 (50.7 to 67.3) |
| Islamic Republic of Afghanistan | 434.4 (190.7 to 845.8) | 21581.6 (9461.7 to 42025.1) | 1109.6 (483.3 to 2165.1) | 311.8 (157.4 to 485.2) | 15878.3 (8284.6 to 24311.5) | 679.9 (353.4 to 1047.8) | 34.9 (15 to 63.3) | 1751.8 (757.1 to 3191.8) | 137.2 (60.8 to 252.3) | 58.9 (30.3 to 152.3) | 3050.3 (1607.2 to 7908.1) | 167.6 (89.2 to 439.2) |
| Islamic Republic of Iran | 1325.5 (1193.6 to 1481.4) | 73013.1 (64989.1 to 82063.8) | 11944.2 (10417.4 to 13646) | 143.3 (123.5 to 163.8) | 7373.5 (6367.2 to 8420.7) | 517.7 (435.1 to 603.9) | 40.4 (17 to 53.1) | 2219.1 (934.5 to 2923.3) | 471 (188.6 to 627.2) | 202.3 (119 to 241.8) | 10530.2 (6072.2 to 12568.2) | 705.1 (387.6 to 855.5) |
| Islamic Republic of Mauritania | 52.2 (36.8 to 73.8) | 2634.4 (1861.2 to 3710.6) | 132.3 (91.7 to 182.3) | 61.9 (40 to 94.9) | 3188.9 (2053 to 4827.6) | 190.9 (122.1 to 287.7) | 1.8 (1.1 to 3) | 92.7 (56.3 to 149.6) | 7.8 (4.7 to 12.7) | 5 (2.6 to 7.5) | 268.4 (138 to 400.7) | 16.4 (8.4 to 24.8) |
| Islamic Republic of Pakistan | 7172 (4999.5 to 10014.8) | 374321.5 (261039.1 to 519045) | 15691.4 (10890.5 to 21983.9) | 1500.5 (1021.7 to 2138) | 79978.8 (54075 to 114047.4) | 4236.2 (2867.1 to 5992.9) | 356.3 (225 to 537.3) | 18404.1 (11552.2 to 27762.8) | 1251 (779.9 to 1882.6) | 1274.1 (729.5 to 1919.6) | 68397.9 (38634.4 to 103245.2) | 3988.3 (2207.2 to 5978) |
| Jamaica | 93.7 (66.6 to 125.9) | 4739.5 (3374.5 to 6368.3) | 386 (273.6 to 535.6) | 59 (40.4 to 81.1) | 3053.4 (2106.8 to 4217.9) | 257.5 (177.5 to 358.7) | 9.4 (6.5 to 13.2) | 479.6 (331.8 to 675.3) | 49.9 (34.3 to 71.3) | 14.7 (10.3 to 20.6) | 751.3 (530.7 to 1052.9) | 46.5 (33.3 to 65.2) |
| Japan | 1459 (1417.2 to 1494.1) | 78163.5 (74117.1 to 82299.4) | 14132.7 (12903.2 to 15316.9) | 593.8 (574.2 to 612.6) | 30550.9 (29361 to 31895.7) | 4452.4 (4073.9 to 4863.2) | 160.1 (155.5 to 164.6) | 8413.8 (8011.9 to 8836.2) | 1966.6 (1794 to 2155.4) | 467.7 (454.8 to 481.7) | 22989.7 (22318.7 to 23655.9) | 1551.1 (1464.5 to 1657.6) |
| Kingdom of Bahrain | 27.8 (21.7 to 35.9) | 1484.9 (1160.9 to 1897.9) | 208.6 (161.7 to 267.6) | 2.6 (1.9 to 3.7) | 135.9 (96.5 to 189.8) | 11.7 (8.3 to 16) | 1 (0.6 to 1.6) | 55.5 (34.6 to 88) | 12.6 (7.7 to 20.5) | 5.5 (3.6 to 7.8) | 280.4 (188.3 to 394.6) | 18.6 (12.5 to 25.5) |
| Kingdom of Belgium | 157.7 (143.5 to 172.2) | 8393.4 (7587.8 to 9249.6) | 1296.7 (1131.5 to 1475) | 33.9 (29 to 39.1) | 1765.1 (1513.4 to 2061.1) | 242.1 (199.9 to 288.1) | 7.4 (6.2 to 8.8) | 409.8 (341.5 to 487.5) | 120.6 (99.3 to 145) | 32.1 (27.7 to 37.3) | 1599.9 (1391.6 to 1837) | 115.8 (100.6 to 132.7) |
| Kingdom of Bhutan | 7.8 (5.1 to 11.6) | 398.8 (259.1 to 592.4) | 20.6 (13.2 to 30) | 8.3 (5.3 to 12.4) | 420.9 (272.3 to 636.6) | 25.8 (16.3 to 40.6) | 0.3 (0.1 to 0.6) | 14.3 (7 to 32.5) | 1.3 (0.6 to 2.9) | 2.2 (1.3 to 4.1) | 117.2 (69.6 to 216.5) | 7 (4.1 to 13.1) |
| Kingdom of Cambodia | 401.9 (279.6 to 552.1) | 20098 (13985.5 to 27590.8) | 974.2 (663.9 to 1376.8) | 213.2 (148.2 to 304.2) | 10841.7 (7523.6 to 15539.7) | 620.5 (429.2 to 898.6) | 27.6 (14.4 to 46.6) | 1411 (737.3 to 2351.8) | 128.4 (68.3 to 218.4) | 100.1 (55.3 to 162.1) | 5330.5 (2949.4 to 8664.4) | 466.8 (258.4 to 763.9) |
| Kingdom of Denmark | 66.7 (57.9 to 75.9) | 3559.7 (3098.9 to 4085.7) | 548.8 (462 to 641.7) | 17.8 (15.2 to 20.6) | 932.9 (805.8 to 1086.3) | 129.1 (108.4 to 152.6) | 3.5 (2.9 to 4.1) | 194 (160.5 to 229.8) | 60.6 (49.3 to 74.3) | 12.3 (10.5 to 14.4) | 609.4 (523.2 to 708.5) | 40.8 (35 to 47.2) |
| Kingdom of Eswatini | 25.5 (13.2 to 41.5) | 1288.1 (662 to 2097.1) | 54.3 (27.8 to 90.4) | 42.5 (21.1 to 73.2) | 2138.7 (1059.5 to 3707.8) | 109.2 (54.7 to 188.4) | 1 (0.4 to 1.8) | 49.6 (20.9 to 89) | 3.4 (1.4 to 6.2) | 4.4 (2 to 8) | 231.6 (107.2 to 428.8) | 13.1 (6 to 23.6) |
| Kingdom of Lesotho | 39.4 (22.6 to 61.2) | 1969.7 (1135.4 to 3050.9) | 74.1 (42.4 to 114.2) | 80.3 (43.3 to 130.6) | 3998.8 (2176.9 to 6500.3) | 181.9 (96.6 to 303.2) | 1.6 (0.9 to 2.9) | 81.2 (42.3 to 139.3) | 4.8 (2.5 to 8.4) | 5.7 (3 to 10.7) | 302.3 (159.4 to 554.2) | 16.3 (8.7 to 29.9) |
| Kingdom of Morocco | 535.5 (344.8 to 854.8) | 27241.4 (17909.9 to 43500.1) | 2289 (1483.8 to 3571.3) | 308.7 (197.8 to 459.1) | 15177.8 (9809.5 to 22551.5) | 886.3 (581.8 to 1333.8) | 11 (6.5 to 18.6) | 560.8 (325.7 to 939.6) | 77.2 (44.9 to 130.4) | 90.5 (53.3 to 137.5) | 4532.8 (2694.2 to 6817.5) | 264.9 (160.3 to 391.1) |
| Kingdom of Norway | 53.2 (50 to 56.6) | 2840.5 (2638.7 to 3062.5) | 468.9 (422.1 to 522.5) | 17.9 (16.5 to 19.3) | 950.2 (881.5 to 1023) | 138.8 (124.8 to 153.8) | 2.5 (2.4 to 2.8) | 141.8 (128.1 to 158) | 45.1 (40.2 to 50.5) | 14.1 (13.2 to 15.1) | 704.9 (658.7 to 754) | 54.6 (50.1 to 59.6) |
| Kingdom of Saudi Arabia | 649.3 (431.1 to 916.6) | 33627.2 (22450 to 47218.3) | 3402.8 (2224.9 to 5009.3) | 51.3 (35.6 to 75.4) | 2741.5 (1903.2 to 3976) | 452.6 (309.1 to 647.3) | 24 (13.7 to 39.1) | 1295.5 (751.7 to 2080) | 266 (153.3 to 419.6) | 100.6 (63.7 to 164.1) | 5093.7 (3220 to 8257.9) | 326.3 (212.5 to 535.9) |
| Kingdom of Spain | 656.9 (582.2 to 733.8) | 34756.3 (30788.9 to 38740) | 5621.4 (4926.7 to 6409.4) | 129.9 (111.1 to 150.4) | 6770.8 (5811.9 to 7790.4) | 1067.4 (900.2 to 1246.9) | 31.4 (26.1 to 37.1) | 1767.1 (1430.3 to 2094.2) | 604 (490.4 to 732.3) | 136.8 (118.2 to 157.5) | 6696.5 (5788.9 to 7710.3) | 537.6 (461.1 to 621.5) |
| Kingdom of Sweden | 86.4 (72 to 102.4) | 4676.8 (3916 to 5552.9) | 783.6 (647.7 to 931) | 24.5 (20.4 to 29.4) | 1319.5 (1094 to 1574.4) | 188.9 (155 to 227) | 3.2 (2.6 to 3.8) | 180.6 (142.9 to 220.9) | 63.4 (50.6 to 77.1) | 22.9 (19.2 to 27.4) | 1150 (961.8 to 1373.1) | 86.7 (72.2 to 103.2) |
| Kingdom of Thailand | 1810.3 (1354.8 to 2376.3) | 91876.9 (69021.1 to 121406) | 8071.5 (5887.6 to 10700.6) | 931.9 (662.2 to 1295.7) | 47487.7 (33586.9 to 66235.8) | 4385 (3089.7 to 6074.5) | 77.1 (46 to 113.2) | 4059.2 (2409.9 to 5919) | 739.7 (439.5 to 1120.1) | 388.7 (204.9 to 550.2) | 20061.9 (10586.2 to 28070.8) | 1952 (1016.4 to 2734.2) |
| Kingdom of Tonga | 3.7 (2.5 to 5) | 184.5 (124.8 to 254.8) | 9.5 (6.5 to 13.4) | 2 (1.3 to 2.9) | 101.7 (67.8 to 147.7) | 7.3 (4.9 to 10.7) | 0.2 (0.1 to 0.3) | 8.2 (4.2 to 12.7) | 0.9 (0.5 to 1.4) | 0.2 (0.1 to 0.3) | 8.8 (4.3 to 14) | 0.8 (0.4 to 1.2) |
| Kingdom of the Netherlands | 245.1 (222.8 to 270) | 13174.7 (11874 to 14612.6) | 2168.6 (1926.5 to 2462.2) | 38.1 (32.3 to 45.1) | 2041.2 (1726.4 to 2389.4) | 317.7 (267.6 to 370.4) | 8.8 (7.2 to 10.6) | 465 (376.2 to 556.2) | 104.8 (85.3 to 128.3) | 44 (37.6 to 50.1) | 2200.9 (1894.8 to 2483.7) | 146.6 (125.5 to 167.5) |
| Kyrgyz Republic | 84.5 (64.6 to 106.9) | 4311.4 (3291.6 to 5467.8) | 296 (224.8 to 380.7) | 73.8 (54.4 to 96) | 3766.7 (2769.7 to 4929.5) | 304.5 (224.3 to 404.8) | 11.1 (8.5 to 13.9) | 580 (441.3 to 729) | 70.3 (53 to 89.7) | 35.8 (28.2 to 44.9) | 1851.9 (1483.5 to 2318.2) | 102.8 (80.8 to 128.9) |
| Lao People's Democratic Republic | 156.4 (108.7 to 214.7) | 7823.7 (5382 to 10813.6) | 342.9 (232.6 to 470.8) | 87.9 (59.2 to 124.1) | 4504.9 (3057.8 to 6345.1) | 236.5 (160.1 to 329) | 11.6 (6.2 to 18.3) | 593 (314 to 921.7) | 47.2 (24.9 to 73) | 37.3 (21.8 to 60.9) | 1996.3 (1148.5 to 3298.6) | 171.2 (95.8 to 290.6) |
| Lebanese Republic | 112.9 (85.5 to 145) | 5969.3 (4493.2 to 7730.5) | 885.6 (658.9 to 1169.6) | 12.2 (9 to 16.5) | 634.8 (470.6 to 848.1) | 57.4 (42.3 to 75.8) | 3 (1.9 to 4.8) | 164.1 (105.3 to 263.3) | 39.2 (24.8 to 63) | 19 (11.9 to 27.3) | 973.8 (610.9 to 1395.7) | 65.3 (40.7 to 94.8) |
| Malaysia | 961 (764.8 to 1175.5) | 48181.5 (38303.6 to 58958.4) | 3459.3 (2687.1 to 4233.4) | 305.6 (221.9 to 380) | 15403.1 (11258.5 to 19000.6) | 1203.1 (886.2 to 1477.7) | 30 (22 to 40.2) | 1546.2 (1127.5 to 2059) | 227.1 (164.7 to 307) | 94.1 (69.3 to 147.8) | 4848 (3544.6 to 7803.2) | 446.3 (324.9 to 742.3) |
| Mongolia | 27 (21.1 to 33) | 1352.5 (1050.4 to 1649.9) | 77.9 (60.4 to 96.8) | 44.2 (32.7 to 57.7) | 2224.4 (1649.7 to 2881.3) | 153.5 (113.2 to 198.7) | 4.7 (2.9 to 7) | 238.2 (144.3 to 357.6) | 24 (14.7 to 36.4) | 15.8 (11 to 21.1) | 795 (553.2 to 1069.9) | 41 (28.4 to 56) |
| Montenegro | 13.2 (10.3 to 16.8) | 676.8 (527.7 to 849.9) | 83.6 (64 to 108.3) | 3.8 (2.8 to 5.2) | 199.3 (145.9 to 267) | 26 (19 to 34.5) | 0.7 (0.5 to 1) | 38.8 (27.3 to 54.4) | 8.5 (6 to 11.9) | 2.6 (1.9 to 3.6) | 130.1 (91.1 to 174.5) | 7.7 (5.4 to 10.4) |
| New Zealand | 91.2 (84.2 to 98.6) | 4800.3 (4415 to 5223.5) | 683.2 (619 to 756.5) | 14.6 (12.8 to 16.7) | 767.7 (673.2 to 878.8) | 81.8 (70.4 to 94.2) | 5 (4.4 to 5.7) | 259.8 (228.7 to 293.8) | 50.2 (43 to 57.6) | 13.2 (11.3 to 15.4) | 665.4 (574.1 to 768.6) | 49.3 (42.3 to 57.2) |
| North Macedonia | 46 (33.3 to 61.2) | 2311.3 (1683 to 3095.7) | 230.7 (164.2 to 312.7) | 16.4 (11.9 to 21.8) | 835.8 (605.9 to 1111.8) | 91.3 (65.2 to 121.7) | 3.8 (2.5 to 5.4) | 195.5 (126.7 to 281.6) | 34.9 (22.8 to 51.6) | 12.3 (8.5 to 17) | 605.5 (418.1 to 831.5) | 34 (23.6 to 46.7) |
| Northern Mariana Islands | 1.6 (1.3 to 2.1) | 80.5 (61.7 to 100.8) | 5.1 (3.9 to 6.4) | 1 (0.8 to 1.3) | 50.8 (37.9 to 65.4) | 4.2 (3.1 to 5.3) | 0.2 (0.1 to 0.3) | 11.5 (7.5 to 16.9) | 1.7 (1.1 to 2.6) | 0.2 (0.1 to 0.3) | 9.7 (7.1 to 12.9) | 0.8 (0.6 to 1.1) |
| Palestine | 81.8 (65.5 to 100.6) | 4344 (3471.8 to 5390.3) | 463.3 (364.5 to 580) | 3.4 (2.5 to 4.4) | 174.8 (129.4 to 230.7) | 12.7 (9.4 to 16.6) | 5.2 (3.1 to 7.5) | 282 (164.5 to 409.3) | 47.9 (27.9 to 70.1) | 10 (7 to 13) | 527.9 (373 to 680.8) | 35 (24.8 to 45) |
| People's Democratic Republic of Algeria | 455.8 (337.5 to 608.9) | 23619.9 (17552.5 to 31459.6) | 2570.3 (1862.7 to 3480) | 251.7 (183.8 to 342.1) | 12946.5 (9470.2 to 17621.5) | 943.1 (692.8 to 1269.1) | 9.8 (6.5 to 14.8) | 520.7 (340 to 780.5) | 92.1 (59.4 to 136.3) | 61.7 (41.9 to 86.5) | 3130.8 (2125.6 to 4409.5) | 195.6 (130.5 to 275.2) |
| People's Republic of Bangladesh | 2492.3 (1803.9 to 3399.5) | 127603.5 (92793.4 to 172463) | 6946.8 (4986.5 to 9393.7) | 1700.6 (1075.5 to 2605.9) | 86912.4 (55337.9 to 134432.2) | 5520.5 (3576.6 to 8501.6) | 54.9 (28.2 to 133.5) | 2820.8 (1418.9 to 6963.1) | 260.7 (129.9 to 653.8) | 472.2 (245.3 to 836.3) | 24915.8 (12793.2 to 44061) | 1528.2 (786 to 2715) |
| People's Republic of China | 16439.3 (12282.1 to 21419.6) | 861866.6 (648610.2 to 1119103) | 110371.4 (82542.9 to 142344.8) | 9212.4 (6630.3 to 12141.7) | 467647.4 (335980.5 to 621267.2) | 49796.2 (35518.2 to 65634.1) | 1597.4 (1109.8 to 2200.7) | 83645.4 (57606.3 to 117195.5) | 14312.1 (9842 to 20370.3) | 3531.8 (2553.1 to 4734.9) | 176403.4 (126934.2 to 236354.7) | 11339.4 (8278.9 to 15199.5) |
| Plurinational State of Bolivia | 202.6 (140.1 to 285.5) | 10132.6 (6981.3 to 14237.3) | 558.4 (376.3 to 796.7) | 256.9 (174 to 382) | 12902.2 (8765.2 to 19316.4) | 785.5 (530.6 to 1166.8) | 22.1 (13.4 to 34.8) | 1098.9 (663.7 to 1714.3) | 88.8 (51.6 to 142) | 46 (28.5 to 67.6) | 2401.8 (1472.9 to 3547.1) | 140.2 (85.4 to 209.8) |
| Portuguese Republic | 185.3 (168.5 to 202.3) | 9866.8 (8882.5 to 10946.3) | 1618.6 (1412.3 to 1852.7) | 49.7 (43.2 to 56.8) | 2587.8 (2248.5 to 2938.5) | 358 (306.5 to 409.3) | 8.3 (7 to 9.8) | 460.4 (387.3 to 547.1) | 143.1 (117.5 to 173.3) | 27.7 (23.6 to 31.9) | 1332.4 (1143.9 to 1521.5) | 79.4 (68.3 to 90.5) |
| Principality of Andorra | 1.7 (1.1 to 2.5) | 91.4 (58.9 to 130.7) | 15.4 (9.7 to 22.8) | 0.2 (0.1 to 0.3) | 9.1 (5.5 to 14.3) | 1.3 (0.8 to 2.1) | 0 (0 to 0.1) | 2.4 (1.4 to 3.7) | 0.8 (0.4 to 1.2) | 0.1 (0.1 to 0.2) | 6.1 (3.5 to 9) | 0.4 (0.3 to 0.6) |
| Principality of Monaco | 1.2 (0.8 to 1.7) | 63.1 (42.1 to 91.3) | 10.2 (6.8 to 14.5) | 0.1 (0.1 to 0.2) | 7.7 (5 to 11.2) | 1.1 (0.7 to 1.7) | 0 (0 to 0) | 0.9 (0.5 to 1.3) | 0.3 (0.2 to 0.4) | 0.1 (0.1 to 0.2) | 6.5 (3.6 to 11.2) | 0.5 (0.3 to 0.8) |
| Puerto Rico | 52.5 (41.3 to 63.8) | 2701.7 (2148.9 to 3270.5) | 357.8 (283.5 to 442.4) | 18.5 (14.5 to 23.2) | 949.6 (745.1 to 1190) | 110.6 (85.6 to 138.9) | 6.2 (4.9 to 7.8) | 320.9 (255.6 to 403.1) | 54.4 (41.9 to 68.3) | 12.5 (9.9 to 15.7) | 627.8 (496.6 to 786.6) | 42.1 (33.1 to 52.7) |
| Republic of Albania | 27.8 (19.8 to 37.1) | 1419.5 (1001.9 to 1896.9) | 146.7 (102.9 to 199.6) | 9.5 (5.9 to 14.7) | 495.5 (306.8 to 764.2) | 57.1 (35.2 to 89.5) | 2.1 (1.3 to 3.5) | 111.8 (65.2 to 179.4) | 20.6 (12.1 to 32.8) | 4.9 (3 to 7.3) | 245.7 (153 to 369.2) | 14.3 (9 to 21.5) |
| Republic of Angola | 484.9 (325.2 to 681.5) | 24437.3 (16397.9 to 34326.4) | 983 (657.5 to 1385.2) | 724.2 (460.2 to 1099.6) | 37315.3 (23691.8 to 56245.2) | 1854.4 (1171 to 2825.1) | 16.9 (9.5 to 27.6) | 848.7 (481.8 to 1393.4) | 54.4 (30.9 to 88.4) | 56.6 (26.9 to 89.1) | 2967.5 (1453.1 to 4649.7) | 163.8 (83.5 to 259.7) |
| Republic of Armenia | 40.3 (34.1 to 47) | 2057.3 (1738.3 to 2408.3) | 176.9 (148.9 to 210.5) | 16.4 (13.9 to 19) | 825.5 (701.2 to 955.1) | 77.6 (64.7 to 91.6) | 4.6 (3.9 to 5.4) | 234.9 (197.9 to 276) | 37.5 (31.2 to 44.6) | 10.2 (8.1 to 12.4) | 508.4 (403.6 to 619.4) | 28.4 (22.8 to 35.1) |
| Republic of Austria | 108.2 (98.5 to 117.8) | 5792.2 (5292.8 to 6368.1) | 910.1 (803.7 to 1038.3) | 22.1 (18.9 to 25.6) | 1145.7 (994.5 to 1319.7) | 147.8 (126.3 to 171.7) | 5.2 (4.5 to 6.1) | 299.3 (255.4 to 351.3) | 102.4 (85.6 to 120.9) | 22.2 (19.2 to 25.3) | 1111.7 (975.1 to 1255) | 87.5 (76.2 to 99.3) |
| Republic of Azerbaijan | 183.8 (134.6 to 237.8) | 9264 (6825.4 to 11974.2) | 632.3 (453.7 to 822.3) | 57.2 (42.6 to 73.6) | 2917.5 (2160.4 to 3749.1) | 233.4 (172.3 to 307.6) | 12.7 (9.1 to 21) | 652.9 (464.7 to 1080.3) | 79.5 (57.4 to 132.8) | 29.5 (17.9 to 45.1) | 1498.8 (906.2 to 2282) | 81.2 (48.5 to 128.1) |
| Republic of Belarus | 158.2 (119.5 to 206.3) | 8058 (6053.6 to 10616.2) | 899.5 (659.6 to 1172.2) | 92.5 (68.8 to 120.3) | 4695.2 (3510.1 to 6109.2) | 436 (323.1 to 563) | 15.5 (11.6 to 20.4) | 847 (629.9 to 1089.2) | 226 (164.8 to 292.8) | 50.2 (37.5 to 65.5) | 2441.9 (1826.6 to 3185) | 132 (98.8 to 168.5) |
| Republic of Benin | 122.1 (80.4 to 174.8) | 6212.2 (4061.2 to 8894.9) | 254.1 (165.3 to 361.7) | 189.8 (126.2 to 275.7) | 9986.2 (6632.5 to 14505.2) | 507.7 (329.6 to 723.8) | 4.9 (3 to 7.9) | 251.7 (155.4 to 399.4) | 16.3 (9.6 to 26.1) | 12.7 (7.6 to 19.1) | 686.4 (411.7 to 1032.7) | 39.5 (24 to 58) |
| Republic of Botswana | 51.3 (29.3 to 82.8) | 2592.5 (1469.7 to 4219.1) | 119.1 (67.7 to 193.3) | 49.8 (30.3 to 84.6) | 2508.5 (1512.7 to 4292.6) | 138.1 (84.6 to 240.6) | 1.6 (0.8 to 3.2) | 82.1 (42.1 to 157.2) | 6.3 (3.2 to 12) | 8.3 (3.6 to 13.5) | 435.5 (185.1 to 704.4) | 24.8 (10.7 to 39.2) |
| Republic of Bulgaria | 168.1 (134.2 to 205.4) | 8498.5 (6759 to 10435.3) | 900.8 (712.3 to 1124) | 93 (76 to 109.5) | 4673.9 (3798.2 to 5569.4) | 463.9 (373.4 to 564.3) | 25.4 (19.8 to 32) | 1304.4 (1010.4 to 1646.9) | 226.2 (171.3 to 291.6) | 54.5 (42.6 to 68.8) | 2652.5 (2084.5 to 3331.3) | 140.7 (109.3 to 177) |
| Republic of Burundi | 146.9 (98.6 to 210.7) | 7595.7 (5106.2 to 10942.6) | 272.5 (187 to 391) | 290.8 (199 to 427) | 15126.2 (10415.1 to 22147.3) | 681.7 (462.8 to 1004.3) | 6.4 (3.5 to 11) | 331.4 (183.8 to 563.2) | 18.2 (10 to 30.3) | 32 (17.6 to 45.7) | 1738.3 (963.4 to 2443.2) | 96.6 (55.4 to 134.1) |
| Republic of Cabo Verde | 7.3 (5.3 to 9.7) | 373.2 (268.7 to 494.8) | 22.9 (16.4 to 29.9) | 5.3 (3.7 to 7.3) | 273.7 (189.6 to 379.1) | 19.5 (13.2 to 27.8) | 0.2 (0.1 to 0.5) | 12.8 (7.5 to 27.8) | 1.4 (0.8 to 2.9) | 0.7 (0.3 to 1.1) | 39.8 (18.1 to 59) | 2.6 (1.1 to 3.8) |
| Republic of Cameroon | 434.5 (294.9 to 630.2) | 22297.4 (15094.7 to 32407.4) | 942.8 (619.7 to 1352.3) | 598.1 (355.6 to 875.8) | 31631.9 (18787.3 to 45969.6) | 1678.3 (983.2 to 2469.4) | 15 (8.8 to 23.6) | 770.7 (450.1 to 1187.6) | 52.1 (31 to 83) | 42.1 (22.9 to 62.9) | 2282.8 (1261.6 to 3421.3) | 133.3 (74.5 to 196) |
| Republic of Chad | 134.7 (88.3 to 196.4) | 6780.8 (4416.8 to 9877.7) | 245.8 (161.1 to 358.8) | 307.3 (208 to 433.3) | 16054.7 (10950.1 to 22607.8) | 720.5 (481.9 to 1041.2) | 5.6 (3.5 to 9.1) | 284 (175.1 to 463.9) | 15.6 (9.6 to 25) | 11.5 (6.1 to 17.3) | 616 (326.3 to 928.2) | 33.5 (18.7 to 51.6) |
| Republic of Chile | 226.4 (203.3 to 251.1) | 11716 (10503.5 to 13036.1) | 1194.4 (1053.5 to 1345.8) | 195.7 (168.4 to 224.2) | 10348.7 (8952.1 to 11906.9) | 1119.5 (956.7 to 1291.7) | 8.9 (7.7 to 10.3) | 473.8 (411.9 to 544.9) | 86.4 (73.4 to 101.9) | 64.1 (56.1 to 72.7) | 3250.2 (2860 to 3664.7) | 218.1 (190.4 to 249.1) |
| Republic of Colombia | 821.4 (663 to 1004.5) | 43556.9 (35170.2 to 53203.2) | 6042.7 (4807.2 to 7618.9) | 649.9 (517.2 to 810.4) | 34395.4 (27403.6 to 42822.9) | 4294.3 (3374 to 5417) | 38.1 (29.4 to 48.2) | 1973 (1526.1 to 2469.7) | 274.7 (210.7 to 347) | 242.8 (193.2 to 303.8) | 12606.2 (10104.6 to 15625.7) | 829.6 (669.1 to 1006.2) |
| Republic of Costa Rica | 85.5 (71.3 to 101) | 4605 (3843.5 to 5422.9) | 714.2 (588.3 to 851.1) | 53.2 (44.7 to 62.1) | 2819.2 (2352.2 to 3282.2) | 381.1 (314.2 to 451.1) | 6.2 (5 to 7.6) | 321 (265.5 to 388.9) | 50 (40.9 to 61.5) | 20 (16.5 to 23.5) | 1031.2 (857.5 to 1205.2) | 68.8 (57.4 to 80.3) |
| Republic of Croatia | 56.4 (45.5 to 67.6) | 2926.8 (2344.8 to 3502.4) | 414.6 (324.6 to 506) | 17.5 (13 to 22.2) | 903 (672.7 to 1151.8) | 134.7 (99.7 to 174.9) | 4.8 (3.6 to 6) | 274.1 (200.5 to 351.4) | 98.7 (73.3 to 127.5) | 19.4 (15.9 to 23.3) | 960.4 (790.4 to 1146.9) | 72.5 (58.9 to 87) |
| Republic of Cuba | 172.6 (140.7 to 213.4) | 8647.6 (7087.3 to 10608.6) | 985.6 (791 to 1246.7) | 123.3 (100.2 to 148.1) | 6253.2 (5100.8 to 7527.6) | 648 (527.7 to 794.8) | 38.2 (30.1 to 47.8) | 1932.6 (1523.6 to 2405.1) | 283.6 (218.1 to 360) | 42.8 (33.8 to 52.4) | 2112.7 (1686.5 to 2587.1) | 134.3 (107.9 to 162.7) |
| Republic of Cyprus | 21.1 (15.8 to 27.1) | 1137.9 (848.3 to 1462) | 204.4 (150.9 to 262.4) | 3.6 (2.7 to 4.7) | 189.3 (141.5 to 246.5) | 26.5 (19.7 to 34.5) | 0.8 (0.5 to 1.4) | 46.1 (28.9 to 76.6) | 14 (8.7 to 22.7) | 4.2 (2.7 to 6.1) | 209.1 (135.5 to 299.7) | 14.9 (9.7 to 21.3) |
| Republic of C么te d'Ivoire | 419.2 (275.1 to 610.6) | 21386.6 (13972.7 to 31134.4) | 920 (595.7 to 1351) | 243.5 (154.5 to 364.1) | 12605.4 (7988.9 to 18836.9) | 664.4 (425.2 to 975.5) | 9.8 (5.5 to 14.6) | 504 (281.6 to 748.3) | 34.7 (18.8 to 51.4) | 52.4 (31.6 to 76.6) | 2821.4 (1700.7 to 4157.7) | 164 (102.7 to 240.5) |
| Republic of Djibouti | 27.7 (16.6 to 44) | 1390.8 (830.9 to 2187.2) | 59.2 (36 to 93.7) | 34 (19.8 to 54.9) | 1694.1 (987.5 to 2741.2) | 85.9 (50.1 to 140.1) | 1.1 (0.5 to 2) | 52.9 (26.6 to 101.3) | 3.7 (1.8 to 7.2) | 4.7 (2.2 to 7.9) | 242.2 (112.4 to 403.7) | 13.1 (6.2 to 21.8) |
| Republic of Ecuador | 239 (178.8 to 314.5) | 12116.1 (9071.8 to 15948.1) | 901.9 (650.2 to 1190.1) | 256.5 (188.9 to 339) | 13053.5 (9661.8 to 17419) | 1021.9 (750.8 to 1346.6) | 29.8 (21.8 to 40) | 1511.1 (1105.3 to 2013) | 168.4 (122.4 to 230.9) | 66.3 (49.7 to 86.6) | 3491.2 (2625 to 4548) | 222.2 (165.3 to 288.6) |
| Republic of El Salvador | 95.6 (69.1 to 132.9) | 4959.9 (3559.4 to 6904.5) | 583.3 (411.3 to 808.7) | 140.2 (101.4 to 181.8) | 7220.8 (5247.2 to 9369) | 768.8 (562.6 to 1010.9) | 7.4 (5.4 to 9.9) | 377 (274.1 to 503.5) | 45 (32 to 62.1) | 29.7 (19.3 to 39.7) | 1541.6 (993.2 to 2045.9) | 97.7 (64.3 to 129.8) |
| Republic of Equatorial Guinea | 28.3 (15.3 to 50) | 1443.5 (778.5 to 2511.3) | 73.5 (39.5 to 125.6) | 30.4 (15.6 to 52.3) | 1577.5 (810.4 to 2716.3) | 97.3 (49.4 to 167.5) | 0.9 (0.5 to 1.6) | 46.6 (23 to 78.7) | 4 (2 to 6.9) | 3.4 (1.6 to 6) | 181.5 (81.9 to 313.8) | 10.8 (5 to 18.8) |
| Republic of Estonia | 15.6 (12.2 to 19.1) | 798.4 (624.2 to 985.8) | 103.7 (81 to 128) | 7.6 (6.1 to 9.2) | 388.9 (314 to 470.3) | 49.3 (39.2 to 60.3) | 1.4 (1 to 1.7) | 76.3 (55.1 to 98) | 24.2 (17.5 to 31.7) | 5.2 (4.3 to 6.3) | 257.5 (212.2 to 310.2) | 16.3 (13.5 to 19.4) |
| Republic of Fiji | 39.4 (27.9 to 54.2) | 1982.8 (1411.2 to 2752.2) | 86.7 (60.9 to 120.9) | 27 (17.3 to 38.1) | 1364.2 (884.9 to 1908) | 86.5 (57.5 to 125.3) | 2.2 (1.4 to 3.4) | 111.2 (68.6 to 169.2) | 10.3 (6.3 to 15.6) | 1.7 (1.2 to 2.5) | 88.8 (60.4 to 126.1) | 7.3 (4.9 to 10.6) |
| Republic of Finland | 53.9 (48.4 to 60.2) | 2955.9 (2625.4 to 3331) | 532.5 (459.6 to 605.1) | 9.7 (8.4 to 11.2) | 518.4 (450.3 to 594.4) | 80.9 (68.4 to 96.2) | 3.4 (2.9 to 4) | 189.2 (160.3 to 225.6) | 55.5 (46.7 to 66.9) | 12.9 (11.1 to 14.8) | 656.8 (573 to 748.9) | 55.9 (48.4 to 63.7) |
| Republic of Ghana | 654.5 (449.8 to 921.7) | 33750.9 (23087.9 to 47740) | 1514 (1028.6 to 2117.1) | 688.4 (455.4 to 934.3) | 35915.6 (24017.4 to 48599.4) | 1997.5 (1339.6 to 2713.3) | 23.2 (14.3 to 38.6) | 1192.3 (734.7 to 1991.6) | 87 (51.7 to 147.3) | 61 (35 to 88.6) | 3267.3 (1854.1 to 4675.9) | 192.1 (111.4 to 275.4) |
| Republic of Guatemala | 157.8 (128.4 to 188) | 8102.1 (6610.6 to 9621.8) | 671 (543.5 to 807.1) | 281.5 (233.5 to 333.3) | 14347 (11883.5 to 16962.1) | 1184.6 (968.4 to 1406.7) | 22.6 (18.7 to 26.9) | 1140.6 (949.2 to 1348.3) | 97.4 (81 to 117.5) | 35.4 (29.2 to 41.6) | 1868.1 (1553 to 2185.3) | 112.3 (91.6 to 133.3) |
| Republic of Guinea | 161.4 (101.4 to 245.8) | 8162.1 (5128.2 to 12346.2) | 308.3 (195.5 to 463.7) | 427.7 (277.5 to 624.8) | 22399.4 (14615 to 32869.1) | 1057.8 (675.8 to 1515.3) | 7 (3.8 to 12) | 359.9 (193.4 to 614.8) | 20.8 (11.2 to 35.3) | 15.5 (7.7 to 23.6) | 832.7 (413.6 to 1276.6) | 46.3 (23.4 to 71.5) |
| Republic of Guinea-Bissau | 38.4 (24.9 to 54.6) | 1956.4 (1283.9 to 2751.6) | 70.4 (45.8 to 98.8) | 73.1 (49.8 to 100.9) | 3813.5 (2579.9 to 5210.7) | 172 (115.7 to 234.8) | 1.4 (0.9 to 2.1) | 70.5 (44.4 to 106.7) | 3.9 (2.4 to 6) | 3.1 (2 to 4.7) | 167.2 (108.9 to 247.3) | 9.2 (6.1 to 13.7) |
| Republic of Guyana | 22.7 (16 to 31.5) | 1130.3 (792.6 to 1561.8) | 60.5 (42.8 to 83.8) | 19 (12.9 to 27) | 972.7 (664.5 to 1383.4) | 58.5 (38.9 to 83.7) | 3.2 (2.2 to 4.5) | 162.8 (111.8 to 227.1) | 10.9 (7.4 to 15.6) | 6.2 (4.3 to 8.5) | 315.8 (219.3 to 434.5) | 17.8 (12.8 to 24.7) |
| Republic of Haiti | 366.9 (216.4 to 566.4) | 18316.1 (10823.8 to 28437.1) | 743.3 (450.1 to 1164.2) | 563.6 (367.3 to 799) | 29211.3 (19316.6 to 41275.4) | 1399.9 (933.7 to 2012.3) | 44.5 (25.7 to 77.3) | 2251.4 (1289.4 to 3851.6) | 111.3 (63.4 to 190.9) | 58.8 (34.7 to 122.3) | 3036.4 (1793.4 to 6493.5) | 158.5 (93 to 340.2) |
| Republic of Honduras | 115.6 (75.7 to 170.6) | 5753.1 (3719 to 8504.9) | 436.7 (284 to 648.7) | 179.1 (93.7 to 276.6) | 9036.8 (4720.9 to 13919.2) | 684.1 (359.8 to 1081.4) | 28.9 (16.7 to 46.5) | 1435.7 (827.3 to 2345.3) | 112.7 (65.1 to 185.2) | 65.2 (30.2 to 110.7) | 3428.4 (1559.6 to 5789.2) | 199.9 (86.7 to 343.4) |
| Republic of Iceland | 5 (4.3 to 5.7) | 267.1 (230.7 to 309.8) | 43.8 (36.9 to 50.5) | 0.8 (0.7 to 1) | 44.7 (36.2 to 53.3) | 7.1 (5.7 to 8.6) | 0.2 (0.2 to 0.2) | 10.8 (8.9 to 12.9) | 3.7 (3 to 4.5) | 1.1 (0.9 to 1.3) | 53.8 (45.8 to 63.6) | 4 (3.3 to 4.8) |
| Republic of India | 22806.4 (19651.4 to 26603.1) | 1161292.9 (999509.8 to 1360321.8) | 60765.1 (52296.5 to 71136) | 17069.7 (14433.8 to 19933.2) | 864022.6 (730092.4 to 1011428.9) | 51201.6 (43240.4 to 59774.4) | 550.9 (437.1 to 725.6) | 27943.6 (22238.2 to 36826.7) | 2512.5 (1983.3 to 3210.3) | 4077.1 (3327.4 to 4826.6) | 210107.1 (171622 to 247924.6) | 12322.2 (10099.5 to 14760.5) |
| Republic of Indonesia | 7330.1 (5048.3 to 10483.2) | 361952.4 (250192.2 to 513831.3) | 18805.7 (13093 to 26677.7) | 3255.9 (2373.7 to 4399.6) | 162576.2 (118508.1 to 219369.3) | 9597.8 (7021.7 to 13086.8) | 524.8 (275.9 to 782.9) | 26407.1 (13934.5 to 38678.6) | 2635.4 (1420.1 to 3858.9) | 1461.4 (914.4 to 2325.7) | 76261.1 (47714.5 to 121214.4) | 6612.3 (4107.3 to 10276.7) |
| Republic of Iraq | 782.4 (561.4 to 1055.1) | 40208.5 (29219.4 to 54777.2) | 4313.1 (3077.9 to 6015.3) | 78.5 (54.2 to 110.5) | 3932.2 (2766.3 to 5506.7) | 272.1 (192.4 to 389.4) | 24.4 (15.7 to 36.7) | 1278.7 (837.8 to 1933.1) | 223.3 (142.5 to 347.8) | 113.7 (74.8 to 173.1) | 5834.8 (3828 to 8877.6) | 371.9 (240.8 to 569.4) |
| Republic of Italy | 892.6 (853.7 to 937.4) | 47510.8 (44433.3 to 50780.3) | 8496.2 (7624.4 to 9313.4) | 156.2 (147.2 to 166) | 8054.1 (7568.2 to 8645) | 1204 (1087.9 to 1330.7) | 48.2 (45.1 to 51.7) | 2819.1 (2567.7 to 3111.9) | 1133.5 (1024.7 to 1235.4) | 202.2 (190.8 to 213.4) | 9923.6 (9325.2 to 10506.6) | 788.4 (721.2 to 854.1) |
| Republic of Kazakhstan | 267.5 (227.8 to 309.5) | 13447.7 (11525.6 to 15519.1) | 1064.7 (899.7 to 1250.7) | 227.1 (195.1 to 260.6) | 11526.9 (9865.8 to 13256.1) | 1030.9 (871 to 1200.4) | 31 (27.1 to 35.9) | 1619.2 (1412 to 1859.8) | 230.6 (198.4 to 267.7) | 98.4 (78.7 to 122) | 4922.5 (3959.6 to 6118.9) | 271.2 (216.7 to 334.1) |
| Republic of Kenya | 844.7 (554.3 to 1239.5) | 42947.1 (27976.8 to 63092.4) | 1944.2 (1279.4 to 2864.5) | 612.7 (436.8 to 839.8) | 31123.4 (22164.2 to 43036.2) | 1653.3 (1172.8 to 2299.7) | 21.4 (13.7 to 36.7) | 1089.4 (695.7 to 1886.4) | 80.3 (52.2 to 136.8) | 138.6 (81.1 to 194.5) | 7311.5 (4205.3 to 10424.5) | 420.7 (234.9 to 602.7) |
| Republic of Kiribati | 4.6 (3.1 to 6.6) | 233.7 (161.3 to 333.7) | 8.1 (5.6 to 11.5) | 7.1 (4.8 to 10.4) | 360.6 (243.3 to 521.9) | 17.7 (12 to 25.6) | 0.3 (0.1 to 0.5) | 15.8 (5.3 to 27.6) | 1 (0.3 to 1.8) | 0.1 (0 to 0.2) | 5.2 (2.4 to 8.1) | 0.4 (0.2 to 0.6) |
| Republic of Korea | 616.1 (505.6 to 734.3) | 33109.9 (27033.3 to 39822.3) | 5619.6 (4507.8 to 6854.1) | 187.4 (149.2 to 242.7) | 9797.5 (7925.8 to 12709.1) | 1429.2 (1125.3 to 1855) | 31.7 (18.9 to 46.7) | 1695.3 (1007.3 to 2472.5) | 380 (226 to 562.2) | 170.9 (125.4 to 208.5) | 8475.9 (6232.5 to 10252.8) | 573.5 (416.2 to 703) |
| Republic of Latvia | 28.8 (22.4 to 35.5) | 1425.4 (1111.1 to 1759.4) | 127.5 (98.7 to 160) | 11.5 (9.4 to 14.3) | 572.9 (464.7 to 702.2) | 42.6 (34.1 to 51.7) | 3.3 (2.5 to 4.4) | 178.9 (135.9 to 235.3) | 46 (34.4 to 61.2) | 13.2 (10.8 to 16.2) | 627.3 (516.8 to 769.7) | 28 (22.9 to 34.6) |
| Republic of Liberia | 73.5 (46.4 to 112.5) | 3721.2 (2362.5 to 5674.5) | 161.6 (101.5 to 244.1) | 118.9 (77.3 to 171.8) | 6211.1 (3938.8 to 8985.2) | 331.5 (208.7 to 482.8) | 3 (1.8 to 4.7) | 151 (90.2 to 237.3) | 10.6 (6.4 to 16.6) | 7.4 (4.3 to 11.2) | 397.9 (234.8 to 586.1) | 23.2 (13.8 to 33.7) |
| Republic of Lithuania | 42.9 (35.1 to 51) | 2144.3 (1756.7 to 2547.1) | 230.5 (185 to 277.4) | 19.8 (15.7 to 23.4) | 999.7 (795.5 to 1183.9) | 114.5 (90.8 to 138.8) | 5 (3.6 to 6.5) | 260.8 (192.9 to 338.5) | 57.8 (42.2 to 76) | 16.7 (13.3 to 20.5) | 804.6 (644.5 to 978.1) | 44.2 (35.5 to 53.6) |
| Republic of Madagascar | 489.2 (337.3 to 698.5) | 25061.3 (17379.2 to 35725.1) | 967.5 (679.4 to 1402.5) | 790.6 (495.8 to 1149) | 40556.1 (25328.6 to 58700.2) | 1935.9 (1196.1 to 2880.5) | 19.7 (12.4 to 30.6) | 1007.8 (638.5 to 1567.7) | 61 (39 to 95.4) | 87.4 (52.3 to 130.7) | 4673.9 (2847.8 to 6947.2) | 261.3 (159 to 390.1) |
| Republic of Malawi | 282.8 (185.5 to 402.7) | 14676.6 (9605 to 20969.5) | 578.4 (382.2 to 805.2) | 622.9 (382.9 to 915.2) | 32977 (20307.6 to 48655.5) | 1644.2 (1011.3 to 2411.8) | 8 (4.6 to 12.9) | 412.4 (237.4 to 670.8) | 25.8 (14.9 to 41) | 41.7 (16.9 to 67.5) | 2269.7 (895.5 to 3709.1) | 130.2 (51.6 to 213.3) |
| Republic of Maldives | 4.1 (2.9 to 5.7) | 210.1 (148.9 to 294) | 17.1 (12.1 to 23.7) | 1.3 (0.9 to 1.7) | 67.7 (48.8 to 88.3) | 6 (4.4 to 8.1) | 0.1 (0.1 to 0.2) | 6.5 (4.2 to 11.5) | 1.1 (0.7 to 2) | 1.8 (1.1 to 2.9) | 96 (61.3 to 151) | 9.5 (6.2 to 14.4) |
| Republic of Mali | 245.2 (161.2 to 364.4) | 12380.2 (8131.7 to 18350.8) | 492.6 (327.4 to 719.9) | 403.4 (278.4 to 566.4) | 21590.9 (14934 to 30048.8) | 1074.8 (729.8 to 1479) | 8.5 (5 to 13.8) | 432.8 (253.5 to 699.1) | 26.8 (15.3 to 42.7) | 12.9 (7.1 to 18.2) | 698 (388 to 975.2) | 39.7 (22.7 to 56) |
| Republic of Malta | 8.5 (7.5 to 9.6) | 444.3 (389.7 to 506.1) | 61.8 (52.7 to 71.9) | 1 (0.8 to 1.2) | 52.1 (43.4 to 62.5) | 7 (5.8 to 8.3) | 0.4 (0.3 to 0.4) | 20.4 (17.1 to 24.6) | 5.7 (4.6 to 7) | 2 (1.7 to 2.3) | 97.2 (82.6 to 113.6) | 6.8 (5.7 to 8) |
| Republic of Mauritius | 38.6 (33.2 to 43) | 1932.9 (1657.8 to 2161.2) | 141.5 (119.4 to 161.6) | 11.2 (9.8 to 12.4) | 564.2 (488.7 to 629.1) | 44.4 (38.6 to 49.7) | 4 (3.4 to 4.4) | 204 (177.5 to 225.7) | 30.4 (26.3 to 34.5) | 9.3 (8.1 to 10.4) | 485.7 (421.1 to 535.7) | 46 (39.6 to 51.2) |
| Republic of Moldova | 64.7 (53.9 to 78.4) | 3247.6 (2683.4 to 3931) | 283.9 (228.2 to 355.5) | 47.4 (40.6 to 54.6) | 2381 (2044.1 to 2744.8) | 184 (156 to 216.7) | 4.9 (4.3 to 5.7) | 258.3 (221.8 to 300.7) | 53.7 (45.2 to 63.9) | 14.6 (12.2 to 17.2) | 701.4 (588.2 to 823.8) | 35.6 (29.6 to 41.5) |
| Republic of Mozambique | 474.5 (296.8 to 696.2) | 25070.6 (15659 to 36319.6) | 905.5 (568.5 to 1307.8) | 981.5 (561.9 to 1666.4) | 50249.8 (29231.8 to 85386.4) | 2281.5 (1308.9 to 4024.3) | 23.5 (11.7 to 43.3) | 1197 (598.3 to 2201.3) | 67.7 (33.7 to 122.3) | 98 (51 to 157.2) | 5280.2 (2749.6 to 8387.8) | 292.5 (153.4 to 457.7) |
| Republic of Namibia | 68.5 (42.9 to 103.5) | 3407 (2115.3 to 5188.6) | 164.8 (102.3 to 246.5) | 44.9 (26.8 to 67.8) | 2293.9 (1364.5 to 3492.5) | 132.2 (77.6 to 204.9) | 1.6 (0.9 to 2.7) | 81 (45.7 to 134) | 6.6 (3.7 to 11) | 5.7 (3.1 to 9.5) | 294.4 (163 to 498.6) | 16.9 (9.5 to 28.2) |
| Republic of Nauru | 0.5 (0.3 to 0.8) | 24.6 (13.4 to 40.1) | 1 (0.6 to 1.7) | 0.4 (0.2 to 0.5) | 18 (10.2 to 26.6) | 1.1 (0.6 to 1.6) | 0 (0 to 0.1) | 1.8 (0.7 to 3.2) | 0.2 (0.1 to 0.3) | 0 (0 to 0.1) | 1.6 (0.7 to 3.2) | 0.1 (0.1 to 0.3) |
| Republic of Nicaragua | 64.1 (48.9 to 83.9) | 3344.1 (2518.7 to 4362.5) | 359.5 (272.2 to 467.5) | 102 (76.2 to 134.4) | 5314.3 (3978.6 to 7012.7) | 541.6 (408.3 to 722.5) | 3.1 (2.1 to 4.6) | 160.4 (108 to 233.7) | 17.6 (11.8 to 25.6) | 16.7 (11.4 to 22) | 876.6 (606.3 to 1141.7) | 55.4 (38.1 to 70.7) |
| Republic of Niue | 0.1 (0 to 0.1) | 3.4 (2.6 to 4.6) | 0.2 (0.1 to 0.2) | 0 (0 to 0) | 1.3 (1 to 1.7) | 0.1 (0.1 to 0.1) | 0 (0 to 0) | 0.2 (0.1 to 0.4) | 0 (0 to 0) | 0 (0 to 0) | 0.3 (0.2 to 0.5) | 0 (0 to 0) |
| Republic of Palau | 0.8 (0.6 to 1) | 39.2 (28.7 to 51.5) | 2.1 (1.5 to 2.8) | 0.6 (0.4 to 0.9) | 30.8 (21.3 to 42.7) | 2.3 (1.6 to 3.1) | 0 (0 to 0) | 0.3 (0.2 to 0.5) | 0 (0 to 0.1) | 0 (0 to 0) | 0.6 (0.4 to 0.8) | 0.1 (0 to 0.1) |
| Republic of Panama | 72.3 (55.5 to 89.3) | 3877.4 (2972.7 to 4822.6) | 567.2 (442.1 to 723.5) | 57.3 (43.7 to 71.4) | 3040 (2326.3 to 3782.6) | 381.5 (292.3 to 482.8) | 5.5 (4.2 to 7) | 283.4 (215.8 to 357.6) | 38.5 (28.7 to 49.7) | 16.7 (13.3 to 20.5) | 875.7 (704.4 to 1068.9) | 57.8 (46.4 to 70.1) |
| Republic of Paraguay | 122.5 (85.4 to 172.9) | 6235.9 (4323.3 to 8810.2) | 453.9 (310.6 to 651.3) | 157 (113.3 to 222.8) | 8126.1 (5830.4 to 11472.3) | 642.3 (447.6 to 920.9) | 7.5 (4.7 to 11.4) | 380.4 (239.9 to 582.5) | 41.2 (25.9 to 64.1) | 18.8 (12.4 to 26.4) | 984.3 (655.3 to 1377) | 62 (40.9 to 86.2) |
| Republic of Peru | 465.4 (313.3 to 684) | 23752.7 (16077.7 to 34626.9) | 2130.8 (1447.5 to 3017.1) | 591.9 (408.7 to 805.6) | 30104.8 (20859.5 to 40865.5) | 2685.2 (1830.7 to 3654.3) | 48.6 (31 to 69.2) | 2485 (1567 to 3580.2) | 334.5 (213.5 to 487.4) | 148.5 (101.5 to 212.9) | 7736.1 (5262.3 to 11068.7) | 504.4 (333.9 to 697.7) |
| Republic of Poland | 640.4 (553 to 723.4) | 32708.2 (28242.3 to 36968.6) | 3738.8 (3203.5 to 4317.2) | 216.9 (186.2 to 244.2) | 10819.2 (9309.8 to 12201.6) | 958.6 (816.2 to 1098.8) | 49.5 (42.5 to 56.2) | 2601.9 (2232.2 to 2968) | 552.3 (467.1 to 634.9) | 231 (199.7 to 260.1) | 11333.4 (9819.9 to 12771.1) | 631.7 (542.3 to 720.7) |
| Republic of Rwanda | 256.9 (167.5 to 375.8) | 13173.2 (8616.2 to 19369.2) | 544.1 (352.2 to 790.7) | 327.4 (204.6 to 486.9) | 16722 (10428.8 to 24776.8) | 845.5 (530.4 to 1231) | 8.9 (5.2 to 14.9) | 454.6 (265.7 to 756) | 30.2 (17.7 to 51.1) | 55.7 (31.2 to 83.3) | 2976.3 (1667.6 to 4518.1) | 170.1 (95.2 to 260.2) |
| Republic of San Marino | 0.4 (0.2 to 0.6) | 18.9 (10.1 to 30.2) | 3.1 (1.6 to 5) | 0 (0 to 0.1) | 2.1 (1.1 to 3.6) | 0.3 (0.1 to 0.5) | 0 (0 to 0) | 0.3 (0.1 to 0.5) | 0.1 (0 to 0.1) | 0.1 (0 to 0.1) | 2.7 (1.5 to 4.4) | 0.2 (0.1 to 0.3) |
| Republic of Senegal | 201.2 (138.1 to 297.5) | 10206.6 (7012.8 to 14975.9) | 437.9 (298.5 to 645.8) | 277 (192.8 to 389) | 14414.5 (10052 to 20240.1) | 763.2 (532.7 to 1068.5) | 7.7 (4.6 to 12.6) | 388.9 (233.2 to 644.6) | 26.9 (16 to 44.7) | 20.1 (11 to 29.6) | 1083.6 (596 to 1581.2) | 63.3 (35.1 to 95.1) |
| Republic of Serbia | 175.5 (132.4 to 225) | 8895.6 (6744.3 to 11425.3) | 1000.5 (744.8 to 1281.9) | 89.6 (66 to 117.7) | 4518.5 (3317.6 to 5938.9) | 491.1 (370.7 to 651.2) | 10.9 (6.4 to 16.9) | 560.4 (325.9 to 867.6) | 101 (58.8 to 159.1) | 46.1 (31.5 to 63.7) | 2238.9 (1520.7 to 3084.2) | 123 (83.3 to 169.9) |
| Republic of Seychelles | 2.8 (2.2 to 3.4) | 140.3 (113.3 to 171.9) | 9.5 (7.6 to 11.5) | 2 (1.5 to 2.4) | 100.1 (78.5 to 123) | 7.6 (5.9 to 9.3) | 0.2 (0.1 to 0.2) | 8.7 (6.3 to 12) | 1.2 (0.8 to 1.6) | 0.9 (0.6 to 1.1) | 44.9 (30.4 to 57.2) | 4.3 (2.9 to 5.4) |
| Republic of Sierra Leone | 104.6 (65.4 to 151.9) | 5351 (3355 to 7838.4) | 215.6 (138.3 to 308.8) | 174.3 (115.5 to 243.1) | 9225.5 (6104 to 13002.9) | 465.4 (308.8 to 651.6) | 3.4 (2.2 to 5.1) | 173.2 (109.8 to 266.5) | 10.9 (6.8 to 16.7) | 9.2 (5.5 to 13.2) | 500.5 (299.5 to 723.3) | 28.9 (17.6 to 41.7) |
| Republic of Singapore | 69.1 (62.6 to 76.6) | 3706.1 (3329.8 to 4121.6) | 609.6 (535.3 to 700.5) | 15.6 (13.4 to 17.9) | 808.8 (695.3 to 928.5) | 112.9 (97.2 to 130.8) | 3.7 (3.1 to 4.3) | 194.6 (164.5 to 227.8) | 42.1 (35.2 to 49.7) | 19.3 (16.9 to 22) | 958 (845.9 to 1079.9) | 64.7 (56.6 to 74) |
| Republic of Slovenia | 18.4 (14.1 to 23.4) | 982 (757.8 to 1254.9) | 164 (124.7 to 213.9) | 5.5 (4.2 to 6.8) | 331 (254.7 to 419.6) | 129.4 (97.6 to 161.7) | 2 (1.5 to 2.6) | 110.3 (85.1 to 145.2) | 32.1 (24.4 to 42) | 6.4 (4.9 to 8.1) | 313.7 (243.1 to 397) | 18.5 (14.3 to 23) |
| Republic of South Africa | 1478.6 (1245.2 to 1729.5) | 74233.5 (62387.2 to 86931.4) | 3919.8 (3281.3 to 4596.6) | 2073.1 (1725.8 to 2411.9) | 105019.7 (87603.5 to 122329.7) | 6514.5 (5444 to 7630) | 42.6 (33.9 to 62.2) | 2140.2 (1686.8 to 3157.1) | 195.3 (153.8 to 284.1) | 204.8 (165.2 to 248) | 10464.4 (8451.7 to 12722.2) | 599.6 (488.3 to 729) |
| Republic of South Sudan | 114.9 (75.8 to 168.7) | 5788.6 (3841.7 to 8450.1) | 225.3 (149.5 to 327.5) | 291.6 (191.6 to 439.6) | 14742.6 (9688.7 to 22148.2) | 694.6 (450.3 to 1037.6) | 7 (3.9 to 11.1) | 350.9 (197.2 to 550.8) | 21.6 (12.1 to 34.2) | 24.4 (14.5 to 38.3) | 1274.2 (760.7 to 1985.3) | 69.3 (41.6 to 107.9) |
| Republic of Sudan | 411 (215.6 to 695) | 21329.8 (11153.9 to 35826.6) | 1551.8 (824.8 to 2624.1) | 139.9 (76.8 to 221.7) | 7296.1 (3996.4 to 11617.2) | 408.1 (222 to 658.1) | 21.1 (11.2 to 33.1) | 1114.1 (582.9 to 1739.3) | 127.9 (66.7 to 202.1) | 65.5 (35 to 115.2) | 3496.3 (1876.8 to 6154.1) | 214.3 (113.1 to 370.8) |
| Republic of Suriname | 12 (8.7 to 16) | 605.7 (437 to 799) | 36.4 (26.1 to 48.4) | 15.1 (10.7 to 20.4) | 774.8 (544.6 to 1042.4) | 51.1 (35.8 to 69.3) | 1 (0.7 to 1.5) | 52.3 (35.2 to 74.3) | 4 (2.7 to 5.7) | 3.5 (2.5 to 4.6) | 178.6 (129 to 235.4) | 10.4 (7.3 to 13.6) |
| Republic of Tajikistan | 125.8 (70.1 to 204) | 6422.6 (3536.3 to 10424.3) | 333.3 (179.3 to 537.3) | 41.6 (25.7 to 63.4) | 2151 (1329.7 to 3297.8) | 141.1 (86.7 to 217.5) | 14 (6.6 to 28.6) | 727.1 (338.3 to 1507.3) | 63.8 (29.7 to 130.7) | 16.1 (10 to 22.9) | 846.9 (530.9 to 1197.6) | 44.6 (27.4 to 65.5) |
| Republic of Trinidad and Tobago | 46.1 (33.5 to 61.6) | 2317.5 (1689.5 to 3092.5) | 178.1 (126.3 to 239.1) | 29.7 (20.8 to 40.3) | 1528.1 (1076.8 to 2062.3) | 122.4 (86.6 to 169.5) | 5.6 (3.8 to 7.7) | 283.6 (192.3 to 388.6) | 28 (19.3 to 38.1) | 10.9 (7.7 to 14.6) | 549.4 (390.6 to 735) | 32.8 (23.4 to 43.5) |
| Republic of Tunisia | 177.9 (119.9 to 248.3) | 9303 (6353.6 to 13188.5) | 1188.9 (804 to 1665.1) | 48.1 (32.4 to 66.8) | 2464.3 (1653 to 3380.7) | 198.6 (131.1 to 277.8) | 4.9 (3 to 7.6) | 263 (162.7 to 404.8) | 54.7 (33.7 to 85.8) | 32.9 (21.8 to 47.4) | 1656.9 (1109.4 to 2352) | 106.1 (69.5 to 154.5) |
| Republic of Turkey | 1399.9 (1088.2 to 1779.6) | 73997.1 (57450.5 to 94312.9) | 9703.9 (7393.8 to 12376.6) | 184.5 (131.6 to 250.5) | 9304.5 (6640.8 to 12582.8) | 747.2 (526.8 to 1001) | 77.8 (48.4 to 108.8) | 4179.4 (2542.6 to 5902) | 890.2 (554 to 1257.2) | 322.8 (208 to 420.4) | 16381.6 (10538.7 to 21232.3) | 1069.5 (696.7 to 1401) |
| Republic of Uganda | 719.5 (473.6 to 1030.6) | 36790.1 (23951.3 to 52304.2) | 1535.1 (1006.8 to 2180.8) | 867.4 (569.2 to 1201.1) | 45293.2 (29779.3 to 62927.8) | 2344.6 (1527.2 to 3259.5) | 35.3 (22.2 to 54.1) | 1829.4 (1142.8 to 2803.3) | 121.1 (74.5 to 183.5) | 153.2 (87.2 to 228.8) | 8408.1 (4799.8 to 12502.1) | 496.6 (274.3 to 737.3) |
| Republic of Uzbekistan | 545.9 (437.5 to 677) | 27947.7 (22326.2 to 34870.8) | 1708.4 (1352.7 to 2163.9) | 356.2 (282.8 to 434.1) | 17775.6 (14060.4 to 21767.6) | 1276.2 (1009.6 to 1552.2) | 49.6 (35.9 to 64.5) | 2568.4 (1851.6 to 3315) | 275.3 (198.2 to 361.9) | 107 (82 to 136.9) | 5522 (4222.2 to 7109.1) | 297.6 (225.6 to 380.8) |
| Republic of Vanuatu | 7.5 (5.1 to 10) | 374.1 (257.6 to 502.1) | 14.3 (10 to 19.3) | 5.8 (4.1 to 8.2) | 294.3 (205.5 to 412.6) | 16 (11.1 to 22.6) | 0.6 (0.3 to 1) | 30.3 (15.1 to 48.6) | 2.3 (1.2 to 3.7) | 0.4 (0.2 to 0.8) | 22.6 (10.9 to 41) | 1.8 (0.9 to 3.2) |
| Republic of Yemen | 269.5 (171.5 to 409.3) | 13603.5 (8715.2 to 20693.6) | 868.6 (552.8 to 1288.5) | 106.7 (61.8 to 165.6) | 5392.5 (3115.3 to 8356.8) | 269.7 (155.7 to 424.5) | 12.1 (7.2 to 19) | 618.7 (367.4 to 976.3) | 62.8 (36.6 to 102) | 36.4 (18 to 62.2) | 1866.3 (908.7 to 3181.7) | 105 (49.3 to 183.1) |
| Republic of Zambia | 578.4 (280.8 to 993) | 30429.1 (14583.4 to 52710.3) | 1227.8 (592.2 to 2087.4) | 578.3 (338.4 to 1136.5) | 29888 (17602.9 to 59290.8) | 1514.4 (878.4 to 2987.8) | 19.1 (7.8 to 46.9) | 982.2 (397.8 to 2438.2) | 63.8 (25.6 to 154.4) | 71.1 (39.4 to 116.8) | 3854.5 (2108.7 to 6321) | 222.5 (120 to 361.9) |
| Republic of Zimbabwe | 418.3 (282.9 to 623.9) | 20963.4 (14211.2 to 31078.5) | 817.6 (562.9 to 1239.3) | 711.7 (451.2 to 1034.7) | 36002.7 (22810.5 to 52108.1) | 1706.8 (1089 to 2478) | 28.3 (13.8 to 48.1) | 1422.3 (685.5 to 2404.7) | 87.3 (42.8 to 145.7) | 74.6 (43.4 to 111.7) | 3918.6 (2305.8 to 5795.3) | 213.3 (128.6 to 311.6) |
| Republic of the Congo | 166.9 (93.4 to 275.3) | 8321.2 (4665.3 to 13705.1) | 356.9 (195.6 to 588.9) | 211.2 (110.9 to 336) | 10661.9 (5599.9 to 16838.4) | 550.1 (283.9 to 866.1) | 6.1 (3.5 to 10) | 301 (176.6 to 490.8) | 21.1 (12.3 to 34.6) | 16.6 (10.3 to 25.8) | 854 (530 to 1313.7) | 46.8 (28.9 to 71.1) |
| Republic of the Gambia | 16.3 (11 to 23.4) | 823.4 (557.9 to 1182.3) | 35.7 (24 to 51.3) | 43.9 (27.7 to 64.8) | 2338.9 (1456.2 to 3447.6) | 126.1 (76.5 to 184.4) | 1.1 (0.7 to 1.7) | 56.7 (34 to 88.1) | 3.9 (2.3 to 6) | 2.5 (1.4 to 3.9) | 134.6 (75 to 210.9) | 7.9 (4.4 to 12.6) |
| Republic of the Marshall Islands | 2.4 (1.4 to 3.8) | 120.3 (68 to 191.6) | 4.7 (2.7 to 7.5) | 1.8 (1 to 2.6) | 90.4 (52.2 to 133.2) | 5 (2.9 to 7.4) | 0.2 (0.1 to 0.5) | 10.8 (4.1 to 23.4) | 0.8 (0.3 to 1.8) | 0.2 (0.1 to 0.3) | 8.8 (4.1 to 16.3) | 0.7 (0.3 to 1.3) |
| Republic of the Niger | 127.5 (77 to 191) | 6446.1 (3896.5 to 9742) | 241.1 (144.4 to 368.1) | 335.9 (219.1 to 520.2) | 17690.8 (11491.2 to 27607.2) | 818.2 (530.8 to 1264.4) | 5.9 (3.7 to 9.6) | 299 (186.2 to 488.8) | 17.1 (10.4 to 27.9) | 13.4 (7.8 to 20.6) | 730.5 (437.6 to 1138.6) | 41.3 (25 to 64.2) |
| Republic of the Philippines | 3306.3 (2508.8 to 4273.1) | 165353.5 (125689.5 to 213134.5) | 8592.6 (6596.7 to 11051.7) | 1131 (845.4 to 1465.8) | 57663.1 (43031.2 to 74797.8) | 3505.9 (2573.9 to 4625.3) | 181.8 (119.3 to 238) | 9312 (6150.9 to 12282.1) | 922.3 (609.2 to 1209) | 710.9 (464.6 to 941.5) | 37975.9 (24579.4 to 50135) | 3451.9 (2178.9 to 4523) |
| Republic of the Union of Myanmar | 1599.5 (1132.3 to 2182.8) | 81095.3 (57291 to 110287.7) | 3908.2 (2774.7 to 5348.6) | 633.2 (442.3 to 932.8) | 32098.4 (22440.6 to 46722) | 1825.5 (1272.3 to 2567.8) | 97.8 (54.5 to 148.5) | 4956.5 (2713.6 to 7485.6) | 453.6 (253.7 to 692.7) | 299.6 (188.3 to 454) | 15784.2 (9920.9 to 24497.2) | 1367.8 (839.4 to 2131.8) |
| Romania | 360.3 (302.1 to 429) | 18040.4 (15140.2 to 21431.6) | 1780.4 (1460.1 to 2161.1) | 291.4 (234.4 to 354.5) | 14485.7 (11742.9 to 17519.8) | 1406.7 (1128.2 to 1735) | 28 (22.9 to 33.9) | 1443.3 (1188.1 to 1756.1) | 260.3 (208.5 to 316.8) | 100.1 (81.5 to 118.7) | 4866.2 (3993.5 to 5752.1) | 273.5 (223.5 to 319.3) |
| Russian Federation | 2795.1 (2446.2 to 3113.2) | 142254.6 (123905.2 to 158900.9) | 13923.4 (12178 to 15507.7) | 2200.5 (1919.2 to 2457.7) | 113367.3 (99226.6 to 127003.1) | 10665.6 (9301 to 11894.3) | 375.4 (325.7 to 423.7) | 20401.3 (17761.6 to 23221) | 4984.6 (4324.2 to 5621.7) | 918.6 (809.6 to 1031.8) | 45233.1 (39827.7 to 50858.2) | 2710.7 (2399.7 to 3034.2) |
| Saint Kitts and Nevis | 1.4 (1 to 1.8) | 67.1 (50.1 to 86.1) | 5.1 (3.8 to 6.6) | 0.9 (0.7 to 1.2) | 44.3 (33.1 to 58.5) | 3.4 (2.4 to 4.4) | 0.2 (0.1 to 0.2) | 7.7 (5.8 to 10) | 0.8 (0.6 to 1) | 0.3 (0.2 to 0.3) | 13.2 (10.1 to 17.2) | 0.8 (0.6 to 1) |
| Saint Lucia | 5.6 (4.4 to 7) | 278.8 (221.6 to 347.9) | 21.5 (16.7 to 26.9) | 3.8 (3 to 4.9) | 194.4 (149.9 to 246.9) | 15.3 (11.7 to 19.6) | 0.6 (0.5 to 0.7) | 28.6 (22.8 to 35) | 2.8 (2.3 to 3.5) | 1.4 (1.1 to 1.7) | 68.2 (54 to 83.4) | 4.1 (3.2 to 5) |
| Saint Vincent and the Grenadines | 4.3 (3.6 to 5.2) | 214.3 (178.6 to 257.7) | 14.7 (12.1 to 18) | 3.8 (3.2 to 4.5) | 191.6 (161 to 226.5) | 13.7 (11.5 to 16.2) | 0.4 (0.3 to 0.5) | 19.7 (13.1 to 25.4) | 1.7 (1.1 to 2.3) | 0.9 (0.7 to 1) | 43.6 (36.8 to 52.4) | 2.6 (2.1 to 3.1) |
| Slovak Republic | 84.7 (62.7 to 109.2) | 4298.2 (3192.7 to 5553.4) | 465.9 (342.7 to 598.1) | 43 (32.1 to 55.5) | 2194.1 (1632.4 to 2832) | 240.9 (176 to 307) | 10.2 (6.1 to 16) | 530.2 (310.9 to 826.5) | 93.8 (54.5 to 148.9) | 30.4 (21.1 to 40.9) | 1489 (1045.7 to 1965.4) | 85.6 (60.7 to 115.2) |
| Socialist Republic of Viet Nam | 1566.9 (1098.5 to 2192.6) | 79158.8 (55710.8 to 110354.1) | 5978.7 (4230.5 to 8318.6) | 877.6 (622.8 to 1230.8) | 44194.1 (31601.5 to 61497.3) | 3587.6 (2581.7 to 4923.3) | 45.4 (28 to 67.7) | 2338.4 (1451.7 to 3458.8) | 365.8 (226.4 to 547.7) | 199.2 (125.1 to 298.5) | 10112.6 (6343.8 to 14743.8) | 911.8 (584.5 to 1328.4) |
| Solomon Islands | 19.4 (12.5 to 29.3) | 962.3 (620.9 to 1445.8) | 36.6 (23.2 to 55.1) | 18.7 (12.4 to 27.8) | 932.9 (621.8 to 1382.8) | 49.7 (33.1 to 73.3) | 1.7 (0.8 to 2.8) | 82.7 (40.6 to 141.5) | 6.1 (2.9 to 10.4) | 1.4 (0.7 to 2.4) | 73.2 (36.5 to 123.6) | 5.6 (2.8 to 9.2) |
| State of Eritrea | 148.7 (94.8 to 213.5) | 7451.9 (4778 to 10747.3) | 276 (173.9 to 396.1) | 257.4 (154.7 to 390.6) | 12802.7 (7696.3 to 19425.5) | 571.1 (351.1 to 882.1) | 6.3 (3.6 to 10.8) | 310.7 (175 to 544.2) | 17.9 (10.3 to 30.6) | 24.8 (15 to 38.3) | 1287.3 (785.3 to 2005.2) | 68.4 (40.6 to 106.3) |
| State of Israel | 126.5 (116.2 to 138.4) | 6688.6 (6119.8 to 7387.5) | 937.3 (828.3 to 1054.7) | 16.9 (13.9 to 20.2) | 887.3 (730.8 to 1052.8) | 114.9 (94.5 to 137.9) | 3.7 (3.1 to 4.4) | 203.2 (168.3 to 244.7) | 54 (43.5 to 64.9) | 19.2 (16.4 to 22.4) | 958 (829.3 to 1113.3) | 68.1 (58.9 to 79.5) |
| State of Kuwait | 64.8 (55.2 to 75.7) | 3597.5 (3040.1 to 4267.5) | 641.2 (531.6 to 762.7) | 6 (4.8 to 7.5) | 309.1 (252.4 to 386) | 31.7 (25.9 to 39.3) | 6.8 (5.5 to 8.4) | 387.3 (311.8 to 471.9) | 110.7 (87.7 to 135.5) | 12.9 (10.5 to 16.1) | 661.8 (540.5 to 814.3) | 46.1 (37.7 to 55.5) |
| State of Libya | 131 (89.3 to 194) | 6686.9 (4600.1 to 9972.6) | 690 (461.7 to 1049.3) | 72.4 (49.1 to 102.3) | 3678.4 (2502.9 to 5242.8) | 253.9 (171.9 to 364.2) | 7.6 (4.5 to 11.8) | 396 (241.2 to 617.1) | 67 (40.4 to 106.3) | 34.8 (22.8 to 51.2) | 1733.1 (1153.2 to 2564.7) | 104.7 (71 to 149.7) |
| State of Qatar | 31.9 (21.4 to 46.2) | 1801.4 (1173.5 to 2622.1) | 314 (210.7 to 454.1) | 2.6 (1.8 to 3.7) | 136.7 (94.3 to 195.1) | 14.5 (10 to 20.5) | 1.2 (0.7 to 2.2) | 69.4 (41 to 128.2) | 19.1 (11.4 to 35.3) | 6 (3.5 to 9.7) | 314.7 (186.4 to 514.4) | 22.7 (13.6 to 36.4) |
| Sultanate of Oman | 13 (9.1 to 18) | 700 (491.4 to 973.1) | 95.8 (66.6 to 134.3) | 6.2 (4.4 to 8.8) | 332.6 (232.2 to 465.4) | 29.6 (20.7 to 41.1) | 0.4 (0.2 to 0.7) | 22.6 (13.4 to 39.6) | 5 (3 to 8.8) | 3.3 (2.1 to 5.1) | 171.6 (106.6 to 267.2) | 11.5 (7.2 to 17.8) |
| Swiss Confederation | 80 (72.6 to 89.1) | 4304.6 (3881 to 4822.7) | 723.5 (629.2 to 819.1) | 16.6 (14.4 to 18.9) | 884.5 (768.2 to 1005) | 138.2 (117.2 to 160.4) | 4.7 (4 to 5.6) | 267.7 (225.1 to 321.4) | 88.6 (73.9 to 106.6) | 13.8 (11.6 to 16.3) | 693.6 (588.4 to 819.3) | 54 (45.8 to 64) |
| Syrian Arab Republic | 217.6 (153.9 to 307.3) | 11274.4 (8177.2 to 15889.4) | 1300 (927.9 to 1826.6) | 25.7 (16.8 to 36.7) | 1295.9 (838 to 1842.4) | 94.6 (61.3 to 135.8) | 9.2 (5.9 to 14.2) | 482.4 (310.7 to 738.8) | 91 (59.1 to 140.8) | 26.9 (17.4 to 39.7) | 1372.5 (888 to 2014.9) | 88.4 (57.3 to 130.4) |
| Taiwan (Province of China) | 466.8 (413 to 523.2) | 24044.7 (21220.9 to 26824.5) | 3235.9 (2796.8 to 3722) | 109.6 (93.9 to 128) | 5670.4 (4857.1 to 6612.4) | 691.6 (573.9 to 824.8) | 26.5 (22.4 to 31) | 1463.1 (1223.4 to 1720.8) | 414.1 (341.1 to 487.6) | 102.6 (85.3 to 119.9) | 5228 (4399.9 to 6128.6) | 573.6 (476.4 to 669.2) |
| Togolese Republic | 135.6 (86.3 to 198.7) | 6869.2 (4384.3 to 10133.5) | 291.4 (186.9 to 429.1) | 189.2 (117 to 265.8) | 9827.9 (6092.7 to 13754.8) | 514.2 (318.9 to 721.2) | 4.4 (2.8 to 6.8) | 224.1 (141.3 to 343.3) | 15.3 (9.5 to 23.9) | 12 (6.9 to 18.8) | 637.8 (367.3 to 993.7) | 36.3 (21.2 to 55.8) |
| Tokelau | 0.1 (0 to 0.1) | 2.9 (2.2 to 3.9) | 0.2 (0.1 to 0.2) | 0 (0 to 0) | 1.4 (1 to 1.9) | 0.1 (0.1 to 0.1) | 0 (0 to 0) | 0.2 (0.1 to 0.3) | 0 (0 to 0) | 0 (0 to 0) | 0.2 (0.1 to 0.3) | 0 (0 to 0) |
| Turkmenistan | 94 (69.3 to 128.8) | 4729.8 (3480.8 to 6466.3) | 290.4 (212.4 to 404.3) | 57 (42.2 to 76.5) | 2896.4 (2142.9 to 3903) | 211.2 (155 to 283) | 5.3 (3.9 to 7.1) | 272.8 (204.4 to 369) | 29 (21.2 to 39.1) | 24.1 (17.6 to 33.8) | 1251.7 (915.5 to 1747.2) | 68.1 (49.4 to 93.1) |
| Tuvalu | 0.4 (0.3 to 0.6) | 18.8 (12.7 to 27.7) | 0.8 (0.6 to 1.2) | 0.2 (0.2 to 0.4) | 12.6 (8.3 to 17.9) | 0.8 (0.5 to 1.1) | 0 (0 to 0.1) | 1.4 (0.7 to 2.5) | 0.1 (0.1 to 0.2) | 0 (0 to 0) | 1.4 (0.7 to 2.3) | 0.1 (0.1 to 0.2) |
| Ukraine | 853.1 (486.2 to 1334.2) | 42325.1 (24135 to 65998.7) | 2925.3 (1653.4 to 4641.5) | 239.7 (132.8 to 379.6) | 12067.8 (6661.8 to 19023.3) | 846.3 (465.2 to 1351.7) | 114.6 (65.4 to 181.8) | 5820.8 (3295.5 to 9175.3) | 862.6 (488.1 to 1363.2) | 301.1 (166 to 474.3) | 14738.6 (8129.7 to 23143.9) | 797.6 (448.8 to 1255.6) |
| Union of the Comoros | 18.2 (12.9 to 25.8) | 924.4 (649.3 to 1305.6) | 37.8 (26.9 to 53.1) | 23.6 (14.7 to 35.2) | 1192.9 (748.3 to 1758.3) | 59 (38 to 84) | 0.8 (0.5 to 1.2) | 37.9 (24 to 57.8) | 2.5 (1.5 to 3.8) | 3.7 (1.8 to 5.8) | 193 (92.2 to 304.1) | 10.8 (5 to 17.3) |
| United Arab Emirates | 136.5 (99.7 to 182.6) | 7115.1 (5190.2 to 9530.5) | 765.7 (547.7 to 1029.5) | 30.2 (21.2 to 43) | 1536.8 (1085.6 to 2136.1) | 109.3 (77.9 to 150.7) | 10.6 (6.8 to 17.5) | 563.7 (365 to 930.7) | 97.7 (62.4 to 162.3) | 42.5 (29.3 to 65.2) | 2172.4 (1498.1 to 3293.1) | 135.6 (95.4 to 199.2) |
| United Kingdom of Great Britain and Northern Ireland | 1006.8 (982.4 to 1029.7) | 53586.7 (51438.1 to 56064) | 7981.8 (7685.5 to 8274.3) | 239.3 (232 to 246.6) | 13207 (12657.3 to 13852.1) | 2495.3 (2361.1 to 2646.8) | 47.3 (45.9 to 48.8) | 2559.3 (2431.7 to 2704.1) | 672.4 (644.6 to 699.8) | 217.4 (211.5 to 223.6) | 10971 (10636.3 to 11342.4) | 945.4 (914.5 to 978.2) |
| United Mexican States | 2219.5 (1814.6 to 2650.9) | 114133.3 (93133.5 to 136472.8) | 12828.6 (10501.4 to 15328) | 1596 (1314.6 to 1892.9) | 82767.8 (68245.7 to 98002.6) | 8551.9 (7048.5 to 10118.6) | 144.7 (119.2 to 173.4) | 7261.7 (6002.8 to 8666.9) | 830.3 (682.6 to 993.6) | 839.9 (698.8 to 998.3) | 42700.3 (35533.6 to 50764.7) | 2608.2 (2176.8 to 3093.3) |
| United Republic of Tanzania | 1006.4 (689.7 to 1440.5) | 52501.7 (35771.6 to 74892.3) | 2186.7 (1500.8 to 3150.7) | 1221.8 (805.3 to 1731.2) | 62495.9 (41198.8 to 89432.8) | 3203.9 (2103.2 to 4568.9) | 38.4 (23.8 to 58.1) | 1951.5 (1193.9 to 2983.2) | 132.7 (80.6 to 200.4) | 200.7 (115.3 to 301.8) | 10707.9 (6099.7 to 16007.3) | 614.1 (343.7 to 917.9) |
| United States Virgin Islands | 2.1 (1.3 to 3.3) | 109.2 (69.5 to 168.8) | 9.6 (6.1 to 15.1) | 0.7 (0.4 to 1) | 33.9 (22.5 to 50.2) | 3 (2 to 4.5) | 0.1 (0.1 to 0.3) | 7.2 (4.1 to 14.3) | 0.8 (0.5 to 1.6) | 0.5 (0.3 to 0.7) | 24.5 (15.2 to 36.5) | 1.5 (0.9 to 2.3) |
| United States of America | 4525.5 (4303.4 to 4755) | 245505.1 (230221.5 to 260489.4) | 40650.8 (38530.1 to 42896.4) | 1382.4 (1326.4 to 1441.5) | 74592.2 (70914.5 to 78826.2) | 12405.8 (11815.4 to 13001.7) | 373.3 (358.9 to 388.9) | 21312.6 (19937.5 to 22968.1) | 7032.8 (6705.5 to 7344.6) | 913 (870.9 to 956.8) | 46064.7 (43790.8 to 48317.1) | 3463.5 (3311.5 to 3637.5) |

DALYs = disability-adjusted life years, UI = uncertainty intervals

Table S2 Age-standardized incidence, mortality and DALYs rate of Female Breast, Cervical, Uterine, and Ovarian Cancer in 2021

| **Locations** | **Female breast cancer** | | | **Cervical cancer** | | | **Uterine cancer** | | | **Ovarian cancer** | | |
| --- | --- | --- | --- | --- | --- | --- | --- | --- | --- | --- | --- | --- |
| **ASIR and 95%UI** | **ASMR and 95%UI** | **ASDR and 95%UI** | **ASIR and 95%UI** | **ASMR and 95%UI** | **ASDR and 95%UI** | **ASIR and 95%UI** | **ASMR and 95%UI** | **ASDR and 95%UI** | **ASIR and 95%UI** | **ASMR and 95%UI** | **ASDR and 95%UI** |
| Global | 18.8 (20.4 to 17.4) | 4.3 (4.7 to 4) | 227.5 (248.4 to 208) | 10.9 (12.1 to 9.9) | 2.8 (3.1 to 2.5) | 147.2 (164.3 to 131.7) | 1.9 (2.2 to 1.6) | 0.2 (0.3 to 0.2) | 12.6 (14.4 to 10.3) | 3.2 (3.6 to 2.8) | 0.9 (1 to 0.8) | 46.3 (51.9 to 40) |
| High SDI | 28.8 (30.3 to 27.4) | 3.4 (3.5 to 3.2) | 183.9 (194.6 to 173.8) | 8.6 (9 to 8.1) | 1 (1 to 0.9) | 53.4 (56.4 to 50.7) | 3.5 (3.7 to 3.3) | 0.2 (0.2 to 0.2) | 12.5 (13.5 to 11.7) | 3.2 (3.4 to 3) | 0.8 (0.8 to 0.7) | 41.4 (43.9 to 38.9) |
| High-middle SDI | 22.1 (25.6 to 19.1) | 3.5 (4 to 3.2) | 188.3 (213.1 to 166.8) | 9.8 (11.4 to 8.4) | 1.8 (2 to 1.6) | 94.3 (107.8 to 82) | 3.2 (3.8 to 2.7) | 0.3 (0.3 to 0.2) | 15.7 (18.7 to 13.1) | 3.3 (3.8 to 2.8) | 0.9 (1 to 0.8) | 46.6 (54 to 39.9) |
| Middle SDI | 18.5 (20.5 to 16.6) | 4.3 (4.8 to 3.9) | 223.3 (247.8 to 201.2) | 10.7 (12 to 9.5) | 2.5 (2.7 to 2.2) | 128.5 (142.8 to 115.5) | 1.7 (2 to 1.2) | 0.2 (0.3 to 0.2) | 13 (15.6 to 9.7) | 3.5 (4 to 2.8) | 0.9 (1 to 0.7) | 47.3 (53.7 to 39.3) |
| Low-middle SDI | 14.1 (16 to 12.2) | 5.2 (6 to 4.5) | 270.6 (312 to 233.3) | 11.5 (13.3 to 9.9) | 3.7 (4.2 to 3.2) | 190.1 (220.4 to 164.4) | 0.9 (1.1 to 0.7) | 0.2 (0.3 to 0.2) | 10.7 (13.5 to 8.5) | 3.1 (3.8 to 2.5) | 0.9 (1.1 to 0.7) | 48.4 (58.7 to 39.3) |
| Low SDI | 10.5 (12.3 to 8.7) | 4.9 (5.8 to 4.1) | 252.7 (299.4 to 210.5) | 15 (18.4 to 12.1) | 5.9 (7.3 to 4.8) | 305.1 (375.7 to 247.2) | 0.6 (0.9 to 0.5) | 0.2 (0.3 to 0.1) | 9.8 (13.3 to 7.2) | 2.3 (2.9 to 1.7) | 0.8 (1 to 0.6) | 41.5 (51.9 to 29.8) |
| Afghanistan | 14 (29.4 to 5.4) | 5.4 (11.2 to 2.1) | 273.2 (563.7 to 106.3) | 8.7 (14.8 to 4) | 3.9 (6.6 to 1.7) | 199.7 (339.9 to 90.3) | 1.7 (3.4 to 0.7) | 0.4 (0.8 to 0.2) | 21.4 (42.5 to 8.4) | 2 (5.2 to 0.9) | 0.7 (1.8 to 0.3) | 37 (94.9 to 16.4) |
| Albania | 14.7 (20.8 to 10) | 2.8 (3.7 to 1.9) | 143.4 (194.7 to 100.1) | 6.3 (10.1 to 3.8) | 1 (1.6 to 0.6) | 52.8 (82.8 to 32) | 2 (3.3 to 1.1) | 0.2 (0.3 to 0.1) | 11.2 (18.2 to 6.3) | 1.6 (2.5 to 0.9) | 0.5 (0.8 to 0.3) | 26 (41.6 to 15.2) |
| Algeria | 14.4 (21.7 to 8.9) | 2.5 (3.7 to 1.6) | 132 (194.5 to 84.8) | 5.6 (9.1 to 3.2) | 1.5 (2.3 to 0.8) | 76.5 (120.5 to 43.9) | 0.5 (0.9 to 0.3) | 0.1 (0.1 to 0) | 3 (4.9 to 1.7) | 1.2 (2 to 0.7) | 0.4 (0.6 to 0.2) | 18.7 (29.8 to 11.2) |
| American Samoa | 33.7 (49.1 to 21.9) | 13 (18.5 to 8.6) | 662.9 (950.1 to 439.7) | 14.8 (23.3 to 9) | 4 (6.1 to 2.5) | 205.1 (313.1 to 127.7) | 4.7 (10 to 1.9) | 0.8 (1.8 to 0.3) | 43.3 (92.6 to 17.5) | 3.9 (7.2 to 1.8) | 0.8 (1.5 to 0.4) | 43.9 (78.2 to 20.2) |
| Andorra | 35.6 (55.4 to 20.1) | 3.9 (5.9 to 2.3) | 212.4 (323.4 to 124.3) | 3.8 (6.5 to 2) | 0.4 (0.7 to 0.2) | 24 (40.4 to 13.1) | 1.7 (2.9 to 0.9) | 0.1 (0.2 to 0) | 5.4 (9 to 2.7) | 1.2 (2 to 0.6) | 0.3 (0.5 to 0.2) | 14.9 (24.3 to 7.9) |
| Angola | 11.2 (17.4 to 6.6) | 5.5 (8.5 to 3.3) | 278.8 (430.4 to 165) | 21.1 (36.5 to 11.6) | 8.3 (13.7 to 4.6) | 424.3 (708.2 to 234.7) | 0.6 (1.1 to 0.3) | 0.2 (0.4 to 0.1) | 9.7 (17.6 to 4.6) | 1.9 (3.4 to 0.8) | 0.6 (1.1 to 0.3) | 33.7 (59.6 to 15.3) |
| Antigua and Barbuda | 27.5 (33.8 to 22.1) | 6 (7 to 5.1) | 306.9 (357.7 to 260.1) | 13.5 (16.7 to 10.7) | 2.8 (3.4 to 2.4) | 148.5 (175.2 to 125.4) | 3.2 (3.9 to 2.7) | 0.6 (0.6 to 0.5) | 28.4 (33.1 to 24.5) | 4.4 (5.4 to 3.5) | 1.3 (1.5 to 1) | 66.4 (79.3 to 54) |
| Argentina | 20 (24.8 to 15.9) | 5.2 (6.1 to 4.3) | 266.8 (318 to 219.6) | 21.8 (28.4 to 16.3) | 4.7 (5.9 to 3.7) | 250.4 (315.1 to 196.6) | 1.3 (1.7 to 0.9) | 0.2 (0.2 to 0.1) | 9.7 (12.7 to 7.4) | 3.6 (4.6 to 2.7) | 1.1 (1.3 to 0.8) | 55.2 (68.4 to 43.5) |
| Armenia | 14.1 (17.2 to 11.3) | 3.2 (3.7 to 2.7) | 163.7 (191.6 to 137.8) | 6.3 (7.8 to 5.1) | 1.3 (1.5 to 1.1) | 66.4 (77.2 to 56.2) | 3 (3.7 to 2.3) | 0.4 (0.4 to 0.3) | 18.7 (22.5 to 15.5) | 2.6 (3.3 to 2) | 0.8 (1 to 0.7) | 44.1 (53.8 to 34.9) |
| Australia | 29.4 (36.9 to 22.9) | 3.1 (3.7 to 2.5) | 170.1 (204 to 140.5) | 7.7 (10.4 to 5.6) | 0.8 (1 to 0.6) | 42.8 (55.1 to 32.7) | 2.4 (3.1 to 1.8) | 0.1 (0.2 to 0.1) | 7.6 (9.8 to 5.8) | 2.5 (3.2 to 1.9) | 0.6 (0.8 to 0.5) | 32.4 (40.7 to 25.5) |
| Austria | 25.5 (32 to 20) | 3 (3.5 to 2.5) | 162.9 (193.4 to 135) | 4.6 (6.2 to 3.3) | 0.6 (0.8 to 0.5) | 34 (43.8 to 25.7) | 2.7 (3.6 to 2) | 0.1 (0.2 to 0.1) | 8.2 (10.5 to 6.1) | 2.8 (3.6 to 2.1) | 0.6 (0.8 to 0.5) | 32.7 (40.9 to 25.5) |
| Azerbaijan | 14.5 (19.6 to 10.2) | 4.2 (5.5 to 3.1) | 213.2 (277.8 to 156.4) | 5.5 (7.5 to 3.9) | 1.3 (1.7 to 1) | 68.7 (88.5 to 50.4) | 1.8 (3.1 to 1.3) | 0.3 (0.5 to 0.2) | 15.4 (25.5 to 10.8) | 2.1 (3.4 to 1.2) | 0.7 (1.1 to 0.4) | 37.4 (57.9 to 22.1) |
| Bahamas | 46.8 (63.3 to 33.6) | 12.1 (16.2 to 8.9) | 625.7 (840.5 to 459.6) | 21.7 (30 to 15.1) | 5.1 (6.8 to 3.6) | 266.5 (359.8 to 190.7) | 5.4 (7.4 to 3.8) | 1.1 (1.5 to 0.8) | 56.6 (75.9 to 40.8) | 8.4 (11.6 to 5.9) | 2.5 (3.3 to 1.8) | 131.2 (176.8 to 94.5) |
| Bahrain | 41.3 (59.1 to 27.6) | 5.5 (7.6 to 3.7) | 295 (412.9 to 201.4) | 2.5 (3.9 to 1.5) | 0.5 (0.8 to 0.3) | 27.9 (43.1 to 17) | 2.5 (4.3 to 1.3) | 0.2 (0.3 to 0.1) | 11.1 (18.8 to 6.1) | 4.1 (6.2 to 2.4) | 1.1 (1.7 to 0.7) | 58.5 (87.6 to 35.5) |
| Bangladesh | 11.2 (16.9 to 6.8) | 4 (5.9 to 2.5) | 206.1 (311.3 to 129) | 9 (15.2 to 4.9) | 2.7 (4.5 to 1.5) | 140.5 (236.1 to 75.6) | 0.4 (1 to 0.2) | 0.1 (0.2 to 0) | 4.5 (10.9 to 1.9) | 2.6 (4.8 to 1.2) | 0.8 (1.4 to 0.4) | 41.7 (75.5 to 19.7) |
| Barbados | 37.5 (50.9 to 26.7) | 7.9 (10.5 to 5.9) | 414.1 (545 to 304.8) | 20.9 (29.2 to 14.8) | 4.2 (5.7 to 3.1) | 224.2 (301.6 to 164.1) | 5.3 (7.2 to 3.8) | 0.9 (1.2 to 0.6) | 45.6 (60.7 to 33.8) | 5.4 (7.5 to 3.9) | 1.5 (2 to 1.1) | 80.1 (107.2 to 58.5) |
| Belarus | 21.5 (30 to 14.6) | 3.7 (5 to 2.6) | 193.8 (262.5 to 135.4) | 11.5 (16.4 to 7.5) | 2.3 (3.2 to 1.6) | 119.4 (166.1 to 82.6) | 5.3 (7.6 to 3.6) | 0.4 (0.5 to 0.3) | 20.4 (28.5 to 13.9) | 3.5 (4.8 to 2.4) | 1.2 (1.7 to 0.8) | 60.9 (83.6 to 42.8) |
| Belgium | 29.4 (37 to 22.9) | 3.5 (4.1 to 2.9) | 191.2 (227.7 to 156.2) | 6.1 (8.2 to 4.4) | 0.8 (1 to 0.6) | 42.4 (54.7 to 31.8) | 2.6 (3.5 to 2) | 0.2 (0.2 to 0.1) | 9.2 (11.8 to 6.9) | 2.9 (3.8 to 2.2) | 0.7 (0.9 to 0.6) | 38.2 (48.4 to 29.7) |
| Belize | 13.2 (16.7 to 10.3) | 3.7 (4.6 to 3) | 189.1 (231.9 to 152.9) | 26.8 (33.9 to 20.7) | 6.9 (8.4 to 5.6) | 357.5 (434.4 to 288) | 3.5 (4.3 to 2.8) | 0.8 (0.9 to 0.6) | 39.5 (47.7 to 32) | 2.2 (2.9 to 1.7) | 0.7 (0.9 to 0.5) | 36.4 (45 to 28.9) |
| Benin | 7.1 (11.5 to 4) | 3.4 (5.6 to 2) | 174.3 (282.7 to 100) | 14 (23.5 to 7.7) | 5.3 (8.6 to 3) | 275.7 (454.7 to 155.6) | 0.5 (0.8 to 0.2) | 0.1 (0.2 to 0.1) | 7 (11.9 to 3.8) | 1.1 (1.8 to 0.6) | 0.4 (0.6 to 0.2) | 18.8 (31 to 10.2) |
| Bermuda | 37.3 (49.9 to 26.7) | 4.4 (5.7 to 3.3) | 238.3 (306.7 to 179.6) | 8.4 (12.1 to 5.6) | 1.1 (1.5 to 0.8) | 59.4 (82.8 to 41.8) | 4.4 (6.2 to 3.1) | 0.4 (0.6 to 0.3) | 22.6 (30.7 to 16) | 5.9 (7.8 to 4.3) | 1.4 (1.8 to 1.1) | 76.8 (99 to 57.8) |
| Bhutan | 7.4 (12 to 4.1) | 2.8 (4.5 to 1.6) | 143.1 (233.6 to 80.8) | 9.4 (16.2 to 5) | 3 (5 to 1.7) | 152.3 (256.6 to 83.6) | 0.5 (1.1 to 0.2) | 0.1 (0.2 to 0) | 5.2 (12.2 to 2.3) | 2.7 (5.2 to 1.3) | 0.8 (1.5 to 0.4) | 44.2 (83.5 to 21.9) |
| Bolivia (Plurinational State of) | 13 (20.4 to 7.6) | 4.7 (7.2 to 2.8) | 236.9 (361.9 to 142.2) | 18.6 (30.2 to 10.8) | 6 (9.7 to 3.6) | 303.6 (493 to 180.4) | 2.1 (3.6 to 1.1) | 0.5 (0.9 to 0.3) | 25.7 (42.9 to 13.7) | 3.5 (6.1 to 1.9) | 1.1 (1.9 to 0.6) | 59 (99.8 to 32.8) |
| Bosnia and Herzegovina | 15.6 (22.1 to 10.2) | 2.9 (4.1 to 2) | 151.5 (210.1 to 100.5) | 9.8 (14.3 to 6.1) | 1.6 (2.3 to 1) | 84.1 (117.8 to 54) | 2.1 (3.1 to 1.3) | 0.2 (0.3 to 0.1) | 11.5 (16.3 to 6.9) | 3 (4.3 to 1.9) | 1 (1.4 to 0.6) | 49.6 (70.5 to 30.6) |
| Botswana | 12.4 (21.7 to 6.3) | 5.4 (9.2 to 2.8) | 271.1 (469.8 to 140.7) | 14.6 (26.2 to 7.8) | 5.2 (9.3 to 2.9) | 264.2 (473.3 to 145.8) | 0.7 (1.4 to 0.3) | 0.2 (0.4 to 0.1) | 8.6 (17.9 to 3.9) | 2.8 (5 to 1.1) | 0.9 (1.6 to 0.4) | 48 (85.5 to 19.5) |
| Brazil | 20.7 (22.7 to 18.9) | 5.4 (5.8 to 5) | 275.7 (297.3 to 255.5) | 16.6 (18.2 to 15.2) | 3.8 (4.1 to 3.5) | 201.8 (219 to 186.2) | 1.3 (1.5 to 1.2) | 0.2 (0.3 to 0.2) | 11.9 (13.1 to 10.9) | 3.6 (4 to 3.3) | 1 (1.1 to 0.9) | 55.2 (60 to 50.4) |
| Brunei Darussalam | 23.8 (33.5 to 16.3) | 6.2 (8.3 to 4.3) | 313.7 (424.4 to 219.1) | 11.7 (17.6 to 7.4) | 2.8 (4.2 to 1.9) | 145.1 (212.9 to 94.8) | 2 (3.2 to 1.2) | 0.4 (0.6 to 0.2) | 19.7 (30.8 to 12) | 5.4 (8.1 to 3.4) | 1.8 (2.6 to 1.2) | 91 (135.2 to 59.1) |
| Bulgaria | 30.7 (40.1 to 23.1) | 5.6 (6.9 to 4.4) | 292.4 (360.7 to 230) | 17.8 (24.4 to 12.6) | 3.3 (4.2 to 2.5) | 171.4 (223.2 to 128.5) | 7.5 (9.8 to 5.5) | 0.8 (1.1 to 0.6) | 44.5 (56.9 to 33.7) | 5.5 (7.3 to 4) | 1.9 (2.5 to 1.4) | 97.7 (128.6 to 73.3) |
| Burkina Faso | 13 (20.6 to 7.4) | 6.5 (10.4 to 3.8) | 336.2 (535.6 to 192.6) | 16.4 (27.1 to 9.1) | 6.5 (10.6 to 3.7) | 338.8 (561.2 to 190.2) | 0.4 (0.8 to 0.2) | 0.1 (0.2 to 0.1) | 7 (12.4 to 3.7) | 1.1 (1.9 to 0.6) | 0.4 (0.6 to 0.2) | 19.6 (33.3 to 10.6) |
| Burundi | 8.2 (13.3 to 4.9) | 4.5 (7.2 to 2.7) | 227.5 (367.9 to 136) | 20.2 (32.9 to 11.6) | 8.8 (14.5 to 5.1) | 452.1 (747 to 261.3) | 0.6 (1.1 to 0.3) | 0.2 (0.4 to 0.1) | 10.2 (19 to 5.1) | 2.8 (4.7 to 1.4) | 1 (1.6 to 0.5) | 51.4 (86.1 to 25.9) |
| Cabo Verde | 11.4 (17.6 to 7.2) | 3.6 (5.5 to 2.3) | 186 (279.4 to 117.5) | 9.9 (15.9 to 5.7) | 2.7 (4.3 to 1.6) | 138.6 (222.9 to 82.2) | 0.7 (1.5 to 0.3) | 0.1 (0.3 to 0.1) | 6.6 (14.4 to 3.2) | 1.4 (2.5 to 0.6) | 0.4 (0.7 to 0.2) | 21.5 (36.8 to 9) |
| Cambodia | 15.9 (24.5 to 9.8) | 6.6 (9.8 to 4.2) | 328.4 (495 to 206.6) | 10.2 (17.1 to 5.8) | 3.5 (5.8 to 2.1) | 179.3 (299.4 to 104.3) | 2.1 (3.8 to 1.1) | 0.5 (0.8 to 0.2) | 23.4 (41.8 to 11.9) | 8.2 (15.3 to 4) | 1.7 (3 to 0.9) | 91.5 (164.6 to 45.7) |
| Cameroon | 10.8 (17.1 to 6.2) | 5 (7.8 to 2.9) | 253.4 (397.8 to 146.9) | 18.7 (31.7 to 9.8) | 6.8 (11.2 to 3.6) | 355.9 (590.7 to 187.7) | 0.6 (1 to 0.3) | 0.2 (0.3 to 0.1) | 8.9 (15.2 to 4.5) | 1.5 (2.6 to 0.8) | 0.5 (0.8 to 0.2) | 25.8 (43.5 to 13.3) |
| Canada | 28.5 (36.3 to 22) | 3.2 (3.9 to 2.7) | 178.7 (215.7 to 146.4) | 13.7 (18.4 to 9.7) | 1 (1.3 to 0.7) | 57.7 (74.9 to 43) | 2.8 (3.8 to 2.1) | 0.2 (0.2 to 0.1) | 10.6 (13.8 to 8) | 2.9 (3.8 to 2.2) | 0.7 (0.9 to 0.6) | 37.9 (46.9 to 30) |
| Central African Republic | 8.8 (14.2 to 4.9) | 5.5 (8.8 to 3) | 272.9 (434.5 to 150.1) | 24.7 (41.1 to 13.3) | 12.5 (21.1 to 6.8) | 629.9 (1061.5 to 340.1) | 0.5 (1 to 0.3) | 0.2 (0.4 to 0.1) | 11.4 (20.5 to 5.6) | 1.4 (2.5 to 0.7) | 0.5 (1 to 0.3) | 27.8 (49.3 to 14.7) |
| Chad | 6.2 (9.8 to 3.6) | 3.4 (5.4 to 2) | 170.7 (268.4 to 101.7) | 17.6 (29.4 to 9.8) | 7.6 (12.4 to 4.4) | 394.5 (644.8 to 225) | 0.4 (0.7 to 0.2) | 0.1 (0.3 to 0.1) | 7.2 (12.7 to 3.7) | 0.8 (1.4 to 0.4) | 0.3 (0.5 to 0.1) | 14.9 (25.9 to 7.4) |
| Chile | 15.8 (19.9 to 12.2) | 3 (3.5 to 2.4) | 155.5 (188.2 to 126.9) | 16.3 (21.5 to 12) | 2.7 (3.4 to 2.1) | 146.2 (183.3 to 112.7) | 1.1 (1.5 to 0.8) | 0.1 (0.1 to 0.1) | 6.3 (8.1 to 4.8) | 3.2 (4.2 to 2.4) | 0.9 (1.1 to 0.7) | 45.4 (56.7 to 35.2) |
| China | 18.7 (24.5 to 13.8) | 2.7 (3.6 to 2) | 148.2 (194.7 to 109.3) | 9.1 (12.1 to 6.4) | 1.6 (2.1 to 1.1) | 82.1 (109.7 to 58.3) | 2.4 (3.4 to 1.6) | 0.3 (0.4 to 0.2) | 14.5 (20.6 to 9.7) | 2.3 (3.1 to 1.6) | 0.6 (0.8 to 0.4) | 32.5 (44.7 to 22.9) |
| Colombia | 31.2 (41.7 to 22.6) | 4.2 (5.4 to 3.2) | 226 (293.1 to 171) | 23.3 (32.2 to 16.2) | 3.4 (4.5 to 2.5) | 182.9 (245.5 to 133) | 1.4 (1.9 to 1) | 0.2 (0.3 to 0.1) | 10.2 (13.8 to 7.4) | 4.8 (6.4 to 3.4) | 1.3 (1.7 to 1) | 69.5 (91.5 to 51.5) |
| Comoros | 14.8 (22.9 to 9.2) | 7.1 (10.9 to 4.5) | 363.7 (561.6 to 228.3) | 23.4 (38.3 to 12.9) | 9.2 (15 to 5.1) | 470 (771 to 258.4) | 1 (1.7 to 0.5) | 0.3 (0.5 to 0.2) | 14.8 (25.9 to 7.9) | 4.4 (7.9 to 1.9) | 1.5 (2.5 to 0.6) | 77.7 (133.6 to 34.4) |
| Congo | 18.8 (32.9 to 9.5) | 8.8 (15.2 to 4.5) | 440.2 (764.1 to 227.9) | 29.5 (51 to 14.8) | 11.2 (18.8 to 5.7) | 569.2 (959.2 to 287.8) | 1.1 (2.1 to 0.6) | 0.3 (0.6 to 0.2) | 16 (28.5 to 8.1) | 2.6 (4.5 to 1.4) | 0.9 (1.5 to 0.5) | 46.4 (78.7 to 25) |
| Cook Islands | 43.5 (64.9 to 27.2) | 10.6 (15.7 to 6.8) | 553.6 (822.3 to 351.7) | 6 (9.8 to 3.4) | 1.1 (1.8 to 0.7) | 57.2 (93.5 to 33.6) | 1.9 (3.2 to 1) | 0.2 (0.3 to 0.1) | 10.4 (17.6 to 5.9) | 1.8 (3.1 to 1) | 0.3 (0.6 to 0.2) | 18.3 (30.3 to 10.1) |
| Costa Rica | 36.3 (47.6 to 27.1) | 4.3 (5.4 to 3.4) | 234.8 (294.1 to 184.1) | 19.8 (27 to 14.2) | 2.7 (3.5 to 2) | 144.6 (187.3 to 107) | 2.5 (3.4 to 1.8) | 0.3 (0.4 to 0.2) | 16.4 (21.6 to 12.1) | 3.9 (5.2 to 2.9) | 1.1 (1.4 to 0.8) | 56 (72.9 to 41.6) |
| Croatia | 24.7 (31.8 to 18.6) | 3.3 (4 to 2.6) | 173.3 (211.5 to 135.9) | 8.7 (11.9 to 6.2) | 1 (1.3 to 0.8) | 55.7 (72.2 to 41) | 5.7 (7.6 to 4.1) | 0.3 (0.3 to 0.2) | 16.1 (21.1 to 11.7) | 4.9 (6.3 to 3.6) | 1.2 (1.5 to 0.9) | 59.5 (75.2 to 45.5) |
| Cuba | 21.4 (28.6 to 15.7) | 3.7 (4.7 to 2.8) | 189.7 (242 to 146.8) | 16.3 (22.5 to 11.4) | 2.8 (3.8 to 2.1) | 150 (201.4 to 108.6) | 6.1 (8.4 to 4.4) | 0.8 (1.1 to 0.6) | 42.9 (57.3 to 31.6) | 3.5 (4.7 to 2.5) | 1 (1.3 to 0.7) | 50.2 (66.3 to 37) |
| Cyprus | 30.1 (41.9 to 20.8) | 3.1 (4.2 to 2.2) | 168.3 (230.7 to 119.6) | 4.3 (6.6 to 2.6) | 0.6 (0.8 to 0.3) | 29.7 (44.5 to 18.7) | 2 (3.7 to 1.2) | 0.1 (0.2 to 0.1) | 6.8 (12.2 to 3.9) | 2.4 (3.8 to 1.4) | 0.6 (1 to 0.4) | 32.3 (50.4 to 18.5) |
| Czechia | 23.8 (30.5 to 17.9) | 3.1 (3.7 to 2.5) | 166.3 (202.8 to 132.9) | 6.6 (9 to 4.7) | 1 (1.4 to 0.8) | 55.8 (73.3 to 41.6) | 4.9 (6.5 to 3.7) | 0.3 (0.4 to 0.3) | 19.4 (25 to 14.8) | 4.2 (5.6 to 3.1) | 1 (1.3 to 0.8) | 55 (70.2 to 42.2) |
| C么te d'Ivoire | 11.8 (18.6 to 7.1) | 5.4 (8.3 to 3.3) | 273.7 (421.9 to 164.3) | 8.5 (14.1 to 4.7) | 3.2 (5.2 to 1.7) | 162.4 (270.4 to 88.6) | 0.5 (0.8 to 0.2) | 0.1 (0.2 to 0.1) | 6.6 (11.5 to 3.4) | 2.1 (3.6 to 1.1) | 0.7 (1.1 to 0.4) | 36.6 (61.6 to 19.5) |
| Democratic People's Republic of Korea | 15 (24.5 to 8.5) | 4.5 (7 to 2.6) | 230.6 (357.6 to 131.5) | 12.4 (20.8 to 6.6) | 3.4 (5.6 to 1.9) | 173.8 (288.2 to 95.6) | 3.3 (5.8 to 1.6) | 0.5 (0.9 to 0.2) | 25 (44.9 to 12.5) | 4.8 (8.1 to 2.6) | 0.9 (1.5 to 0.5) | 46.8 (79.3 to 25.9) |
| Democratic Republic of the Congo | 9.8 (15.5 to 5.9) | 5 (7.9 to 3.1) | 250.3 (394.1 to 151.8) | 20.4 (33.9 to 10.8) | 8.4 (14 to 4.6) | 427.1 (711.8 to 232.3) | 0.6 (1.1 to 0.3) | 0.2 (0.3 to 0.1) | 9.2 (16.9 to 4.2) | 1.6 (2.8 to 0.8) | 0.6 (1 to 0.3) | 30.2 (51.7 to 15.1) |
| Denmark | 25.4 (32.1 to 19.7) | 3 (3.6 to 2.5) | 166.6 (200.2 to 136.3) | 6.9 (9.2 to 5) | 0.8 (1.1 to 0.7) | 46.3 (59.9 to 35.3) | 2.6 (3.5 to 1.9) | 0.1 (0.2 to 0.1) | 8.5 (11.1 to 6.4) | 2.1 (2.7 to 1.6) | 0.6 (0.7 to 0.4) | 29 (36.8 to 22.6) |
| Djibouti | 13 (22.1 to 7.1) | 6.1 (10.1 to 3.4) | 305.7 (513.1 to 168.3) | 19 (33.3 to 9.8) | 7.5 (13.2 to 3.8) | 375.2 (666.4 to 192.4) | 0.8 (1.7 to 0.4) | 0.2 (0.5 to 0.1) | 11.8 (24.5 to 5.3) | 3.1 (5.8 to 1.3) | 1.1 (2 to 0.5) | 55.9 (102.8 to 23.8) |
| Dominica | 24.1 (34.6 to 15.8) | 7.4 (10.4 to 5) | 374.7 (529.1 to 251.3) | 20.5 (31.3 to 12.5) | 5.5 (8.3 to 3.5) | 287.9 (434.1 to 179.8) | 2.5 (4.2 to 1.4) | 0.6 (1 to 0.4) | 31.3 (50.6 to 18.3) | 2.6 (4.2 to 1.5) | 0.8 (1.2 to 0.5) | 42.1 (66.3 to 25.5) |
| Dominican Republic | 14.5 (21.7 to 9) | 4.4 (6.3 to 2.8) | 222.9 (323.7 to 143.5) | 16.5 (25.4 to 9.7) | 4.4 (6.6 to 2.7) | 229.9 (348.8 to 139.6) | 3.5 (5.5 to 1.9) | 0.8 (1.3 to 0.5) | 42 (66.4 to 23.4) | 2.1 (3.4 to 1.3) | 0.7 (1 to 0.4) | 35.1 (55.2 to 21.4) |
| Ecuador | 13.5 (18.8 to 9.1) | 3.6 (4.9 to 2.5) | 182.2 (250.9 to 127.2) | 15.7 (22.7 to 10.5) | 3.8 (5.4 to 2.6) | 197.9 (278.6 to 134.3) | 2.5 (3.7 to 1.6) | 0.4 (0.6 to 0.3) | 22.6 (32.4 to 15.3) | 3.7 (5.2 to 2.5) | 1 (1.4 to 0.7) | 55.8 (77.4 to 38.8) |
| Egypt | 22.1 (31.5 to 14.7) | 4.7 (6.5 to 3.2) | 245.9 (343.3 to 167.9) | 1.8 (2.8 to 1) | 0.5 (0.8 to 0.3) | 27.4 (42.1 to 16.6) | 1 (1.7 to 0.6) | 0.1 (0.2 to 0.1) | 7.2 (12 to 4) | 1.8 (2.7 to 1.1) | 0.5 (0.8 to 0.3) | 27.8 (40.8 to 17.4) |
| El Salvador | 22.9 (32.9 to 15.2) | 3.7 (5.3 to 2.6) | 196.7 (281.3 to 138.7) | 31.5 (45.3 to 20.9) | 5.5 (7.7 to 3.8) | 290.4 (401.6 to 196.3) | 1.7 (2.5 to 1.1) | 0.3 (0.4 to 0.2) | 14.7 (20.9 to 9.9) | 4.2 (6.2 to 2.6) | 1.2 (1.7 to 0.8) | 64 (93 to 40) |
| Equatorial Guinea | 17.6 (31.5 to 8.8) | 6.8 (12.2 to 3.5) | 345.2 (618.3 to 177.2) | 22.9 (42.4 to 10.7) | 7.3 (13.3 to 3.5) | 374.2 (686.9 to 179.7) | 1 (1.8 to 0.4) | 0.2 (0.4 to 0.1) | 11.3 (20.8 to 5.1) | 2.6 (5 to 1.2) | 0.8 (1.6 to 0.4) | 43.5 (83.3 to 19.4) |
| Eritrea | 13.7 (22.2 to 7.7) | 7.4 (11.9 to 4.1) | 369.6 (594.9 to 205.4) | 28.4 (48.2 to 15.4) | 12.8 (21.1 to 7) | 635.5 (1059.8 to 348.6) | 0.9 (1.7 to 0.5) | 0.3 (0.6 to 0.2) | 15.5 (29.1 to 7.7) | 3.4 (6.1 to 1.8) | 1.2 (2.1 to 0.6) | 64.5 (111.8 to 33.5) |
| Estonia | 19.3 (25.3 to 14.5) | 2.8 (3.6 to 2.2) | 149.3 (188.7 to 113.9) | 10.4 (14.2 to 7.3) | 1.5 (1.9 to 1.1) | 77.8 (102.8 to 56.4) | 4.5 (6 to 3.2) | 0.3 (0.3 to 0.2) | 14.4 (18.7 to 10.3) | 3.7 (5 to 2.7) | 1 (1.3 to 0.8) | 53.5 (69.6 to 39.7) |
| Eswatini | 14.6 (26.4 to 6.9) | 6.9 (12.4 to 3.3) | 344.7 (622.8 to 164.8) | 29.1 (54.7 to 12.8) | 11.5 (21.1 to 5.2) | 574.8 (1059.8 to 258.4) | 0.9 (1.8 to 0.4) | 0.3 (0.5 to 0.1) | 13.6 (25.5 to 5.7) | 3.5 (6.8 to 1.5) | 1.2 (2.3 to 0.5) | 62.4 (123.7 to 26.9) |
| Ethiopia | 11.4 (15.4 to 8.3) | 5.3 (7.1 to 3.9) | 277 (367.2 to 202.4) | 13.7 (21.5 to 8.9) | 5.3 (8.3 to 3.6) | 273 (427.9 to 182.6) | 0.5 (0.9 to 0.3) | 0.1 (0.3 to 0.1) | 7.3 (13.9 to 4.2) | 3 (4.6 to 1.5) | 1 (1.5 to 0.5) | 53.3 (81.4 to 25.8) |
| Fiji | 26.3 (40 to 16.5) | 11.8 (17.4 to 7.6) | 604.8 (899.7 to 384.8) | 26.8 (42.5 to 15.2) | 8.1 (12.6 to 4.6) | 415.4 (646.9 to 236.6) | 3.1 (5.3 to 1.7) | 0.7 (1.1 to 0.4) | 33.8 (58.4 to 18.6) | 2.4 (3.9 to 1.3) | 0.5 (0.9 to 0.3) | 27.6 (44.8 to 15.9) |
| Finland | 27.1 (33.7 to 20.9) | 2.7 (3.2 to 2.2) | 151.7 (182.5 to 123.9) | 4.6 (6.3 to 3.2) | 0.5 (0.7 to 0.4) | 28.2 (36.8 to 20.6) | 2.8 (3.7 to 2) | 0.2 (0.2 to 0.1) | 9.7 (12.9 to 7.2) | 3.3 (4.3 to 2.4) | 0.7 (0.9 to 0.5) | 35.8 (45.3 to 27.7) |
| France | 39.2 (48.2 to 30.9) | 3.7 (4.4 to 3.2) | 210.3 (250.5 to 174.6) | 6.2 (8.3 to 4.5) | 0.8 (1 to 0.6) | 41.5 (53.2 to 31.4) | 2.7 (3.5 to 1.9) | 0.2 (0.2 to 0.1) | 8.9 (11.6 to 6.6) | 3 (4 to 2.3) | 0.6 (0.7 to 0.5) | 31.3 (39.6 to 24.1) |
| Gabon | 16.7 (27.1 to 9.5) | 6.9 (11 to 3.9) | 346.5 (551.5 to 196.1) | 19.8 (34.8 to 10.4) | 6.8 (11.6 to 3.7) | 343.2 (590.5 to 187.9) | 1 (1.7 to 0.5) | 0.2 (0.4 to 0.1) | 11.8 (20.4 to 5.8) | 2.6 (4.6 to 1.3) | 0.9 (1.5 to 0.4) | 45 (78.7 to 23) |
| Gambia | 5.5 (8.9 to 3.2) | 2.5 (4 to 1.5) | 125.5 (200.3 to 75) | 18.5 (30.9 to 9.7) | 6.6 (11 to 3.6) | 345.5 (578.3 to 188.2) | 0.6 (1.1 to 0.3) | 0.2 (0.3 to 0.1) | 8.7 (15.2 to 4.5) | 1.2 (2 to 0.5) | 0.4 (0.6 to 0.2) | 20 (34.4 to 9.9) |
| Georgia | 22.2 (27.2 to 18) | 5.9 (6.9 to 5) | 301 (349.2 to 253) | 10.4 (12.8 to 8.3) | 2.4 (2.8 to 2) | 122.1 (142.3 to 103.1) | 4.7 (5.6 to 3.8) | 0.7 (0.8 to 0.6) | 35.7 (41 to 30.5) | 5.5 (6.8 to 4.4) | 1.9 (2.2 to 1.5) | 96.7 (115.7 to 78.5) |
| Germany | 31.4 (38.7 to 25.1) | 3.8 (4.4 to 3.2) | 207.3 (243.9 to 175) | 7.4 (9.9 to 5.4) | 0.9 (1.2 to 0.7) | 50.8 (64.8 to 38.7) | 2.1 (2.8 to 1.6) | 0.1 (0.2 to 0.1) | 7.1 (9.2 to 5.4) | 2.8 (3.6 to 2.2) | 0.7 (0.9 to 0.6) | 38.3 (47.1 to 30.6) |
| Ghana | 13.4 (21 to 7.9) | 5.8 (9 to 3.5) | 298.7 (463.6 to 180) | 17.7 (28.9 to 9.7) | 6.1 (9.8 to 3.4) | 318.9 (513.5 to 177.9) | 0.8 (1.4 to 0.4) | 0.2 (0.4 to 0.1) | 10.6 (19.7 to 5.3) | 1.8 (3 to 0.9) | 0.6 (0.9 to 0.3) | 29.6 (49.9 to 15.1) |
| Greece | 30.6 (37.4 to 24.8) | 4 (4.5 to 3.5) | 213.6 (245.8 to 184.4) | 5.9 (7.4 to 4.7) | 0.8 (1 to 0.7) | 44.3 (52 to 37.4) | 2.9 (3.4 to 2.4) | 0.2 (0.2 to 0.2) | 10.5 (12.2 to 9.1) | 3.3 (4 to 2.7) | 0.9 (1.1 to 0.8) | 45.7 (53.4 to 38.7) |
| Greenland | 17.6 (27.4 to 10.5) | 4.7 (7.2 to 2.8) | 234.7 (360.8 to 139.6) | 21.7 (35.7 to 11.8) | 3.7 (6 to 2.2) | 201 (324.7 to 115.5) | 0.6 (1.2 to 0.3) | 0.1 (0.2 to 0.1) | 5 (9 to 2.7) | 5.8 (9.5 to 3) | 1.9 (3.1 to 1) | 94.1 (151.5 to 48.4) |
| Grenada | 27.9 (36.9 to 20.4) | 7.6 (9.8 to 5.7) | 391.7 (508.9 to 290.8) | 26.8 (37.6 to 18.5) | 6.5 (8.9 to 4.7) | 341 (471.4 to 245) | 3.7 (5.2 to 2.4) | 0.8 (1.1 to 0.5) | 40.2 (55.7 to 27.2) | 7 (9.3 to 5.3) | 2.1 (2.6 to 1.6) | 110.3 (141.2 to 85.6) |
| Guam | 19.3 (25.9 to 14.2) | 5.8 (7.6 to 4.3) | 296.9 (387.9 to 221.5) | 9 (12.5 to 6.3) | 2 (2.6 to 1.5) | 101.2 (134.3 to 73.7) | 3.5 (4.8 to 2.3) | 0.4 (0.6 to 0.3) | 22.7 (30.6 to 15.5) | 5.2 (7.3 to 3.5) | 1.1 (1.5 to 0.8) | 56.7 (78 to 38.8) |
| Guatemala | 12.2 (15.8 to 9.2) | 2.9 (3.6 to 2.2) | 147.9 (184.8 to 115.5) | 21.7 (28.1 to 16.3) | 5.1 (6.3 to 4.1) | 262 (324.4 to 207.3) | 1.8 (2.2 to 1.4) | 0.4 (0.5 to 0.3) | 20.9 (25.4 to 17) | 2.1 (2.7 to 1.6) | 0.7 (0.8 to 0.5) | 34.7 (43.1 to 27.6) |
| Guinea | 8.4 (13.8 to 4.9) | 4.4 (7.2 to 2.6) | 222.5 (360.9 to 127.1) | 28.1 (46.3 to 15.8) | 11.6 (18.9 to 6.5) | 600.2 (988.6 to 336.3) | 0.6 (1.1 to 0.3) | 0.2 (0.4 to 0.1) | 9.9 (18.4 to 4.9) | 1.2 (2.1 to 0.6) | 0.4 (0.7 to 0.2) | 22.4 (38.3 to 10.4) |
| Guinea-Bissau | 11.9 (19 to 6.8) | 6.5 (10.3 to 3.8) | 328.2 (519.9 to 189.5) | 28.4 (46 to 15.6) | 12.3 (19.6 to 6.9) | 634.9 (1016.4 to 352.1) | 0.7 (1.1 to 0.3) | 0.2 (0.4 to 0.1) | 12.1 (20.5 to 6.2) | 1.5 (2.6 to 0.8) | 0.5 (0.9 to 0.3) | 28.2 (46.6 to 15.2) |
| Guyana | 21.6 (31.3 to 14) | 8.1 (11.6 to 5.3) | 406.7 (585.7 to 268.3) | 22 (33.8 to 13.4) | 6.9 (10.4 to 4.4) | 360.9 (542.5 to 228) | 3.9 (5.8 to 2.5) | 1.1 (1.7 to 0.7) | 58.8 (86.9 to 37.3) | 6.8 (9.8 to 4.4) | 2.2 (3.2 to 1.5) | 116.7 (167.6 to 77.5) |
| Haiti | 15.7 (26.7 to 8.6) | 7.8 (13 to 4.2) | 387.4 (651.9 to 210.5) | 30.1 (48.3 to 16.9) | 12 (19.1 to 6.8) | 627 (1001 to 354.1) | 2.4 (4.5 to 1.1) | 1 (1.8 to 0.5) | 48.4 (89.7 to 23.2) | 3.5 (7.6 to 1.8) | 1.3 (2.7 to 0.7) | 66.9 (141 to 35.7) |
| Honduras | 12.3 (20.2 to 6.9) | 3.3 (5.3 to 1.9) | 162 (263.2 to 92.9) | 19.4 (32.4 to 9.4) | 5 (8.2 to 2.5) | 255.3 (417.8 to 125.2) | 3.2 (5.7 to 1.6) | 0.8 (1.5 to 0.4) | 40.7 (73.8 to 20.5) | 5.8 (11.3 to 2.4) | 1.9 (3.5 to 0.8) | 98.6 (189.5 to 42.4) |
| Hungary | 24.1 (30.8 to 18.5) | 3.8 (4.6 to 3.1) | 200.1 (243.1 to 162) | 11.7 (16.3 to 8.2) | 1.6 (2.1 to 1.2) | 86.9 (114.4 to 63.7) | 3.9 (5.1 to 2.9) | 0.3 (0.4 to 0.3) | 18.5 (23.6 to 14.3) | 3.7 (4.8 to 2.8) | 1.2 (1.5 to 0.9) | 59.8 (75.6 to 46.3) |
| Iceland | 32.8 (41.8 to 25.1) | 3.7 (4.4 to 3) | 200.3 (242.2 to 161.3) | 5.9 (8 to 4.1) | 0.6 (0.8 to 0.5) | 35.5 (46.3 to 25.8) | 2.7 (3.6 to 1.9) | 0.1 (0.2 to 0.1) | 8 (10.6 to 5.9) | 3.2 (4.2 to 2.4) | 0.8 (1 to 0.6) | 41.1 (52.7 to 31.4) |
| India | 11.7 (14.1 to 9.6) | 4.4 (5.3 to 3.6) | 224.1 (271.2 to 184.3) | 10 (12.2 to 8.2) | 3.3 (4 to 2.7) | 167.5 (205.2 to 136.9) | 0.5 (0.6 to 0.4) | 0.1 (0.1 to 0.1) | 5.4 (7.3 to 4.1) | 2.5 (3.1 to 1.9) | 0.8 (1 to 0.6) | 41.8 (51.9 to 32.5) |
| Indonesia | 15.8 (22.4 to 10.7) | 6.1 (8.8 to 4.1) | 305 (438.7 to 208.1) | 8.4 (11.7 to 6) | 2.8 (3.8 to 2) | 141.3 (194.9 to 100.6) | 2.2 (3.3 to 1.1) | 0.4 (0.7 to 0.2) | 22.5 (33.7 to 11.5) | 6.5 (10.6 to 3.9) | 1.3 (2.1 to 0.8) | 70.2 (113.7 to 42.4) |
| Iran (Islamic Republic of) | 30.6 (36.9 to 24.7) | 3.3 (3.8 to 2.9) | 186.5 (214.3 to 162.6) | 1.4 (1.8 to 1.1) | 0.4 (0.4 to 0.3) | 20 (23.8 to 16.7) | 1.2 (1.7 to 0.5) | 0.1 (0.1 to 0) | 5.9 (8.1 to 2.4) | 2.2 (2.9 to 1.1) | 0.6 (0.7 to 0.3) | 30.3 (38 to 16.4) |
| Iraq | 31 (47.5 to 19.3) | 5.6 (8.4 to 3.5) | 289.3 (432.1 to 184.1) | 2 (3.3 to 1.1) | 0.6 (0.9 to 0.3) | 28.5 (46.1 to 16.7) | 1.6 (2.7 to 0.8) | 0.2 (0.3 to 0.1) | 9.2 (15.1 to 5) | 2.8 (4.7 to 1.6) | 0.8 (1.4 to 0.5) | 42.9 (70.5 to 25.1) |
| Ireland | 33.1 (41.5 to 25.9) | 3.5 (4.2 to 2.9) | 193.3 (231.6 to 159.3) | 6.6 (9.1 to 4.7) | 0.8 (1 to 0.6) | 42.2 (55.2 to 31.8) | 2.3 (3.1 to 1.7) | 0.1 (0.2 to 0.1) | 7.3 (9.7 to 5.3) | 3 (3.9 to 2.2) | 0.8 (1 to 0.6) | 38.7 (49.2 to 29.5) |
| Israel | 26.4 (32.6 to 21.1) | 3.5 (4.1 to 3) | 189.2 (221.5 to 160.6) | 3.6 (4.9 to 2.6) | 0.5 (0.6 to 0.4) | 26.5 (34.6 to 19.9) | 1.5 (2 to 1.1) | 0.1 (0.1 to 0.1) | 5.7 (7.4 to 4.2) | 2.1 (2.7 to 1.6) | 0.5 (0.7 to 0.4) | 27.8 (35.6 to 21.5) |
| Italy | 33.2 (38.1 to 28.2) | 3.4 (3.6 to 3.2) | 187.6 (202.2 to 173.4) | 5.7 (6.9 to 4.7) | 0.6 (0.7 to 0.6) | 35.3 (39 to 32) | 4.2 (4.8 to 3.7) | 0.2 (0.2 to 0.2) | 10.8 (12.1 to 9.6) | 3.7 (4.3 to 3.1) | 0.8 (0.9 to 0.7) | 41.5 (45 to 38.2) |
| Jamaica | 34.7 (49.9 to 23.1) | 8.4 (11.8 to 5.8) | 427.1 (603.6 to 294.4) | 24.1 (36.3 to 15.2) | 5.4 (7.8 to 3.5) | 282 (411.8 to 182.8) | 4.5 (6.8 to 2.8) | 0.8 (1.3 to 0.5) | 43.6 (65.6 to 28.3) | 4.5 (6.7 to 2.9) | 1.4 (2 to 0.9) | 70.7 (103.8 to 45.6) |
| Japan | 27.6 (31.2 to 23.6) | 2.8 (2.9 to 2.7) | 153.5 (163.5 to 144.6) | 10.3 (12.2 to 8.5) | 1.2 (1.3 to 1.2) | 65.1 (68.7 to 61.7) | 3.7 (4.3 to 3.3) | 0.3 (0.3 to 0.3) | 16 (17 to 15.1) | 3.7 (4.2 to 3.2) | 0.9 (1 to 0.9) | 49 (51.3 to 46.8) |
| Jordan | 28.3 (43.5 to 17.4) | 4.1 (6.2 to 2.6) | 218.5 (328.4 to 136.1) | 1.8 (3 to 1) | 0.4 (0.7 to 0.3) | 22.2 (34.9 to 13.2) | 1.6 (2.8 to 0.9) | 0.1 (0.3 to 0.1) | 7.7 (13.8 to 4.2) | 2.2 (3.6 to 1.2) | 0.6 (1 to 0.3) | 32.4 (51 to 17.3) |
| Kazakhstan | 13.7 (16.7 to 10.9) | 3.4 (4 to 2.9) | 173.2 (202.4 to 145.7) | 13.8 (17 to 11.1) | 2.9 (3.4 to 2.5) | 151.6 (175.6 to 128.3) | 3 (3.6 to 2.5) | 0.4 (0.5 to 0.3) | 21.5 (24.8 to 18.3) | 3.9 (5 to 3) | 1.3 (1.6 to 1) | 67.9 (84.4 to 53.4) |
| Kenya | 13 (19.6 to 8.2) | 5.7 (8.5 to 3.6) | 287 (433.4 to 179.5) | 11 (15.8 to 7.4) | 4.1 (5.9 to 2.8) | 208.1 (298.3 to 141.6) | 0.5 (0.9 to 0.3) | 0.1 (0.3 to 0.1) | 7.3 (12.9 to 4.5) | 2.8 (4.1 to 1.5) | 0.9 (1.4 to 0.5) | 48.7 (71.7 to 27) |
| Kiribati | 19.3 (30.1 to 11.8) | 11 (17.1 to 6.7) | 561.6 (881.1 to 340.9) | 42.1 (69.1 to 24.1) | 16.8 (27.3 to 9.7) | 856 (1390.2 to 492.3) | 2.4 (4.7 to 0.8) | 0.8 (1.5 to 0.2) | 38.2 (74.8 to 12.3) | 1 (1.7 to 0.4) | 0.2 (0.4 to 0.1) | 12.6 (21.8 to 5.5) |
| Kuwait | 24.9 (32.4 to 18.8) | 2.5 (3.1 to 2) | 139.8 (175.6 to 109.2) | 1.3 (1.8 to 0.9) | 0.2 (0.3 to 0.2) | 12.3 (17.1 to 8.7) | 4.3 (5.9 to 3) | 0.3 (0.4 to 0.2) | 15.2 (20.7 to 11) | 2.1 (2.9 to 1.5) | 0.5 (0.7 to 0.4) | 28 (38.1 to 20.6) |
| Kyrgyzstan | 12.3 (16.4 to 9) | 3.5 (4.4 to 2.7) | 179.3 (228.7 to 136.1) | 12.8 (17.7 to 9) | 3.1 (4 to 2.2) | 158 (206.1 to 115.1) | 2.9 (4 to 2.1) | 0.5 (0.6 to 0.3) | 24.3 (32.5 to 17.5) | 4.6 (6.2 to 3.3) | 1.5 (2 to 1.1) | 80.5 (106.2 to 58.9) |
| Lao People's Democratic Republic | 13.2 (20.6 to 8) | 6 (9.3 to 3.7) | 301.6 (470.3 to 184.6) | 9.2 (15.2 to 5.1) | 3.4 (5.6 to 2) | 175.8 (288 to 99.8) | 1.8 (3.3 to 0.9) | 0.5 (0.8 to 0.2) | 23.1 (41.3 to 11.4) | 7 (13.3 to 3.4) | 1.5 (2.7 to 0.8) | 79.8 (145.4 to 39.9) |
| Latvia | 16.2 (21.1 to 12.1) | 3.6 (4.5 to 2.8) | 182.9 (231 to 139.2) | 6.1 (8.5 to 4.3) | 1.6 (2.1 to 1.1) | 79.7 (108 to 56.8) | 5.8 (8 to 4.1) | 0.4 (0.6 to 0.3) | 23 (30.9 to 16.7) | 3.9 (5.2 to 2.9) | 1.7 (2.2 to 1.3) | 83.6 (109.8 to 63) |
| Lebanon | 37.2 (53.6 to 24.7) | 4.7 (6.4 to 3.3) | 251 (346.9 to 171.4) | 2.6 (4.1 to 1.5) | 0.5 (0.8 to 0.3) | 28.1 (43.8 to 17.2) | 1.7 (2.8 to 0.9) | 0.1 (0.2 to 0.1) | 7 (12 to 3.9) | 3 (4.9 to 1.6) | 0.8 (1.3 to 0.5) | 43.6 (68.1 to 23.7) |
| Lesotho | 12.6 (21.5 to 6.5) | 6.7 (11.4 to 3.5) | 334.3 (568.1 to 175.1) | 30.8 (54.9 to 15) | 13.7 (24.1 to 6.8) | 679.9 (1193.6 to 333.2) | 0.8 (1.5 to 0.4) | 0.3 (0.5 to 0.1) | 14 (25.3 to 6.5) | 2.7 (5.5 to 1.3) | 1 (2 to 0.5) | 51.3 (101.6 to 23.9) |
| Liberia | 9.5 (15.7 to 5.4) | 4.3 (7.1 to 2.4) | 218.7 (364.2 to 123.5) | 19.8 (32.8 to 10.5) | 7 (11.5 to 3.9) | 369.5 (608.1 to 201.4) | 0.6 (1.1 to 0.3) | 0.2 (0.3 to 0.1) | 9 (16 to 4.6) | 1.4 (2.4 to 0.7) | 0.4 (0.8 to 0.2) | 23.8 (40.6 to 12.6) |
| Libya | 21.1 (33.4 to 12.6) | 4 (6.2 to 2.5) | 205 (324.9 to 126.9) | 8.6 (14.3 to 4.7) | 2.3 (3.7 to 1.3) | 121.5 (194.2 to 68.8) | 2 (3.6 to 1.1) | 0.2 (0.4 to 0.1) | 12.3 (21.3 to 6.5) | 3.5 (5.8 to 2) | 1.1 (1.8 to 0.6) | 55.9 (91.8 to 32.7) |
| Lithuania | 20.9 (27.3 to 15.7) | 3.8 (4.8 to 3) | 196.2 (247.8 to 150.8) | 11.8 (16.2 to 8.3) | 1.9 (2.5 to 1.4) | 98 (130.7 to 71.4) | 5.1 (6.9 to 3.6) | 0.4 (0.6 to 0.3) | 23.5 (31.2 to 16.9) | 4.4 (5.9 to 3.2) | 1.5 (2 to 1.1) | 75.7 (99.2 to 55.6) |
| Luxembourg | 25.5 (31.8 to 20.1) | 2.9 (3.4 to 2.5) | 160 (187.3 to 133.4) | 3.4 (4.4 to 2.7) | 0.4 (0.5 to 0.3) | 22.9 (27.6 to 18.9) | 2.7 (3.3 to 2.2) | 0.2 (0.2 to 0.1) | 9.1 (11 to 7.6) | 2.8 (3.5 to 2.2) | 0.7 (0.8 to 0.6) | 36.1 (43.6 to 29.7) |
| Madagascar | 11.8 (18.3 to 7.1) | 6 (9.2 to 3.7) | 304.5 (473.8 to 186.5) | 23.4 (38.4 to 12.6) | 9.6 (15.6 to 5.2) | 491.4 (801.1 to 267.5) | 0.7 (1.3 to 0.4) | 0.2 (0.4 to 0.1) | 12.3 (21.9 to 6.7) | 3.1 (5.4 to 1.6) | 1.1 (1.8 to 0.5) | 56.2 (97.3 to 28.9) |
| Malawi | 11.1 (17.7 to 6.4) | 5.4 (8.8 to 3.1) | 278.9 (452.3 to 159.2) | 30.6 (51.1 to 16.9) | 11.8 (19.2 to 6.6) | 617.9 (1011.6 to 342.6) | 0.5 (0.9 to 0.2) | 0.2 (0.3 to 0.1) | 8 (14.7 to 4) | 2.4 (4.4 to 0.9) | 0.8 (1.4 to 0.3) | 42.1 (76.4 to 16) |
| Malaysia | 29 (40.2 to 19.6) | 8 (10.9 to 5.6) | 404.1 (549.3 to 280.1) | 10.3 (15.5 to 6.3) | 2.6 (3.8 to 1.6) | 130.8 (192.7 to 82) | 1.9 (3 to 1.1) | 0.3 (0.4 to 0.2) | 13.1 (20.8 to 7.9) | 4 (7.3 to 2.3) | 0.8 (1.3 to 0.5) | 42.2 (72.1 to 25.1) |
| Maldives | 9.6 (14.9 to 6) | 2.3 (3.5 to 1.4) | 117.8 (180.3 to 74) | 3.4 (5.4 to 2) | 0.7 (1.1 to 0.5) | 38.7 (59 to 23.7) | 0.6 (1.2 to 0.3) | 0.1 (0.1 to 0) | 3.7 (6.8 to 2.1) | 6 (10.1 to 3.4) | 1.1 (1.8 to 0.6) | 58.1 (95.9 to 32.8) |
| Mali | 8.9 (14.2 to 5.2) | 4.4 (7.1 to 2.6) | 221.7 (355.8 to 129.8) | 18.4 (30.2 to 10.4) | 7 (11.3 to 4.1) | 371.4 (597.7 to 212.8) | 0.5 (0.9 to 0.2) | 0.2 (0.3 to 0.1) | 7.7 (14.3 to 4) | 0.7 (1.1 to 0.3) | 0.2 (0.4 to 0.1) | 12 (19.6 to 6) |
| Malta | 34.5 (43.8 to 26.7) | 4.7 (5.6 to 3.8) | 248.8 (300.2 to 203.3) | 4.4 (6.1 to 3.1) | 0.6 (0.8 to 0.4) | 31 (41.4 to 22.7) | 3.1 (4.1 to 2.3) | 0.2 (0.3 to 0.2) | 11.2 (14.8 to 8.3) | 4.1 (5.5 to 3.1) | 1.1 (1.4 to 0.8) | 55.8 (72.2 to 42.3) |
| Marshall Islands | 23 (40.5 to 11.5) | 11.6 (20.2 to 5.9) | 588.1 (1025 to 296.5) | 24.9 (42.3 to 12.3) | 8.7 (14.4 to 4.4) | 443 (738.9 to 222.4) | 4.1 (9.3 to 1.5) | 1.1 (2.4 to 0.4) | 53.2 (123.2 to 19.6) | 3.5 (7.2 to 1.5) | 0.8 (1.7 to 0.4) | 43.9 (87.3 to 19.5) |
| Mauritania | 10.8 (16.9 to 6.4) | 4.3 (6.6 to 2.6) | 215.9 (335.6 to 130.6) | 15.6 (26.3 to 8.5) | 5.1 (8.4 to 2.8) | 260.3 (435.2 to 143.6) | 0.6 (1.1 to 0.3) | 0.2 (0.3 to 0.1) | 7.6 (13.3 to 3.8) | 1.3 (2.3 to 0.6) | 0.4 (0.7 to 0.2) | 21.7 (37.1 to 10.4) |
| Mauritius | 26.9 (33.1 to 21.4) | 7.2 (8.4 to 6) | 369.4 (432 to 305.2) | 9 (11.3 to 7.1) | 2.1 (2.6 to 1.8) | 111.8 (132.9 to 91.2) | 5.7 (6.9 to 4.6) | 0.7 (0.9 to 0.6) | 39.1 (45.1 to 32.6) | 10.4 (13 to 8.2) | 1.9 (2.2 to 1.5) | 101.2 (120.5 to 83) |
| Mexico | 23.8 (28.4 to 19.4) | 4.1 (4.9 to 3.3) | 213.1 (255.6 to 173.7) | 17 (20.3 to 14) | 3 (3.6 to 2.5) | 161 (191.5 to 131.9) | 1.5 (1.8 to 1.2) | 0.3 (0.3 to 0.2) | 13.4 (16 to 11) | 5.4 (6.4 to 4.5) | 1.6 (1.9 to 1.3) | 84.1 (99.8 to 69.9) |
| Micronesia (Federated States of) | 22.9 (36.1 to 13.4) | 10.9 (16.8 to 6.5) | 549.7 (850.1 to 327.3) | 21.6 (35.7 to 11.9) | 7.1 (11.5 to 4.1) | 360.4 (587.6 to 206.4) | 3.6 (7.1 to 1.6) | 0.8 (1.7 to 0.4) | 42.7 (84.7 to 19.3) | 3.7 (6.9 to 1.6) | 0.9 (1.6 to 0.4) | 44.4 (83.9 to 19.5) |
| Monaco | 75.1 (114 to 46.6) | 8.5 (12.6 to 5.4) | 469.9 (705.5 to 297.1) | 10.2 (17.4 to 5.4) | 1.2 (1.9 to 0.6) | 64.8 (108.1 to 36.1) | 1.8 (3.2 to 0.9) | 0.1 (0.2 to 0.1) | 6.2 (10.7 to 3.3) | 4.2 (7.8 to 2.1) | 1 (1.8 to 0.5) | 51.5 (94.4 to 26.1) |
| Mongolia | 5.7 (7.9 to 3.9) | 2 (2.7 to 1.4) | 99.9 (136.4 to 69.6) | 11.7 (17.7 to 7.5) | 3.3 (4.7 to 2.2) | 167.6 (242.6 to 110.5) | 1.8 (2.8 to 1) | 0.3 (0.5 to 0.2) | 17.9 (27.7 to 10.7) | 3.4 (5 to 2.1) | 1.2 (1.8 to 0.8) | 62.9 (92.1 to 40.9) |
| Montenegro | 31.9 (43.4 to 22.7) | 5 (6.5 to 3.7) | 259.5 (339.1 to 194.5) | 11.3 (16.1 to 7.7) | 1.5 (2.1 to 1.1) | 82.5 (112.7 to 58.6) | 3.2 (4.7 to 2.2) | 0.3 (0.4 to 0.2) | 15.1 (21.5 to 10.3) | 3.3 (4.9 to 2.1) | 1 (1.5 to 0.7) | 53.1 (76.2 to 34.9) |
| Morocco | 15.6 (25.8 to 8.8) | 3.6 (6 to 2.1) | 186.1 (311.8 to 107.3) | 6.2 (10.7 to 3.4) | 2.1 (3.5 to 1.2) | 103.9 (174.5 to 58.6) | 0.5 (0.9 to 0.3) | 0.1 (0.1 to 0) | 3.8 (6.9 to 2) | 1.9 (3.4 to 1) | 0.6 (1.1 to 0.3) | 32 (55.6 to 16.6) |
| Mozambique | 11.1 (18.6 to 6.1) | 5.9 (9.7 to 3.3) | 307.3 (508.9 to 170.3) | 28.1 (51.6 to 14.6) | 12.2 (22.1 to 6.4) | 620.6 (1127 to 322.1) | 0.8 (1.7 to 0.4) | 0.3 (0.6 to 0.1) | 14.9 (30.5 to 6.6) | 3.5 (6.2 to 1.7) | 1.2 (2.1 to 0.6) | 63.5 (112.4 to 30.3) |
| Myanmar | 18.1 (27.4 to 11.4) | 7.3 (10.8 to 4.7) | 378.1 (564.9 to 239.8) | 8.7 (14.4 to 4.7) | 2.9 (4.8 to 1.7) | 150.6 (247 to 86.2) | 2 (3.6 to 1) | 0.4 (0.8 to 0.2) | 22.7 (39.7 to 11.8) | 7 (12.5 to 3.8) | 1.4 (2.4 to 0.8) | 76.4 (130.1 to 43.3) |
| Namibia | 19.7 (32.5 to 11) | 8.2 (13.1 to 4.6) | 406.8 (654.1 to 230.9) | 15.9 (28.1 to 8.2) | 5.4 (9 to 2.8) | 276.4 (466.5 to 142.4) | 0.8 (1.5 to 0.4) | 0.2 (0.3 to 0.1) | 9.7 (17.4 to 4.8) | 2.1 (3.8 to 1) | 0.7 (1.2 to 0.3) | 35.9 (64.9 to 18) |
| Nauru | 29.2 (52.7 to 14) | 13.6 (24.4 to 6.6) | 687 (1238.3 to 333.1) | 30.8 (51.5 to 15.7) | 9.8 (16.2 to 5) | 501.9 (834.3 to 255.1) | 4.3 (8.6 to 1.6) | 1 (2 to 0.4) | 49.9 (100.5 to 18.5) | 3.8 (7.9 to 1.5) | 0.9 (1.7 to 0.4) | 45.1 (91.8 to 18.5) |
| Nepal | 7.5 (12 to 4.4) | 3 (4.8 to 1.8) | 154.9 (247.3 to 91.6) | 9.9 (16.3 to 5.5) | 3.4 (5.3 to 1.9) | 171.4 (275.1 to 98.1) | 0.4 (1 to 0.2) | 0.1 (0.2 to 0) | 5.2 (11.7 to 2.3) | 2.5 (4.7 to 1.3) | 0.8 (1.5 to 0.4) | 41.6 (77.5 to 21.9) |
| Netherlands | 34.4 (42.9 to 27.1) | 3.8 (4.4 to 3.2) | 209.9 (247.8 to 175.3) | 5.8 (7.9 to 4.2) | 0.6 (0.8 to 0.5) | 35.4 (45.8 to 26.7) | 1.6 (2.1 to 1.2) | 0.1 (0.2 to 0.1) | 7.3 (9.4 to 5.5) | 2.6 (3.3 to 2) | 0.7 (0.9 to 0.6) | 36.8 (46.3 to 28.8) |
| New Zealand | 34.3 (41 to 28.5) | 4.5 (5.2 to 4) | 243.3 (277.9 to 211.1) | 4.5 (5.8 to 3.5) | 0.8 (1 to 0.6) | 41.9 (51.6 to 33.7) | 2.4 (3.1 to 1.9) | 0.2 (0.3 to 0.2) | 12.7 (15.6 to 10.3) | 2.8 (3.6 to 2.2) | 0.7 (0.9 to 0.5) | 35.8 (45 to 28.6) |
| Nicaragua | 14.4 (20.9 to 9.5) | 2.6 (3.6 to 1.7) | 134.6 (192.7 to 90.1) | 22.1 (33 to 14.4) | 4.1 (5.9 to 2.8) | 215.4 (311.8 to 144) | 0.7 (1.2 to 0.4) | 0.1 (0.2 to 0.1) | 6.5 (10.6 to 3.8) | 2.4 (3.7 to 1.4) | 0.7 (1.1 to 0.4) | 37.1 (56.6 to 22.6) |
| Niger | 4.6 (7.7 to 2.5) | 2.4 (4.1 to 1.3) | 122.3 (208.4 to 65.8) | 15 (26.1 to 8.2) | 6.3 (10.8 to 3.5) | 325 (567.8 to 179.7) | 0.3 (0.6 to 0.2) | 0.1 (0.2 to 0.1) | 5.6 (10 to 2.9) | 0.7 (1.3 to 0.4) | 0.2 (0.4 to 0.1) | 12.9 (22.4 to 6.6) |
| Nigeria | 14.1 (22.6 to 8.2) | 6.3 (9.9 to 3.8) | 314 (494.7 to 188.1) | 11 (18 to 6.1) | 4 (6.3 to 2.3) | 209.8 (332.4 to 118.9) | 0.3 (0.5 to 0.2) | 0.1 (0.1 to 0) | 3.7 (6.4 to 2.2) | 1.3 (2.2 to 0.7) | 0.4 (0.7 to 0.2) | 23.3 (36.6 to 12.1) |
| Niue | 32.6 (49.7 to 20.4) | 11.4 (17 to 7.2) | 603.5 (902.6 to 382.1) | 18.8 (30.1 to 10.9) | 4.4 (6.8 to 2.6) | 232.7 (366 to 139.6) | 4.4 (9 to 1.9) | 0.7 (1.4 to 0.3) | 38.4 (77.2 to 17.1) | 5.6 (9.7 to 2.7) | 1 (1.8 to 0.5) | 55.8 (97.2 to 27.9) |
| North Macedonia | 23.4 (32.7 to 16.3) | 4.6 (6.2 to 3.3) | 235.5 (318 to 170.3) | 10.2 (14.8 to 6.6) | 1.7 (2.4 to 1.2) | 89.7 (126.3 to 60.4) | 3.5 (5.2 to 2.2) | 0.4 (0.6 to 0.2) | 19.9 (29.4 to 12.7) | 3.9 (5.7 to 2.4) | 1.3 (1.8 to 0.8) | 65.9 (94.8 to 42.6) |
| Northern Mariana Islands | 25.3 (35.7 to 16.8) | 7.7 (10.6 to 5.2) | 394.4 (547.8 to 267.8) | 22.3 (33.6 to 14) | 5 (7.3 to 3.2) | 254.2 (374.6 to 163.5) | 7.2 (11.7 to 4.3) | 1 (1.5 to 0.6) | 49.5 (76.9 to 30) | 4.5 (6.9 to 2.7) | 0.9 (1.4 to 0.6) | 47.5 (71.7 to 29.5) |
| Norway | 21.8 (25.7 to 18.3) | 2.4 (2.6 to 2.3) | 133.2 (146.3 to 121.2) | 7.6 (9.2 to 6.1) | 0.9 (1 to 0.8) | 49.2 (55.6 to 43.6) | 2 (2.4 to 1.7) | 0.1 (0.1 to 0.1) | 6.5 (7.4 to 5.7) | 2.8 (3.3 to 2.4) | 0.7 (0.7 to 0.6) | 34.5 (37.9 to 31.3) |
| Oman | 6.4 (10 to 3.9) | 0.9 (1.4 to 0.5) | 46.7 (72.1 to 29.2) | 2 (3.3 to 1.2) | 0.4 (0.7 to 0.3) | 22.9 (36.2 to 13.5) | 0.3 (0.6 to 0.2) | 0 (0.1 to 0) | 1.6 (3 to 0.8) | 0.8 (1.4 to 0.5) | 0.2 (0.4 to 0.1) | 12.4 (20.5 to 6.7) |
| Pakistan | 20.9 (30.9 to 13.6) | 9.5 (13.8 to 6.3) | 498.8 (727.8 to 327.1) | 5.7 (8.6 to 3.5) | 2 (3 to 1.3) | 106.9 (159.5 to 67.3) | 1.7 (2.6 to 1) | 0.5 (0.7 to 0.3) | 24.4 (39 to 14.4) | 5.5 (8.7 to 2.9) | 1.7 (2.7 to 0.9) | 92.5 (146.7 to 50.5) |
| Palau | 33.4 (51.4 to 20.8) | 11.6 (17.4 to 7.4) | 622.9 (941.2 to 391.5) | 36.8 (58.5 to 22) | 8.9 (13.8 to 5.5) | 470.5 (731.4 to 289.9) | 0.5 (0.9 to 0.3) | 0.1 (0.1 to 0) | 4.7 (8 to 2.3) | 1 (1.6 to 0.5) | 0.2 (0.3 to 0.1) | 9.7 (15.9 to 5.2) |
| Palestine | 30.1 (41.9 to 20.8) | 5.3 (7.1 to 3.9) | 282.7 (380.8 to 203.3) | 0.8 (1.3 to 0.5) | 0.2 (0.3 to 0.1) | 11.4 (17.3 to 6.9) | 3.1 (5.2 to 1.7) | 0.3 (0.6 to 0.2) | 18.3 (30.6 to 10.2) | 2.3 (3.5 to 1.4) | 0.6 (1 to 0.4) | 34.3 (52.1 to 21.2) |
| Panama | 36.5 (50.5 to 25.5) | 4.6 (6.1 to 3.4) | 251.3 (333.5 to 181.4) | 26 (36.4 to 17.6) | 3.7 (5 to 2.7) | 202.4 (272.5 to 143.2) | 2.4 (3.4 to 1.6) | 0.3 (0.5 to 0.2) | 18.1 (24.7 to 12.7) | 4.1 (5.4 to 3.1) | 1.1 (1.4 to 0.8) | 59.9 (76.4 to 45.5) |
| Papua New Guinea | 15.3 (24.4 to 9.1) | 7.9 (12.4 to 4.7) | 404.5 (636.2 to 241) | 15.7 (28.2 to 8.8) | 5.6 (10.1 to 3.2) | 286.6 (515.8 to 164.5) | 1.8 (3.6 to 0.8) | 0.5 (1 to 0.2) | 24.3 (50.4 to 10.3) | 2 (3.7 to 0.9) | 0.5 (0.9 to 0.2) | 24.8 (45.3 to 10.8) |
| Paraguay | 17.7 (27 to 11.1) | 4.8 (7.1 to 3.1) | 243.4 (363.9 to 157.7) | 25.4 (39.1 to 15.4) | 6.1 (9.3 to 3.9) | 320.2 (485 to 202.5) | 1.6 (2.7 to 0.9) | 0.3 (0.5 to 0.2) | 15.1 (25.1 to 8.3) | 2.6 (4.2 to 1.5) | 0.8 (1.2 to 0.4) | 40.3 (64.8 to 23.7) |
| Peru | 14.9 (22.5 to 9.4) | 3.2 (4.9 to 2.1) | 167.4 (251.2 to 106.7) | 19.4 (29.9 to 11.8) | 4.1 (6.2 to 2.6) | 213.9 (319.5 to 133.5) | 2.3 (3.8 to 1.3) | 0.3 (0.5 to 0.2) | 17.4 (27.9 to 9.7) | 4 (6.3 to 2.4) | 1.1 (1.7 to 0.7) | 58.3 (92.1 to 35.9) |
| Philippines | 21.8 (28.5 to 16.4) | 8.4 (10.8 to 6.3) | 421.5 (546.9 to 318.3) | 9.1 (12.2 to 6.6) | 2.9 (3.8 to 2.2) | 149.3 (194.2 to 111) | 2.3 (3.1 to 1.5) | 0.5 (0.6 to 0.3) | 23.9 (31.4 to 15.3) | 9.4 (12.9 to 6) | 1.9 (2.5 to 1.2) | 100.9 (134.2 to 65.1) |
| Poland | 21.6 (26.3 to 17.6) | 3.6 (4.1 to 3.1) | 190.2 (216.2 to 163.4) | 6.1 (7.4 to 5) | 1.3 (1.4 to 1.1) | 65.3 (74 to 56) | 3.1 (3.8 to 2.6) | 0.3 (0.3 to 0.2) | 15.2 (17.4 to 12.9) | 4.2 (5 to 3.5) | 1.4 (1.6 to 1.2) | 71.3 (80.9 to 61.5) |
| Portugal | 34.4 (43.1 to 26.9) | 3.8 (4.5 to 3.2) | 211.3 (252.2 to 174.9) | 9.1 (12.2 to 6.5) | 1.1 (1.4 to 0.9) | 62.1 (79.8 to 47.1) | 2.9 (3.9 to 2.1) | 0.2 (0.2 to 0.1) | 9.6 (12.7 to 7.2) | 1.8 (2.4 to 1.4) | 0.6 (0.7 to 0.4) | 28.5 (36 to 22.2) |
| Puerto Rico | 27.1 (35.9 to 19.5) | 3.9 (5 to 2.9) | 206.7 (266.8 to 154.5) | 9.4 (13.5 to 6.3) | 1.4 (2 to 1) | 76.7 (105.2 to 54.4) | 4.1 (5.7 to 2.9) | 0.5 (0.6 to 0.3) | 24.8 (33.4 to 17.8) | 3.7 (5.1 to 2.6) | 1 (1.3 to 0.7) | 51.9 (69.6 to 38.2) |
| Qatar | 35.3 (54.7 to 22.1) | 3.6 (5.4 to 2.3) | 201.7 (308.8 to 129.7) | 1.7 (2.8 to 0.9) | 0.3 (0.5 to 0.2) | 16.1 (25.8 to 9.4) | 2.2 (4.4 to 1.2) | 0.1 (0.3 to 0.1) | 8.2 (16.3 to 4.3) | 2.9 (4.9 to 1.5) | 0.7 (1.2 to 0.4) | 38.7 (65.3 to 20.1) |
| Republic of Korea | 24.8 (33.3 to 18) | 2.7 (3.4 to 2) | 147.2 (190.9 to 111.9) | 7.4 (11.1 to 4.7) | 0.9 (1.3 to 0.6) | 47.1 (68.6 to 31.7) | 1.7 (2.6 to 1) | 0.1 (0.2 to 0.1) | 7.6 (11.5 to 4.3) | 3 (4.2 to 2) | 0.8 (1 to 0.5) | 40.4 (54.8 to 27.6) |
| Republic of Moldova | 16.7 (21.4 to 13) | 3.8 (4.6 to 3.1) | 192.1 (233.2 to 158.6) | 11.7 (14.7 to 9.2) | 2.9 (3.4 to 2.4) | 147.5 (177.1 to 121.5) | 3.1 (3.9 to 2.5) | 0.3 (0.3 to 0.2) | 15.2 (18.1 to 12.7) | 2.3 (2.8 to 1.8) | 0.9 (1.1 to 0.7) | 42.7 (52.2 to 34.2) |
| Romania | 21.8 (28.5 to 16.4) | 4.3 (5.4 to 3.4) | 222.2 (276.9 to 173.8) | 19.3 (26 to 13.9) | 3.6 (4.6 to 2.7) | 186.2 (239.4 to 141.7) | 3.1 (4.2 to 2.2) | 0.3 (0.4 to 0.2) | 17.8 (23.6 to 13.1) | 3.8 (5 to 2.8) | 1.2 (1.6 to 0.9) | 63.8 (80.9 to 48.4) |
| Russian Federation | 21 (23.6 to 18.3) | 4.2 (4.7 to 3.6) | 217 (243.9 to 188.9) | 17.9 (20.1 to 15.5) | 3.5 (3.9 to 3) | 183.9 (206.7 to 160.2) | 7.5 (8.5 to 6.4) | 0.6 (0.6 to 0.5) | 31.2 (35.5 to 27) | 4.6 (5.2 to 4) | 1.4 (1.6 to 1.2) | 72.6 (81.9 to 63.6) |
| Rwanda | 12.9 (21 to 7.5) | 6.1 (9.8 to 3.6) | 312.5 (503.7 to 184.4) | 20.1 (33.3 to 10.8) | 7.8 (12.7 to 4.3) | 397.8 (652 to 215.5) | 0.7 (1.3 to 0.4) | 0.2 (0.4 to 0.1) | 10.9 (19.5 to 5.6) | 4.1 (7.1 to 2) | 1.3 (2.3 to 0.7) | 71.6 (122.6 to 35.9) |
| Saint Kitts and Nevis | 19.2 (26.3 to 13.3) | 5.1 (6.8 to 3.6) | 256 (342.5 to 182.8) | 13.9 (19.2 to 9.4) | 3.4 (4.7 to 2.4) | 177.7 (241.3 to 126) | 2.8 (3.9 to 2) | 0.6 (0.8 to 0.4) | 29.9 (39.5 to 21.2) | 3.5 (4.8 to 2.4) | 1.1 (1.4 to 0.7) | 55.1 (74.4 to 38.8) |
| Saint Lucia | 27.3 (35.9 to 20.3) | 7 (8.9 to 5.4) | 357.3 (453.5 to 274.7) | 21.5 (28.8 to 15.7) | 5.1 (6.5 to 3.9) | 264.3 (339 to 201.5) | 3.6 (4.7 to 2.7) | 0.7 (0.9 to 0.6) | 37.3 (47 to 28.8) | 5.9 (7.8 to 4.4) | 1.8 (2.3 to 1.3) | 94 (120.3 to 70.3) |
| Saint Vincent and the Grenadines | 32.7 (41.9 to 25) | 9.5 (11.7 to 7.5) | 479.6 (594.8 to 378.7) | 33 (42.3 to 24.8) | 8.7 (10.8 to 6.9) | 449.3 (558.3 to 353.9) | 3.9 (5.5 to 2.4) | 0.9 (1.2 to 0.6) | 44.8 (63 to 28.6) | 6.5 (8.8 to 4.8) | 2 (2.6 to 1.5) | 105.2 (136.8 to 80.2) |
| Samoa | 15.5 (24.8 to 9) | 6.4 (9.8 to 3.8) | 316.1 (488.7 to 187.8) | 21 (34.9 to 11.2) | 5.7 (9.3 to 3.1) | 295.6 (489.9 to 161.4) | 3 (5.6 to 1.4) | 0.6 (1 to 0.3) | 28.3 (50.7 to 14) | 3.6 (6.1 to 1.9) | 0.8 (1.3 to 0.4) | 41.1 (68.9 to 21.7) |
| San Marino | 21.3 (35.8 to 10.4) | 2.4 (3.9 to 1.2) | 130.1 (214.8 to 66.8) | 2.5 (4.5 to 1.2) | 0.3 (0.5 to 0.1) | 16.5 (29.7 to 7.7) | 0.6 (1.1 to 0.3) | 0 (0.1 to 0) | 1.9 (3.5 to 0.9) | 1.6 (2.8 to 0.8) | 0.4 (0.7 to 0.2) | 20.3 (35.3 to 10) |
| Sao Tome and Principe | 12.2 (19.7 to 7.1) | 4.8 (7.6 to 2.8) | 241.2 (387.5 to 140.8) | 24.7 (41.9 to 13.4) | 7.9 (12.9 to 4.4) | 407.4 (675.5 to 223.9) | 0.8 (1.6 to 0.4) | 0.2 (0.4 to 0.1) | 9.9 (18.8 to 4.8) | 2.8 (5.4 to 1.2) | 0.8 (1.5 to 0.4) | 44.5 (85.1 to 19.7) |
| Saudi Arabia | 20.8 (33 to 12.5) | 4 (6 to 2.5) | 205.7 (312.4 to 126.7) | 2.9 (5.1 to 1.6) | 0.3 (0.5 to 0.2) | 17.4 (29.2 to 10) | 1.7 (2.8 to 0.9) | 0.1 (0.3 to 0.1) | 8.1 (13.8 to 4.4) | 2.2 (3.8 to 1.2) | 0.6 (1.1 to 0.4) | 33.3 (55.7 to 18) |
| Senegal | 9.7 (15.8 to 5.7) | 4.5 (7.3 to 2.7) | 226.5 (369.8 to 136.2) | 16.8 (27.6 to 9.7) | 6.1 (9.9 to 3.6) | 318.7 (515.6 to 185) | 0.6 (1.1 to 0.3) | 0.2 (0.3 to 0.1) | 8.7 (15.6 to 4.4) | 1.4 (2.4 to 0.7) | 0.4 (0.8 to 0.2) | 24 (40.4 to 11.9) |
| Serbia | 26.6 (35.9 to 18.6) | 4.6 (6 to 3.4) | 237.5 (311.6 to 176.7) | 14.4 (21.3 to 9) | 2.4 (3.5 to 1.6) | 126.3 (182.5 to 81.9) | 2.6 (4.2 to 1.5) | 0.3 (0.4 to 0.2) | 14.8 (23.6 to 8.5) | 3.6 (5.4 to 2.2) | 1.2 (1.8 to 0.8) | 61.9 (90.2 to 39.1) |
| Seychelles | 23.8 (33.4 to 16.1) | 6.8 (9.3 to 4.7) | 354.5 (485.6 to 245.3) | 20.4 (30.4 to 13) | 5 (7.2 to 3.3) | 264.4 (379.6 to 173.4) | 3 (4.7 to 1.8) | 0.4 (0.7 to 0.3) | 22.5 (35.5 to 13.5) | 12.8 (20.1 to 7.8) | 2.2 (3.4 to 1.4) | 124.3 (190.2 to 77.4) |
| Sierra Leone | 8.8 (14.3 to 5.1) | 4.3 (6.8 to 2.5) | 218.2 (345.7 to 123.5) | 18.4 (30.4 to 10.3) | 7 (11.4 to 4) | 367.6 (603 to 207.9) | 0.5 (0.8 to 0.2) | 0.1 (0.2 to 0.1) | 7.1 (11.9 to 3.8) | 1.1 (1.9 to 0.6) | 0.4 (0.6 to 0.2) | 20 (33.5 to 10.6) |
| Singapore | 22 (27.7 to 17.3) | 2.4 (2.9 to 2.1) | 134.3 (159.1 to 111.3) | 4.4 (5.9 to 3.1) | 0.6 (0.7 to 0.4) | 30.1 (38.9 to 22.5) | 1.5 (2 to 1.1) | 0.1 (0.2 to 0.1) | 7 (9.2 to 5.3) | 3.1 (4.1 to 2.3) | 0.8 (1 to 0.6) | 40.5 (51.2 to 31.5) |
| Slovakia | 18.6 (26.2 to 12.5) | 3.3 (4.5 to 2.3) | 172.7 (237.1 to 121.5) | 10.8 (16.5 to 6.6) | 1.8 (2.6 to 1.1) | 93.8 (138.3 to 60.2) | 3.7 (6 to 2.1) | 0.4 (0.6 to 0.2) | 21.4 (33.7 to 12.4) | 3.9 (6 to 2.4) | 1.2 (1.9 to 0.8) | 63.6 (94.9 to 39) |
| Slovenia | 19.7 (26.3 to 14.1) | 2.2 (2.8 to 1.6) | 118.6 (154.8 to 89.8) | 17.7 (24.8 to 11.8) | 0.7 (0.9 to 0.5) | 41.9 (58.4 to 29.3) | 3.7 (5 to 2.5) | 0.2 (0.3 to 0.2) | 12.9 (17.8 to 9.2) | 2.5 (3.5 to 1.8) | 0.8 (1 to 0.6) | 39.9 (53.5 to 29.2) |
| Solomon Islands | 16.4 (26.2 to 9.5) | 8.6 (13.9 to 5) | 431.9 (695.8 to 248.4) | 22.5 (37.3 to 12.6) | 8.3 (13.5 to 4.8) | 418.8 (682.7 to 241.3) | 2.7 (5.1 to 1.3) | 0.7 (1.4 to 0.4) | 37.1 (68.9 to 17.5) | 2.6 (4.7 to 1.2) | 0.6 (1.2 to 0.3) | 33.2 (60.4 to 15.9) |
| Somalia | 6.3 (10.7 to 3.4) | 3.8 (6.4 to 2.1) | 191.1 (319.4 to 104.6) | 26.8 (45.3 to 14.7) | 13.3 (22.3 to 7.5) | 667.6 (1117.9 to 376.1) | 0.6 (1.1 to 0.3) | 0.2 (0.5 to 0.1) | 12.1 (22.8 to 5.5) | 2 (3.6 to 1) | 0.8 (1.4 to 0.4) | 39.1 (71.3 to 20.2) |
| South Africa | 17.2 (21 to 13.7) | 6.5 (7.8 to 5.2) | 325.6 (395.9 to 262) | 28.7 (35.2 to 22.7) | 9.1 (10.9 to 7.3) | 461.5 (555.1 to 370.9) | 0.9 (1.3 to 0.7) | 0.2 (0.3 to 0.1) | 9.4 (14.3 to 7.2) | 2.8 (3.7 to 2.1) | 0.9 (1.2 to 0.7) | 48 (61.6 to 36) |
| South Sudan | 8 (12.8 to 4.6) | 4.1 (6.4 to 2.4) | 206.3 (324.1 to 120.9) | 25 (41.9 to 13.8) | 10.4 (17.2 to 5.9) | 527 (879.4 to 297.6) | 0.8 (1.4 to 0.4) | 0.2 (0.5 to 0.1) | 12.6 (23 to 6.2) | 2.5 (4.3 to 1.3) | 0.9 (1.5 to 0.5) | 45.6 (77.9 to 24) |
| Spain | 26.8 (33.5 to 21.3) | 3.1 (3.6 to 2.6) | 166.9 (196.9 to 140.7) | 6 (8.1 to 4.3) | 0.7 (0.8 to 0.5) | 35.9 (46.8 to 27.2) | 2.8 (3.7 to 2) | 0.1 (0.2 to 0.1) | 8.4 (11 to 6.2) | 2.9 (3.8 to 2.2) | 0.6 (0.8 to 0.5) | 33 (41.3 to 25.6) |
| Sri Lanka | 13.9 (22.3 to 7.4) | 3.2 (5.1 to 1.8) | 165.5 (263.1 to 92.9) | 4.3 (7.3 to 2.2) | 0.9 (1.5 to 0.5) | 48 (80.3 to 24.5) | 1.4 (2.5 to 0.7) | 0.2 (0.3 to 0.1) | 8.4 (15 to 3.9) | 4.5 (7.5 to 2.3) | 0.7 (1.3 to 0.4) | 41.2 (70 to 21.2) |
| Sudan | 11.5 (20.2 to 5.4) | 3.1 (5.4 to 1.5) | 157.7 (278.4 to 77.3) | 3 (5.4 to 1.4) | 1 (1.8 to 0.5) | 54.1 (93.9 to 25.7) | 1 (1.7 to 0.4) | 0.2 (0.3 to 0.1) | 8.3 (14.7 to 3.8) | 1.6 (3 to 0.7) | 0.5 (0.9 to 0.2) | 26.2 (48.5 to 12.5) |
| Suriname | 16.3 (24.1 to 10.3) | 5.3 (7.8 to 3.5) | 274 (400.2 to 178.3) | 24.5 (37.1 to 15.1) | 6.9 (10.3 to 4.4) | 364.1 (542.5 to 229.6) | 1.8 (3 to 1) | 0.5 (0.8 to 0.3) | 24 (40.1 to 13.7) | 5.3 (8.4 to 3.1) | 1.6 (2.5 to 1) | 86.5 (137.6 to 52.2) |
| Sweden | 20.4 (25.9 to 15.7) | 2.2 (2.7 to 1.8) | 122.7 (151.7 to 96.9) | 5.7 (7.7 to 4.2) | 0.7 (0.9 to 0.5) | 38 (49.3 to 28.9) | 1.6 (2.1 to 1.2) | 0.1 (0.1 to 0.1) | 4.5 (5.9 to 3.3) | 2.6 (3.3 to 1.9) | 0.6 (0.8 to 0.5) | 31.8 (40.1 to 24.6) |
| Switzerland | 20.2 (25.4 to 15.7) | 2.2 (2.6 to 1.8) | 120.3 (145.2 to 98.6) | 4.4 (6.1 to 3.1) | 0.5 (0.6 to 0.4) | 26.8 (35 to 20.1) | 2.4 (3.2 to 1.8) | 0.1 (0.2 to 0.1) | 7.3 (9.6 to 5.5) | 1.7 (2.3 to 1.3) | 0.4 (0.5 to 0.3) | 20.7 (26.8 to 15.7) |
| Syrian Arab Republic | 22.5 (33.9 to 14.3) | 3.7 (5.4 to 2.4) | 195.8 (289.2 to 128.5) | 1.8 (2.8 to 1) | 0.4 (0.7 to 0.3) | 23.1 (35.3 to 14.1) | 1.5 (2.4 to 0.9) | 0.2 (0.2 to 0.1) | 8.3 (13 to 5) | 1.7 (2.7 to 1) | 0.5 (0.7 to 0.3) | 24.9 (39 to 15) |
| Taiwan (Province of China) | 28.9 (36.6 to 22.2) | 4.1 (4.9 to 3.3) | 215 (258.2 to 175.6) | 7.2 (9.8 to 5.1) | 1.1 (1.4 to 0.8) | 57.1 (74.9 to 42.6) | 3.6 (4.9 to 2.6) | 0.2 (0.3 to 0.2) | 13.2 (17.5 to 9.9) | 6.2 (8.3 to 4.6) | 0.9 (1.2 to 0.7) | 51 (65.6 to 39.3) |
| Tajikistan | 10.1 (16.8 to 5.5) | 3.8 (6.2 to 2.1) | 194.5 (319 to 106.3) | 4.3 (7 to 2.4) | 1.3 (2 to 0.7) | 65.4 (105.4 to 37.6) | 1.9 (4 to 0.9) | 0.4 (0.9 to 0.2) | 22.3 (46 to 10.4) | 1.4 (2.2 to 0.8) | 0.5 (0.8 to 0.3) | 26.6 (41.2 to 15.4) |
| Thailand | 27.3 (39.9 to 18) | 5.9 (8.4 to 4) | 311.6 (445.4 to 210.8) | 16.4 (26.1 to 9.9) | 3.2 (4.9 to 2) | 170.6 (261.8 to 105.7) | 2.4 (4.1 to 1.3) | 0.2 (0.4 to 0.1) | 13.7 (22.6 to 7.3) | 8.2 (13 to 4) | 1.4 (2.1 to 0.7) | 74.5 (116.3 to 37.3) |
| Timor-Leste | 9.4 (14.7 to 5.7) | 4.2 (6.5 to 2.6) | 208.4 (324.7 to 127.2) | 7.1 (11.9 to 4) | 2.6 (4.3 to 1.5) | 133.5 (219.6 to 76.1) | 1.3 (2.4 to 0.7) | 0.3 (0.6 to 0.2) | 16.3 (29.8 to 8.2) | 4.8 (8.5 to 2.5) | 1 (1.7 to 0.5) | 54.9 (92.5 to 28.8) |
| Togo | 10.6 (17.3 to 6.1) | 4.9 (8.1 to 2.8) | 250.3 (414.7 to 142.8) | 19.1 (31.5 to 10.5) | 7 (11.2 to 3.9) | 363.7 (590.2 to 201.6) | 0.6 (1 to 0.3) | 0.2 (0.3 to 0.1) | 8.3 (14 to 4.3) | 1.4 (2.4 to 0.7) | 0.4 (0.8 to 0.2) | 24 (41.6 to 12) |
| Tokelau | 33.5 (50.9 to 20.7) | 12.3 (18.2 to 7.7) | 649.6 (963.6 to 407.5) | 23.9 (38.5 to 13.7) | 5.8 (9.2 to 3.4) | 310.5 (488.3 to 182.6) | 4.4 (7.8 to 2.1) | 0.8 (1.3 to 0.4) | 40.6 (71.6 to 19.8) | 5.3 (9 to 2.7) | 1 (1.6 to 0.5) | 53.2 (90.2 to 27) |
| Tonga | 28.3 (42.9 to 17.4) | 10.9 (16.1 to 6.9) | 552.2 (819.2 to 349.2) | 22.2 (36.4 to 12.8) | 6 (9.6 to 3.5) | 304.4 (488.9 to 178.7) | 2.7 (4.8 to 1.3) | 0.5 (0.9 to 0.2) | 24.3 (44 to 12) | 2.4 (4.2 to 1.1) | 0.5 (0.9 to 0.2) | 26.6 (47.3 to 12.4) |
| Trinidad and Tobago | 30.7 (42.7 to 21.2) | 7.9 (10.6 to 5.5) | 400.5 (544.8 to 281.8) | 22.6 (32.1 to 15.2) | 5.2 (7.2 to 3.6) | 275.4 (376.5 to 190.6) | 4.9 (6.8 to 3.3) | 1 (1.3 to 0.7) | 50.2 (69.3 to 34.2) | 6.5 (9.1 to 4.4) | 2 (2.7 to 1.3) | 103 (139.9 to 70.7) |
| Tunisia | 22.5 (34.9 to 13.3) | 3.3 (5.1 to 2.1) | 176.5 (268.9 to 109.1) | 4.2 (6.9 to 2.3) | 1 (1.5 to 0.5) | 50.2 (82.1 to 28.2) | 1 (1.8 to 0.5) | 0.1 (0.2 to 0) | 5.1 (8.7 to 2.6) | 2.3 (3.8 to 1.2) | 0.6 (1.1 to 0.4) | 33.9 (55.2 to 18.9) |
| Turkmenistan | 16.1 (22.2 to 11.5) | 5.2 (7.1 to 3.8) | 263.6 (361.5 to 193.2) | 12.2 (17 to 8.7) | 3.2 (4.4 to 2.3) | 164.5 (226.4 to 118.9) | 1.6 (2.2 to 1.2) | 0.3 (0.4 to 0.2) | 15.5 (20.9 to 11.5) | 4.2 (5.9 to 2.9) | 1.4 (2 to 1) | 74.2 (103.6 to 53.5) |
| Tuvalu | 21.8 (34.8 to 12.7) | 9.9 (15.5 to 5.9) | 499.2 (786 to 294.8) | 20.9 (34.3 to 11.8) | 6.6 (10.6 to 3.7) | 334.8 (542.2 to 189.7) | 3.3 (6.2 to 1.6) | 0.7 (1.4 to 0.3) | 37.2 (68.4 to 17.3) | 3.1 (5.6 to 1.5) | 0.7 (1.2 to 0.4) | 37.5 (64.9 to 18.4) |
| T眉rkiye | 27.7 (39.2 to 18.5) | 3.9 (5.4 to 2.7) | 212.3 (293.4 to 146.4) | 2.3 (3.6 to 1.4) | 0.5 (0.8 to 0.3) | 27.2 (41.6 to 16.8) | 2.5 (4 to 1.4) | 0.2 (0.3 to 0.1) | 11.9 (18.9 to 6.7) | 3.4 (5.1 to 2.1) | 0.9 (1.4 to 0.6) | 49.4 (72.1 to 30.2) |
| Uganda | 14.4 (22.5 to 8.7) | 6.8 (10.4 to 4.2) | 344.5 (530.6 to 209.9) | 21.4 (34.5 to 12) | 8.1 (12.6 to 4.7) | 416.2 (654.2 to 240) | 1.1 (2 to 0.6) | 0.3 (0.6 to 0.2) | 17 (29.7 to 8.7) | 4.3 (7.4 to 2.1) | 1.4 (2.3 to 0.7) | 74.9 (124.1 to 38.2) |
| Ukraine | 14.7 (24.2 to 8) | 4.2 (6.8 to 2.3) | 213.1 (345.2 to 114.3) | 4.7 (7.8 to 2.5) | 1.3 (2.1 to 0.7) | 65.2 (107.3 to 35) | 4.2 (6.9 to 2.2) | 0.6 (0.9 to 0.3) | 29.4 (47.7 to 16.2) | 4.4 (7.3 to 2.4) | 1.5 (2.5 to 0.8) | 78.5 (126.6 to 42.2) |
| United Arab Emirates | 22.7 (34.8 to 14) | 4 (5.9 to 2.5) | 211.7 (317.8 to 134.3) | 3.8 (6 to 2.2) | 1 (1.5 to 0.6) | 50.9 (80.4 to 30.4) | 3 (5.3 to 1.7) | 0.3 (0.6 to 0.2) | 18.4 (31.9 to 10.4) | 5.3 (8.7 to 3) | 1.4 (2.3 to 0.8) | 76.7 (123.3 to 45) |
| United Kingdom | 30 (31.8 to 28.2) | 3.7 (3.9 to 3.6) | 203.2 (214.1 to 193.8) | 11.1 (12.5 to 10) | 1 (1 to 0.9) | 55 (58.8 to 51.9) | 2.4 (2.6 to 2.3) | 0.2 (0.2 to 0.2) | 9.4 (10 to 8.8) | 4 (4.3 to 3.8) | 0.8 (0.9 to 0.8) | 43.3 (45.4 to 41.4) |
| United Republic of Tanzania | 12.9 (20.6 to 7.6) | 5.9 (9.4 to 3.6) | 309.2 (492.4 to 183.6) | 18.9 (30.7 to 10.8) | 7.2 (11.3 to 4.2) | 368.2 (582.3 to 210.6) | 0.8 (1.4 to 0.4) | 0.2 (0.4 to 0.1) | 11.5 (20.4 to 6.3) | 3.6 (6.1 to 1.9) | 1.2 (1.9 to 0.6) | 62.7 (103.3 to 33.8) |
| United States Virgin Islands | 32 (52.8 to 18.7) | 7 (11.3 to 4.2) | 369.5 (604.7 to 218.9) | 11.2 (18.6 to 6.2) | 2.3 (3.6 to 1.3) | 121 (195.2 to 68.8) | 2.7 (5.7 to 1.3) | 0.5 (1 to 0.2) | 25.2 (53.9 to 12.2) | 6.1 (10.5 to 3.2) | 1.7 (2.8 to 0.9) | 90.7 (150.1 to 48.9) |
| United States of America | 32.5 (34.8 to 30.4) | 3.6 (3.8 to 3.4) | 198.8 (212.3 to 185.3) | 11.1 (12 to 10.4) | 1.2 (1.2 to 1.1) | 63.9 (68.3 to 60) | 5.5 (5.8 to 5.2) | 0.3 (0.3 to 0.3) | 16.9 (18.3 to 15.7) | 3.1 (3.3 to 2.9) | 0.7 (0.8 to 0.7) | 38.7 (41.1 to 36.4) |
| Uruguay | 28.8 (36 to 22.7) | 6.6 (7.9 to 5.5) | 340.9 (407.9 to 280.5) | 20.3 (26.9 to 15) | 4 (5 to 3.1) | 211.8 (269.2 to 163.6) | 1.8 (2.3 to 1.3) | 0.2 (0.3 to 0.2) | 11.9 (15.4 to 9.1) | 4.4 (5.8 to 3.3) | 1.2 (1.6 to 1) | 64.8 (83 to 49.9) |
| Uzbekistan | 12.9 (17 to 9.6) | 4.1 (5.2 to 3.1) | 210.8 (269.3 to 160.7) | 9.7 (13.3 to 6.8) | 2.7 (3.5 to 1.9) | 133.8 (177.7 to 96.2) | 2.1 (2.9 to 1.4) | 0.4 (0.5 to 0.3) | 19.6 (26.2 to 13.9) | 2.5 (3.3 to 1.8) | 0.8 (1.1 to 0.6) | 44.3 (58.2 to 33.2) |
| Vanuatu | 14.4 (21.9 to 8.8) | 7.5 (11.2 to 4.6) | 377 (565.1 to 231) | 16.2 (25.6 to 9.5) | 5.8 (9.1 to 3.5) | 296.5 (459.9 to 179) | 2.3 (4 to 1.1) | 0.6 (1.1 to 0.3) | 30.5 (54.2 to 14.2) | 1.8 (3.8 to 0.8) | 0.4 (0.9 to 0.2) | 22.9 (46.2 to 10.2) |
| Venezuela (Bolivarian Republic of) | 34.5 (48.6 to 23.4) | 6 (8.2 to 4.2) | 315.6 (434.2 to 221.3) | 42.2 (60.2 to 27.6) | 7.4 (10.1 to 5) | 395.7 (539.9 to 267.9) | 2.1 (2.9 to 1.3) | 0.4 (0.5 to 0.2) | 18.7 (26.3 to 12.2) | 4.5 (6.5 to 2.9) | 1.3 (1.8 to 0.9) | 69.1 (97.8 to 46.2) |
| Viet Nam | 14.2 (21.9 to 8.8) | 3.7 (5.5 to 2.4) | 188.4 (285.2 to 120) | 8.9 (14.4 to 5.1) | 2.1 (3.3 to 1.3) | 107.7 (169.5 to 64.6) | 0.9 (1.5 to 0.5) | 0.1 (0.2 to 0.1) | 5.5 (9.2 to 3) | 2.4 (4.2 to 1.3) | 0.5 (0.8 to 0.3) | 25.2 (42.5 to 13.9) |
| Yemen | 8.8 (14.4 to 4.9) | 2.7 (4.4 to 1.6) | 137 (220.4 to 78.2) | 2.7 (4.7 to 1.4) | 1.1 (1.8 to 0.6) | 54.3 (92.5 to 28.4) | 0.6 (1.2 to 0.3) | 0.1 (0.2 to 0.1) | 6.4 (11.1 to 3.3) | 1.1 (2.1 to 0.5) | 0.4 (0.7 to 0.2) | 19.1 (36.3 to 8.4) |
| Zambia | 23.1 (42.9 to 10.4) | 10.9 (20.1 to 5) | 568.3 (1054.5 to 256) | 28.3 (58 to 15) | 11 (21.7 to 6) | 562.6 (1122.1 to 303.7) | 1.2 (3.2 to 0.4) | 0.4 (1 to 0.1) | 18.7 (49.6 to 6.8) | 4 (7.1 to 2) | 1.3 (2.3 to 0.7) | 71.4 (125.6 to 35.5) |
| Zimbabwe | 16.9 (27.2 to 10) | 8.6 (13.8 to 5.2) | 432.1 (689.5 to 260.2) | 35.3 (57.9 to 19.8) | 14.8 (23.7 to 8.4) | 744.9 (1197.7 to 424.2) | 1.8 (3.3 to 0.8) | 0.6 (1.1 to 0.3) | 29.6 (54.5 to 13.7) | 4.4 (7.5 to 2.4) | 1.6 (2.6 to 0.8) | 81.4 (136.4 to 43.2) |

Table S3. Average annual percent change of age-standardized incidence, mortality and DALYs rate from 1990 to 2021

| **locations** | **Female breast cancer** | | | **Cervical cancer** | | | **Uterine cancer** | | | **Ovarian cancer** | | |
| --- | --- | --- | --- | --- | --- | --- | --- | --- | --- | --- | --- | --- |
| **ASIR AAPC and 95%CI** | **ASMR AAPC and 95%CI** | **ASDR AAPC and 95%CI** | **ASIR AAPC and 95%CI** | **ASMR AAPC and 95%CI** | **ASDR AAPC and 95%CI** | **ASIR AAPC and 95%CI** | **ASMR AAPC and 95%CI** | **ASDR AAPC and 95%CI** | **ASIR AAPC and 95%CI** | **ASMR AAPC and 95%CI** | **ASDR AAPC and 95%CI** |
| Global | 0.2 (0.3 to 0.2) | 0.2 (0.3 to 0.2) | 0.3 (0.3 to 0.3) | 0.3 (0.3 to 0.3) | 0.4 (0.3 to 0.4) | 0.4 (0.4 to 0.4) | 0.6 (0.5 to 0.6) | 0 (1.3 to 0) | 0.7 (0.4 to 0.7) | 0.4 (0.4 to 0.4) | 0.4 (0.3 to 0.4) | 0.5 (0.4 to 0.5) |
| High SDI | 0.2 (0.2 to 0.2) | 0.2 (0.1 to 0.2) | 0.2 (0.2 to 0.2) | 0.2 (0.1 to 0.2) | 0.3 (0 to 0.3) | 0.2 (0.2 to 0.2) | 0.2 (0.2 to 0.2) | 0 (0 to 0) | 0.2 (0.2 to 0.2) | 0.2 (0.2 to 0.2) | 0.4 (0 to 0.4) | 0.2 (0.2 to 0.2) |
| High-middle SDI | 0.5 (0.5 to 0.5) | 0.3 (0.4 to 0.3) | 0.4 (0.4 to 0.4) | 0.5 (0.5 to 0.5) | 0.4 (0.3 to 0.4) | 0.5 (0.4 to 0.5) | 0.5 (0.6 to 0.5) | 1.3 (0 to 1.3) | 0.6 (0.6 to 0.6) | 0.5 (0.5 to 0.5) | 0.4 (0.3 to 0.4) | 0.5 (0.5 to 0.5) |
| Middle SDI | 0.3 (0.3 to 0.3) | 0.3 (0.4 to 0.3) | 0.3 (0.3 to 0.3) | 0.4 (0.4 to 0.4) | 0.4 (0.2 to 0.4) | 0.3 (0.3 to 0.3) | 1.1 (0.5 to 1.1) | 0 (1.3 to 0) | 0.9 (0.6 to 0.9) | 0.7 (0.4 to 0.7) | 0.8 (0.3 to 0.8) | 0.6 (0.4 to 0.6) |
| Low-middle SDI | 0.5 (0.4 to 0.5) | 0.5 (0.5 to 0.5) | 0.5 (0.5 to 0.5) | 0.5 (0.5 to 0.5) | 0.5 (0.4 to 0.5) | 0.5 (0.5 to 0.5) | 0.8 (0.6 to 0.8) | 0 (1.3 to 0) | 0.7 (0.7 to 0.7) | 0.7 (0.7 to 0.7) | 0.8 (0.6 to 0.8) | 0.7 (0.6 to 0.7) |
| Low SDI | 0.6 (0.5 to 0.6) | 0.6 (0.5 to 0.6) | 0.6 (0.5 to 0.6) | 0.7 (0.7 to 0.7) | 0.7 (0.7 to 0.7) | 0.7 (0.7 to 0.7) | 0.6 (1.3 to 0.6) | 2.2 (1.3 to 2.2) | 1 (1 to 1) | 1 (0.7 to 1) | 0.9 (0.7 to 0.9) | 1.1 (0.7 to 1.1) |
| Afghanistan | 3.1 (2.4 to 3.1) | 3 (2.4 to 3) | 3 (2.3 to 3) | 2.5 (1.7 to 2.5) | 2.7 (1.7 to 2.7) | 2.6 (1.7 to 2.6) | 2.9 (2.2 to 2.9) | 2.2 (2.2 to 2.2) | 3 (2.2 to 3) | 2.6 (3.1 to 2.6) | 2.7 (3 to 2.7) | 2.6 (3 to 2.6) |
| Albania | 1.2 (1.1 to 1.2) | 1.3 (0.9 to 1.3) | 1.2 (1 to 1.2) | 1.6 (1.5 to 1.6) | 1.6 (1.5 to 1.6) | 1.6 (1.5 to 1.6) | 1.9 (1.6 to 1.9) | 2.2 (1.3 to 2.2) | 1.9 (1.6 to 1.9) | 1.9 (1.4 to 1.9) | 1.6 (1.5 to 1.6) | 1.7 (1.5 to 1.7) |
| Algeria | 1.6 (1.3 to 1.6) | 1.4 (1.3 to 1.4) | 1.4 (1.3 to 1.4) | 1.8 (1.6 to 1.8) | 2 (1.4 to 2) | 1.8 (1.5 to 1.8) | 1.6 (1.9 to 1.6) | Inf (0 to Inf) | 1.8 (1.6 to 1.8) | 1.7 (1.6 to 1.7) | 2.2 (1.3 to 2.2) | 1.7 (1.5 to 1.7) |
| American Samoa | 1.4 (1.2 to 1.4) | 1.3 (1.1 to 1.3) | 1.3 (1.2 to 1.3) | 1.6 (1.5 to 1.6) | 1.5 (1.4 to 1.5) | 1.5 (1.4 to 1.5) | 2.9 (2.4 to 2.9) | 3.2 (2.6 to 3.2) | 2.9 (2.5 to 2.9) | 2.5 (2 to 2.5) | 2.2 (2 to 2.2) | 2.5 (1.9 to 2.5) |
| Andorra | 1.8 (1.4 to 1.8) | 1.7 (1.3 to 1.7) | 1.7 (1.4 to 1.7) | 2.1 (1.7 to 2.1) | 2.2 (1.8 to 2.2) | 2 (1.7 to 2) | 2.1 (1.7 to 2.1) | Inf (2.2 to Inf) | 2.2 (1.6 to 2.2) | 2.2 (1.6 to 2.2) | 1.3 (1.6 to 1.3) | 2 (1.6 to 2) |
| Angola | 1.7 (1.4 to 1.7) | 1.6 (1.4 to 1.6) | 1.7 (1.4 to 1.7) | 1.9 (1.8 to 1.9) | 1.9 (1.6 to 1.9) | 1.9 (1.7 to 1.9) | 2.2 (2 to 2.2) | 2.2 (2.2 to 2.2) | 2.4 (1.9 to 2.4) | 2.8 (1.9 to 2.8) | 2.2 (2 to 2.2) | 2.5 (1.8 to 2.5) |
| Antigua and Barbuda | 0.7 (0.7 to 0.7) | 0.5 (0.5 to 0.5) | 0.5 (0.5 to 0.5) | 0.7 (0.7 to 0.7) | 0.5 (0.6 to 0.5) | 0.5 (0.5 to 0.5) | 0.5 (0.6 to 0.5) | 0.6 (0 to 0.6) | 0.5 (0.5 to 0.5) | 0.7 (0.7 to 0.7) | 0.8 (0.5 to 0.8) | 0.7 (0.6 to 0.7) |
| Argentina | 0.7 (0.7 to 0.7) | 0.6 (0.5 to 0.6) | 0.6 (0.6 to 0.6) | 0.9 (0.9 to 0.9) | 0.8 (0.7 to 0.8) | 0.8 (0.7 to 0.8) | 1.2 (0.9 to 1.2) | 2.2 (0 to 2.2) | 0.9 (0.9 to 0.9) | 0.9 (0.8 to 0.9) | 1 (0.5 to 1) | 0.8 (0.7 to 0.8) |
| Armenia | 0.7 (0.6 to 0.7) | 0.5 (0.5 to 0.5) | 0.6 (0.5 to 0.6) | 0.7 (0.7 to 0.7) | 0.5 (0.5 to 0.5) | 0.5 (0.5 to 0.5) | 0.9 (0.7 to 0.9) | 0.9 (0 to 0.9) | 0.6 (0.6 to 0.6) | 0.8 (0.8 to 0.8) | 0.4 (0.7 to 0.4) | 0.8 (0.6 to 0.8) |
| Australia | 0.8 (0.7 to 0.8) | 0.7 (0.6 to 0.7) | 0.6 (0.6 to 0.6) | 1 (1 to 1) | 0.9 (0.7 to 0.9) | 0.9 (0.8 to 0.9) | 0.9 (0.8 to 0.9) | 0 (2.2 to 0) | 0.9 (0.8 to 0.9) | 0.9 (0.8 to 0.9) | 0.6 (0.9 to 0.6) | 0.8 (0.7 to 0.8) |
| Austria | 0.8 (0.7 to 0.8) | 0.6 (0.5 to 0.6) | 0.6 (0.6 to 0.6) | 1.1 (1 to 1.1) | 0.6 (0.9 to 0.6) | 0.9 (0.8 to 0.9) | 1 (0.9 to 1) | 0 (2.2 to 0) | 1 (0.8 to 1) | 0.9 (0.8 to 0.9) | 0.6 (0.9 to 0.6) | 0.8 (0.7 to 0.8) |
| Azerbaijan | 1.1 (1 to 1.1) | 1 (0.9 to 1) | 1 (0.9 to 1) | 1.1 (1 to 1.1) | 0.8 (0.9 to 0.8) | 1 (0.8 to 1) | 1 (1.8 to 1) | 1.3 (1.6 to 1.3) | 1.1 (1.6 to 1.1) | 1.8 (1.6 to 1.8) | 1.8 (1.5 to 1.8) | 1.7 (1.4 to 1.7) |
| Bahamas | 1.1 (1 to 1.1) | 1 (0.9 to 1) | 1 (1 to 1) | 1.2 (1 to 1.2) | 1.1 (0.9 to 1.1) | 1.1 (1 to 1.1) | 1.1 (1 to 1.1) | 1 (1 to 1) | 1.1 (0.9 to 1.1) | 1.1 (1 to 1.1) | 1.1 (0.9 to 1.1) | 1.1 (1 to 1.1) |
| Bahrain | 1.3 (1.2 to 1.3) | 1.3 (1 to 1.3) | 1.2 (1.1 to 1.2) | 1.6 (1.4 to 1.6) | 1.6 (1.5 to 1.6) | 1.6 (1.4 to 1.6) | 2.1 (1.7 to 2.1) | 2.2 (1.3 to 2.2) | 1.9 (1.7 to 1.9) | 1.7 (1.3 to 1.7) | 1.5 (1.4 to 1.5) | 1.6 (1.3 to 1.6) |
| Bangladesh | 1.6 (1.3 to 1.6) | 1.5 (1.3 to 1.5) | 1.5 (1.3 to 1.5) | 2 (1.7 to 2) | 1.9 (1.6 to 1.9) | 2 (1.7 to 2) | 2.2 (3 to 2.2) | Inf (2.2 to Inf) | 2.8 (2.9 to 2.8) | 2.5 (2 to 2.5) | 2.2 (1.8 to 2.2) | 2.4 (1.9 to 2.4) |
| Barbados | 1.1 (1 to 1.1) | 0.9 (0.9 to 0.9) | 1 (0.9 to 1) | 1.1 (1.1 to 1.1) | 1 (1 to 1) | 1 (1 to 1) | 1.1 (1 to 1.1) | 1.3 (0.9 to 1.3) | 1 (0.9 to 1) | 1 (1.1 to 1) | 1 (0.9 to 1) | 1 (0.9 to 1) |
| Belarus | 1.2 (1.1 to 1.2) | 1.1 (1 to 1.1) | 1.2 (1 to 1.2) | 1.4 (1.1 to 1.4) | 1.2 (1.1 to 1.2) | 1.2 (1.1 to 1.2) | 1.2 (1.2 to 1.2) | 0.9 (0.7 to 0.9) | 1.2 (1.1 to 1.2) | 1.2 (1 to 1.2) | 1.3 (1.1 to 1.3) | 1.1 (1 to 1.1) |
| Belgium | 0.8 (0.7 to 0.8) | 0.6 (0.5 to 0.6) | 0.7 (0.6 to 0.7) | 1.1 (1 to 1.1) | 0.9 (0.7 to 0.9) | 0.9 (0.8 to 0.9) | 0.8 (1 to 0.8) | 2.2 (0 to 2.2) | 0.9 (0.8 to 0.9) | 0.9 (0.9 to 0.9) | 0.5 (0.8 to 0.5) | 0.8 (0.8 to 0.8) |
| Belize | 0.8 (0.8 to 0.8) | 0.7 (0.7 to 0.7) | 0.7 (0.7 to 0.7) | 0.8 (0.8 to 0.8) | 0.7 (0.6 to 0.7) | 0.7 (0.6 to 0.7) | 0.7 (0.7 to 0.7) | 0.9 (0.4 to 0.9) | 0.7 (0.6 to 0.7) | 0.8 (0.9 to 0.8) | 1.1 (0.8 to 1.1) | 0.7 (0.7 to 0.7) |
| Benin | 1.9 (1.6 to 1.9) | 1.7 (1.6 to 1.7) | 1.8 (1.6 to 1.8) | 1.9 (1.7 to 1.9) | 1.8 (1.6 to 1.8) | 1.8 (1.6 to 1.8) | 3 (1.5 to 3) | 0 (2.2 to 0) | 2 (1.7 to 2) | 2 (1.6 to 2) | 2.2 (1.3 to 2.2) | 2 (1.6 to 2) |
| Bermuda | 1.1 (0.9 to 1.1) | 0.9 (0.8 to 0.9) | 0.9 (0.8 to 0.9) | 1.3 (1.2 to 1.3) | 1 (1 to 1) | 1.1 (1.1 to 1.1) | 1.1 (1.1 to 1.1) | 0.9 (1.3 to 0.9) | 1.1 (1 to 1.1) | 1 (0.9 to 1) | 0.8 (0.8 to 0.8) | 0.9 (0.8 to 0.9) |
| Bhutan | 1.9 (1.6 to 1.9) | 1.8 (1.5 to 1.8) | 1.8 (1.6 to 1.8) | 2 (1.8 to 2) | 1.8 (1.6 to 1.8) | 1.9 (1.7 to 1.9) | 3 (2.5 to 3) | Inf (2.2 to Inf) | 2.6 (2.8 to 2.6) | 2.4 (2.1 to 2.4) | 2.2 (2 to 2.2) | 2.3 (2.1 to 2.3) |
| Bolivia (Plurinational State of) | 1.7 (1.5 to 1.7) | 1.7 (1.4 to 1.7) | 1.6 (1.4 to 1.6) | 1.8 (1.6 to 1.8) | 1.6 (1.5 to 1.6) | 1.7 (1.6 to 1.7) | 2.1 (1.7 to 2.1) | 1.6 (1.9 to 1.6) | 2 (1.7 to 2) | 2 (1.8 to 2) | 2 (1.8 to 2) | 1.9 (1.7 to 1.9) |
| Bosnia and Herzegovina | 1.4 (1.1 to 1.4) | 1.2 (1.1 to 1.2) | 1.3 (1.1 to 1.3) | 1.5 (1.2 to 1.5) | 1.5 (1.2 to 1.5) | 1.4 (1.1 to 1.4) | 1.5 (1.3 to 1.5) | 2.2 (1.3 to 2.2) | 1.6 (1.1 to 1.6) | 1.5 (1.2 to 1.5) | 1.6 (1.1 to 1.6) | 1.6 (1.1 to 1.6) |
| Botswana | 2.2 (1.8 to 2.2) | 2.1 (1.7 to 2.1) | 2.1 (1.8 to 2.1) | 2 (1.9 to 2) | 1.9 (1.9 to 1.9) | 1.9 (1.9 to 1.9) | 2.7 (2.2 to 2.7) | 2.2 (2.2 to 2.2) | 2.6 (2.4 to 2.6) | 3 (1.9 to 3) | 2.6 (1.9 to 2.6) | 2.9 (1.9 to 2.9) |
| Brazil | 0.3 (0.3 to 0.3) | 0.2 (0.2 to 0.2) | 0.2 (0.2 to 0.2) | 0.3 (0.3 to 0.3) | 0.3 (0.2 to 0.3) | 0.3 (0.3 to 0.3) | 0.3 (0.5 to 0.3) | 0 (1.3 to 0) | 0.3 (0.3 to 0.3) | 0.3 (0.3 to 0.3) | 0.3 (0.3 to 0.3) | 0.3 (0.3 to 0.3) |
| Brunei Darussalam | 1.2 (1.1 to 1.2) | 1.2 (0.9 to 1.2) | 1.2 (1 to 1.2) | 1.5 (1.3 to 1.5) | 1.3 (1.3 to 1.3) | 1.4 (1.2 to 1.4) | 1.6 (1.5 to 1.6) | 2.2 (1.3 to 2.2) | 1.6 (1.4 to 1.6) | 1.5 (1.3 to 1.5) | 1.3 (1.2 to 1.3) | 1.4 (1.3 to 1.4) |
| Bulgaria | 0.9 (0.9 to 0.9) | 0.8 (0.7 to 0.8) | 0.8 (0.7 to 0.8) | 1.1 (1 to 1.1) | 0.9 (0.8 to 0.9) | 0.9 (0.9 to 0.9) | 1 (0.9 to 1) | 0.9 (1 to 0.9) | 0.9 (0.8 to 0.9) | 1 (0.9 to 1) | 1 (0.9 to 1) | 0.9 (0.9 to 0.9) |
| Burkina Faso | 1.8 (1.5 to 1.8) | 1.7 (1.5 to 1.7) | 1.8 (1.5 to 1.8) | 1.9 (1.6 to 1.9) | 1.8 (1.6 to 1.8) | 1.9 (1.6 to 1.9) | 2.2 (2.2 to 2.2) | 0 (2.2 to 0) | 2.1 (1.8 to 2.1) | 2 (1.8 to 2) | 2.2 (1.3 to 2.2) | 2 (1.7 to 2) |
| Burundi | 1.7 (1.6 to 1.7) | 1.6 (1.5 to 1.6) | 1.7 (1.6 to 1.7) | 1.8 (1.6 to 1.8) | 1.8 (1.6 to 1.8) | 1.8 (1.6 to 1.8) | 2.2 (2 to 2.2) | 2.2 (2.2 to 2.2) | 2.2 (2 to 2.2) | 2.2 (1.7 to 2.2) | 2.2 (1.5 to 2.2) | 2.2 (1.7 to 2.2) |
| Cabo Verde | 1.5 (1.4 to 1.5) | 1.4 (1.4 to 1.4) | 1.5 (1.3 to 1.5) | 1.8 (1.5 to 1.8) | 1.7 (1.5 to 1.7) | 1.7 (1.5 to 1.7) | 2.7 (2.5 to 2.7) | 0 (3.5 to 0) | 2.3 (2.5 to 2.3) | 2.7 (1.9 to 2.7) | 2.2 (1.8 to 2.2) | 2.8 (1.7 to 2.8) |
| Cambodia | 1.6 (1.4 to 1.6) | 1.5 (1.3 to 1.5) | 1.5 (1.3 to 1.5) | 1.8 (1.7 to 1.8) | 1.6 (1.6 to 1.6) | 1.7 (1.7 to 1.7) | 2.1 (1.9 to 2.1) | 3 (1.5 to 3) | 2.2 (1.9 to 2.2) | 2.3 (2 to 2.3) | 2.1 (1.8 to 2.1) | 2.2 (1.9 to 2.2) |
| Cameroon | 1.8 (1.5 to 1.8) | 1.8 (1.4 to 1.8) | 1.8 (1.5 to 1.8) | 2.1 (1.7 to 2.1) | 2.1 (1.6 to 2.1) | 2.1 (1.6 to 2.1) | 2.2 (1.6 to 2.2) | 2.2 (1.3 to 2.2) | 2.2 (1.7 to 2.2) | 2 (1.8 to 2) | 3 (1.5 to 3) | 2.1 (1.7 to 2.1) |
| Canada | 0.8 (0.8 to 0.8) | 0.5 (0.6 to 0.5) | 0.6 (0.6 to 0.6) | 1.1 (1 to 1.1) | 1.2 (0.8 to 1.2) | 0.9 (0.8 to 0.9) | 0.9 (1 to 0.9) | 2.2 (0 to 2.2) | 0.9 (0.9 to 0.9) | 0.9 (0.9 to 0.9) | 0.5 (0.8 to 0.5) | 0.8 (0.7 to 0.8) |
| Central African Republic | 1.9 (1.5 to 1.9) | 2 (1.5 to 2) | 1.9 (1.5 to 1.9) | 2 (1.6 to 2) | 2 (1.7 to 2) | 2 (1.7 to 2) | 1.6 (2.2 to 1.6) | 2.2 (2.2 to 2.2) | 2.3 (1.9 to 2.3) | 2.2 (1.9 to 2.2) | 1.6 (2.2 to 1.6) | 2.1 (1.8 to 2.1) |
| Chad | 1.8 (1.5 to 1.8) | 1.7 (1.5 to 1.7) | 1.7 (1.5 to 1.7) | 1.9 (1.7 to 1.9) | 1.8 (1.6 to 1.8) | 1.8 (1.6 to 1.8) | 2.2 (1.8 to 2.2) | 0 (3.5 to 0) | 2.1 (1.8 to 2.1) | 2.2 (1.8 to 2.2) | 3.5 (1.6 to 3.5) | 2.3 (1.8 to 2.3) |
| Chile | 0.8 (0.7 to 0.8) | 0.7 (0.5 to 0.7) | 0.7 (0.6 to 0.7) | 1 (0.9 to 1) | 0.8 (0.7 to 0.8) | 0.8 (0.7 to 0.8) | 1 (1 to 1) | 0 (0 to 0) | 0.9 (0.8 to 0.9) | 0.9 (0.9 to 0.9) | 0.8 (0.6 to 0.8) | 0.8 (0.7 to 0.8) |
| China | 1 (0.9 to 1) | 1 (0.9 to 1) | 1 (0.9 to 1) | 1.1 (0.9 to 1.1) | 1.2 (0.9 to 1.2) | 1.1 (0.9 to 1.1) | 1.3 (1.1 to 1.3) | 1.3 (0.9 to 1.3) | 1.3 (1.1 to 1.3) | 1.2 (1 to 1.2) | 1.3 (0.9 to 1.3) | 1.1 (1 to 1.1) |
| Colombia | 1 (0.9 to 1) | 0.9 (0.8 to 0.9) | 0.9 (0.8 to 0.9) | 1.2 (1 to 1.2) | 1 (0.9 to 1) | 1 (0.9 to 1) | 1.1 (1 to 1.1) | 2.2 (1.3 to 2.2) | 1 (1 to 1) | 1.1 (0.9 to 1.1) | 0.8 (0.9 to 0.8) | 1 (0.9 to 1) |
| Comoros | 1.5 (1.4 to 1.5) | 1.5 (1.4 to 1.5) | 1.5 (1.4 to 1.5) | 1.9 (1.6 to 1.9) | 1.9 (1.6 to 1.9) | 1.9 (1.6 to 1.9) | 2.2 (1.7 to 2.2) | 1.3 (1.6 to 1.3) | 2 (1.8 to 2) | 2.7 (1.9 to 2.7) | 3 (1.6 to 3) | 2.6 (1.7 to 2.6) |
| Congo | 2.2 (1.8 to 2.2) | 2.2 (1.8 to 2.2) | 2.1 (1.8 to 2.1) | 2.2 (1.8 to 2.2) | 2.2 (1.7 to 2.2) | 2.2 (1.7 to 2.2) | 2 (2.1 to 2) | 1.3 (2.2 to 1.3) | 2.2 (1.9 to 2.2) | 2 (1.8 to 2) | 1.9 (1.6 to 1.9) | 2 (1.7 to 2) |
| Cook Islands | 1.5 (1.3 to 1.5) | 1.4 (1.3 to 1.4) | 1.5 (1.3 to 1.5) | 1.8 (1.6 to 1.8) | 1.5 (1.6 to 1.5) | 1.7 (1.6 to 1.7) | 2.1 (1.7 to 2.1) | 2.2 (1.3 to 2.2) | 1.8 (1.7 to 1.8) | 1.9 (1.8 to 1.9) | 1.3 (2.2 to 1.3) | 1.9 (1.6 to 1.9) |
| Costa Rica | 0.9 (0.9 to 0.9) | 0.8 (0.7 to 0.8) | 0.8 (0.7 to 0.8) | 1.1 (1 to 1.1) | 1 (0.8 to 1) | 1 (0.8 to 1) | 1.1 (1 to 1.1) | 1.3 (0.9 to 1.3) | 1 (0.9 to 1) | 1 (0.9 to 1) | 1 (0.8 to 1) | 1 (0.9 to 1) |
| Croatia | 0.9 (0.8 to 0.9) | 0.8 (0.6 to 0.8) | 0.8 (0.6 to 0.8) | 1.1 (1 to 1.1) | 0.7 (0.8 to 0.7) | 1 (0.8 to 1) | 1.1 (0.9 to 1.1) | 1.3 (0 to 1.3) | 1 (0.9 to 1) | 1 (0.8 to 1) | 0.9 (0.7 to 0.9) | 0.9 (0.8 to 0.9) |
| Cuba | 1 (0.9 to 1) | 0.9 (0.8 to 0.9) | 0.8 (0.8 to 0.8) | 1.2 (1 to 1.2) | 0.9 (1 to 0.9) | 1 (1 to 1) | 1.1 (1 to 1.1) | 0.9 (1 to 0.9) | 1 (0.9 to 1) | 1.1 (1 to 1.1) | 1.2 (0.8 to 1.2) | 1 (0.9 to 1) |
| Cyprus | 1.2 (1.1 to 1.2) | 1.1 (1 to 1.1) | 1.1 (1 to 1.1) | 1.6 (1.4 to 1.6) | 2.2 (0.9 to 2.2) | 1.5 (1.3 to 1.5) | 1.6 (2 to 1.6) | 0 (2.2 to 0) | 1.8 (1.9 to 1.8) | 1.7 (1.5 to 1.7) | 1.3 (1.6 to 1.3) | 1.8 (1.4 to 1.8) |
| Czechia | 0.9 (0.8 to 0.9) | 0.7 (0.6 to 0.7) | 0.7 (0.6 to 0.7) | 1.1 (1 to 1.1) | 0.7 (1.1 to 0.7) | 0.9 (0.9 to 0.9) | 0.9 (0.9 to 0.9) | 0 (0.9 to 0) | 0.9 (0.8 to 0.9) | 1 (0.9 to 1) | 0.7 (0.8 to 0.7) | 0.9 (0.8 to 0.9) |
| Côte d'Ivoire | 1.6 (1.5 to 1.6) | 1.6 (1.4 to 1.6) | 1.6 (1.4 to 1.6) | 1.9 (1.6 to 1.9) | 2 (1.6 to 2) | 2 (1.6 to 2) | 3 (1.5 to 3) | 0 (2.2 to 0) | 2.1 (1.8 to 2.1) | 2.1 (1.7 to 2.1) | 1.8 (1.5 to 1.8) | 2 (1.7 to 2) |
| Democratic People's Republic of Korea | 1.8 (1.6 to 1.8) | 1.8 (1.4 to 1.8) | 1.8 (1.4 to 1.8) | 2 (1.7 to 2) | 1.9 (1.6 to 1.9) | 1.9 (1.6 to 1.9) | 2.3 (1.8 to 2.3) | 3 (1.9 to 3) | 2.2 (1.9 to 2.2) | 2 (1.7 to 2) | 1.9 (1.6 to 1.9) | 1.9 (1.7 to 1.9) |
| Democratic Republic of the Congo | 1.6 (1.5 to 1.6) | 1.5 (1.5 to 1.5) | 1.6 (1.5 to 1.6) | 2.1 (1.6 to 2.1) | 1.9 (1.6 to 1.9) | 2 (1.6 to 2) | 2.2 (2 to 2.2) | 2.2 (1.3 to 2.2) | 2.5 (2 to 2.5) | 2.2 (1.8 to 2.2) | 2.2 (1.6 to 2.2) | 2.2 (1.7 to 2.2) |
| Denmark | 0.8 (0.8 to 0.8) | 0.6 (0.6 to 0.6) | 0.6 (0.6 to 0.6) | 1 (0.9 to 1) | 0.4 (1 to 0.4) | 0.9 (0.8 to 0.9) | 1 (1 to 1) | 0 (2.2 to 0) | 0.9 (0.9 to 0.9) | 0.9 (0.8 to 0.9) | 1.3 (0.5 to 1.3) | 0.8 (0.8 to 0.8) |
| Djibouti | 2 (1.7 to 2) | 1.9 (1.6 to 1.9) | 1.9 (1.7 to 1.9) | 2.1 (1.8 to 2.1) | 2.2 (1.8 to 2.2) | 2.2 (1.9 to 2.2) | 2.2 (2.4 to 2.2) | 2.2 (3 to 2.2) | 2.6 (2.4 to 2.6) | 2.8 (2 to 2.8) | 2.5 (1.9 to 2.5) | 2.8 (2 to 2.8) |
| Dominica | 1.4 (1.2 to 1.4) | 1.3 (1.1 to 1.3) | 1.3 (1.1 to 1.3) | 1.6 (1.4 to 1.6) | 1.5 (1.3 to 1.5) | 1.5 (1.3 to 1.5) | 1.9 (1.7 to 1.9) | 1.3 (1.6 to 1.3) | 1.7 (1.5 to 1.7) | 1.8 (1.5 to 1.8) | 1.5 (1.3 to 1.5) | 1.6 (1.5 to 1.6) |
| Dominican Republic | 1.5 (1.3 to 1.5) | 1.5 (1.2 to 1.5) | 1.4 (1.2 to 1.4) | 1.7 (1.4 to 1.7) | 1.6 (1.3 to 1.6) | 1.6 (1.3 to 1.6) | 2 (1.5 to 2) | 1.5 (1.6 to 1.5) | 1.9 (1.5 to 1.9) | 1.5 (1.6 to 1.5) | 1.8 (1.2 to 1.8) | 1.6 (1.5 to 1.6) |
| Ecuador | 1.3 (1.1 to 1.3) | 1.2 (1 to 1.2) | 1.2 (1 to 1.2) | 1.3 (1.2 to 1.3) | 1.2 (1.1 to 1.2) | 1.3 (1.1 to 1.3) | 1.4 (1.3 to 1.4) | 0.9 (1.3 to 0.9) | 1.3 (1.2 to 1.3) | 1.3 (1.1 to 1.3) | 1.2 (1.1 to 1.2) | 1.2 (1.1 to 1.2) |
| Egypt | 1.3 (1.1 to 1.3) | 1.2 (1 to 1.2) | 1.2 (1.1 to 1.2) | 1.9 (1.4 to 1.9) | 1.6 (1.5 to 1.6) | 1.6 (1.4 to 1.6) | 1.6 (1.7 to 1.6) | 0 (2.2 to 0) | 1.9 (1.6 to 1.9) | 1.6 (1.3 to 1.6) | 1.6 (1.5 to 1.6) | 1.5 (1.2 to 1.5) |
| El Salvador | 1.3 (1.2 to 1.3) | 1.1 (1.2 to 1.1) | 1.1 (1.2 to 1.1) | 1.3 (1.2 to 1.3) | 1.2 (1.1 to 1.2) | 1.3 (1 to 1.3) | 1.4 (1.2 to 1.4) | 1.3 (0.9 to 1.3) | 1.3 (1.1 to 1.3) | 1.5 (1.3 to 1.5) | 1.3 (1.1 to 1.3) | 1.5 (1.2 to 1.5) |
| Equatorial Guinea | 2.2 (1.9 to 2.2) | 2.1 (1.9 to 2.1) | 2.2 (1.9 to 2.2) | 2.5 (2 to 2.5) | 2.4 (1.9 to 2.4) | 2.4 (2 to 2.4) | 3 (1.9 to 3) | 2.2 (2.2 to 2.2) | 2.6 (2 to 2.6) | 2.5 (2.1 to 2.5) | 2.2 (2.2 to 2.2) | 2.6 (2.1 to 2.6) |
| Eritrea | 1.9 (1.6 to 1.9) | 1.9 (1.5 to 1.9) | 1.9 (1.5 to 1.9) | 2 (1.7 to 2) | 1.9 (1.6 to 1.9) | 1.9 (1.6 to 1.9) | 1.9 (2.1 to 1.9) | 1.3 (2.2 to 1.3) | 2.3 (2 to 2.3) | 2.1 (1.9 to 2.1) | 2.2 (1.8 to 2.2) | 2.1 (1.8 to 2.1) |
| Estonia | 0.9 (0.9 to 0.9) | 0.8 (0.8 to 0.8) | 0.9 (0.8 to 0.9) | 1.1 (1 to 1.1) | 1 (0.8 to 1) | 1 (0.9 to 1) | 1.1 (0.9 to 1.1) | 1.3 (0 to 1.3) | 1.1 (0.8 to 1.1) | 1 (1 to 1) | 0.7 (0.8 to 0.7) | 1 (0.8 to 1) |
| Eswatini | 2.4 (1.9 to 2.4) | 2.4 (1.9 to 2.4) | 2.4 (1.9 to 2.4) | 2.6 (2 to 2.6) | 2.6 (2 to 2.6) | 2.6 (2 to 2.6) | 2.6 (2.2 to 2.6) | 3.5 (1.6 to 3.5) | 2.8 (2 to 2.8) | 2.7 (2.1 to 2.7) | 2.8 (2.1 to 2.8) | 2.7 (2.2 to 2.7) |
| Ethiopia | 1 (1 to 1) | 1 (0.9 to 1) | 1 (0.9 to 1) | 1.4 (1.5 to 1.4) | 1.2 (1.4 to 1.2) | 1.3 (1.4 to 1.3) | 1.6 (1.9 to 1.6) | 0 (3.5 to 0) | 1.8 (2.1 to 1.8) | 2.2 (1.4 to 2.2) | 2.2 (1.3 to 2.2) | 2.3 (1.4 to 2.3) |
| Fiji | 1.5 (1.4 to 1.5) | 1.4 (1.3 to 1.4) | 1.5 (1.3 to 1.5) | 1.8 (1.5 to 1.8) | 1.8 (1.4 to 1.8) | 1.8 (1.4 to 1.8) | 1.9 (1.7 to 1.9) | 1.8 (1.5 to 1.8) | 1.9 (1.8 to 1.9) | 2 (1.6 to 2) | 1.6 (1.9 to 1.6) | 1.8 (1.6 to 1.8) |
| Finland | 0.8 (0.7 to 0.8) | 0.7 (0.5 to 0.7) | 0.7 (0.6 to 0.7) | 1.2 (1 to 1.2) | 0.7 (1.1 to 0.7) | 1 (0.9 to 1) | 1.1 (0.9 to 1.1) | 2.2 (0 to 2.2) | 1 (0.9 to 1) | 1 (0.9 to 1) | 1.1 (0.8 to 1.1) | 0.8 (0.8 to 0.8) |
| France | 0.8 (0.7 to 0.8) | 0.5 (0.6 to 0.5) | 0.6 (0.6 to 0.6) | 1 (0.9 to 1) | 0.9 (0.7 to 0.9) | 0.9 (0.8 to 0.9) | 1.1 (0.8 to 1.1) | 2.2 (0 to 2.2) | 1 (0.9 to 1) | 0.9 (0.9 to 0.9) | 0.6 (0.5 to 0.6) | 0.8 (0.8 to 0.8) |
| Gabon | 1.8 (1.6 to 1.8) | 1.8 (1.5 to 1.8) | 1.8 (1.5 to 1.8) | 2.1 (1.8 to 2.1) | 2 (1.7 to 2) | 1.9 (1.8 to 1.9) | 2.2 (1.7 to 2.2) | 2.2 (2.2 to 2.2) | 2.3 (1.8 to 2.3) | 2.2 (1.8 to 2.2) | 2.6 (1.6 to 2.6) | 2.2 (1.8 to 2.2) |
| Gambia | 1.7 (1.6 to 1.7) | 1.6 (1.5 to 1.6) | 1.7 (1.5 to 1.7) | 2.1 (1.7 to 2.1) | 2 (1.6 to 2) | 2 (1.7 to 2) | 2.2 (2 to 2.2) | 2.2 (1.3 to 2.2) | 2.1 (1.8 to 2.1) | 2.8 (1.6 to 2.8) | 2.2 (1.3 to 2.2) | 2.3 (1.7 to 2.3) |
| Georgia | 0.7 (0.7 to 0.7) | 0.5 (0.5 to 0.5) | 0.6 (0.5 to 0.6) | 0.7 (0.7 to 0.7) | 0.6 (0.5 to 0.6) | 0.5 (0.5 to 0.5) | 0.7 (0.6 to 0.7) | 0.5 (0.4 to 0.5) | 0.5 (0.4 to 0.5) | 0.7 (0.7 to 0.7) | 0.8 (0.5 to 0.8) | 0.7 (0.6 to 0.7) |
| Germany | 0.7 (0.7 to 0.7) | 0.6 (0.5 to 0.6) | 0.5 (0.5 to 0.5) | 1 (0.9 to 1) | 0.8 (0.9 to 0.8) | 0.9 (0.8 to 0.9) | 0.9 (0.9 to 0.9) | 0 (2.2 to 0) | 0.9 (0.8 to 0.9) | 0.8 (0.8 to 0.8) | 0.5 (0.8 to 0.5) | 0.7 (0.7 to 0.7) |
| Ghana | 1.7 (1.4 to 1.7) | 1.6 (1.4 to 1.6) | 1.6 (1.4 to 1.6) | 1.9 (1.6 to 1.9) | 1.9 (1.5 to 1.9) | 1.9 (1.5 to 1.9) | 2.2 (1.8 to 2.2) | 2.2 (2.2 to 2.2) | 2.2 (2 to 2.2) | 2.2 (1.6 to 2.2) | 2.2 (1.3 to 2.2) | 2.2 (1.7 to 2.2) |
| Greece | 0.7 (0.6 to 0.7) | 0.4 (0.4 to 0.4) | 0.5 (0.5 to 0.5) | 0.7 (0.7 to 0.7) | 0.4 (0.7 to 0.4) | 0.5 (0.5 to 0.5) | 0.6 (0.5 to 0.6) | 0 (0 to 0) | 0.5 (0.5 to 0.5) | 0.6 (0.6 to 0.6) | 0.4 (0.6 to 0.4) | 0.5 (0.5 to 0.5) |
| Greenland | 1.7 (1.4 to 1.7) | 1.7 (1.4 to 1.7) | 1.7 (1.4 to 1.7) | 2 (1.6 to 2) | 1.7 (1.6 to 1.7) | 1.8 (1.5 to 1.8) | 2.2 (2.2 to 2.2) | 0 (2.2 to 0) | 2 (1.9 to 2) | 2.1 (1.6 to 2.1) | 2.1 (1.6 to 2.1) | 2.1 (1.5 to 2.1) |
| Grenada | 1 (0.9 to 1) | 0.9 (0.8 to 0.9) | 1 (0.8 to 1) | 1.2 (1.1 to 1.2) | 1 (1 to 1) | 1.1 (1 to 1.1) | 1.4 (1.1 to 1.4) | 1.5 (1 to 1.5) | 1.3 (1.1 to 1.3) | 0.9 (0.9 to 0.9) | 0.9 (0.7 to 0.9) | 0.8 (0.8 to 0.8) |
| Guam | 1 (0.9 to 1) | 1 (0.9 to 1) | 0.9 (0.9 to 0.9) | 1.2 (1.1 to 1.2) | 0.9 (0.8 to 0.9) | 1 (0.9 to 1) | 1.4 (1 to 1.4) | 0.9 (1.3 to 0.9) | 1.2 (1 to 1.2) | 1.3 (1.1 to 1.3) | 1 (1 to 1) | 1.2 (1 to 1.2) |
| Guatemala | 0.9 (0.8 to 0.9) | 0.9 (0.7 to 0.9) | 0.8 (0.7 to 0.8) | 0.9 (0.8 to 0.9) | 0.7 (0.7 to 0.7) | 0.8 (0.7 to 0.8) | 0.8 (0.6 to 0.8) | 0.9 (0.7 to 0.9) | 0.7 (0.6 to 0.7) | 0.9 (0.8 to 0.9) | 1.1 (0.4 to 1.1) | 0.7 (0.7 to 0.7) |
| Guinea | 1.7 (1.6 to 1.7) | 1.7 (1.6 to 1.7) | 1.8 (1.6 to 1.8) | 1.9 (1.6 to 1.9) | 1.9 (1.6 to 1.9) | 1.9 (1.6 to 1.9) | 2.2 (2 to 2.2) | 2.2 (2.2 to 2.2) | 2.3 (2 to 2.3) | 2.2 (1.8 to 2.2) | 2.2 (1.8 to 2.2) | 2.5 (1.7 to 2.5) |
| Guinea-Bissau | 1.8 (1.5 to 1.8) | 1.7 (1.5 to 1.7) | 1.8 (1.5 to 1.8) | 1.9 (1.6 to 1.9) | 1.9 (1.5 to 1.9) | 1.9 (1.5 to 1.9) | 2.7 (1.5 to 2.7) | 2.2 (2.2 to 2.2) | 2.2 (1.7 to 2.2) | 2 (1.8 to 2) | 1.6 (1.9 to 1.6) | 2 (1.6 to 2) |
| Guyana | 1.4 (1.2 to 1.4) | 1.4 (1.2 to 1.4) | 1.3 (1.2 to 1.3) | 1.6 (1.4 to 1.6) | 1.5 (1.3 to 1.5) | 1.5 (1.3 to 1.5) | 1.4 (1.3 to 1.4) | 1.5 (1.4 to 1.5) | 1.5 (1.3 to 1.5) | 1.4 (1.2 to 1.4) | 1.2 (1.2 to 1.2) | 1.3 (1.2 to 1.3) |
| Haiti | 1.9 (1.7 to 1.9) | 2 (1.6 to 2) | 2 (1.7 to 2) | 1.9 (1.5 to 1.9) | 1.8 (1.5 to 1.8) | 1.8 (1.5 to 1.8) | 2.5 (2 to 2.5) | 2.2 (1.9 to 2.2) | 2.4 (2 to 2.4) | 2.1 (2.5 to 2.1) | 2 (2.4 to 2) | 2 (2.4 to 2) |
| Honduras | 1.9 (1.6 to 1.9) | 1.8 (1.5 to 1.8) | 1.8 (1.6 to 1.8) | 2.3 (1.7 to 2.3) | 2.2 (1.6 to 2.2) | 2.3 (1.6 to 2.3) | 2.2 (1.9 to 2.2) | 2.2 (2 to 2.2) | 2.2 (1.9 to 2.2) | 2.8 (2.2 to 2.8) | 2.8 (2 to 2.8) | 2.7 (2.1 to 2.7) |
| Hungary | 0.9 (0.8 to 0.9) | 0.7 (0.6 to 0.7) | 0.7 (0.6 to 0.7) | 1.1 (1.1 to 1.1) | 0.9 (0.9 to 0.9) | 1 (0.9 to 1) | 1 (0.9 to 1) | 0 (0.9 to 0) | 0.8 (0.8 to 0.8) | 0.9 (0.8 to 0.9) | 0.9 (0.7 to 0.9) | 0.8 (0.8 to 0.8) |
| Iceland | 0.9 (0.8 to 0.9) | 0.7 (0.6 to 0.7) | 0.7 (0.6 to 0.7) | 1.2 (1 to 1.2) | 0.6 (0.9 to 0.6) | 1 (0.9 to 1) | 1.1 (0.9 to 1.1) | 0 (2.2 to 0) | 1 (0.9 to 1) | 0.9 (0.9 to 0.9) | 0.9 (0.7 to 0.9) | 0.9 (0.8 to 0.9) |
| India | 0.6 (0.6 to 0.6) | 0.6 (0.6 to 0.6) | 0.6 (0.6 to 0.6) | 0.6 (0.6 to 0.6) | 0.6 (0.6 to 0.6) | 0.7 (0.7 to 0.7) | 0.7 (0.6 to 0.7) | 0 (0 to 0) | 0.9 (1 to 0.9) | 0.9 (0.7 to 0.9) | 0.9 (0.7 to 0.9) | 0.8 (0.7 to 0.8) |
| Indonesia | 1.3 (1.1 to 1.3) | 1.3 (1.2 to 1.3) | 1.2 (1.2 to 1.2) | 1.1 (1.1 to 1.1) | 1.1 (1 to 1.1) | 1.1 (1 to 1.1) | 2.2 (1.3 to 2.2) | 2.2 (1.8 to 2.2) | 2.2 (1.3 to 2.2) | 1.6 (1.6 to 1.6) | 1.6 (1.5 to 1.6) | 1.6 (1.6 to 1.6) |
| Iran (Islamic Republic of) | 0.7 (0.6 to 0.7) | 0.4 (0.5 to 0.4) | 0.4 (0.4 to 0.4) | 0.8 (0.8 to 0.8) | 0.9 (0 to 0.9) | 0.6 (0.6 to 0.6) | 2.8 (1.1 to 2.8) | Inf (0 to Inf) | 2.9 (1 to 2.9) | 2.2 (0.9 to 2.2) | 2.2 (0.5 to 2.2) | 2 (0.7 to 2) |
| Iraq | 1.5 (1.4 to 1.5) | 1.5 (1.3 to 1.5) | 1.5 (1.3 to 1.5) | 1.9 (1.6 to 1.9) | 2.2 (1.3 to 2.2) | 1.7 (1.6 to 1.7) | 2.2 (1.7 to 2.2) | 2.2 (1.3 to 2.2) | 2 (1.6 to 2) | 1.8 (1.7 to 1.8) | 1.5 (1.8 to 1.5) | 1.7 (1.6 to 1.7) |
| Ireland | 0.8 (0.7 to 0.8) | 0.6 (0.6 to 0.6) | 0.6 (0.6 to 0.6) | 1.1 (1 to 1.1) | 0.9 (0.7 to 0.9) | 0.9 (0.9 to 0.9) | 1 (1 to 1) | 0 (2.2 to 0) | 1 (0.9 to 1) | 1 (0.8 to 1) | 0.9 (0.7 to 0.9) | 0.9 (0.8 to 0.9) |
| Israel | 0.7 (0.7 to 0.7) | 0.5 (0.5 to 0.5) | 0.5 (0.5 to 0.5) | 1 (1 to 1) | 0.7 (0.6 to 0.7) | 0.9 (0.9 to 0.9) | 1 (0.9 to 1) | 0 (0 to 0) | 1 (0.8 to 1) | 0.9 (0.8 to 0.9) | 0.7 (1.1 to 0.7) | 0.8 (0.8 to 0.8) |
| Italy | 0.5 (0.4 to 0.5) | 0.2 (0.2 to 0.2) | 0.3 (0.2 to 0.3) | 0.6 (0.6 to 0.6) | 0 (0.5 to 0) | 0.3 (0.3 to 0.3) | 0.4 (0.4 to 0.4) | 0 (0 to 0) | 0.4 (0.4 to 0.4) | 0.6 (0.5 to 0.6) | 0.4 (0.4 to 0.4) | 0.3 (0.3 to 0.3) |
| Jamaica | 1.3 (1.2 to 1.3) | 1.2 (1.1 to 1.2) | 1.2 (1.1 to 1.2) | 1.5 (1.3 to 1.5) | 1.4 (1.2 to 1.4) | 1.4 (1.2 to 1.4) | 1.5 (1.3 to 1.5) | 1.5 (1.6 to 1.5) | 1.4 (1.3 to 1.4) | 1.4 (1.3 to 1.4) | 1.4 (1.2 to 1.4) | 1.4 (1.2 to 1.4) |
| Japan | 0.5 (0.4 to 0.5) | 0.1 (0.1 to 0.1) | 0.2 (0.2 to 0.2) | 0.6 (0.5 to 0.6) | 0 (0.3 to 0) | 0.2 (0.2 to 0.2) | 0.4 (0.5 to 0.4) | 0 (0 to 0) | 0.2 (0.2 to 0.2) | 0.5 (0.4 to 0.5) | 0 (0.3 to 0) | 0.1 (0.1 to 0.1) |
| Jordan | 1.6 (1.4 to 1.6) | 1.5 (1.3 to 1.5) | 1.5 (1.3 to 1.5) | 1.9 (1.6 to 1.9) | 0.9 (1.8 to 0.9) | 1.7 (1.5 to 1.7) | 1.9 (1.8 to 1.9) | 0 (3.5 to 0) | 2 (1.9 to 2) | 2 (1.6 to 2) | 2.2 (1.6 to 2.2) | 2 (1.5 to 2) |
| Kazakhstan | 0.7 (0.6 to 0.7) | 0.5 (0.5 to 0.5) | 0.6 (0.5 to 0.6) | 0.7 (0.7 to 0.7) | 0.5 (0.5 to 0.5) | 0.5 (0.5 to 0.5) | 0.6 (0.6 to 0.6) | 0.9 (0.7 to 0.9) | 0.5 (0.5 to 0.5) | 0.8 (0.8 to 0.8) | 0.8 (0.7 to 0.8) | 0.8 (0.7 to 0.8) |
| Kenya | 1.5 (1.3 to 1.5) | 1.5 (1.3 to 1.5) | 1.5 (1.3 to 1.5) | 1.3 (1.2 to 1.3) | 1.2 (1.2 to 1.2) | 1.2 (1.2 to 1.2) | 1.6 (1.9 to 1.6) | 0 (3.5 to 0) | 1.6 (1.8 to 1.6) | 2 (1.2 to 2) | 1.9 (1.4 to 1.9) | 1.9 (1.2 to 1.9) |
| Kiribati | 1.6 (1.4 to 1.6) | 1.6 (1.4 to 1.6) | 1.6 (1.5 to 1.6) | 1.8 (1.6 to 1.8) | 1.8 (1.6 to 1.8) | 1.8 (1.6 to 1.8) | 3.5 (2.2 to 3.5) | 4.5 (2 to 4.5) | 3.7 (2.2 to 3.7) | 3 (1.7 to 3) | 2.2 (2.2 to 2.2) | 2.7 (1.8 to 2.7) |
| Kuwait | 0.9 (0.8 to 0.9) | 0.7 (0.7 to 0.7) | 0.8 (0.7 to 0.8) | 1.2 (1 to 1.2) | 0 (1.3 to 0) | 1.1 (1.1 to 1.1) | 1.2 (1 to 1.2) | 1.3 (0.9 to 1.3) | 1 (1 to 1) | 1.1 (1 to 1.1) | 0.7 (1.1 to 0.7) | 1 (1 to 1) |
| Kyrgyzstan | 1 (0.9 to 1) | 0.8 (0.7 to 0.8) | 0.9 (0.8 to 0.9) | 1.1 (1 to 1.1) | 1.1 (0.8 to 1.1) | 1 (0.9 to 1) | 1 (1 to 1) | 1.6 (0.6 to 1.6) | 1.1 (0.9 to 1.1) | 1.1 (1 to 1.1) | 1 (0.9 to 1) | 1 (0.9 to 1) |
| Lao People's Democratic Republic | 1.6 (1.4 to 1.6) | 1.6 (1.4 to 1.6) | 1.6 (1.4 to 1.6) | 1.9 (1.6 to 1.9) | 1.7 (1.6 to 1.7) | 1.8 (1.6 to 1.8) | 2.2 (2 to 2.2) | 3 (1.5 to 3) | 2.3 (1.9 to 2.3) | 2.3 (2.1 to 2.3) | 2 (1.9 to 2) | 2.2 (1.9 to 2.2) |
| Latvia | 0.9 (0.9 to 0.9) | 0.8 (0.7 to 0.8) | 0.9 (0.8 to 0.9) | 1.1 (1.1 to 1.1) | 1.2 (0.9 to 1.2) | 1.1 (1 to 1.1) | 1.1 (1 to 1.1) | 0.9 (1.3 to 0.9) | 1 (1 to 1) | 1 (0.9 to 1) | 0.9 (0.8 to 0.9) | 0.9 (0.9 to 0.9) |
| Lebanon | 1.3 (1.2 to 1.3) | 1.1 (1 to 1.1) | 1.2 (1 to 1.2) | 1.8 (1.5 to 1.8) | 1.6 (1.5 to 1.6) | 1.6 (1.4 to 1.6) | 2.1 (1.6 to 2.1) | 0 (2.2 to 0) | 1.9 (1.7 to 1.9) | 2 (1.6 to 2) | 1.5 (1.6 to 1.5) | 2 (1.4 to 2) |
| Lesotho | 2.1 (1.7 to 2.1) | 2.1 (1.7 to 2.1) | 2.1 (1.7 to 2.1) | 2.3 (1.9 to 2.3) | 2.3 (1.8 to 2.3) | 2.3 (1.8 to 2.3) | 2.2 (2 to 2.2) | 3.5 (1.6 to 3.5) | 2.5 (1.9 to 2.5) | 2.4 (2.3 to 2.4) | 2.2 (2.2 to 2.2) | 2.5 (2.2 to 2.5) |
| Liberia | 1.8 (1.6 to 1.8) | 1.9 (1.6 to 1.9) | 1.8 (1.6 to 1.8) | 2 (1.6 to 2) | 1.9 (1.6 to 1.9) | 2 (1.6 to 2) | 2.2 (2 to 2.2) | 2.2 (1.3 to 2.2) | 2.2 (1.9 to 2.2) | 2.2 (1.7 to 2.2) | 2.2 (2.2 to 2.2) | 2.1 (1.7 to 2.1) |
| Libya | 1.7 (1.5 to 1.7) | 1.5 (1.4 to 1.5) | 1.5 (1.5 to 1.5) | 1.9 (1.6 to 1.9) | 1.8 (1.5 to 1.8) | 1.8 (1.5 to 1.8) | 1.9 (1.9 to 1.9) | 2.2 (2.2 to 2.2) | 2.1 (1.8 to 2.1) | 1.8 (1.6 to 1.8) | 2 (1.6 to 2) | 1.7 (1.6 to 1.7) |
| Lithuania | 0.9 (0.9 to 0.9) | 0.8 (0.8 to 0.8) | 0.8 (0.8 to 0.8) | 1.1 (1 to 1.1) | 1 (0.9 to 1) | 1 (0.9 to 1) | 1.1 (1 to 1.1) | 0.9 (1.3 to 0.9) | 1.1 (0.9 to 1.1) | 1 (0.9 to 1) | 1 (0.9 to 1) | 1 (0.9 to 1) |
| Luxembourg | 0.8 (0.7 to 0.8) | 0.5 (0.5 to 0.5) | 0.6 (0.5 to 0.6) | 0.7 (0.8 to 0.7) | 0.9 (0.7 to 0.9) | 0.6 (0.6 to 0.6) | 0.7 (0.6 to 0.7) | 2.2 (0 to 2.2) | 0.6 (0.6 to 0.6) | 0.8 (0.7 to 0.8) | 0.5 (0.4 to 0.5) | 0.6 (0.6 to 0.6) |
| Madagascar | 1.6 (1.4 to 1.6) | 1.6 (1.4 to 1.6) | 1.6 (1.4 to 1.6) | 2 (1.6 to 2) | 2 (1.6 to 2) | 2 (1.6 to 2) | 1.8 (2 to 1.8) | 2.2 (2.2 to 2.2) | 2 (1.9 to 2) | 2.1 (1.8 to 2.1) | 2.5 (1.6 to 2.5) | 2.1 (1.8 to 2.1) |
| Malawi | 1.8 (1.5 to 1.8) | 1.8 (1.6 to 1.8) | 1.8 (1.6 to 1.8) | 1.9 (1.7 to 1.9) | 1.9 (1.6 to 1.9) | 1.9 (1.6 to 1.9) | 3 (1.9 to 3) | 2.2 (1.3 to 2.2) | 2.2 (2 to 2.2) | 3.2 (2 to 3.2) | 3.2 (1.8 to 3.2) | 3.1 (1.9 to 3.1) |
| Malaysia | 1.3 (1.1 to 1.3) | 1.2 (1 to 1.2) | 1.2 (1 to 1.2) | 1.6 (1.3 to 1.6) | 1.6 (1.2 to 1.6) | 1.5 (1.2 to 1.5) | 1.8 (1.5 to 1.8) | 1.3 (0.9 to 1.3) | 1.6 (1.5 to 1.6) | 1.8 (1.9 to 1.8) | 1.5 (1.6 to 1.5) | 1.7 (1.7 to 1.7) |
| Maldives | 1.5 (1.4 to 1.5) | 1.6 (1.4 to 1.6) | 1.5 (1.4 to 1.5) | 1.7 (1.5 to 1.7) | 1.1 (1.5 to 1.1) | 1.6 (1.4 to 1.6) | 2.2 (2.2 to 2.2) | Inf (0 to Inf) | 1.8 (2 to 1.8) | 1.8 (1.7 to 1.8) | 2 (1.6 to 2) | 1.8 (1.6 to 1.8) |
| Mali | 1.7 (1.5 to 1.7) | 1.7 (1.5 to 1.7) | 1.7 (1.5 to 1.7) | 1.8 (1.6 to 1.8) | 1.7 (1.5 to 1.7) | 1.8 (1.5 to 1.8) | 3 (1.9 to 3) | 2.2 (1.3 to 2.2) | 2.1 (2 to 2.1) | 2.7 (1.5 to 2.7) | 2.2 (2.2 to 2.2) | 2.2 (1.6 to 2.2) |
| Malta | 0.8 (0.8 to 0.8) | 0.7 (0.6 to 0.7) | 0.7 (0.6 to 0.7) | 1.1 (1.1 to 1.1) | 1.3 (0.9 to 1.3) | 1 (0.9 to 1) | 1 (0.9 to 1) | 0 (1.3 to 0) | 1 (0.9 to 1) | 0.9 (0.9 to 0.9) | 1 (0.8 to 1) | 0.9 (0.8 to 0.9) |
| Marshall Islands | 2.2 (1.8 to 2.2) | 2.2 (1.8 to 2.2) | 2.2 (1.8 to 2.2) | 2.3 (1.7 to 2.3) | 2.2 (1.6 to 2.2) | 2.2 (1.7 to 2.2) | 3.2 (2.6 to 3.2) | 3.3 (2.5 to 3.3) | 3.2 (2.7 to 3.2) | 2.7 (2.3 to 2.7) | 2.2 (2.4 to 2.2) | 2.6 (2.2 to 2.6) |
| Mauritania | 1.7 (1.4 to 1.7) | 1.6 (1.4 to 1.6) | 1.6 (1.4 to 1.6) | 2 (1.7 to 2) | 1.9 (1.6 to 1.9) | 1.9 (1.7 to 1.9) | 2.2 (2 to 2.2) | 2.2 (1.3 to 2.2) | 2.2 (1.8 to 2.2) | 2.5 (1.8 to 2.5) | 2.2 (1.8 to 2.2) | 2.4 (1.7 to 2.4) |
| Mauritius | 0.7 (0.7 to 0.7) | 0.6 (0.5 to 0.6) | 0.6 (0.5 to 0.6) | 0.8 (0.7 to 0.8) | 0.5 (0.7 to 0.5) | 0.7 (0.6 to 0.7) | 0.7 (0.6 to 0.7) | 0.5 (0.8 to 0.5) | 0.6 (0.5 to 0.6) | 0.8 (0.7 to 0.8) | 0.8 (0.5 to 0.8) | 0.6 (0.6 to 0.6) |
| Mexico | 0.7 (0.6 to 0.7) | 0.7 (0.6 to 0.7) | 0.7 (0.6 to 0.7) | 0.6 (0.6 to 0.6) | 0.6 (0.6 to 0.6) | 0.6 (0.6 to 0.6) | 0.7 (0.6 to 0.7) | 1.3 (0 to 1.3) | 0.6 (0.6 to 0.6) | 0.6 (0.5 to 0.6) | 0.7 (0.6 to 0.7) | 0.6 (0.6 to 0.6) |
| Micronesia (Federated States of) | 1.7 (1.5 to 1.7) | 1.7 (1.4 to 1.7) | 1.7 (1.4 to 1.7) | 1.9 (1.6 to 1.9) | 1.8 (1.6 to 1.8) | 1.8 (1.6 to 1.8) | 2.6 (2.2 to 2.6) | 2.2 (2.4 to 2.2) | 2.6 (2.2 to 2.6) | 2.7 (2 to 2.7) | 2.6 (1.9 to 2.6) | 2.7 (2.1 to 2.7) |
| Monaco | 1.5 (1.3 to 1.5) | 1.5 (1.3 to 1.5) | 1.5 (1.3 to 1.5) | 2.1 (1.7 to 2.1) | 2.2 (1.5 to 2.2) | 1.9 (1.7 to 1.9) | 2.2 (1.9 to 2.2) | 0 (2.2 to 0) | 2 (1.8 to 2) | 2.2 (2 to 2.2) | 2.2 (1.9 to 2.2) | 2.2 (2 to 2.2) |
| Mongolia | 1.2 (1.1 to 1.2) | 1.2 (1 to 1.2) | 1.2 (1 to 1.2) | 1.4 (1.3 to 1.4) | 1.3 (1.1 to 1.3) | 1.3 (1.2 to 1.3) | 1.9 (1.4 to 1.9) | 1.3 (1.6 to 1.3) | 1.7 (1.4 to 1.7) | 1.6 (1.2 to 1.6) | 1.3 (1.3 to 1.3) | 1.4 (1.2 to 1.4) |
| Montenegro | 1.1 (1 to 1.1) | 1 (0.8 to 1) | 0.9 (0.9 to 0.9) | 1.2 (1.1 to 1.2) | 1 (1.1 to 1) | 1.1 (1 to 1.1) | 1.2 (1.2 to 1.2) | 1.3 (0.9 to 1.3) | 1.2 (1.1 to 1.2) | 1.5 (1.3 to 1.5) | 1.2 (1.3 to 1.2) | 1.4 (1.2 to 1.4) |
| Morocco | 1.8 (1.6 to 1.8) | 1.7 (1.6 to 1.7) | 1.8 (1.7 to 1.8) | 1.9 (1.8 to 1.9) | 1.8 (1.6 to 1.8) | 1.8 (1.7 to 1.8) | 1.6 (1.9 to 1.6) | Inf (0 to Inf) | 2.1 (1.9 to 2.1) | 2.1 (1.9 to 2.1) | 2.2 (2 to 2.2) | 2.1 (1.8 to 2.1) |
| Mozambique | 1.9 (1.7 to 1.9) | 1.9 (1.6 to 1.9) | 1.9 (1.6 to 1.9) | 2.1 (2 to 2.1) | 2.1 (1.9 to 2.1) | 2.1 (1.9 to 2.1) | 2.2 (2.4 to 2.2) | 3.5 (2.2 to 3.5) | 2.6 (2.3 to 2.6) | 2.3 (1.8 to 2.3) | 2.2 (1.8 to 2.2) | 2.4 (1.8 to 2.4) |
| Myanmar | 1.5 (1.3 to 1.5) | 1.4 (1.3 to 1.4) | 1.5 (1.3 to 1.5) | 2 (1.6 to 2) | 1.7 (1.6 to 1.7) | 1.8 (1.6 to 1.8) | 2.2 (1.9 to 2.2) | 2.2 (2.2 to 2.2) | 2.1 (1.8 to 2.1) | 2 (1.9 to 2) | 1.8 (1.7 to 1.8) | 1.8 (1.7 to 1.8) |
| Namibia | 1.9 (1.6 to 1.9) | 1.9 (1.5 to 1.9) | 1.8 (1.5 to 1.8) | 2.1 (1.8 to 2.1) | 2.1 (1.6 to 2.1) | 2.1 (1.7 to 2.1) | 2.2 (2 to 2.2) | 2.2 (1.3 to 2.2) | 2.3 (1.9 to 2.3) | 2.4 (1.9 to 2.4) | 2.7 (1.7 to 2.7) | 2.2 (1.9 to 2.2) |
| Nauru | 2.4 (1.9 to 2.4) | 2.3 (1.9 to 2.3) | 2.3 (1.9 to 2.3) | 2.2 (1.7 to 2.2) | 2.2 (1.6 to 2.2) | 2.2 (1.6 to 2.2) | 3.2 (2.2 to 3.2) | 3 (2.2 to 3) | 3.2 (2.3 to 3.2) | 3 (2.4 to 3) | 2.6 (2.1 to 2.6) | 2.9 (2.3 to 2.9) |
| Nepal | 1.7 (1.5 to 1.7) | 1.6 (1.5 to 1.6) | 1.7 (1.5 to 1.7) | 1.9 (1.6 to 1.9) | 1.9 (1.4 to 1.9) | 1.8 (1.5 to 1.8) | 2.2 (3 to 2.2) | Inf (2.2 to Inf) | 2.6 (2.6 to 2.6) | 2.1 (2 to 2.1) | 2.2 (2 to 2.2) | 2.1 (2 to 2.1) |
| Netherlands | 0.8 (0.7 to 0.8) | 0.6 (0.5 to 0.6) | 0.6 (0.5 to 0.6) | 1 (1 to 1) | 0.6 (0.9 to 0.6) | 0.9 (0.8 to 0.9) | 0.9 (0.9 to 0.9) | 0 (2.2 to 0) | 0.9 (0.8 to 0.9) | 0.8 (0.8 to 0.8) | 0.5 (0.8 to 0.5) | 0.8 (0.7 to 0.8) |
| New Zealand | 0.6 (0.6 to 0.6) | 0.4 (0.5 to 0.4) | 0.5 (0.4 to 0.5) | 0.8 (0.8 to 0.8) | 0.9 (0.7 to 0.9) | 0.7 (0.7 to 0.7) | 0.8 (0.8 to 0.8) | 0 (1.3 to 0) | 0.7 (0.7 to 0.7) | 0.8 (0.8 to 0.8) | 1.1 (0.8 to 1.1) | 0.7 (0.7 to 0.7) |
| Nicaragua | 1.3 (1.2 to 1.3) | 1.4 (1 to 1.4) | 1.3 (1.2 to 1.3) | 1.4 (1.3 to 1.4) | 1.2 (1.2 to 1.2) | 1.3 (1.2 to 1.3) | 1.8 (1.7 to 1.8) | 0 (2.2 to 0) | 1.7 (1.6 to 1.7) | 1.7 (1.4 to 1.7) | 1.8 (1.5 to 1.8) | 1.6 (1.4 to 1.6) |
| Niger | 2 (1.7 to 2) | 2 (1.7 to 2) | 2 (1.7 to 2) | 1.9 (1.8 to 1.9) | 1.9 (1.7 to 1.9) | 1.9 (1.8 to 1.9) | 1.3 (2.2 to 1.3) | 0 (2.2 to 0) | 2.1 (1.9 to 2.1) | 1.8 (2 to 1.8) | 2.2 (2.2 to 2.2) | 2.2 (1.8 to 2.2) |
| Nigeria | 1.7 (1.5 to 1.7) | 1.6 (1.5 to 1.6) | 1.7 (1.5 to 1.7) | 1.9 (1.6 to 1.9) | 1.8 (1.5 to 1.8) | 1.8 (1.5 to 1.8) | 1.3 (1.6 to 1.3) | Inf (0 to Inf) | 1.7 (1.8 to 1.7) | 2 (1.7 to 2) | 2.2 (1.8 to 2.2) | 2.1 (1.5 to 2.1) |
| Niue | 1.5 (1.4 to 1.5) | 1.5 (1.3 to 1.5) | 1.5 (1.3 to 1.5) | 1.8 (1.5 to 1.8) | 1.7 (1.4 to 1.7) | 1.6 (1.5 to 1.6) | 2.7 (2.3 to 2.7) | 2.7 (2.2 to 2.7) | 2.6 (2.3 to 2.6) | 2.4 (1.8 to 2.4) | 2.2 (1.9 to 2.2) | 2.2 (1.8 to 2.2) |
| North Macedonia | 1.2 (1.1 to 1.2) | 1.1 (1 to 1.1) | 1 (1 to 1) | 1.4 (1.2 to 1.4) | 1.1 (1.1 to 1.1) | 1.3 (1.1 to 1.3) | 1.5 (1.3 to 1.5) | 2.2 (1.3 to 2.2) | 1.4 (1.3 to 1.4) | 1.6 (1.2 to 1.6) | 1.6 (1 to 1.6) | 1.4 (1.2 to 1.4) |
| Northern Mariana Islands | 1.3 (1.1 to 1.3) | 1.3 (1 to 1.3) | 1.2 (1.1 to 1.2) | 1.5 (1.3 to 1.5) | 1.4 (1.2 to 1.4) | 1.4 (1.3 to 1.4) | 1.7 (1.6 to 1.7) | 1.6 (1.3 to 1.6) | 1.6 (1.4 to 1.6) | 1.6 (1.4 to 1.6) | 1.3 (1.4 to 1.3) | 1.5 (1.3 to 1.5) |
| Norway | 0.6 (0.5 to 0.6) | 0.1 (0.3 to 0.1) | 0.3 (0.3 to 0.3) | 0.7 (0.6 to 0.7) | 0.4 (0.3 to 0.4) | 0.4 (0.4 to 0.4) | 0.5 (0.6 to 0.5) | 0 (0 to 0) | 0.4 (0.4 to 0.4) | 0.5 (0.5 to 0.5) | 0.5 (0 to 0.5) | 0.3 (0.3 to 0.3) |
| Oman | 1.6 (1.4 to 1.6) | 1.9 (1.4 to 1.9) | 1.5 (1.4 to 1.5) | 1.6 (1.6 to 1.6) | 0.9 (1.8 to 0.9) | 1.7 (1.5 to 1.7) | 1.3 (2.2 to 1.3) | NaN (Inf to NaN) | 2.2 (2 to 2.2) | 1.5 (1.8 to 1.5) | 2.2 (2.2 to 2.2) | 2 (1.6 to 2) |
| Pakistan | 1.4 (1.3 to 1.4) | 1.3 (1.2 to 1.3) | 1.4 (1.2 to 1.4) | 1.6 (1.3 to 1.6) | 1.4 (1.3 to 1.4) | 1.5 (1.3 to 1.5) | 1.7 (1.4 to 1.7) | 1.6 (1.1 to 1.6) | 1.7 (1.5 to 1.7) | 2.1 (1.5 to 2.1) | 2.1 (1.5 to 2.1) | 2 (1.5 to 2) |
| Palau | 1.5 (1.4 to 1.5) | 1.5 (1.3 to 1.5) | 1.5 (1.3 to 1.5) | 1.7 (1.5 to 1.7) | 1.6 (1.4 to 1.6) | 1.6 (1.4 to 1.6) | 1.6 (1.9 to 1.6) | Inf (0 to Inf) | 2.3 (1.7 to 2.3) | 2.2 (1.5 to 2.2) | 2.2 (1.3 to 2.2) | 2 (1.6 to 2) |
| Palestine | 1.2 (1.1 to 1.2) | 1 (0.9 to 1) | 1.1 (1 to 1.1) | 1.5 (1.6 to 1.5) | 2.2 (1.3 to 2.2) | 1.6 (1.3 to 1.6) | 1.9 (1.7 to 1.9) | 1.3 (2.2 to 1.3) | 1.9 (1.7 to 1.9) | 1.6 (1.4 to 1.6) | 1.3 (1.6 to 1.3) | 1.6 (1.3 to 1.6) |
| Panama | 1.2 (1 to 1.2) | 1 (0.9 to 1) | 1.1 (0.9 to 1.1) | 1.3 (1.1 to 1.3) | 1 (1 to 1) | 1.1 (1 to 1.1) | 1.3 (1.1 to 1.3) | 1.3 (1.6 to 1.3) | 1.1 (1 to 1.1) | 0.9 (0.9 to 0.9) | 1 (0.8 to 1) | 0.9 (0.8 to 0.9) |
| Papua New Guinea | 1.7 (1.5 to 1.7) | 1.7 (1.5 to 1.7) | 1.7 (1.5 to 1.7) | 1.9 (1.9 to 1.9) | 1.8 (1.9 to 1.8) | 1.8 (1.9 to 1.8) | 2.6 (2.2 to 2.6) | 3 (2.2 to 3) | 2.8 (2.4 to 2.8) | 2.6 (2 to 2.6) | 3 (1.9 to 3) | 2.7 (1.9 to 2.7) |
| Paraguay | 1.5 (1.4 to 1.5) | 1.4 (1.3 to 1.4) | 1.4 (1.3 to 1.4) | 1.6 (1.4 to 1.6) | 1.4 (1.4 to 1.4) | 1.5 (1.3 to 1.5) | 1.9 (1.7 to 1.9) | 1.3 (1.6 to 1.3) | 1.9 (1.6 to 1.9) | 1.8 (1.5 to 1.8) | 2.2 (1.3 to 2.2) | 1.7 (1.5 to 1.7) |
| Peru | 1.5 (1.3 to 1.5) | 1.4 (1.4 to 1.4) | 1.5 (1.3 to 1.5) | 1.6 (1.4 to 1.6) | 1.5 (1.3 to 1.5) | 1.5 (1.3 to 1.5) | 1.8 (1.6 to 1.8) | 1.3 (1.6 to 1.3) | 1.9 (1.5 to 1.9) | 1.6 (1.5 to 1.6) | 1.5 (1.4 to 1.5) | 1.6 (1.5 to 1.6) |
| Philippines | 0.9 (0.9 to 0.9) | 0.9 (0.8 to 0.9) | 0.9 (0.8 to 0.9) | 1 (0.9 to 1) | 0.9 (0.9 to 0.9) | 1 (0.8 to 1) | 1.4 (1 to 1.4) | 1.6 (0.6 to 1.6) | 1.4 (0.9 to 1.4) | 1.4 (1 to 1.4) | 1.5 (0.9 to 1.5) | 1.4 (0.9 to 1.4) |
| Poland | 0.7 (0.6 to 0.7) | 0.5 (0.4 to 0.5) | 0.5 (0.4 to 0.5) | 0.6 (0.6 to 0.6) | 0.5 (0.2 to 0.5) | 0.5 (0.4 to 0.5) | 0.6 (0.7 to 0.6) | 1.3 (0 to 1.3) | 0.5 (0.4 to 0.5) | 0.6 (0.6 to 0.6) | 0.5 (0.4 to 0.5) | 0.5 (0.4 to 0.5) |
| Portugal | 0.8 (0.7 to 0.8) | 0.6 (0.5 to 0.6) | 0.6 (0.6 to 0.6) | 1.1 (0.9 to 1.1) | 0.6 (0.8 to 0.6) | 0.9 (0.8 to 0.9) | 1 (1 to 1) | 2.2 (0 to 2.2) | 0.9 (0.9 to 0.9) | 0.8 (0.9 to 0.8) | 1.3 (0.5 to 1.3) | 0.8 (0.8 to 0.8) |
| Puerto Rico | 1.1 (0.9 to 1.1) | 1 (0.8 to 1) | 0.9 (0.8 to 0.9) | 1.3 (1.2 to 1.3) | 1.1 (1.2 to 1.1) | 1.1 (1 to 1.1) | 1.1 (1.1 to 1.1) | 1.6 (0.6 to 1.6) | 1.1 (1 to 1.1) | 1.1 (1 to 1.1) | 1.2 (0.8 to 1.2) | 1 (0.9 to 1) |
| Qatar | 1.5 (1.4 to 1.5) | 1.4 (1.3 to 1.4) | 1.4 (1.4 to 1.4) | 2.1 (1.6 to 2.1) | 1.3 (1.6 to 1.3) | 1.7 (1.5 to 1.7) | 2 (2.2 to 2) | 0 (3.5 to 0) | 2.1 (2.2 to 2.1) | 2.1 (1.7 to 2.1) | 1.8 (1.7 to 1.8) | 2.1 (1.7 to 2.1) |
| Republic of Korea | 1 (1 to 1) | 1 (0.7 to 1) | 0.9 (0.8 to 0.9) | 1.5 (1.3 to 1.5) | 1.3 (1.2 to 1.3) | 1.3 (1.2 to 1.3) | 1.7 (1.4 to 1.7) | 0 (2.2 to 0) | 1.8 (1.3 to 1.8) | 1.3 (1.1 to 1.3) | 1.5 (0.7 to 1.5) | 1.2 (1 to 1.2) |
| Republic of Moldova | 0.8 (0.8 to 0.8) | 0.7 (0.6 to 0.7) | 0.6 (0.6 to 0.6) | 0.8 (0.7 to 0.8) | 0.6 (0.5 to 0.6) | 0.6 (0.6 to 0.6) | 0.7 (0.7 to 0.7) | 1.3 (0 to 1.3) | 0.6 (0.6 to 0.6) | 0.8 (0.6 to 0.8) | 0.8 (0.6 to 0.8) | 0.7 (0.6 to 0.7) |
| Romania | 0.9 (0.9 to 0.9) | 0.8 (0.7 to 0.8) | 0.8 (0.7 to 0.8) | 1.1 (1 to 1.1) | 0.9 (0.8 to 0.9) | 0.9 (0.8 to 0.9) | 1.1 (1 to 1.1) | 1.3 (0.9 to 1.3) | 1 (0.9 to 1) | 1 (0.9 to 1) | 0.9 (0.9 to 0.9) | 0.9 (0.8 to 0.9) |
| Russian Federation | 0.4 (0.4 to 0.4) | 0.5 (0.4 to 0.5) | 0.4 (0.4 to 0.4) | 0.5 (0.4 to 0.5) | 0.5 (0.3 to 0.5) | 0.4 (0.4 to 0.4) | 0.5 (0.4 to 0.5) | 0.6 (0 to 0.6) | 0.5 (0.4 to 0.5) | 0.5 (0.4 to 0.5) | 0.5 (0.4 to 0.5) | 0.4 (0.4 to 0.4) |
| Rwanda | 1.7 (1.6 to 1.7) | 1.7 (1.5 to 1.7) | 1.7 (1.5 to 1.7) | 2 (1.6 to 2) | 1.9 (1.6 to 1.9) | 2 (1.6 to 2) | 1.8 (2 to 1.8) | 2.2 (2.2 to 2.2) | 2.1 (1.9 to 2.1) | 2.3 (1.8 to 2.3) | 2 (1.8 to 2) | 2.2 (1.7 to 2.2) |
| Saint Kitts and Nevis | 1.2 (1 to 1.2) | 1.1 (0.9 to 1.1) | 1.1 (0.9 to 1.1) | 1.3 (1 to 1.3) | 1.1 (1 to 1.1) | 1.1 (1 to 1.1) | 1.1 (1.1 to 1.1) | 1.3 (0.9 to 1.3) | 1.1 (0.9 to 1.1) | 1.2 (1 to 1.2) | 1.5 (0.8 to 1.5) | 1.1 (1 to 1.1) |
| Saint Lucia | 1 (0.9 to 1) | 0.8 (0.8 to 0.8) | 0.8 (0.8 to 0.8) | 1 (0.9 to 1) | 0.9 (0.8 to 0.9) | 0.9 (0.8 to 0.9) | 0.9 (0.9 to 0.9) | 0.5 (0.8 to 0.5) | 0.8 (0.7 to 0.8) | 0.9 (0.9 to 0.9) | 1 (0.8 to 1) | 0.9 (0.8 to 0.9) |
| Saint Vincent and the Grenadines | 0.9 (0.8 to 0.9) | 0.8 (0.7 to 0.8) | 0.8 (0.7 to 0.8) | 0.9 (0.8 to 0.9) | 0.7 (0.7 to 0.7) | 0.8 (0.7 to 0.8) | 1.6 (1.1 to 1.6) | 1.3 (0.9 to 1.3) | 1.4 (1.1 to 1.4) | 1 (1 to 1) | 0.9 (0.8 to 0.9) | 0.9 (0.8 to 0.9) |
| Samoa | 1.8 (1.5 to 1.8) | 1.7 (1.4 to 1.7) | 1.7 (1.4 to 1.7) | 2 (1.6 to 2) | 2 (1.6 to 2) | 2 (1.6 to 2) | 2.5 (2 to 2.5) | 2.2 (1.6 to 2.2) | 2.3 (1.9 to 2.3) | 2.1 (1.7 to 2.1) | 2.2 (1.6 to 2.2) | 2.1 (1.7 to 2.1) |
| San Marino | 2.3 (1.7 to 2.3) | 2.2 (1.6 to 2.2) | 2.2 (1.6 to 2.2) | 2.4 (1.9 to 2.4) | 3.5 (1.6 to 3.5) | 2.5 (1.9 to 2.5) | 2.2 (2 to 2.2) | NaN (Inf to NaN) | 2.4 (2 to 2.4) | 2.2 (1.8 to 2.2) | 2.2 (1.8 to 2.2) | 2.3 (1.8 to 2.3) |
| Sao Tome and Principe | 1.7 (1.5 to 1.7) | 1.7 (1.5 to 1.7) | 1.7 (1.5 to 1.7) | 2 (1.7 to 2) | 1.9 (1.6 to 1.9) | 1.9 (1.6 to 1.9) | 2.2 (2.2 to 2.2) | 2.2 (2.2 to 2.2) | 2.3 (2.1 to 2.3) | 2.7 (2.1 to 2.7) | 2.2 (2 to 2.2) | 2.6 (2.1 to 2.6) |
| Saudi Arabia | 1.6 (1.5 to 1.6) | 1.5 (1.3 to 1.5) | 1.6 (1.3 to 1.6) | 1.9 (1.8 to 1.9) | 1.3 (1.6 to 1.3) | 1.8 (1.7 to 1.8) | 2.1 (1.6 to 2.1) | 0 (3.5 to 0) | 2 (1.7 to 2) | 2 (1.8 to 2) | 1.3 (2 to 1.3) | 2 (1.7 to 2) |
| Senegal | 1.7 (1.6 to 1.7) | 1.6 (1.6 to 1.6) | 1.6 (1.6 to 1.6) | 1.8 (1.6 to 1.8) | 1.7 (1.6 to 1.7) | 1.8 (1.6 to 1.8) | 2.2 (2 to 2.2) | 2.2 (1.3 to 2.2) | 2.2 (1.9 to 2.2) | 2.2 (1.7 to 2.2) | 2.2 (2.2 to 2.2) | 2.3 (1.7 to 2.3) |
| Serbia | 1.2 (1 to 1.2) | 1 (0.9 to 1) | 1 (0.9 to 1) | 1.5 (1.3 to 1.5) | 1.3 (1.2 to 1.3) | 1.4 (1.2 to 1.4) | 1.8 (1.5 to 1.8) | 1.3 (0.9 to 1.3) | 1.8 (1.5 to 1.8) | 1.6 (1.3 to 1.6) | 1.3 (1.3 to 1.3) | 1.5 (1.2 to 1.5) |
| Seychelles | 1.3 (1.1 to 1.3) | 1.2 (1 to 1.2) | 1.2 (1 to 1.2) | 1.5 (1.3 to 1.5) | 1.3 (1.2 to 1.3) | 1.4 (1.2 to 1.4) | 1.6 (1.4 to 1.6) | 0.9 (1.8 to 0.9) | 1.6 (1.5 to 1.6) | 1.6 (1.5 to 1.6) | 1.5 (1.4 to 1.5) | 1.5 (1.4 to 1.5) |
| Sierra Leone | 1.8 (1.6 to 1.8) | 1.7 (1.5 to 1.7) | 1.8 (1.5 to 1.8) | 1.9 (1.6 to 1.9) | 1.8 (1.6 to 1.8) | 1.8 (1.6 to 1.8) | 3 (1.5 to 3) | 0 (2.2 to 0) | 2 (1.7 to 2) | 2 (1.8 to 2) | 2.2 (1.3 to 2.2) | 2 (1.7 to 2) |
| Singapore | 0.8 (0.7 to 0.8) | 0.4 (0.6 to 0.4) | 0.6 (0.5 to 0.6) | 1.1 (0.9 to 1.1) | 1.3 (0.5 to 1.3) | 0.9 (0.8 to 0.9) | 1 (0.9 to 1) | 0 (2.2 to 0) | 0.9 (0.9 to 0.9) | 1 (0.9 to 1) | 0.9 (0.7 to 0.9) | 0.8 (0.8 to 0.8) |
| Slovakia | 1.3 (1.1 to 1.3) | 1.2 (1 to 1.2) | 1.1 (1 to 1.1) | 1.6 (1.4 to 1.6) | 1.6 (1.2 to 1.6) | 1.4 (1.3 to 1.4) | 1.8 (1.6 to 1.8) | 2.2 (1.3 to 2.2) | 1.8 (1.5 to 1.8) | 1.6 (1.4 to 1.6) | 1.3 (1.5 to 1.3) | 1.6 (1.3 to 1.6) |
| Slovenia | 1.1 (0.9 to 1.1) | 1 (0.8 to 1) | 0.9 (0.9 to 0.9) | 1.3 (1.1 to 1.3) | 1.1 (0.8 to 1.1) | 1.2 (1.1 to 1.2) | 1.3 (1 to 1.3) | 0 (1.3 to 0) | 1.1 (1 to 1.1) | 1.1 (1.1 to 1.1) | 0.9 (0.7 to 0.9) | 1 (0.9 to 1) |
| Solomon Islands | 1.8 (1.5 to 1.8) | 1.7 (1.5 to 1.7) | 1.8 (1.5 to 1.8) | 1.9 (1.6 to 1.9) | 1.8 (1.6 to 1.8) | 1.8 (1.6 to 1.8) | 2.4 (2.1 to 2.4) | 1.8 (2.2 to 1.8) | 2.4 (2 to 2.4) | 2.5 (1.9 to 2.5) | 2.2 (2.2 to 2.2) | 2.4 (1.9 to 2.4) |
| Somalia | 2 (1.7 to 2) | 1.9 (1.7 to 1.9) | 1.9 (1.7 to 1.9) | 1.9 (1.7 to 1.9) | 1.8 (1.7 to 1.8) | 1.9 (1.7 to 1.9) | 2.2 (2 to 2.2) | 2.2 (3 to 2.2) | 2.5 (2 to 2.5) | 2.2 (1.9 to 2.2) | 2.2 (1.8 to 2.2) | 2.1 (1.9 to 2.1) |
| South Africa | 0.7 (0.6 to 0.7) | 0.7 (0.6 to 0.7) | 0.7 (0.6 to 0.7) | 0.8 (0.7 to 0.8) | 0.7 (0.6 to 0.7) | 0.7 (0.6 to 0.7) | 0.8 (1.2 to 0.8) | 2.2 (1.3 to 2.2) | 0.9 (1.4 to 0.9) | 0.9 (0.9 to 0.9) | 0.8 (0.9 to 0.8) | 0.9 (0.8 to 0.9) |
| South Sudan | 1.8 (1.5 to 1.8) | 1.7 (1.4 to 1.7) | 1.7 (1.5 to 1.7) | 1.9 (1.7 to 1.9) | 1.8 (1.6 to 1.8) | 1.8 (1.7 to 1.8) | 2.2 (1.8 to 2.2) | 2.2 (3 to 2.2) | 2.3 (1.9 to 2.3) | 2.1 (1.7 to 2.1) | 1.9 (1.6 to 1.9) | 2.1 (1.7 to 2.1) |
| Spain | 0.7 (0.7 to 0.7) | 0.6 (0.5 to 0.6) | 0.6 (0.5 to 0.6) | 1.1 (1 to 1.1) | 1.1 (0.4 to 1.1) | 0.9 (0.9 to 0.9) | 1.1 (0.9 to 1.1) | 0 (2.2 to 0) | 1 (0.9 to 1) | 0.9 (0.9 to 0.9) | 0.6 (0.9 to 0.6) | 0.8 (0.7 to 0.8) |
| Sri Lanka | 2 (1.5 to 2) | 1.9 (1.5 to 1.9) | 1.9 (1.5 to 1.9) | 2.2 (1.7 to 2.2) | 1.9 (1.6 to 1.9) | 2.2 (1.7 to 2.2) | 2.2 (1.9 to 2.2) | 2.2 (1.3 to 2.2) | 2.5 (1.9 to 2.5) | 2.2 (1.6 to 2.2) | 1.8 (2 to 1.8) | 2.1 (1.7 to 2.1) |
| Sudan | 2.4 (1.8 to 2.4) | 2.3 (1.8 to 2.3) | 2.3 (1.8 to 2.3) | 2.5 (1.9 to 2.5) | 2.2 (1.9 to 2.2) | 2.4 (1.8 to 2.4) | 3 (1.7 to 3) | 2.2 (1.3 to 2.2) | 2.5 (1.8 to 2.5) | 2.7 (2 to 2.7) | 3 (1.9 to 3) | 2.4 (2 to 2.4) |
| Suriname | 1.5 (1.3 to 1.5) | 1.3 (1.2 to 1.3) | 1.4 (1.2 to 1.4) | 1.6 (1.3 to 1.6) | 1.5 (1.3 to 1.5) | 1.5 (1.3 to 1.5) | 1.9 (1.6 to 1.9) | 1.6 (1.5 to 1.6) | 1.8 (1.7 to 1.8) | 1.7 (1.5 to 1.7) | 1.5 (1.4 to 1.5) | 1.6 (1.5 to 1.6) |
| Sweden | 0.8 (0.8 to 0.8) | 0.6 (0.7 to 0.6) | 0.8 (0.7 to 0.8) | 1 (1 to 1) | 1.1 (0.8 to 1.1) | 0.9 (0.8 to 0.9) | 0.9 (0.9 to 0.9) | 0 (0 to 0) | 1 (0.9 to 1) | 1 (0.8 to 1) | 0.6 (0.9 to 0.6) | 0.8 (0.7 to 0.8) |
| Switzerland | 0.8 (0.7 to 0.8) | 0.6 (0.5 to 0.6) | 0.6 (0.6 to 0.6) | 1.1 (1.1 to 1.1) | 0.7 (0.6 to 0.7) | 0.9 (0.9 to 0.9) | 0.9 (0.9 to 0.9) | 0 (2.2 to 0) | 0.9 (0.9 to 0.9) | 0.9 (1 to 0.9) | 0.9 (0.7 to 0.9) | 0.9 (0.8 to 0.9) |
| Syrian Arab Republic | 1.5 (1.3 to 1.5) | 1.4 (1.2 to 1.4) | 1.4 (1.3 to 1.4) | 1.9 (1.4 to 1.9) | 0.9 (1.8 to 0.9) | 1.6 (1.4 to 1.6) | 1.6 (1.5 to 1.6) | 2.2 (0 to 2.2) | 1.6 (1.4 to 1.6) | 1.7 (1.5 to 1.7) | 1.6 (1.1 to 1.6) | 1.6 (1.4 to 1.6) |
| Taiwan (Province of China) | 0.9 (0.8 to 0.9) | 0.7 (0.6 to 0.7) | 0.7 (0.6 to 0.7) | 1.1 (1 to 1.1) | 1 (0.8 to 1) | 0.9 (0.9 to 0.9) | 1 (1 to 1) | 0 (1.3 to 0) | 0.9 (0.9 to 0.9) | 1 (0.9 to 1) | 0.8 (0.9 to 0.8) | 0.8 (0.8 to 0.8) |
| Tajikistan | 2 (1.6 to 2) | 1.9 (1.6 to 1.9) | 1.9 (1.6 to 1.9) | 1.9 (1.6 to 1.9) | 2 (1.4 to 2) | 1.8 (1.5 to 1.8) | 2.4 (2.4 to 2.4) | 2.2 (2.6 to 2.2) | 2.5 (2.3 to 2.5) | 1.8 (1.5 to 1.8) | 1.6 (1.5 to 1.6) | 1.8 (1.4 to 1.8) |
| Thailand | 1.3 (1.2 to 1.3) | 1.3 (1.1 to 1.3) | 1.3 (1.2 to 1.3) | 1.6 (1.5 to 1.6) | 1.5 (1.4 to 1.5) | 1.5 (1.4 to 1.5) | 2 (1.7 to 2) | 2.2 (2.2 to 2.2) | 2 (1.6 to 2) | 2.3 (1.5 to 2.3) | 2.2 (1.3 to 2.2) | 2.2 (1.4 to 2.2) |
| Timor-Leste | 1.6 (1.4 to 1.6) | 1.5 (1.4 to 1.5) | 1.6 (1.4 to 1.6) | 1.9 (1.7 to 1.9) | 1.8 (1.6 to 1.8) | 1.8 (1.6 to 1.8) | 2 (2 to 2) | 1.3 (2.2 to 1.3) | 2.2 (1.9 to 2.2) | 2.1 (1.8 to 2.1) | 2.2 (1.7 to 2.2) | 2.1 (1.7 to 2.1) |
| Togo | 1.8 (1.6 to 1.8) | 1.8 (1.6 to 1.8) | 1.8 (1.6 to 1.8) | 1.9 (1.6 to 1.9) | 1.9 (1.5 to 1.9) | 1.9 (1.6 to 1.9) | 2.2 (1.6 to 2.2) | 2.2 (1.3 to 2.2) | 2.1 (1.7 to 2.1) | 2.2 (1.7 to 2.2) | 2.2 (2.2 to 2.2) | 2.2 (1.8 to 2.2) |
| Tokelau | 1.6 (1.3 to 1.6) | 1.5 (1.3 to 1.5) | 1.5 (1.3 to 1.5) | 1.8 (1.5 to 1.8) | 1.7 (1.5 to 1.7) | 1.7 (1.5 to 1.7) | 2.4 (1.8 to 2.4) | 2.2 (1.6 to 2.2) | 2.3 (1.8 to 2.3) | 2.2 (1.7 to 2.2) | 2.2 (1.5 to 2.2) | 2.2 (1.7 to 2.2) |
| Tonga | 1.6 (1.3 to 1.6) | 1.5 (1.3 to 1.5) | 1.5 (1.3 to 1.5) | 1.8 (1.6 to 1.8) | 1.7 (1.5 to 1.7) | 1.7 (1.5 to 1.7) | 2.4 (1.9 to 2.4) | 3 (1.9 to 3) | 2.3 (1.9 to 2.3) | 2.5 (1.8 to 2.5) | 3 (1.9 to 3) | 2.5 (1.9 to 2.5) |
| Trinidad and Tobago | 1.2 (1.1 to 1.2) | 1.2 (0.9 to 1.2) | 1.1 (1 to 1.1) | 1.3 (1.1 to 1.3) | 1.2 (1 to 1.2) | 1.2 (1 to 1.2) | 1.3 (1.1 to 1.3) | 1.2 (0.8 to 1.2) | 1.2 (1 to 1.2) | 1.3 (1.1 to 1.3) | 1.4 (1 to 1.4) | 1.2 (1 to 1.2) |
| Tunisia | 1.7 (1.4 to 1.7) | 1.5 (1.4 to 1.5) | 1.6 (1.4 to 1.6) | 1.9 (1.6 to 1.9) | 2.2 (1.3 to 2.2) | 1.9 (1.6 to 1.9) | 2.2 (1.9 to 2.2) | Inf (2.2 to Inf) | 2.2 (1.7 to 2.2) | 2.1 (1.6 to 2.1) | 1.3 (2 to 1.3) | 1.9 (1.6 to 1.9) |
| Turkmenistan | 1.1 (1 to 1.1) | 1 (1 to 1) | 1 (1 to 1) | 1.1 (1.1 to 1.1) | 1.1 (1 to 1.1) | 1 (1 to 1) | 0.9 (1 to 0.9) | 1.3 (0.9 to 1.3) | 1 (1 to 1) | 1.2 (1.1 to 1.2) | 1.1 (1.2 to 1.1) | 1.1 (1.1 to 1.1) |
| Tuvalu | 1.7 (1.5 to 1.7) | 1.7 (1.4 to 1.7) | 1.7 (1.5 to 1.7) | 1.8 (1.6 to 1.8) | 1.9 (1.5 to 1.9) | 1.8 (1.6 to 1.8) | 2.3 (2 to 2.3) | 2.7 (2.2 to 2.7) | 2.5 (2 to 2.5) | 2.3 (1.9 to 2.3) | 1.8 (1.7 to 1.8) | 2.3 (1.8 to 2.3) |
| Türkiye | 1.3 (1.1 to 1.3) | 1.2 (1 to 1.2) | 1.2 (1 to 1.2) | 1.6 (1.4 to 1.6) | 1.6 (1.5 to 1.6) | 1.6 (1.4 to 1.6) | 1.9 (1.5 to 1.9) | 2.2 (1.3 to 2.2) | 1.9 (1.5 to 1.9) | 1.6 (1.3 to 1.6) | 1.3 (1.4 to 1.3) | 1.6 (1.2 to 1.6) |
| Uganda | 1.6 (1.4 to 1.6) | 1.6 (1.4 to 1.6) | 1.6 (1.4 to 1.6) | 1.9 (1.5 to 1.9) | 1.8 (1.4 to 1.8) | 1.8 (1.5 to 1.8) | 2 (1.9 to 2) | 1.3 (2.2 to 1.3) | 2.2 (1.8 to 2.2) | 2.3 (1.8 to 2.3) | 2.2 (1.6 to 2.2) | 2.2 (1.6 to 2.2) |
| Ukraine | 2 (1.6 to 2) | 1.9 (1.6 to 1.9) | 2 (1.6 to 2) | 2 (1.6 to 2) | 2 (1.5 to 2) | 2 (1.6 to 2) | 2.1 (1.6 to 2.1) | 2.2 (1.3 to 2.2) | 1.9 (1.6 to 1.9) | 2 (1.6 to 2) | 2 (1.6 to 2) | 2 (1.5 to 2) |
| United Arab Emirates | 1.6 (1.4 to 1.6) | 1.5 (1.3 to 1.5) | 1.5 (1.3 to 1.5) | 1.8 (1.5 to 1.8) | 1.6 (1.3 to 1.6) | 1.7 (1.5 to 1.7) | 1.8 (1.8 to 1.8) | 1.3 (2.2 to 1.3) | 1.8 (1.8 to 1.8) | 1.8 (1.6 to 1.8) | 1.8 (1.6 to 1.8) | 1.7 (1.5 to 1.7) |
| United Kingdom | 0.2 (0.2 to 0.2) | 0.1 (0.2 to 0.1) | 0.2 (0.2 to 0.2) | 0.3 (0.4 to 0.3) | 0.3 (0 to 0.3) | 0.2 (0.2 to 0.2) | 0.1 (0.3 to 0.1) | 0 (0 to 0) | 0.2 (0.2 to 0.2) | 0.2 (0.2 to 0.2) | 0 (0.4 to 0) | 0.1 (0.2 to 0.1) |
| United Republic of Tanzania | 1.7 (1.5 to 1.7) | 1.6 (1.5 to 1.6) | 1.7 (1.5 to 1.7) | 1.8 (1.6 to 1.8) | 1.7 (1.5 to 1.7) | 1.8 (1.5 to 1.8) | 2.2 (1.8 to 2.2) | 2.2 (2.2 to 2.2) | 1.9 (1.8 to 1.9) | 2.1 (1.7 to 2.1) | 2.2 (1.5 to 2.2) | 2 (1.6 to 2) |
| United States Virgin Islands | 1.7 (1.6 to 1.7) | 1.6 (1.5 to 1.6) | 1.7 (1.6 to 1.7) | 1.9 (1.6 to 1.9) | 1.8 (1.4 to 1.8) | 1.8 (1.5 to 1.8) | 2.4 (2.4 to 2.4) | 3 (2.2 to 3) | 2.3 (2.5 to 2.3) | 2.1 (1.8 to 2.1) | 2.1 (1.6 to 2.1) | 2 (1.6 to 2) |
| United States of America | 0.2 (0.2 to 0.2) | 0.2 (0.2 to 0.2) | 0.2 (0.2 to 0.2) | 0.2 (0.3 to 0.2) | 0.3 (0 to 0.3) | 0.2 (0.2 to 0.2) | 0.2 (0.2 to 0.2) | 0 (0 to 0) | 0.2 (0.3 to 0.2) | 0.2 (0.2 to 0.2) | 0 (0.4 to 0) | 0.2 (0.2 to 0.2) |
| Uruguay | 0.8 (0.7 to 0.8) | 0.6 (0.6 to 0.6) | 0.6 (0.6 to 0.6) | 1 (0.9 to 1) | 0.8 (0.7 to 0.8) | 0.8 (0.8 to 0.8) | 1 (0.8 to 1) | 0 (1.3 to 0) | 0.9 (0.8 to 0.9) | 0.9 (0.9 to 0.9) | 0.6 (0.9 to 0.6) | 0.8 (0.8 to 0.8) |
| Uzbekistan | 1 (0.9 to 1) | 0.9 (0.8 to 0.9) | 0.9 (0.8 to 0.9) | 1.1 (1 to 1.1) | 1.1 (0.8 to 1.1) | 1.1 (0.9 to 1.1) | 1.3 (1 to 1.3) | 0.9 (0.7 to 0.9) | 1.1 (0.9 to 1.1) | 1.1 (0.9 to 1.1) | 0.9 (1 to 0.9) | 0.9 (0.9 to 0.9) |
| Vanuatu | 1.6 (1.4 to 1.6) | 1.6 (1.3 to 1.6) | 1.6 (1.3 to 1.6) | 1.7 (1.5 to 1.7) | 1.6 (1.5 to 1.6) | 1.6 (1.4 to 1.6) | 2.4 (1.8 to 2.4) | 2.2 (2 to 2.2) | 2.5 (1.9 to 2.5) | 2.6 (2.4 to 2.6) | 2.2 (2.6 to 2.2) | 2.6 (2.3 to 2.6) |
| Venezuela (Bolivarian Republic of) | 1.3 (1.1 to 1.3) | 1.2 (1 to 1.2) | 1.1 (1 to 1.1) | 1.4 (1.1 to 1.4) | 1.3 (1 to 1.3) | 1.3 (1 to 1.3) | 1.5 (1 to 1.5) | 2.2 (0.7 to 2.2) | 1.4 (1.1 to 1.4) | 1.4 (1.2 to 1.4) | 1.2 (1 to 1.2) | 1.3 (1.1 to 1.3) |
| Viet Nam | 1.5 (1.4 to 1.5) | 1.4 (1.3 to 1.4) | 1.5 (1.3 to 1.5) | 1.8 (1.6 to 1.8) | 1.5 (1.5 to 1.5) | 1.6 (1.5 to 1.6) | 1.9 (1.6 to 1.9) | 0 (2.2 to 0) | 2 (1.7 to 2) | 2 (1.8 to 2) | 1.6 (1.5 to 1.6) | 1.9 (1.7 to 1.9) |
| Yemen | 1.9 (1.6 to 1.9) | 1.7 (1.6 to 1.7) | 1.8 (1.5 to 1.8) | 2.1 (1.8 to 2.1) | 2 (1.6 to 2) | 2.1 (1.7 to 2.1) | 2.2 (2.2 to 2.2) | 0 (2.2 to 0) | 2.1 (1.8 to 2.1) | 2.5 (2.1 to 2.5) | 2.2 (1.8 to 2.2) | 2.6 (2.1 to 2.6) |
| Zambia | 2.6 (2 to 2.6) | 2.5 (2 to 2.5) | 2.6 (2 to 2.6) | 2 (2.3 to 2) | 2 (2.2 to 2) | 2 (2.2 to 2) | 3.5 (3.2 to 3.5) | 4.5 (3 to 4.5) | 3.3 (3.1 to 3.3) | 2.2 (1.9 to 2.2) | 2 (1.8 to 2) | 2.3 (1.8 to 2.3) |
| Zimbabwe | 1.7 (1.5 to 1.7) | 1.6 (1.5 to 1.6) | 1.6 (1.5 to 1.6) | 1.9 (1.6 to 1.9) | 1.8 (1.5 to 1.8) | 1.8 (1.5 to 1.8) | 2.6 (2 to 2.6) | 2.2 (2 to 2.2) | 2.5 (2 to 2.5) | 2 (1.7 to 2) | 2.2 (1.6 to 2.2) | 2 (1.7 to 2) |

ASIR = age-standardised incidence rate, deaths, ASMR = age-standardised mortality rate, DALYs = disability-adjusted life years, ASDR = age-standardised rate of DALYs, AAPC = average annual percent chang

# Table S4 Age-standardized DALYs rates for female breast cancer attributable to 7 risk factors in 2021

| **Locations** | **Risk factor** | **Female breast cancer, per 100,000** |
| --- | --- | --- |
| Global | Alcohol use | 5.83 (4.88 - 6.78) |
| Global | Diet high in red meat | 24.73 (10.58 - 38.87) |
| Global | High body-mass index | -8.28 (-13.18 - -3.37) |
| Global | High fasting plasma glucose | 5.20 (1.21 - 9.19) |
| Global | Low physical activity | 2.95 (1.59 - 4.30) |
| Global | Secondhand smoke | 3.19 (1.04 - 5.34) |
| Global | Smoking | 2.54 (2.16 - 2.92) |
| High SDI | Alcohol use | 15.53 (13.03 - 18.02) |
| High SDI | Diet high in red meat | 24.77 (10.24 - 39.30) |
| High SDI | High body-mass index | -9.12 (-14.58 - -3.66) |
| High SDI | High fasting plasma glucose | 4.75 (1.15 - 8.34) |
| High SDI | Low physical activity | 3.34 (1.81 - 4.87) |
| High SDI | Secondhand smoke | 1.87 (0.58 - 3.16) |
| High SDI | Smoking | 6.21 (5.30 - 7.13) |
| High-middle SDI | Alcohol use | 7.29 (6.00 - 8.58) |
| High-middle SDI | Diet high in red meat | 24.70 (10.30 - 39.10) |
| High-middle SDI | High body-mass index | -6.49 (-10.50 - -2.47) |
| High-middle SDI | High fasting plasma glucose | 4.50 (1.02 - 7.97) |
| High-middle SDI | Low physical activity | 2.42 (1.23 - 3.60) |
| High-middle SDI | Secondhand smoke | 3.53 (1.10 - 5.96) |
| High-middle SDI | Smoking | 4.12 (3.49 - 4.76) |
| Middle SDI | Alcohol use | 3.39 (2.74 - 4.05) |
| Middle SDI | Diet high in red meat | 24.47 (10.09 - 38.86) |
| Middle SDI | High body-mass index | -6.93 (-11.09 - -2.77) |
| Middle SDI | High fasting plasma glucose | 5.37 (1.18 - 9.55) |
| Middle SDI | Low physical activity | 3.25 (1.75 - 4.74) |
| Middle SDI | Secondhand smoke | 3.53 (1.13 - 5.92) |
| Middle SDI | Smoking | 1.43 (1.17 - 1.69) |
| Low-middle SDI | Alcohol use | 2.66 (2.04 - 3.27) |
| Low-middle SDI | Diet high in red meat | 24.34 (10.39 - 38.29) |
| Low-middle SDI | High body-mass index | -10.56 (-16.71 - -4.41) |
| Low-middle SDI | High fasting plasma glucose | 6.14 (1.50 - 10.77) |
| Low-middle SDI | Low physical activity | 2.97 (1.59 - 4.35) |
| Low-middle SDI | Secondhand smoke | 3.57 (1.19 - 5.96) |
| Low-middle SDI | Smoking | 1.12 (0.88 - 1.37) |
| Low SDI | Alcohol use | 4.35 (3.22 - 5.48) |
| Low SDI | Diet high in red meat | 25.64 (11.04 - 40.24) |
| Low SDI | High body-mass index | -9.40 (-15.04 - -3.76) |
| Low SDI | High fasting plasma glucose | 4.47 (1.08 - 7.86) |
| Low SDI | Low physical activity | 2.31 (1.24 - 3.39) |
| Low SDI | Secondhand smoke | 2.39 (0.82 - 3.97) |
| Low SDI | Smoking | 1.07 (0.85 - 1.29) |
| American Samoa | Alcohol use | 1.38 (0.27 - 2.49) |
| American Samoa | Diet high in red meat | 86.20 (33.10 - 139.30) |
| American Samoa | High body-mass index | 0.00 (0.00 - 0.00) |
| American Samoa | High fasting plasma glucose | 33.53 (6.06 - 61.01) |
| American Samoa | Low physical activity | 23.52 (12.01 - 35.02) |
| American Samoa | Secondhand smoke | 10.83 (2.76 - 18.90) |
| American Samoa | Smoking | 21.74 (13.50 - 29.99) |
| Antigua and Barbuda | Alcohol use | 11.22 (7.51 - 14.93) |
| Antigua and Barbuda | Diet high in red meat | 41.52 (16.27 - 66.76) |
| Antigua and Barbuda | High body-mass index | -21.34 (-34.76 - -7.92) |
| Antigua and Barbuda | High fasting plasma glucose | 8.38 (0.96 - 15.80) |
| Antigua and Barbuda | Low physical activity | 5.75 (2.09 - 9.42) |
| Antigua and Barbuda | Secondhand smoke | 2.00 (0.48 - 3.52) |
| Antigua and Barbuda | Smoking | 4.37 (2.78 - 5.95) |
| Arab Republic of Egypt | Alcohol use | 0.10 (0.06 - 0.15) |
| Arab Republic of Egypt | Diet high in red meat | 31.72 (12.10 - 51.35) |
| Arab Republic of Egypt | High body-mass index | -20.72 (-33.48 - -7.96) |
| Arab Republic of Egypt | High fasting plasma glucose | 5.26 (0.72 - 9.81) |
| Arab Republic of Egypt | Low physical activity | 6.06 (2.77 - 9.35) |
| Arab Republic of Egypt | Secondhand smoke | 4.55 (1.40 - 7.71) |
| Arab Republic of Egypt | Smoking | 0.35 (0.18 - 0.52) |
| Argentine Republic | Alcohol use | 20.71 (15.96 - 25.45) |
| Argentine Republic | Diet high in red meat | 35.44 (14.46 - 56.42) |
| Argentine Republic | High body-mass index | -18.10 (-29.39 - -6.80) |
| Argentine Republic | High fasting plasma glucose | 7.01 (1.13 - 12.89) |
| Argentine Republic | Low physical activity | 2.37 (0.52 - 4.22) |
| Argentine Republic | Secondhand smoke | 3.57 (1.12 - 6.01) |
| Argentine Republic | Smoking | 11.22 (8.45 - 13.99) |
| Australia | Alcohol use | 20.92 (16.84 - 24.99) |
| Australia | Diet high in red meat | 23.30 (9.23 - 37.37) |
| Australia | High body-mass index | -10.88 (-17.85 - -3.90) |
| Australia | High fasting plasma glucose | 4.51 (0.47 - 8.55) |
| Australia | Low physical activity | 4.92 (2.42 - 7.41) |
| Australia | Secondhand smoke | 1.27 (0.28 - 2.26) |
| Australia | Smoking | 7.36 (5.47 - 9.24) |
| Barbados | Alcohol use | 22.00 (15.32 - 28.68) |
| Barbados | Diet high in red meat | 54.62 (21.58 - 87.66) |
| Barbados | High body-mass index | -31.27 (-50.37 - -12.18) |
| Barbados | High fasting plasma glucose | 13.35 (1.88 - 24.82) |
| Barbados | Low physical activity | 13.20 (6.65 - 19.75) |
| Barbados | Secondhand smoke | 1.88 (0.53 - 3.23) |
| Barbados | Smoking | 3.68 (2.40 - 4.97) |
| Belize | Alcohol use | 6.39 (4.43 - 8.36) |
| Belize | Diet high in red meat | 24.78 (9.89 - 39.68) |
| Belize | High body-mass index | -14.17 (-22.88 - -5.45) |
| Belize | High fasting plasma glucose | 4.90 (0.93 - 8.88) |
| Belize | Low physical activity | 3.44 (1.19 - 5.69) |
| Belize | Secondhand smoke | 1.82 (0.50 - 3.13) |
| Belize | Smoking | 1.75 (1.10 - 2.41) |
| Bermuda | Alcohol use | 14.93 (10.53 - 19.33) |
| Bermuda | Diet high in red meat | 32.00 (12.51 - 51.48) |
| Bermuda | High body-mass index | -17.59 (-28.63 - -6.55) |
| Bermuda | High fasting plasma glucose | 8.35 (0.65 - 16.05) |
| Bermuda | Low physical activity | 4.45 (1.63 - 7.27) |
| Bermuda | Secondhand smoke | 1.93 (0.47 - 3.39) |
| Bermuda | Smoking | 5.62 (3.79 - 7.46) |
| Bolivarian Republic of Venezuela | Alcohol use | 5.37 (3.08 - 7.65) |
| Bolivarian Republic of Venezuela | Diet high in red meat | 41.64 (16.36 - 66.93) |
| Bolivarian Republic of Venezuela | High body-mass index | -22.55 (-36.50 - -8.60) |
| Bolivarian Republic of Venezuela | High fasting plasma glucose | 7.02 (1.12 - 12.92) |
| Bolivarian Republic of Venezuela | Low physical activity | 3.77 (1.05 - 6.49) |
| Bolivarian Republic of Venezuela | Secondhand smoke | 3.10 (0.82 - 5.38) |
| Bolivarian Republic of Venezuela | Smoking | 5.00 (3.05 - 6.94) |
| Bosnia and Herzegovina | Alcohol use | 5.12 (3.33 - 6.91) |
| Bosnia and Herzegovina | Diet high in red meat | 20.82 (6.98 - 34.66) |
| Bosnia and Herzegovina | High body-mass index | -9.87 (-16.66 - -3.08) |
| Bosnia and Herzegovina | High fasting plasma glucose | 3.38 (0.08 - 6.67) |
| Bosnia and Herzegovina | Low physical activity | 1.51 (0.30 - 2.72) |
| Bosnia and Herzegovina | Secondhand smoke | 2.11 (0.55 - 3.67) |
| Bosnia and Herzegovina | Smoking | 10.07 (7.07 - 13.06) |
| Brunei Darussalam | Alcohol use | 1.43 (0.70 - 2.16) |
| Brunei Darussalam | Diet high in red meat | 42.76 (14.98 - 70.54) |
| Brunei Darussalam | High body-mass index | 0.00 (0.00 - 0.00) |
| Brunei Darussalam | High fasting plasma glucose | 9.79 (1.29 - 18.30) |
| Brunei Darussalam | Low physical activity | 6.48 (2.34 - 10.63) |
| Brunei Darussalam | Secondhand smoke | 3.38 (0.89 - 5.88) |
| Brunei Darussalam | Smoking | 3.65 (2.18 - 5.11) |
| Burkina Faso | Alcohol use | 10.09 (6.14 - 14.03) |
| Burkina Faso | Diet high in red meat | 41.85 (15.40 - 68.29) |
| Burkina Faso | High body-mass index | -11.82 (-19.34 - -4.31) |
| Burkina Faso | High fasting plasma glucose | 3.77 (0.64 - 6.90) |
| Burkina Faso | Low physical activity | 2.11 (0.50 - 3.71) |
| Burkina Faso | Secondhand smoke | 3.38 (0.91 - 5.86) |
| Burkina Faso | Smoking | 0.48 (0.27 - 0.68) |
| Canada | Alcohol use | 16.10 (12.36 - 19.84) |
| Canada | Diet high in red meat | 23.86 (9.68 - 38.04) |
| Canada | High body-mass index | -10.09 (-16.09 - -4.09) |
| Canada | High fasting plasma glucose | 2.58 (0.44 - 4.72) |
| Canada | Low physical activity | 1.51 (0.23 - 2.79) |
| Canada | Secondhand smoke | 1.86 (0.55 - 3.16) |
| Canada | Smoking | 7.30 (5.38 - 9.21) |
| Central African Republic | Alcohol use | 5.83 (2.45 - 9.20) |
| Central African Republic | Diet high in red meat | 36.62 (11.44 - 61.80) |
| Central African Republic | High body-mass index | -10.46 (-18.31 - -2.61) |
| Central African Republic | High fasting plasma glucose | 8.69 (0.63 - 16.75) |
| Central African Republic | Low physical activity | 3.38 (0.74 - 6.02) |
| Central African Republic | Secondhand smoke | 2.04 (0.40 - 3.69) |
| Central African Republic | Smoking | 0.89 (0.40 - 1.38) |
| Commonwealth of Dominica | Alcohol use | 14.87 (9.68 - 20.05) |
| Commonwealth of Dominica | Diet high in red meat | 49.88 (17.48 - 82.28) |
| Commonwealth of Dominica | High body-mass index | -28.97 (-47.09 - -10.85) |
| Commonwealth of Dominica | High fasting plasma glucose | 14.24 (2.06 - 26.42) |
| Commonwealth of Dominica | Low physical activity | 5.64 (1.72 - 9.57) |
| Commonwealth of Dominica | Secondhand smoke | 2.67 (0.68 - 4.66) |
| Commonwealth of Dominica | Smoking | 3.55 (2.03 - 5.07) |
| Commonwealth of the Bahamas | Alcohol use | 18.96 (11.25 - 26.68) |
| Commonwealth of the Bahamas | Diet high in red meat | 81.72 (33.22 - 130.23) |
| Commonwealth of the Bahamas | High body-mass index | -44.20 (-71.20 - -17.19) |
| Commonwealth of the Bahamas | High fasting plasma glucose | 19.44 (3.51 - 35.37) |
| Commonwealth of the Bahamas | Low physical activity | 11.27 (3.90 - 18.63) |
| Commonwealth of the Bahamas | Secondhand smoke | 3.75 (0.99 - 6.52) |
| Commonwealth of the Bahamas | Smoking | 6.08 (3.97 - 8.19) |
| Cook Islands | Alcohol use | 32.05 (21.87 - 42.23) |
| Cook Islands | Diet high in red meat | 72.12 (27.63 - 116.61) |
| Cook Islands | High body-mass index | 0.00 (0.00 - 0.00) |
| Cook Islands | High fasting plasma glucose | 25.81 (4.60 - 47.01) |
| Cook Islands | Low physical activity | 13.01 (5.49 - 20.53) |
| Cook Islands | Secondhand smoke | 7.21 (1.92 - 12.49) |
| Cook Islands | Smoking | 16.44 (10.73 - 22.16) |
| Czech Republic | Alcohol use | 16.34 (12.84 - 19.83) |
| Czech Republic | Diet high in red meat | 21.94 (9.50 - 34.39) |
| Czech Republic | High body-mass index | -9.08 (-14.62 - -3.53) |
| Czech Republic | High fasting plasma glucose | 3.15 (0.41 - 5.89) |
| Czech Republic | Low physical activity | 2.09 (0.75 - 3.44) |
| Czech Republic | Secondhand smoke | 2.08 (0.60 - 3.56) |
| Czech Republic | Smoking | 7.14 (5.48 - 8.80) |
| Democratic People's Republic of Korea | Alcohol use | 2.03 (1.00 - 3.07) |
| Democratic People's Republic of Korea | Diet high in red meat | 29.48 (9.43 - 49.54) |
| Democratic People's Republic of Korea | High body-mass index | 0.00 (0.00 - 0.00) |
| Democratic People's Republic of Korea | High fasting plasma glucose | 4.55 (0.23 - 8.86) |
| Democratic People's Republic of Korea | Low physical activity | 3.12 (0.81 - 5.44) |
| Democratic People's Republic of Korea | Secondhand smoke | 5.24 (1.21 - 9.27) |
| Democratic People's Republic of Korea | Smoking | 1.41 (0.64 - 2.18) |
| Democratic Republic of Sao Tome and Principe | Alcohol use | 7.66 (4.59 - 10.73) |
| Democratic Republic of Sao Tome and Principe | Diet high in red meat | 16.85 (4.64 - 29.05) |
| Democratic Republic of Sao Tome and Principe | High body-mass index | -14.82 (-25.23 - -4.40) |
| Democratic Republic of Sao Tome and Principe | High fasting plasma glucose | 4.31 (0.32 - 8.30) |
| Democratic Republic of Sao Tome and Principe | Low physical activity | 2.35 (0.49 - 4.21) |
| Democratic Republic of Sao Tome and Principe | Secondhand smoke | 1.11 (0.22 - 2.01) |
| Democratic Republic of Sao Tome and Principe | Smoking | 0.48 (0.24 - 0.73) |
| Democratic Republic of Timor-Leste | Alcohol use | 0.92 (0.45 - 1.38) |
| Democratic Republic of Timor-Leste | Diet high in red meat | 27.25 (9.05 - 45.44) |
| Democratic Republic of Timor-Leste | High body-mass index | 0.00 (0.00 - 0.00) |
| Democratic Republic of Timor-Leste | High fasting plasma glucose | 2.51 (0.05 - 4.96) |
| Democratic Republic of Timor-Leste | Low physical activity | 1.76 (0.35 - 3.18) |
| Democratic Republic of Timor-Leste | Secondhand smoke | 5.57 (1.21 - 9.92) |
| Democratic Republic of Timor-Leste | Smoking | 1.19 (0.58 - 1.79) |
| Democratic Republic of the Congo | Alcohol use | 6.03 (2.67 - 9.38) |
| Democratic Republic of the Congo | Diet high in red meat | 16.68 (3.85 - 29.50) |
| Democratic Republic of the Congo | High body-mass index | -9.03 (-15.26 - -2.81) |
| Democratic Republic of the Congo | High fasting plasma glucose | 8.01 (0.52 - 15.49) |
| Democratic Republic of the Congo | Low physical activity | 2.72 (0.56 - 4.88) |
| Democratic Republic of the Congo | Secondhand smoke | 2.52 (0.54 - 4.51) |
| Democratic Republic of the Congo | Smoking | 0.76 (0.36 - 1.15) |
| Democratic Socialist Republic of Sri Lanka | Alcohol use | 0.39 (0.21 - 0.58) |
| Democratic Socialist Republic of Sri Lanka | Diet high in red meat | 8.41 (2.43 - 14.38) |
| Democratic Socialist Republic of Sri Lanka | High body-mass index | 0.00 (0.00 - 0.00) |
| Democratic Socialist Republic of Sri Lanka | High fasting plasma glucose | 3.53 (0.29 - 6.77) |
| Democratic Socialist Republic of Sri Lanka | Low physical activity | 1.44 (0.20 - 2.67) |
| Democratic Socialist Republic of Sri Lanka | Secondhand smoke | 2.45 (0.54 - 4.36) |
| Democratic Socialist Republic of Sri Lanka | Smoking | 0.44 (0.23 - 0.65) |
| Dominican Republic | Alcohol use | 9.10 (6.17 - 12.04) |
| Dominican Republic | Diet high in red meat | 29.07 (10.49 - 47.65) |
| Dominican Republic | High body-mass index | -14.58 (-24.21 - -4.95) |
| Dominican Republic | High fasting plasma glucose | 5.14 (0.72 - 9.55) |
| Dominican Republic | Low physical activity | 3.38 (0.97 - 5.79) |
| Dominican Republic | Secondhand smoke | 1.32 (0.32 - 2.32) |
| Dominican Republic | Smoking | 4.10 (2.59 - 5.62) |
| Eastern Republic of Uruguay | Alcohol use | 23.42 (17.92 - 28.92) |
| Eastern Republic of Uruguay | Diet high in red meat | 45.65 (18.40 - 72.90) |
| Eastern Republic of Uruguay | High body-mass index | -20.02 (-32.51 - -7.53) |
| Eastern Republic of Uruguay | High fasting plasma glucose | 5.76 (0.91 - 10.60) |
| Eastern Republic of Uruguay | Low physical activity | 5.11 (1.70 - 8.53) |
| Eastern Republic of Uruguay | Secondhand smoke | 3.55 (1.00 - 6.11) |
| Eastern Republic of Uruguay | Smoking | 14.28 (11.24 - 17.32) |
| Federal Democratic Republic of Ethiopia | Alcohol use | 8.02 (4.86 - 11.18) |
| Federal Democratic Republic of Ethiopia | Diet high in red meat | 30.47 (12.85 - 48.09) |
| Federal Democratic Republic of Ethiopia | High body-mass index | -7.67 (-12.20 - -3.14) |
| Federal Democratic Republic of Ethiopia | High fasting plasma glucose | 2.93 (0.62 - 5.23) |
| Federal Democratic Republic of Ethiopia | Low physical activity | 2.77 (1.00 - 4.53) |
| Federal Democratic Republic of Ethiopia | Secondhand smoke | 1.88 (0.58 - 3.17) |
| Federal Democratic Republic of Ethiopia | Smoking | 0.51 (0.29 - 0.73) |
| Federal Democratic Republic of Nepal | Alcohol use | 2.95 (1.53 - 4.37) |
| Federal Democratic Republic of Nepal | Diet high in red meat | 19.95 (7.31 - 32.59) |
| Federal Democratic Republic of Nepal | High body-mass index | -6.51 (-11.16 - -1.86) |
| Federal Democratic Republic of Nepal | High fasting plasma glucose | 3.29 (0.38 - 6.20) |
| Federal Democratic Republic of Nepal | Low physical activity | 1.21 (0.24 - 2.17) |
| Federal Democratic Republic of Nepal | Secondhand smoke | 1.72 (0.48 - 2.96) |
| Federal Democratic Republic of Nepal | Smoking | 1.63 (0.98 - 2.27) |
| Federal Republic of Germany | Alcohol use | 26.41 (21.32 - 31.50) |
| Federal Republic of Germany | Diet high in red meat | 28.07 (11.55 - 44.58) |
| Federal Republic of Germany | High body-mass index | -11.14 (-18.14 - -4.13) |
| Federal Republic of Germany | High fasting plasma glucose | 3.78 (0.69 - 6.86) |
| Federal Republic of Germany | Low physical activity | 2.52 (0.72 - 4.32) |
| Federal Republic of Germany | Secondhand smoke | 2.00 (0.53 - 3.48) |
| Federal Republic of Germany | Smoking | 10.28 (8.14 - 12.41) |
| Federal Republic of Nigeria | Alcohol use | 9.71 (5.64 - 13.77) |
| Federal Republic of Nigeria | Diet high in red meat | 37.68 (13.16 - 62.21) |
| Federal Republic of Nigeria | High body-mass index | -16.39 (-27.29 - -5.49) |
| Federal Republic of Nigeria | High fasting plasma glucose | 5.00 (0.63 - 9.36) |
| Federal Republic of Nigeria | Low physical activity | 4.38 (1.24 - 7.51) |
| Federal Republic of Nigeria | Secondhand smoke | 1.59 (0.32 - 2.86) |
| Federal Republic of Nigeria | Smoking | 0.46 (0.22 - 0.69) |
| Federal Republic of Somalia | Alcohol use | 0.00 (0.00 - 0.00) |
| Federal Republic of Somalia | Diet high in red meat | 24.89 (7.95 - 41.82) |
| Federal Republic of Somalia | High body-mass index | -9.58 (-16.46 - -2.70) |
| Federal Republic of Somalia | High fasting plasma glucose | 1.88 (0.11 - 3.65) |
| Federal Republic of Somalia | Low physical activity | 1.46 (0.08 - 2.85) |
| Federal Republic of Somalia | Secondhand smoke | 2.05 (0.47 - 3.63) |
| Federal Republic of Somalia | Smoking | 0.58 (0.23 - 0.92) |
| Federated States of Micronesia | Alcohol use | 4.37 (2.00 - 6.75) |
| Federated States of Micronesia | Diet high in red meat | 71.59 (24.48 - 118.71) |
| Federated States of Micronesia | High body-mass index | 0.00 (0.00 - 0.00) |
| Federated States of Micronesia | High fasting plasma glucose | 22.99 (1.32 - 44.66) |
| Federated States of Micronesia | Low physical activity | 21.50 (9.90 - 33.09) |
| Federated States of Micronesia | Secondhand smoke | 12.73 (3.44 - 22.01) |
| Federated States of Micronesia | Smoking | 20.86 (12.78 - 28.94) |
| Federative Republic of Brazil | Alcohol use | 11.59 (9.07 - 14.11) |
| Federative Republic of Brazil | Diet high in red meat | 36.32 (15.51 - 57.13) |
| Federative Republic of Brazil | High body-mass index | -16.75 (-26.75 - -6.75) |
| Federative Republic of Brazil | High fasting plasma glucose | 7.21 (1.69 - 12.73) |
| Federative Republic of Brazil | Low physical activity | 5.10 (2.17 - 8.03) |
| Federative Republic of Brazil | Secondhand smoke | 2.00 (0.61 - 3.39) |
| Federative Republic of Brazil | Smoking | 5.75 (4.57 - 6.92) |
| French Republic | Alcohol use | 22.94 (18.06 - 27.83) |
| French Republic | Diet high in red meat | 28.47 (11.20 - 45.74) |
| French Republic | High body-mass index | -10.68 (-17.21 - -4.15) |
| French Republic | High fasting plasma glucose | 3.88 (0.57 - 7.19) |
| French Republic | Low physical activity | 4.10 (1.61 - 6.59) |
| French Republic | Secondhand smoke | 2.34 (0.63 - 4.06) |
| French Republic | Smoking | 12.13 (9.59 - 14.66) |
| Gabonese Republic | Alcohol use | 16.01 (8.35 - 23.67) |
| Gabonese Republic | Diet high in red meat | 46.32 (14.73 - 77.90) |
| Gabonese Republic | High body-mass index | -25.84 (-44.50 - -7.18) |
| Gabonese Republic | High fasting plasma glucose | 17.52 (2.83 - 32.20) |
| Gabonese Republic | Low physical activity | 2.43 (0.36 - 4.49) |
| Gabonese Republic | Secondhand smoke | 3.81 (0.85 - 6.76) |
| Gabonese Republic | Smoking | 1.45 (0.66 - 2.23) |
| Georgia | Alcohol use | 7.37 (4.25 - 10.49) |
| Georgia | Diet high in red meat | 40.77 (15.45 - 66.09) |
| Georgia | High body-mass index | -18.74 (-31.37 - -6.10) |
| Georgia | High fasting plasma glucose | 4.15 (0.34 - 7.96) |
| Georgia | Low physical activity | 2.75 (0.73 - 4.76) |
| Georgia | Secondhand smoke | 6.89 (1.97 - 11.80) |
| Georgia | Smoking | 4.00 (2.60 - 5.39) |
| Grand Duchy of Luxembourg | Alcohol use | 17.62 (13.85 - 21.40) |
| Grand Duchy of Luxembourg | Diet high in red meat | 21.90 (8.50 - 35.31) |
| Grand Duchy of Luxembourg | High body-mass index | -8.07 (-13.14 - -3.00) |
| Grand Duchy of Luxembourg | High fasting plasma glucose | 3.23 (0.62 - 5.84) |
| Grand Duchy of Luxembourg | Low physical activity | 2.44 (0.76 - 4.11) |
| Grand Duchy of Luxembourg | Secondhand smoke | 1.57 (0.39 - 2.74) |
| Grand Duchy of Luxembourg | Smoking | 6.00 (4.51 - 7.50) |
| Greenland | Alcohol use | 19.24 (12.09 - 26.38) |
| Greenland | Diet high in red meat | 32.51 (9.71 - 55.32) |
| Greenland | High body-mass index | -14.38 (-24.90 - -3.86) |
| Greenland | High fasting plasma glucose | 2.72 (0.21 - 5.22) |
| Greenland | Low physical activity | 2.98 (0.41 - 5.54) |
| Greenland | Secondhand smoke | 3.86 (0.74 - 6.98) |
| Greenland | Smoking | 18.68 (11.60 - 25.77) |
| Grenada | Alcohol use | 14.12 (9.91 - 18.34) |
| Grenada | Diet high in red meat | 49.59 (20.36 - 78.82) |
| Grenada | High body-mass index | -27.80 (-44.97 - -10.64) |
| Grenada | High fasting plasma glucose | 12.79 (2.39 - 23.18) |
| Grenada | Low physical activity | 7.46 (3.04 - 11.88) |
| Grenada | Secondhand smoke | 2.74 (0.73 - 4.75) |
| Grenada | Smoking | 4.10 (2.54 - 5.67) |
| Guam | Alcohol use | 4.83 (1.54 - 8.12) |
| Guam | Diet high in red meat | 39.42 (15.56 - 63.29) |
| Guam | High body-mass index | 0.00 (0.00 - 0.00) |
| Guam | High fasting plasma glucose | 14.75 (2.80 - 26.71) |
| Guam | Low physical activity | 3.77 (1.35 - 6.18) |
| Guam | Secondhand smoke | 3.41 (0.79 - 6.03) |
| Guam | Smoking | 9.08 (6.43 - 11.73) |
| Hashemite Kingdom of Jordan | Alcohol use | 0.08 (0.04 - 0.12) |
| Hashemite Kingdom of Jordan | Diet high in red meat | 29.61 (10.38 - 48.84) |
| Hashemite Kingdom of Jordan | High body-mass index | -18.73 (-31.78 - -5.68) |
| Hashemite Kingdom of Jordan | High fasting plasma glucose | 9.18 (0.36 - 17.99) |
| Hashemite Kingdom of Jordan | Low physical activity | 4.05 (1.39 - 6.70) |
| Hashemite Kingdom of Jordan | Secondhand smoke | 4.70 (1.11 - 8.30) |
| Hashemite Kingdom of Jordan | Smoking | 3.17 (1.89 - 4.46) |
| Hellenic Republic | Alcohol use | 18.86 (14.17 - 23.56) |
| Hellenic Republic | Diet high in red meat | 29.46 (11.44 - 47.48) |
| Hellenic Republic | High body-mass index | -13.29 (-22.02 - -4.56) |
| Hellenic Republic | High fasting plasma glucose | 3.94 (0.62 - 7.26) |
| Hellenic Republic | Low physical activity | 2.55 (0.66 - 4.44) |
| Hellenic Republic | Secondhand smoke | 2.51 (0.62 - 4.41) |
| Hellenic Republic | Smoking | 14.24 (11.22 - 17.27) |
| Hungary | Alcohol use | 13.33 (9.80 - 16.86) |
| Hungary | Diet high in red meat | 27.12 (11.01 - 43.22) |
| Hungary | High body-mass index | -12.14 (-19.92 - -4.35) |
| Hungary | High fasting plasma glucose | 3.42 (0.33 - 6.51) |
| Hungary | Low physical activity | 2.41 (0.81 - 4.01) |
| Hungary | Secondhand smoke | 2.37 (0.63 - 4.12) |
| Hungary | Smoking | 9.11 (6.91 - 11.30) |
| Independent State of Papua New Guinea | Alcohol use | 1.44 (0.77 - 2.12) |
| Independent State of Papua New Guinea | Diet high in red meat | 50.57 (18.11 - 83.03) |
| Independent State of Papua New Guinea | High body-mass index | 0.00 (0.00 - 0.00) |
| Independent State of Papua New Guinea | High fasting plasma glucose | 9.79 (1.76 - 17.82) |
| Independent State of Papua New Guinea | Low physical activity | 9.14 (3.44 - 14.84) |
| Independent State of Papua New Guinea | Secondhand smoke | 8.07 (2.20 - 13.93) |
| Independent State of Papua New Guinea | Smoking | 8.91 (5.67 - 12.15) |
| Independent State of Samoa | Alcohol use | 1.12 (0.50 - 1.74) |
| Independent State of Samoa | Diet high in red meat | 43.25 (13.15 - 73.36) |
| Independent State of Samoa | High body-mass index | 0.00 (0.00 - 0.00) |
| Independent State of Samoa | High fasting plasma glucose | 15.69 (0.43 - 30.94) |
| Independent State of Samoa | Low physical activity | 12.96 (5.56 - 20.35) |
| Independent State of Samoa | Secondhand smoke | 5.60 (1.05 - 10.15) |
| Independent State of Samoa | Smoking | 7.65 (4.47 - 10.82) |
| Ireland | Alcohol use | 24.04 (19.07 - 29.00) |
| Ireland | Diet high in red meat | 26.82 (9.81 - 43.84) |
| Ireland | High body-mass index | -12.29 (-20.43 - -4.16) |
| Ireland | High fasting plasma glucose | 4.74 (0.47 - 9.00) |
| Ireland | Low physical activity | 4.02 (1.54 - 6.50) |
| Ireland | Secondhand smoke | 1.55 (0.36 - 2.74) |
| Ireland | Smoking | 7.22 (5.51 - 8.92) |
| Islamic Republic of Afghanistan | Alcohol use | 0.05 (0.00 - 0.09) |
| Islamic Republic of Afghanistan | Diet high in red meat | 36.59 (5.30 - 67.89) |
| Islamic Republic of Afghanistan | High body-mass index | -13.49 (-24.47 - -2.51) |
| Islamic Republic of Afghanistan | High fasting plasma glucose | 10.77 (-1.18 - 22.71) |
| Islamic Republic of Afghanistan | Low physical activity | 6.53 (1.26 - 11.79) |
| Islamic Republic of Afghanistan | Secondhand smoke | 3.19 (0.17 - 6.21) |
| Islamic Republic of Afghanistan | Smoking | 1.95 (0.61 - 3.29) |
| Islamic Republic of Iran | Alcohol use | 0.20 (0.12 - 0.29) |
| Islamic Republic of Iran | Diet high in red meat | 23.09 (10.14 - 36.04) |
| Islamic Republic of Iran | High body-mass index | -13.65 (-21.79 - -5.52) |
| Islamic Republic of Iran | High fasting plasma glucose | 4.75 (0.87 - 8.63) |
| Islamic Republic of Iran | Low physical activity | 4.40 (2.20 - 6.61) |
| Islamic Republic of Iran | Secondhand smoke | 2.49 (0.80 - 4.17) |
| Islamic Republic of Iran | Smoking | 1.24 (0.78 - 1.70) |
| Islamic Republic of Mauritania | Alcohol use | 0.00 (0.00 - 0.00) |
| Islamic Republic of Mauritania | Diet high in red meat | 28.71 (9.72 - 47.69) |
| Islamic Republic of Mauritania | High body-mass index | -14.89 (-25.31 - -4.47) |
| Islamic Republic of Mauritania | High fasting plasma glucose | 3.73 (0.40 - 7.07) |
| Islamic Republic of Mauritania | Low physical activity | 5.02 (1.86 - 8.18) |
| Islamic Republic of Mauritania | Secondhand smoke | 3.17 (0.70 - 5.64) |
| Islamic Republic of Mauritania | Smoking | 1.61 (0.78 - 2.44) |
| Islamic Republic of Pakistan | Alcohol use | 1.40 (0.71 - 2.10) |
| Islamic Republic of Pakistan | Diet high in red meat | 57.45 (22.57 - 92.33) |
| Islamic Republic of Pakistan | High body-mass index | -24.97 (-40.14 - -9.79) |
| Islamic Republic of Pakistan | High fasting plasma glucose | 13.40 (2.46 - 24.35) |
| Islamic Republic of Pakistan | Low physical activity | 4.58 (1.20 - 7.97) |
| Islamic Republic of Pakistan | Secondhand smoke | 5.69 (1.64 - 9.75) |
| Islamic Republic of Pakistan | Smoking | 1.59 (0.78 - 2.40) |
| Jamaica | Alcohol use | 9.65 (5.90 - 13.40) |
| Jamaica | Diet high in red meat | 56.94 (21.06 - 92.83) |
| Jamaica | High body-mass index | -32.32 (-53.14 - -11.51) |
| Jamaica | High fasting plasma glucose | 6.14 (0.74 - 11.53) |
| Jamaica | Low physical activity | 13.97 (6.47 - 21.47) |
| Jamaica | Secondhand smoke | 3.51 (0.78 - 6.24) |
| Jamaica | Smoking | 6.14 (3.84 - 8.44) |
| Japan | Alcohol use | 16.67 (13.52 - 19.83) |
| Japan | Diet high in red meat | 20.63 (8.23 - 33.02) |
| Japan | High body-mass index | 0.00 (0.00 - 0.00) |
| Japan | High fasting plasma glucose | 3.15 (0.55 - 5.75) |
| Japan | Low physical activity | 4.03 (1.80 - 6.25) |
| Japan | Secondhand smoke | 1.73 (0.45 - 3.00) |
| Japan | Smoking | 3.36 (2.38 - 4.34) |
| Kingdom of Bahrain | Alcohol use | 0.32 (0.17 - 0.46) |
| Kingdom of Bahrain | Diet high in red meat | 39.09 (15.03 - 63.15) |
| Kingdom of Bahrain | High body-mass index | -24.77 (-40.73 - -8.81) |
| Kingdom of Bahrain | High fasting plasma glucose | 11.46 (1.68 - 21.25) |
| Kingdom of Bahrain | Low physical activity | 7.51 (3.16 - 11.87) |
| Kingdom of Bahrain | Secondhand smoke | 3.52 (0.93 - 6.12) |
| Kingdom of Bahrain | Smoking | 2.15 (1.06 - 3.24) |
| Kingdom of Belgium | Alcohol use | 21.44 (16.96 - 25.93) |
| Kingdom of Belgium | Diet high in red meat | 25.99 (10.20 - 41.78) |
| Kingdom of Belgium | High body-mass index | -10.18 (-16.61 - -3.76) |
| Kingdom of Belgium | High fasting plasma glucose | 3.88 (0.61 - 7.15) |
| Kingdom of Belgium | Low physical activity | 3.43 (1.19 - 5.68) |
| Kingdom of Belgium | Secondhand smoke | 1.59 (0.42 - 2.77) |
| Kingdom of Belgium | Smoking | 9.62 (7.54 - 11.71) |
| Kingdom of Bhutan | Alcohol use | 1.12 (0.46 - 1.78) |
| Kingdom of Bhutan | Diet high in red meat | 14.75 (5.06 - 24.44) |
| Kingdom of Bhutan | High body-mass index | -8.91 (-14.91 - -2.92) |
| Kingdom of Bhutan | High fasting plasma glucose | 2.62 (0.31 - 4.93) |
| Kingdom of Bhutan | Low physical activity | 5.12 (2.48 - 7.77) |
| Kingdom of Bhutan | Secondhand smoke | 1.07 (0.24 - 1.89) |
| Kingdom of Bhutan | Smoking | 0.93 (0.46 - 1.40) |
| Kingdom of Cambodia | Alcohol use | 13.77 (8.68 - 18.86) |
| Kingdom of Cambodia | Diet high in red meat | 43.28 (14.96 - 71.60) |
| Kingdom of Cambodia | High body-mass index | 0.00 (0.00 - 0.00) |
| Kingdom of Cambodia | High fasting plasma glucose | 3.07 (0.16 - 5.97) |
| Kingdom of Cambodia | Low physical activity | 1.30 (-0.05 - 2.64) |
| Kingdom of Cambodia | Secondhand smoke | 6.61 (1.72 - 11.50) |
| Kingdom of Cambodia | Smoking | 2.18 (1.17 - 3.18) |
| Kingdom of Denmark | Alcohol use | 18.24 (14.49 - 22.00) |
| Kingdom of Denmark | Diet high in red meat | 22.37 (9.24 - 35.51) |
| Kingdom of Denmark | High body-mass index | -8.43 (-13.60 - -3.25) |
| Kingdom of Denmark | High fasting plasma glucose | 2.68 (0.48 - 4.88) |
| Kingdom of Denmark | Low physical activity | 2.50 (0.89 - 4.12) |
| Kingdom of Denmark | Secondhand smoke | 1.19 (0.31 - 2.08) |
| Kingdom of Denmark | Smoking | 8.57 (6.66 - 10.49) |
| Kingdom of Eswatini | Alcohol use | 6.29 (3.31 - 9.27) |
| Kingdom of Eswatini | Diet high in red meat | 45.88 (13.26 - 78.50) |
| Kingdom of Eswatini | High body-mass index | -26.54 (-46.22 - -6.86) |
| Kingdom of Eswatini | High fasting plasma glucose | 5.55 (0.02 - 11.07) |
| Kingdom of Eswatini | Low physical activity | 5.70 (1.53 - 9.87) |
| Kingdom of Eswatini | Secondhand smoke | 3.26 (0.54 - 5.97) |
| Kingdom of Eswatini | Smoking | 0.70 (0.25 - 1.16) |
| Kingdom of Lesotho | Alcohol use | 11.18 (5.68 - 16.67) |
| Kingdom of Lesotho | Diet high in red meat | 45.24 (13.29 - 77.18) |
| Kingdom of Lesotho | High body-mass index | -22.11 (-39.31 - -4.91) |
| Kingdom of Lesotho | High fasting plasma glucose | 4.62 (-0.11 - 9.35) |
| Kingdom of Lesotho | Low physical activity | 1.51 (0.11 - 2.91) |
| Kingdom of Lesotho | Secondhand smoke | 6.90 (1.29 - 12.51) |
| Kingdom of Lesotho | Smoking | 0.56 (0.28 - 0.84) |
| Kingdom of Morocco | Alcohol use | 0.01 (0.00 - 0.02) |
| Kingdom of Morocco | Diet high in red meat | 24.78 (7.26 - 42.29) |
| Kingdom of Morocco | High body-mass index | -13.85 (-23.84 - -3.87) |
| Kingdom of Morocco | High fasting plasma glucose | 9.42 (1.20 - 17.65) |
| Kingdom of Morocco | Low physical activity | 4.63 (1.71 - 7.55) |
| Kingdom of Morocco | Secondhand smoke | 2.55 (0.56 - 4.53) |
| Kingdom of Morocco | Smoking | 0.28 (0.13 - 0.42) |
| Kingdom of Norway | Alcohol use | 13.70 (10.65 - 16.74) |
| Kingdom of Norway | Diet high in red meat | 18.38 (7.13 - 29.64) |
| Kingdom of Norway | High body-mass index | -7.69 (-12.62 - -2.77) |
| Kingdom of Norway | High fasting plasma glucose | 3.10 (0.49 - 5.71) |
| Kingdom of Norway | Low physical activity | 2.18 (0.72 - 3.64) |
| Kingdom of Norway | Secondhand smoke | 0.96 (0.22 - 1.70) |
| Kingdom of Norway | Smoking | 6.06 (4.50 - 7.63) |
| Kingdom of Saudi Arabia | Alcohol use | 0.02 (0.01 - 0.04) |
| Kingdom of Saudi Arabia | Diet high in red meat | 27.53 (9.74 - 45.32) |
| Kingdom of Saudi Arabia | High body-mass index | -17.95 (-29.94 - -5.96) |
| Kingdom of Saudi Arabia | High fasting plasma glucose | 10.34 (1.32 - 19.35) |
| Kingdom of Saudi Arabia | Low physical activity | 5.32 (2.15 - 8.49) |
| Kingdom of Saudi Arabia | Secondhand smoke | 2.83 (0.53 - 5.14) |
| Kingdom of Saudi Arabia | Smoking | 0.81 (0.40 - 1.23) |
| Kingdom of Spain | Alcohol use | 17.22 (13.56 - 20.88) |
| Kingdom of Spain | Diet high in red meat | 22.74 (9.24 - 36.23) |
| Kingdom of Spain | High body-mass index | -9.26 (-15.18 - -3.34) |
| Kingdom of Spain | High fasting plasma glucose | 3.53 (0.55 - 6.51) |
| Kingdom of Spain | Low physical activity | 2.83 (0.93 - 4.73) |
| Kingdom of Spain | Secondhand smoke | 1.63 (0.41 - 2.86) |
| Kingdom of Spain | Smoking | 8.90 (7.01 - 10.79) |
| Kingdom of Sweden | Alcohol use | 13.79 (10.65 - 16.93) |
| Kingdom of Sweden | Diet high in red meat | 16.61 (6.51 - 26.70) |
| Kingdom of Sweden | High body-mass index | -6.62 (-10.85 - -2.39) |
| Kingdom of Sweden | High fasting plasma glucose | 2.86 (0.36 - 5.35) |
| Kingdom of Sweden | Low physical activity | 2.06 (0.81 - 3.30) |
| Kingdom of Sweden | Secondhand smoke | 0.72 (0.16 - 1.28) |
| Kingdom of Sweden | Smoking | 5.09 (3.84 - 6.33) |
| Kingdom of Thailand | Alcohol use | 3.69 (2.22 - 5.17) |
| Kingdom of Thailand | Diet high in red meat | 40.34 (16.27 - 64.42) |
| Kingdom of Thailand | High body-mass index | 0.00 (0.00 - 0.00) |
| Kingdom of Thailand | High fasting plasma glucose | 5.01 (0.72 - 9.30) |
| Kingdom of Thailand | Low physical activity | 3.09 (0.76 - 5.43) |
| Kingdom of Thailand | Secondhand smoke | 4.96 (1.54 - 8.38) |
| Kingdom of Thailand | Smoking | 1.22 (0.69 - 1.76) |
| Kingdom of Tonga | Alcohol use | 2.43 (0.99 - 3.88) |
| Kingdom of Tonga | Diet high in red meat | 72.68 (25.87 - 119.50) |
| Kingdom of Tonga | High body-mass index | 0.00 (0.00 - 0.00) |
| Kingdom of Tonga | High fasting plasma glucose | 25.82 (3.60 - 48.04) |
| Kingdom of Tonga | Low physical activity | 15.74 (6.78 - 24.70) |
| Kingdom of Tonga | Secondhand smoke | 10.26 (2.72 - 17.80) |
| Kingdom of Tonga | Smoking | 7.85 (4.87 - 10.82) |
| Kingdom of the Netherlands | Alcohol use | 21.10 (16.49 - 25.71) |
| Kingdom of the Netherlands | Diet high in red meat | 28.33 (11.94 - 44.72) |
| Kingdom of the Netherlands | High body-mass index | -11.99 (-19.44 - -4.53) |
| Kingdom of the Netherlands | High fasting plasma glucose | 4.10 (0.73 - 7.47) |
| Kingdom of the Netherlands | Low physical activity | 2.23 (0.55 - 3.91) |
| Kingdom of the Netherlands | Secondhand smoke | 1.81 (0.49 - 3.13) |
| Kingdom of the Netherlands | Smoking | 9.30 (7.30 - 11.30) |
| Kyrgyz Republic | Alcohol use | 3.87 (2.48 - 5.26) |
| Kyrgyz Republic | Diet high in red meat | 23.87 (9.59 - 38.16) |
| Kyrgyz Republic | High body-mass index | -12.07 (-19.32 - -4.83) |
| Kyrgyz Republic | High fasting plasma glucose | 2.97 (0.50 - 5.44) |
| Kyrgyz Republic | Low physical activity | 1.41 (0.30 - 2.53) |
| Kyrgyz Republic | Secondhand smoke | 3.86 (1.14 - 6.59) |
| Kyrgyz Republic | Smoking | 1.71 (1.09 - 2.32) |
| Lao People's Democratic Republic | Alcohol use | 15.40 (10.12 - 20.67) |
| Lao People's Democratic Republic | Diet high in red meat | 40.24 (14.66 - 65.83) |
| Lao People's Democratic Republic | High body-mass index | 0.00 (0.00 - 0.00) |
| Lao People's Democratic Republic | High fasting plasma glucose | 4.82 (0.46 - 9.18) |
| Lao People's Democratic Republic | Low physical activity | 1.98 (0.09 - 3.87) |
| Lao People's Democratic Republic | Secondhand smoke | 6.83 (1.82 - 11.85) |
| Lao People's Democratic Republic | Smoking | 2.83 (1.61 - 4.06) |
| Lebanese Republic | Alcohol use | 1.17 (0.59 - 1.75) |
| Lebanese Republic | Diet high in red meat | 34.59 (12.35 - 56.83) |
| Lebanese Republic | High body-mass index | -18.84 (-30.99 - -6.70) |
| Lebanese Republic | High fasting plasma glucose | 7.60 (0.58 - 14.61) |
| Lebanese Republic | Low physical activity | 4.67 (1.76 - 7.58) |
| Lebanese Republic | Secondhand smoke | 4.39 (1.07 - 7.72) |
| Lebanese Republic | Smoking | 12.08 (8.43 - 15.74) |
| Malaysia | Alcohol use | 2.68 (1.37 - 3.99) |
| Malaysia | Diet high in red meat | 54.42 (18.54 - 90.30) |
| Malaysia | High body-mass index | 0.00 (0.00 - 0.00) |
| Malaysia | High fasting plasma glucose | 14.35 (1.77 - 26.93) |
| Malaysia | Low physical activity | 7.78 (2.58 - 12.98) |
| Malaysia | Secondhand smoke | 8.10 (1.84 - 14.35) |
| Malaysia | Smoking | 1.24 (0.71 - 1.78) |
| Mongolia | Alcohol use | 4.83 (3.31 - 6.35) |
| Mongolia | Diet high in red meat | 13.33 (5.19 - 21.48) |
| Mongolia | High body-mass index | -6.17 (-10.17 - -2.17) |
| Mongolia | High fasting plasma glucose | 1.74 (0.27 - 3.20) |
| Mongolia | Low physical activity | 0.58 (0.11 - 1.05) |
| Mongolia | Secondhand smoke | 2.23 (0.63 - 3.84) |
| Mongolia | Smoking | 0.87 (0.54 - 1.19) |
| Montenegro | Alcohol use | 11.46 (7.60 - 15.32) |
| Montenegro | Diet high in red meat | 35.67 (13.18 - 58.17) |
| Montenegro | High body-mass index | -16.13 (-27.07 - -5.19) |
| Montenegro | High fasting plasma glucose | 6.56 (0.12 - 12.99) |
| Montenegro | Low physical activity | 3.20 (0.81 - 5.59) |
| Montenegro | Secondhand smoke | 3.06 (0.79 - 5.34) |
| Montenegro | Smoking | 20.65 (15.55 - 25.76) |
| New Zealand | Alcohol use | 32.19 (26.75 - 37.62) |
| New Zealand | Diet high in red meat | 33.46 (13.51 - 53.41) |
| New Zealand | High body-mass index | -16.08 (-26.24 - -5.92) |
| New Zealand | High fasting plasma glucose | 7.32 (0.84 - 13.81) |
| New Zealand | Low physical activity | 4.65 (1.74 - 7.57) |
| New Zealand | Secondhand smoke | 2.36 (0.59 - 4.13) |
| New Zealand | Smoking | 10.68 (8.56 - 12.80) |
| North Macedonia | Alcohol use | 7.95 (4.77 - 11.12) |
| North Macedonia | Diet high in red meat | 32.73 (10.93 - 54.52) |
| North Macedonia | High body-mass index | -15.79 (-26.21 - -5.37) |
| North Macedonia | High fasting plasma glucose | 5.44 (-0.06 - 10.93) |
| North Macedonia | Low physical activity | 2.84 (0.56 - 5.12) |
| North Macedonia | Secondhand smoke | 4.07 (1.03 - 7.10) |
| North Macedonia | Smoking | 16.01 (11.43 - 20.60) |
| Northern Mariana Islands | Alcohol use | 4.66 (1.38 - 7.93) |
| Northern Mariana Islands | Diet high in red meat | 51.92 (19.66 - 84.19) |
| Northern Mariana Islands | High body-mass index | 0.00 (0.00 - 0.00) |
| Northern Mariana Islands | High fasting plasma glucose | 19.61 (3.50 - 35.72) |
| Northern Mariana Islands | Low physical activity | 9.45 (4.04 - 14.86) |
| Northern Mariana Islands | Secondhand smoke | 6.15 (1.57 - 10.74) |
| Northern Mariana Islands | Smoking | 8.39 (4.65 - 12.13) |
| Palestine | Alcohol use | 0.41 (0.24 - 0.57) |
| Palestine | Diet high in red meat | 33.72 (13.11 - 54.33) |
| Palestine | High body-mass index | -23.13 (-37.71 - -8.55) |
| Palestine | High fasting plasma glucose | 7.45 (1.28 - 13.63) |
| Palestine | Low physical activity | 9.11 (4.62 - 13.61) |
| Palestine | Secondhand smoke | 5.72 (1.72 - 9.73) |
| Palestine | Smoking | 1.40 (0.74 - 2.05) |
| People's Democratic Republic of Algeria | Alcohol use | 0.15 (0.08 - 0.22) |
| People's Democratic Republic of Algeria | Diet high in red meat | 17.85 (6.00 - 29.71) |
| People's Democratic Republic of Algeria | High body-mass index | -9.45 (-15.76 - -3.13) |
| People's Democratic Republic of Algeria | High fasting plasma glucose | 4.82 (0.64 - 9.01) |
| People's Democratic Republic of Algeria | Low physical activity | 3.39 (1.38 - 5.40) |
| People's Democratic Republic of Algeria | Secondhand smoke | 2.47 (0.64 - 4.29) |
| People's Democratic Republic of Algeria | Smoking | 0.28 (0.15 - 0.42) |
| People's Republic of Bangladesh | Alcohol use | 0.12 (0.04 - 0.20) |
| People's Republic of Bangladesh | Diet high in red meat | 12.40 (4.05 - 20.75) |
| People's Republic of Bangladesh | High body-mass index | -7.52 (-12.26 - -2.77) |
| People's Republic of Bangladesh | High fasting plasma glucose | 5.96 (0.76 - 11.15) |
| People's Republic of Bangladesh | Low physical activity | 2.53 (0.80 - 4.27) |
| People's Republic of Bangladesh | Secondhand smoke | 3.81 (1.03 - 6.59) |
| People's Republic of Bangladesh | Smoking | 0.46 (0.22 - 0.70) |
| People's Republic of China | Alcohol use | 1.64 (1.01 - 2.27) |
| People's Republic of China | Diet high in red meat | 19.50 (7.75 - 31.24) |
| People's Republic of China | High body-mass index | 0.00 (0.00 - 0.00) |
| People's Republic of China | High fasting plasma glucose | 3.49 (0.68 - 6.30) |
| People's Republic of China | Low physical activity | 1.78 (0.65 - 2.90) |
| People's Republic of China | Secondhand smoke | 3.62 (1.07 - 6.17) |
| People's Republic of China | Smoking | 0.67 (0.40 - 0.94) |
| Plurinational State of Bolivia | Alcohol use | 9.97 (6.07 - 13.87) |
| Plurinational State of Bolivia | Diet high in red meat | 31.93 (10.68 - 53.17) |
| Plurinational State of Bolivia | High body-mass index | -16.15 (-27.44 - -4.87) |
| Plurinational State of Bolivia | High fasting plasma glucose | 5.18 (0.05 - 10.31) |
| Plurinational State of Bolivia | Low physical activity | 2.45 (0.32 - 4.59) |
| Plurinational State of Bolivia | Secondhand smoke | 2.41 (0.49 - 4.34) |
| Plurinational State of Bolivia | Smoking | 1.62 (0.85 - 2.39) |
| Portuguese Republic | Alcohol use | 18.56 (14.25 - 22.88) |
| Portuguese Republic | Diet high in red meat | 28.58 (11.80 - 45.36) |
| Portuguese Republic | High body-mass index | -12.30 (-19.94 - -4.66) |
| Portuguese Republic | High fasting plasma glucose | 4.96 (0.88 - 9.04) |
| Portuguese Republic | Low physical activity | 3.56 (1.30 - 5.82) |
| Portuguese Republic | Secondhand smoke | 2.63 (0.76 - 4.50) |
| Portuguese Republic | Smoking | 9.64 (7.52 - 11.76) |
| Principality of Andorra | Alcohol use | 23.33 (15.97 - 30.68) |
| Principality of Andorra | Diet high in red meat | 29.11 (10.10 - 48.12) |
| Principality of Andorra | High body-mass index | -11.86 (-20.27 - -3.46) |
| Principality of Andorra | High fasting plasma glucose | 4.70 (0.48 - 8.92) |
| Principality of Andorra | Low physical activity | 3.61 (0.89 - 6.34) |
| Principality of Andorra | Secondhand smoke | 2.34 (0.43 - 4.24) |
| Principality of Andorra | Smoking | 11.07 (6.64 - 15.50) |
| Principality of Monaco | Alcohol use | 37.37 (17.07 - 57.66) |
| Principality of Monaco | Diet high in red meat | 62.64 (23.96 - 101.32) |
| Principality of Monaco | High body-mass index | -27.12 (-44.30 - -9.93) |
| Principality of Monaco | High fasting plasma glucose | 12.24 (1.70 - 22.78) |
| Principality of Monaco | Low physical activity | 7.59 (2.60 - 12.57) |
| Principality of Monaco | Secondhand smoke | 4.29 (1.02 - 7.56) |
| Principality of Monaco | Smoking | 23.44 (15.08 - 31.80) |
| Puerto Rico | Alcohol use | 7.17 (4.98 - 9.36) |
| Puerto Rico | Diet high in red meat | 27.88 (10.93 - 44.83) |
| Puerto Rico | High body-mass index | -14.75 (-24.17 - -5.33) |
| Puerto Rico | High fasting plasma glucose | 9.75 (1.69 - 17.80) |
| Puerto Rico | Low physical activity | 3.50 (1.36 - 5.63) |
| Puerto Rico | Secondhand smoke | 1.08 (0.27 - 1.89) |
| Puerto Rico | Smoking | 3.88 (2.76 - 4.99) |
| Republic of Albania | Alcohol use | 2.71 (1.61 - 3.80) |
| Republic of Albania | Diet high in red meat | 19.45 (7.75 - 31.14) |
| Republic of Albania | High body-mass index | -9.38 (-15.55 - -3.21) |
| Republic of Albania | High fasting plasma glucose | 2.37 (0.29 - 4.45) |
| Republic of Albania | Low physical activity | 1.64 (0.41 - 2.87) |
| Republic of Albania | Secondhand smoke | 3.01 (0.89 - 5.14) |
| Republic of Albania | Smoking | 2.10 (1.19 - 3.00) |
| Republic of Angola | Alcohol use | 10.42 (6.04 - 14.79) |
| Republic of Angola | Diet high in red meat | 36.83 (12.72 - 60.93) |
| Republic of Angola | High body-mass index | -11.96 (-20.63 - -3.29) |
| Republic of Angola | High fasting plasma glucose | 4.24 (0.34 - 8.13) |
| Republic of Angola | Low physical activity | 3.08 (0.65 - 5.51) |
| Republic of Angola | Secondhand smoke | 2.14 (0.47 - 3.81) |
| Republic of Angola | Smoking | 2.03 (1.05 - 3.00) |
| Republic of Armenia | Alcohol use | 2.81 (1.68 - 3.94) |
| Republic of Armenia | Diet high in red meat | 22.00 (9.19 - 34.81) |
| Republic of Armenia | High body-mass index | -10.97 (-18.14 - -3.79) |
| Republic of Armenia | High fasting plasma glucose | 2.67 (0.33 - 5.01) |
| Republic of Armenia | Low physical activity | 1.31 (0.24 - 2.38) |
| Republic of Armenia | Secondhand smoke | 4.02 (1.26 - 6.79) |
| Republic of Armenia | Smoking | 0.81 (0.48 - 1.15) |
| Republic of Austria | Alcohol use | 18.60 (14.95 - 22.26) |
| Republic of Austria | Diet high in red meat | 21.96 (8.99 - 34.93) |
| Republic of Austria | High body-mass index | -8.04 (-12.96 - -3.13) |
| Republic of Austria | High fasting plasma glucose | 2.40 (0.37 - 4.43) |
| Republic of Austria | Low physical activity | 2.51 (0.87 - 4.16) |
| Republic of Austria | Secondhand smoke | 2.15 (0.65 - 3.64) |
| Republic of Austria | Smoking | 9.36 (7.28 - 11.44) |
| Republic of Azerbaijan | Alcohol use | 4.14 (2.57 - 5.71) |
| Republic of Azerbaijan | Diet high in red meat | 28.78 (10.60 - 46.96) |
| Republic of Azerbaijan | High body-mass index | -15.72 (-25.79 - -5.65) |
| Republic of Azerbaijan | High fasting plasma glucose | 4.66 (0.41 - 8.90) |
| Republic of Azerbaijan | Low physical activity | 1.74 (0.28 - 3.19) |
| Republic of Azerbaijan | Secondhand smoke | 4.99 (1.42 - 8.56) |
| Republic of Azerbaijan | Smoking | 0.83 (0.44 - 1.22) |
| Republic of Belarus | Alcohol use | 17.74 (12.92 - 22.55) |
| Republic of Belarus | Diet high in red meat | 26.76 (9.78 - 43.74) |
| Republic of Belarus | High body-mass index | -12.64 (-21.59 - -3.69) |
| Republic of Belarus | High fasting plasma glucose | 2.36 (0.12 - 4.60) |
| Republic of Belarus | Low physical activity | 2.01 (0.51 - 3.51) |
| Republic of Belarus | Secondhand smoke | 3.50 (0.86 - 6.15) |
| Republic of Belarus | Smoking | 5.34 (3.77 - 6.91) |
| Republic of Benin | Alcohol use | 4.33 (2.33 - 6.33) |
| Republic of Benin | Diet high in red meat | 18.36 (5.89 - 30.83) |
| Republic of Benin | High body-mass index | -8.50 (-14.49 - -2.51) |
| Republic of Benin | High fasting plasma glucose | 2.42 (0.22 - 4.63) |
| Republic of Benin | Low physical activity | 0.65 (-0.00 - 1.30) |
| Republic of Benin | Secondhand smoke | 0.97 (0.25 - 1.69) |
| Republic of Benin | Smoking | 0.33 (0.17 - 0.49) |
| Republic of Botswana | Alcohol use | 6.69 (3.53 - 9.84) |
| Republic of Botswana | Diet high in red meat | 35.68 (10.78 - 60.57) |
| Republic of Botswana | High body-mass index | -12.93 (-21.78 - -4.07) |
| Republic of Botswana | High fasting plasma glucose | 3.68 (0.55 - 6.82) |
| Republic of Botswana | Low physical activity | 5.40 (1.86 - 8.94) |
| Republic of Botswana | Secondhand smoke | 3.61 (0.65 - 6.56) |
| Republic of Botswana | Smoking | 1.39 (0.68 - 2.10) |
| Republic of Bulgaria | Alcohol use | 25.64 (19.37 - 31.91) |
| Republic of Bulgaria | Diet high in red meat | 39.97 (15.30 - 64.64) |
| Republic of Bulgaria | High body-mass index | -15.78 (-25.99 - -5.57) |
| Republic of Bulgaria | High fasting plasma glucose | 5.71 (0.55 - 10.87) |
| Republic of Bulgaria | Low physical activity | 3.82 (1.11 - 6.54) |
| Republic of Bulgaria | Secondhand smoke | 3.82 (0.97 - 6.68) |
| Republic of Bulgaria | Smoking | 20.36 (15.54 - 25.17) |
| Republic of Burundi | Alcohol use | 5.03 (2.92 - 7.15) |
| Republic of Burundi | Diet high in red meat | 12.03 (3.51 - 20.56) |
| Republic of Burundi | High body-mass index | -5.65 (-9.36 - -1.94) |
| Republic of Burundi | High fasting plasma glucose | 2.02 (0.28 - 3.76) |
| Republic of Burundi | Low physical activity | 1.68 (0.29 - 3.08) |
| Republic of Burundi | Secondhand smoke | 1.68 (0.43 - 2.93) |
| Republic of Burundi | Smoking | 1.04 (0.53 - 1.54) |
| Republic of Cabo Verde | Alcohol use | 4.30 (2.39 - 6.21) |
| Republic of Cabo Verde | Diet high in red meat | 24.35 (9.01 - 39.68) |
| Republic of Cabo Verde | High body-mass index | -10.87 (-18.22 - -3.51) |
| Republic of Cabo Verde | High fasting plasma glucose | 5.50 (0.99 - 10.02) |
| Republic of Cabo Verde | Low physical activity | 2.09 (0.53 - 3.65) |
| Republic of Cabo Verde | Secondhand smoke | 1.49 (0.34 - 2.63) |
| Republic of Cabo Verde | Smoking | 0.80 (0.43 - 1.16) |
| Republic of Cameroon | Alcohol use | 14.44 (8.93 - 19.95) |
| Republic of Cameroon | Diet high in red meat | 31.82 (11.01 - 52.63) |
| Republic of Cameroon | High body-mass index | -15.60 (-26.36 - -4.84) |
| Republic of Cameroon | High fasting plasma glucose | 5.04 (0.76 - 9.32) |
| Republic of Cameroon | Low physical activity | 3.03 (0.74 - 5.32) |
| Republic of Cameroon | Secondhand smoke | 1.84 (0.47 - 3.21) |
| Republic of Cameroon | Smoking | 0.37 (0.21 - 0.53) |
| Republic of Chad | Alcohol use | 5.94 (2.44 - 9.44) |
| Republic of Chad | Diet high in red meat | 22.34 (7.86 - 36.81) |
| Republic of Chad | High body-mass index | -5.27 (-8.88 - -1.65) |
| Republic of Chad | High fasting plasma glucose | 2.78 (0.28 - 5.29) |
| Republic of Chad | Low physical activity | 1.72 (0.23 - 3.21) |
| Republic of Chad | Secondhand smoke | 1.41 (0.34 - 2.48) |
| Republic of Chad | Smoking | 0.42 (0.18 - 0.66) |
| Republic of Chile | Alcohol use | 13.84 (11.08 - 16.60) |
| Republic of Chile | Diet high in red meat | 20.75 (8.56 - 32.94) |
| Republic of Chile | High body-mass index | -11.67 (-18.87 - -4.46) |
| Republic of Chile | High fasting plasma glucose | 3.96 (0.58 - 7.35) |
| Republic of Chile | Low physical activity | 2.13 (0.72 - 3.55) |
| Republic of Chile | Secondhand smoke | 1.72 (0.45 - 2.99) |
| Republic of Chile | Smoking | 9.52 (7.23 - 11.81) |
| Republic of Colombia | Alcohol use | 5.12 (3.44 - 6.81) |
| Republic of Colombia | Diet high in red meat | 29.97 (11.85 - 48.09) |
| Republic of Colombia | High body-mass index | -15.30 (-24.58 - -6.01) |
| Republic of Colombia | High fasting plasma glucose | 4.35 (0.61 - 8.10) |
| Republic of Colombia | Low physical activity | 6.37 (3.09 - 9.66) |
| Republic of Colombia | Secondhand smoke | 1.66 (0.46 - 2.86) |
| Republic of Colombia | Smoking | 3.24 (2.15 - 4.34) |
| Republic of Costa Rica | Alcohol use | 5.24 (3.27 - 7.21) |
| Republic of Costa Rica | Diet high in red meat | 30.66 (13.24 - 48.08) |
| Republic of Costa Rica | High body-mass index | -15.43 (-24.63 - -6.24) |
| Republic of Costa Rica | High fasting plasma glucose | 5.91 (1.11 - 10.71) |
| Republic of Costa Rica | Low physical activity | 2.81 (0.78 - 4.83) |
| Republic of Costa Rica | Secondhand smoke | 1.83 (0.51 - 3.15) |
| Republic of Costa Rica | Smoking | 3.20 (2.14 - 4.27) |
| Republic of Croatia | Alcohol use | 10.65 (7.41 - 13.90) |
| Republic of Croatia | Diet high in red meat | 23.70 (9.30 - 38.09) |
| Republic of Croatia | High body-mass index | -10.45 (-17.48 - -3.43) |
| Republic of Croatia | High fasting plasma glucose | 3.39 (0.36 - 6.43) |
| Republic of Croatia | Low physical activity | 2.10 (0.60 - 3.59) |
| Republic of Croatia | Secondhand smoke | 2.78 (0.78 - 4.77) |
| Republic of Croatia | Smoking | 10.93 (8.38 - 13.49) |
| Republic of Cuba | Alcohol use | 6.57 (4.24 - 8.89) |
| Republic of Cuba | Diet high in red meat | 25.89 (9.45 - 42.32) |
| Republic of Cuba | High body-mass index | -13.80 (-23.20 - -4.41) |
| Republic of Cuba | High fasting plasma glucose | 6.84 (0.79 - 12.89) |
| Republic of Cuba | Low physical activity | 3.49 (1.10 - 5.88) |
| Republic of Cuba | Secondhand smoke | 2.15 (0.56 - 3.73) |
| Republic of Cuba | Smoking | 5.03 (3.23 - 6.82) |
| Republic of Cyprus | Alcohol use | 12.82 (8.89 - 16.75) |
| Republic of Cyprus | Diet high in red meat | 23.50 (8.01 - 38.99) |
| Republic of Cyprus | High body-mass index | -9.78 (-16.89 - -2.67) |
| Republic of Cyprus | High fasting plasma glucose | 3.17 (0.28 - 6.06) |
| Republic of Cyprus | Low physical activity | 2.87 (0.75 - 4.98) |
| Republic of Cyprus | Secondhand smoke | 2.98 (0.67 - 5.30) |
| Republic of Cyprus | Smoking | 7.72 (5.13 - 10.31) |
| Republic of C么te d'Ivoire | Alcohol use | 9.13 (5.51 - 12.74) |
| Republic of C么te d'Ivoire | Diet high in red meat | 35.64 (13.27 - 58.00) |
| Republic of C么te d'Ivoire | High body-mass index | -15.74 (-26.57 - -4.91) |
| Republic of C么te d'Ivoire | High fasting plasma glucose | 5.17 (0.53 - 9.82) |
| Republic of C么te d'Ivoire | Low physical activity | 2.74 (0.62 - 4.86) |
| Republic of C么te d'Ivoire | Secondhand smoke | 2.83 (0.66 - 5.00) |
| Republic of C么te d'Ivoire | Smoking | 0.76 (0.39 - 1.14) |
| Republic of Djibouti | Alcohol use | 0.70 (0.16 - 1.24) |
| Republic of Djibouti | Diet high in red meat | 40.33 (12.47 - 68.18) |
| Republic of Djibouti | High body-mass index | -10.47 (-17.87 - -3.08) |
| Republic of Djibouti | High fasting plasma glucose | 3.09 (0.21 - 5.96) |
| Republic of Djibouti | Low physical activity | 2.56 (0.37 - 4.75) |
| Republic of Djibouti | Secondhand smoke | 6.50 (1.58 - 11.42) |
| Republic of Djibouti | Smoking | 1.52 (0.57 - 2.47) |
| Republic of Ecuador | Alcohol use | 3.83 (2.38 - 5.28) |
| Republic of Ecuador | Diet high in red meat | 24.14 (9.37 - 38.91) |
| Republic of Ecuador | High body-mass index | -13.24 (-21.55 - -4.94) |
| Republic of Ecuador | High fasting plasma glucose | 5.01 (0.47 - 9.55) |
| Republic of Ecuador | Low physical activity | 1.71 (0.32 - 3.11) |
| Republic of Ecuador | Secondhand smoke | 1.28 (0.34 - 2.21) |
| Republic of Ecuador | Smoking | 1.37 (0.88 - 1.87) |
| Republic of El Salvador | Alcohol use | 1.54 (0.89 - 2.19) |
| Republic of El Salvador | Diet high in red meat | 24.57 (9.13 - 40.00) |
| Republic of El Salvador | High body-mass index | -14.57 (-23.79 - -5.35) |
| Republic of El Salvador | High fasting plasma glucose | 4.75 (0.55 - 8.95) |
| Republic of El Salvador | Low physical activity | 2.36 (0.67 - 4.06) |
| Republic of El Salvador | Secondhand smoke | 1.54 (0.38 - 2.71) |
| Republic of El Salvador | Smoking | 1.91 (1.25 - 2.58) |
| Republic of Equatorial Guinea | Alcohol use | 14.68 (6.92 - 22.43) |
| Republic of Equatorial Guinea | Diet high in red meat | 45.63 (13.41 - 77.86) |
| Republic of Equatorial Guinea | High body-mass index | -19.47 (-34.13 - -4.80) |
| Republic of Equatorial Guinea | High fasting plasma glucose | 17.55 (2.32 - 32.79) |
| Republic of Equatorial Guinea | Low physical activity | 3.71 (0.66 - 6.75) |
| Republic of Equatorial Guinea | Secondhand smoke | 5.69 (1.16 - 10.22) |
| Republic of Equatorial Guinea | Smoking | 1.04 (0.43 - 1.66) |
| Republic of Estonia | Alcohol use | 16.55 (12.53 - 20.56) |
| Republic of Estonia | Diet high in red meat | 20.69 (7.36 - 34.02) |
| Republic of Estonia | High body-mass index | -8.26 (-14.13 - -2.38) |
| Republic of Estonia | High fasting plasma glucose | 2.78 (0.31 - 5.24) |
| Republic of Estonia | Low physical activity | 1.41 (0.34 - 2.47) |
| Republic of Estonia | Secondhand smoke | 1.47 (0.34 - 2.60) |
| Republic of Estonia | Smoking | 5.78 (4.32 - 7.23) |
| Republic of Fiji | Alcohol use | 5.21 (2.89 - 7.52) |
| Republic of Fiji | Diet high in red meat | 78.04 (29.45 - 126.62) |
| Republic of Fiji | High body-mass index | 0.00 (0.00 - 0.00) |
| Republic of Fiji | High fasting plasma glucose | 28.01 (4.13 - 51.89) |
| Republic of Fiji | Low physical activity | 14.04 (5.77 - 22.31) |
| Republic of Fiji | Secondhand smoke | 8.60 (2.37 - 14.82) |
| Republic of Fiji | Smoking | 9.77 (6.26 - 13.29) |
| Republic of Finland | Alcohol use | 16.56 (12.94 - 20.18) |
| Republic of Finland | Diet high in red meat | 20.45 (8.03 - 32.87) |
| Republic of Finland | High body-mass index | -8.37 (-13.65 - -3.08) |
| Republic of Finland | High fasting plasma glucose | 4.10 (0.89 - 7.30) |
| Republic of Finland | Low physical activity | 2.29 (0.71 - 3.86) |
| Republic of Finland | Secondhand smoke | 1.11 (0.27 - 1.94) |
| Republic of Finland | Smoking | 6.33 (4.79 - 7.87) |
| Republic of Ghana | Alcohol use | 8.94 (5.43 - 12.46) |
| Republic of Ghana | Diet high in red meat | 34.16 (12.76 - 55.56) |
| Republic of Ghana | High body-mass index | -17.02 (-28.27 - -5.76) |
| Republic of Ghana | High fasting plasma glucose | 6.06 (0.81 - 11.30) |
| Republic of Ghana | Low physical activity | 4.16 (1.35 - 6.98) |
| Republic of Ghana | Secondhand smoke | 1.68 (0.43 - 2.94) |
| Republic of Ghana | Smoking | 0.81 (0.40 - 1.22) |
| Republic of Guatemala | Alcohol use | 1.33 (0.78 - 1.89) |
| Republic of Guatemala | Diet high in red meat | 17.94 (7.20 - 28.69) |
| Republic of Guatemala | High body-mass index | -10.82 (-17.58 - -4.07) |
| Republic of Guatemala | High fasting plasma glucose | 3.83 (0.53 - 7.12) |
| Republic of Guatemala | Low physical activity | 0.93 (0.16 - 1.70) |
| Republic of Guatemala | Secondhand smoke | 1.38 (0.38 - 2.38) |
| Republic of Guatemala | Smoking | 1.05 (0.64 - 1.46) |
| Republic of Guinea | Alcohol use | 0.67 (0.27 - 1.07) |
| Republic of Guinea | Diet high in red meat | 26.57 (9.89 - 43.25) |
| Republic of Guinea | High body-mass index | -9.53 (-15.85 - -3.22) |
| Republic of Guinea | High fasting plasma glucose | 3.82 (0.45 - 7.19) |
| Republic of Guinea | Low physical activity | 1.73 (0.27 - 3.18) |
| Republic of Guinea | Secondhand smoke | 2.33 (0.60 - 4.06) |
| Republic of Guinea | Smoking | 0.51 (0.25 - 0.76) |
| Republic of Guinea-Bissau | Alcohol use | 10.25 (5.95 - 14.56) |
| Republic of Guinea-Bissau | Diet high in red meat | 42.94 (14.55 - 71.33) |
| Republic of Guinea-Bissau | High body-mass index | -15.38 (-26.47 - -4.28) |
| Republic of Guinea-Bissau | High fasting plasma glucose | 4.95 (0.48 - 9.42) |
| Republic of Guinea-Bissau | Low physical activity | 3.91 (0.93 - 6.89) |
| Republic of Guinea-Bissau | Secondhand smoke | 2.16 (0.48 - 3.85) |
| Republic of Guinea-Bissau | Smoking | 0.62 (0.32 - 0.93) |
| Republic of Guyana | Alcohol use | 11.22 (7.06 - 15.39) |
| Republic of Guyana | Diet high in red meat | 41.44 (14.49 - 68.39) |
| Republic of Guyana | High body-mass index | -25.39 (-41.95 - -8.84) |
| Republic of Guyana | High fasting plasma glucose | 19.28 (2.50 - 36.05) |
| Republic of Guyana | Low physical activity | 7.37 (2.45 - 12.30) |
| Republic of Guyana | Secondhand smoke | 4.02 (1.02 - 7.02) |
| Republic of Guyana | Smoking | 3.13 (1.84 - 4.41) |
| Republic of Haiti | Alcohol use | 9.05 (5.04 - 13.05) |
| Republic of Haiti | Diet high in red meat | 47.70 (14.86 - 80.54) |
| Republic of Haiti | High body-mass index | -19.36 (-32.72 - -6.00) |
| Republic of Haiti | High fasting plasma glucose | 7.61 (0.76 - 14.47) |
| Republic of Haiti | Low physical activity | 6.76 (1.90 - 11.61) |
| Republic of Haiti | Secondhand smoke | 2.16 (0.44 - 3.87) |
| Republic of Haiti | Smoking | 3.10 (1.72 - 4.48) |
| Republic of Honduras | Alcohol use | 1.25 (0.59 - 1.91) |
| Republic of Honduras | Diet high in red meat | 22.18 (5.72 - 38.64) |
| Republic of Honduras | High body-mass index | -9.37 (-16.65 - -2.10) |
| Republic of Honduras | High fasting plasma glucose | 3.62 (0.26 - 6.98) |
| Republic of Honduras | Low physical activity | 2.11 (0.27 - 3.95) |
| Republic of Honduras | Secondhand smoke | 2.08 (0.30 - 3.86) |
| Republic of Honduras | Smoking | 1.54 (0.86 - 2.23) |
| Republic of Iceland | Alcohol use | 21.26 (16.27 - 26.25) |
| Republic of Iceland | Diet high in red meat | 27.61 (10.95 - 44.27) |
| Republic of Iceland | High body-mass index | -12.83 (-21.00 - -4.67) |
| Republic of Iceland | High fasting plasma glucose | 5.10 (0.84 - 9.37) |
| Republic of Iceland | Low physical activity | 3.38 (1.16 - 5.59) |
| Republic of Iceland | Secondhand smoke | 1.34 (0.31 - 2.37) |
| Republic of Iceland | Smoking | 7.71 (5.66 - 9.76) |
| Republic of India | Alcohol use | 0.91 (0.55 - 1.28) |
| Republic of India | Diet high in red meat | 9.48 (3.56 - 15.40) |
| Republic of India | High body-mass index | -6.94 (-11.24 - -2.63) |
| Republic of India | High fasting plasma glucose | 5.87 (1.19 - 10.54) |
| Republic of India | Low physical activity | 1.83 (0.74 - 2.92) |
| Republic of India | Secondhand smoke | 2.56 (0.77 - 4.35) |
| Republic of India | Smoking | 0.52 (0.28 - 0.76) |
| Republic of Indonesia | Alcohol use | 0.35 (0.13 - 0.57) |
| Republic of Indonesia | Diet high in red meat | 29.84 (8.89 - 50.78) |
| Republic of Indonesia | High body-mass index | 0.00 (0.00 - 0.00) |
| Republic of Indonesia | High fasting plasma glucose | 4.95 (0.36 - 9.53) |
| Republic of Indonesia | Low physical activity | 5.39 (1.41 - 9.38) |
| Republic of Indonesia | Secondhand smoke | 7.25 (1.84 - 12.65) |
| Republic of Indonesia | Smoking | 1.35 (0.69 - 2.00) |
| Republic of Iraq | Alcohol use | 0.52 (0.27 - 0.76) |
| Republic of Iraq | Diet high in red meat | 30.72 (8.95 - 52.48) |
| Republic of Iraq | High body-mass index | -23.42 (-39.56 - -7.29) |
| Republic of Iraq | High fasting plasma glucose | 14.49 (1.68 - 27.31) |
| Republic of Iraq | Low physical activity | 9.04 (3.66 - 14.43) |
| Republic of Iraq | Secondhand smoke | 5.80 (1.21 - 10.38) |
| Republic of Iraq | Smoking | 1.73 (0.89 - 2.58) |
| Republic of Italy | Alcohol use | 16.12 (12.67 - 19.56) |
| Republic of Italy | Diet high in red meat | 25.72 (10.08 - 41.37) |
| Republic of Italy | High body-mass index | -9.34 (-15.38 - -3.31) |
| Republic of Italy | High fasting plasma glucose | 3.39 (0.57 - 6.22) |
| Republic of Italy | Low physical activity | 3.89 (1.46 - 6.32) |
| Republic of Italy | Secondhand smoke | 2.22 (0.56 - 3.87) |
| Republic of Italy | Smoking | 7.94 (6.29 - 9.59) |
| Republic of Kazakhstan | Alcohol use | 8.95 (6.38 - 11.52) |
| Republic of Kazakhstan | Diet high in red meat | 23.61 (8.84 - 38.37) |
| Republic of Kazakhstan | High body-mass index | -11.09 (-18.50 - -3.68) |
| Republic of Kazakhstan | High fasting plasma glucose | 3.39 (0.40 - 6.37) |
| Republic of Kazakhstan | Low physical activity | 1.53 (0.21 - 2.86) |
| Republic of Kazakhstan | Secondhand smoke | 2.87 (0.77 - 4.97) |
| Republic of Kazakhstan | Smoking | 2.07 (1.46 - 2.69) |
| Republic of Kenya | Alcohol use | 4.36 (2.59 - 6.13) |
| Republic of Kenya | Diet high in red meat | 36.21 (12.98 - 59.45) |
| Republic of Kenya | High body-mass index | -15.31 (-25.09 - -5.53) |
| Republic of Kenya | High fasting plasma glucose | 4.48 (0.79 - 8.16) |
| Republic of Kenya | Low physical activity | 5.27 (2.04 - 8.50) |
| Republic of Kenya | Secondhand smoke | 2.48 (0.66 - 4.29) |
| Republic of Kenya | Smoking | 0.66 (0.33 - 1.00) |
| Republic of Kiribati | Alcohol use | 1.98 (0.59 - 3.38) |
| Republic of Kiribati | Diet high in red meat | 68.76 (25.42 - 112.11) |
| Republic of Kiribati | High body-mass index | 0.00 (0.00 - 0.00) |
| Republic of Kiribati | High fasting plasma glucose | 24.96 (3.97 - 45.95) |
| Republic of Kiribati | Low physical activity | 17.42 (7.87 - 26.96) |
| Republic of Kiribati | Secondhand smoke | 14.60 (4.15 - 25.04) |
| Republic of Kiribati | Smoking | 24.07 (15.47 - 32.68) |
| Republic of Korea | Alcohol use | 10.98 (7.99 - 13.97) |
| Republic of Korea | Diet high in red meat | 19.70 (8.22 - 31.18) |
| Republic of Korea | High body-mass index | 0.00 (0.00 - 0.00) |
| Republic of Korea | High fasting plasma glucose | 3.58 (0.59 - 6.58) |
| Republic of Korea | Low physical activity | 2.92 (1.09 - 4.74) |
| Republic of Korea | Secondhand smoke | 2.23 (0.67 - 3.79) |
| Republic of Korea | Smoking | 1.43 (0.93 - 1.92) |
| Republic of Latvia | Alcohol use | 21.08 (16.23 - 25.93) |
| Republic of Latvia | Diet high in red meat | 25.52 (8.85 - 42.20) |
| Republic of Latvia | High body-mass index | -11.31 (-19.57 - -3.04) |
| Republic of Latvia | High fasting plasma glucose | 3.54 (0.25 - 6.83) |
| Republic of Latvia | Low physical activity | 2.58 (0.79 - 4.38) |
| Republic of Latvia | Secondhand smoke | 2.93 (0.70 - 5.17) |
| Republic of Latvia | Smoking | 6.48 (4.82 - 8.14) |
| Republic of Liberia | Alcohol use | 8.67 (5.35 - 11.99) |
| Republic of Liberia | Diet high in red meat | 21.41 (6.91 - 35.90) |
| Republic of Liberia | High body-mass index | -12.23 (-20.48 - -3.98) |
| Republic of Liberia | High fasting plasma glucose | 5.22 (0.60 - 9.85) |
| Republic of Liberia | Low physical activity | 5.49 (2.06 - 8.92) |
| Republic of Liberia | Secondhand smoke | 1.63 (0.41 - 2.85) |
| Republic of Liberia | Smoking | 0.54 (0.29 - 0.80) |
| Republic of Lithuania | Alcohol use | 20.49 (15.49 - 25.48) |
| Republic of Lithuania | Diet high in red meat | 27.39 (9.48 - 45.30) |
| Republic of Lithuania | High body-mass index | -11.91 (-20.12 - -3.70) |
| Republic of Lithuania | High fasting plasma glucose | 2.70 (0.24 - 5.17) |
| Republic of Lithuania | Low physical activity | 2.64 (0.85 - 4.44) |
| Republic of Lithuania | Secondhand smoke | 2.48 (0.48 - 4.48) |
| Republic of Lithuania | Smoking | 7.21 (5.16 - 9.26) |
| Republic of Madagascar | Alcohol use | 3.31 (1.59 - 5.03) |
| Republic of Madagascar | Diet high in red meat | 37.93 (13.75 - 62.11) |
| Republic of Madagascar | High body-mass index | -8.07 (-13.38 - -2.76) |
| Republic of Madagascar | High fasting plasma glucose | 2.73 (0.28 - 5.18) |
| Republic of Madagascar | Low physical activity | 2.22 (0.36 - 4.09) |
| Republic of Madagascar | Secondhand smoke | 3.57 (0.99 - 6.14) |
| Republic of Madagascar | Smoking | 0.85 (0.45 - 1.25) |
| Republic of Malawi | Alcohol use | 2.07 (1.11 - 3.03) |
| Republic of Malawi | Diet high in red meat | 29.52 (10.51 - 48.52) |
| Republic of Malawi | High body-mass index | -12.29 (-20.09 - -4.49) |
| Republic of Malawi | High fasting plasma glucose | 2.66 (0.36 - 4.97) |
| Republic of Malawi | Low physical activity | 1.23 (0.15 - 2.30) |
| Republic of Malawi | Secondhand smoke | 3.03 (0.87 - 5.19) |
| Republic of Malawi | Smoking | 0.61 (0.28 - 0.94) |
| Republic of Maldives | Alcohol use | 0.19 (0.03 - 0.35) |
| Republic of Maldives | Diet high in red meat | 10.94 (3.39 - 18.49) |
| Republic of Maldives | High body-mass index | 0.00 (0.00 - 0.00) |
| Republic of Maldives | High fasting plasma glucose | 2.08 (0.28 - 3.89) |
| Republic of Maldives | Low physical activity | 4.34 (1.89 - 6.79) |
| Republic of Maldives | Secondhand smoke | 2.71 (0.72 - 4.70) |
| Republic of Maldives | Smoking | 0.91 (0.48 - 1.35) |
| Republic of Mali | Alcohol use | 1.30 (0.66 - 1.93) |
| Republic of Mali | Diet high in red meat | 29.66 (10.04 - 49.28) |
| Republic of Mali | High body-mass index | -10.26 (-17.61 - -2.92) |
| Republic of Mali | High fasting plasma glucose | 7.78 (0.93 - 14.63) |
| Republic of Mali | Low physical activity | 2.55 (0.52 - 4.58) |
| Republic of Mali | Secondhand smoke | 2.87 (0.69 - 5.05) |
| Republic of Mali | Smoking | 0.47 (0.23 - 0.72) |
| Republic of Malta | Alcohol use | 18.81 (13.67 - 23.95) |
| Republic of Malta | Diet high in red meat | 34.56 (12.83 - 56.29) |
| Republic of Malta | High body-mass index | -14.56 (-24.05 - -5.06) |
| Republic of Malta | High fasting plasma glucose | 5.38 (0.77 - 9.99) |
| Republic of Malta | Low physical activity | 5.69 (2.33 - 9.06) |
| Republic of Malta | Secondhand smoke | 2.38 (0.54 - 4.22) |
| Republic of Malta | Smoking | 11.93 (8.87 - 14.98) |
| Republic of Mauritius | Alcohol use | 3.21 (1.51 - 4.90) |
| Republic of Mauritius | Diet high in red meat | 48.81 (20.07 - 77.55) |
| Republic of Mauritius | High body-mass index | 0.00 (0.00 - 0.00) |
| Republic of Mauritius | High fasting plasma glucose | 14.93 (2.94 - 26.92) |
| Republic of Mauritius | Low physical activity | 3.96 (1.02 - 6.90) |
| Republic of Mauritius | Secondhand smoke | 7.71 (2.35 - 13.06) |
| Republic of Mauritius | Smoking | 2.42 (1.47 - 3.37) |
| Republic of Moldova | Alcohol use | 19.20 (14.77 - 23.62) |
| Republic of Moldova | Diet high in red meat | 26.40 (9.55 - 43.25) |
| Republic of Moldova | High body-mass index | -13.02 (-22.02 - -4.03) |
| Republic of Moldova | High fasting plasma glucose | 4.39 (0.44 - 8.34) |
| Republic of Moldova | Low physical activity | 1.90 (0.44 - 3.35) |
| Republic of Moldova | Secondhand smoke | 3.42 (0.97 - 5.87) |
| Republic of Moldova | Smoking | 2.34 (1.49 - 3.19) |
| Republic of Mozambique | Alcohol use | 4.88 (2.43 - 7.32) |
| Republic of Mozambique | Diet high in red meat | 29.75 (10.94 - 48.56) |
| Republic of Mozambique | High body-mass index | -10.72 (-17.53 - -3.92) |
| Republic of Mozambique | High fasting plasma glucose | 2.33 (0.29 - 4.38) |
| Republic of Mozambique | Low physical activity | 2.10 (0.42 - 3.78) |
| Republic of Mozambique | Secondhand smoke | 2.80 (0.79 - 4.80) |
| Republic of Mozambique | Smoking | 0.99 (0.47 - 1.51) |
| Republic of Namibia | Alcohol use | 25.46 (14.87 - 36.06) |
| Republic of Namibia | Diet high in red meat | 55.82 (15.53 - 96.12) |
| Republic of Namibia | High body-mass index | -22.92 (-40.42 - -5.43) |
| Republic of Namibia | High fasting plasma glucose | 7.43 (0.45 - 14.42) |
| Republic of Namibia | Low physical activity | 6.27 (1.54 - 11.01) |
| Republic of Namibia | Secondhand smoke | 5.41 (1.21 - 9.62) |
| Republic of Namibia | Smoking | 2.60 (1.31 - 3.89) |
| Republic of Nauru | Alcohol use | 12.85 (6.20 - 19.50) |
| Republic of Nauru | Diet high in red meat | 89.75 (23.93 - 155.57) |
| Republic of Nauru | High body-mass index | 0.00 (0.00 - 0.00) |
| Republic of Nauru | High fasting plasma glucose | 22.02 (0.06 - 43.98) |
| Republic of Nauru | Low physical activity | 16.23 (5.35 - 27.11) |
| Republic of Nauru | Secondhand smoke | 13.03 (2.34 - 23.72) |
| Republic of Nauru | Smoking | 37.11 (20.54 - 53.69) |
| Republic of Nicaragua | Alcohol use | 2.26 (1.31 - 3.21) |
| Republic of Nicaragua | Diet high in red meat | 15.63 (5.63 - 25.64) |
| Republic of Nicaragua | High body-mass index | -9.78 (-16.31 - -3.26) |
| Republic of Nicaragua | High fasting plasma glucose | 2.60 (0.27 - 4.94) |
| Republic of Nicaragua | Low physical activity | 1.62 (0.33 - 2.91) |
| Republic of Nicaragua | Secondhand smoke | 1.85 (0.53 - 3.16) |
| Republic of Nicaragua | Smoking | 1.65 (0.96 - 2.34) |
| Republic of Niue | Alcohol use | 17.49 (9.70 - 25.28) |
| Republic of Niue | Diet high in red meat | 71.91 (29.49 - 114.34) |
| Republic of Niue | High body-mass index | 0.00 (0.00 - 0.00) |
| Republic of Niue | High fasting plasma glucose | 24.34 (5.05 - 43.63) |
| Republic of Niue | Low physical activity | 12.65 (5.46 - 19.85) |
| Republic of Niue | Secondhand smoke | 6.13 (1.83 - 10.44) |
| Republic of Niue | Smoking | 12.04 (7.18 - 16.90) |
| Republic of Palau | Alcohol use | 13.58 (6.35 - 20.81) |
| Republic of Palau | Diet high in red meat | 70.82 (29.49 - 112.14) |
| Republic of Palau | High body-mass index | 0.00 (0.00 - 0.00) |
| Republic of Palau | High fasting plasma glucose | 24.67 (5.00 - 44.35) |
| Republic of Palau | Low physical activity | 12.76 (5.44 - 20.08) |
| Republic of Palau | Secondhand smoke | 5.95 (1.70 - 10.21) |
| Republic of Palau | Smoking | 6.14 (3.92 - 8.37) |
| Republic of Panama | Alcohol use | 5.58 (3.58 - 7.58) |
| Republic of Panama | Diet high in red meat | 32.84 (14.06 - 51.61) |
| Republic of Panama | High body-mass index | -11.52 (-18.19 - -4.85) |
| Republic of Panama | High fasting plasma glucose | 5.99 (1.14 - 10.83) |
| Republic of Panama | Low physical activity | 2.95 (0.95 - 4.95) |
| Republic of Panama | Secondhand smoke | 1.47 (0.40 - 2.55) |
| Republic of Panama | Smoking | 1.64 (1.04 - 2.24) |
| Republic of Paraguay | Alcohol use | 12.63 (8.02 - 17.24) |
| Republic of Paraguay | Diet high in red meat | 32.61 (11.36 - 53.86) |
| Republic of Paraguay | High body-mass index | -16.25 (-27.33 - -5.17) |
| Republic of Paraguay | High fasting plasma glucose | 5.94 (0.69 - 11.20) |
| Republic of Paraguay | Low physical activity | 2.04 (0.30 - 3.78) |
| Republic of Paraguay | Secondhand smoke | 2.88 (0.65 - 5.10) |
| Republic of Paraguay | Smoking | 4.35 (2.66 - 6.03) |
| Republic of Peru | Alcohol use | 9.06 (5.88 - 12.24) |
| Republic of Peru | Diet high in red meat | 21.86 (7.29 - 36.43) |
| Republic of Peru | High body-mass index | -11.91 (-19.74 - -4.09) |
| Republic of Peru | High fasting plasma glucose | 2.50 (0.15 - 4.86) |
| Republic of Peru | Low physical activity | 1.73 (0.27 - 3.19) |
| Republic of Peru | Secondhand smoke | 0.93 (0.19 - 1.67) |
| Republic of Peru | Smoking | 1.06 (0.64 - 1.48) |
| Republic of Poland | Alcohol use | 14.93 (11.39 - 18.48) |
| Republic of Poland | Diet high in red meat | 25.91 (10.31 - 41.50) |
| Republic of Poland | High body-mass index | -9.85 (-16.21 - -3.49) |
| Republic of Poland | High fasting plasma glucose | 4.45 (0.66 - 8.25) |
| Republic of Poland | Low physical activity | 2.92 (1.03 - 4.80) |
| Republic of Poland | Secondhand smoke | 2.21 (0.55 - 3.86) |
| Republic of Poland | Smoking | 8.72 (6.75 - 10.69) |
| Republic of Rwanda | Alcohol use | 13.59 (8.08 - 19.11) |
| Republic of Rwanda | Diet high in red meat | 34.05 (12.53 - 55.57) |
| Republic of Rwanda | High body-mass index | -13.15 (-21.44 - -4.86) |
| Republic of Rwanda | High fasting plasma glucose | 2.12 (0.28 - 3.97) |
| Republic of Rwanda | Low physical activity | 2.25 (0.34 - 4.16) |
| Republic of Rwanda | Secondhand smoke | 2.89 (0.79 - 4.98) |
| Republic of Rwanda | Smoking | 2.51 (1.36 - 3.66) |
| Republic of San Marino | Alcohol use | 13.49 (5.65 - 21.33) |
| Republic of San Marino | Diet high in red meat | 17.80 (5.32 - 30.29) |
| Republic of San Marino | High body-mass index | -7.58 (-13.37 - -1.80) |
| Republic of San Marino | High fasting plasma glucose | 3.12 (0.27 - 5.98) |
| Republic of San Marino | Low physical activity | 2.24 (0.54 - 3.94) |
| Republic of San Marino | Secondhand smoke | 1.05 (0.19 - 1.90) |
| Republic of San Marino | Smoking | 5.89 (3.49 - 8.30) |
| Republic of Senegal | Alcohol use | 1.18 (0.44 - 1.92) |
| Republic of Senegal | Diet high in red meat | 28.73 (10.03 - 47.43) |
| Republic of Senegal | High body-mass index | -11.26 (-19.06 - -3.46) |
| Republic of Senegal | High fasting plasma glucose | 5.10 (0.46 - 9.75) |
| Republic of Senegal | Low physical activity | 2.69 (0.57 - 4.81) |
| Republic of Senegal | Secondhand smoke | 2.28 (0.61 - 3.96) |
| Republic of Senegal | Smoking | 0.28 (0.14 - 0.42) |
| Republic of Serbia | Alcohol use | 8.10 (5.30 - 10.91) |
| Republic of Serbia | Diet high in red meat | 32.83 (12.17 - 53.48) |
| Republic of Serbia | High body-mass index | -15.45 (-26.03 - -4.87) |
| Republic of Serbia | High fasting plasma glucose | 4.82 (0.40 - 9.24) |
| Republic of Serbia | Low physical activity | 2.92 (0.72 - 5.11) |
| Republic of Serbia | Secondhand smoke | 3.25 (0.75 - 5.75) |
| Republic of Serbia | Smoking | 17.98 (13.43 - 22.53) |
| Republic of Seychelles | Alcohol use | 2.92 (1.70 - 4.13) |
| Republic of Seychelles | Diet high in red meat | 41.20 (16.23 - 66.17) |
| Republic of Seychelles | High body-mass index | 0.00 (0.00 - 0.00) |
| Republic of Seychelles | High fasting plasma glucose | 11.15 (1.96 - 20.34) |
| Republic of Seychelles | Low physical activity | 3.64 (1.11 - 6.18) |
| Republic of Seychelles | Secondhand smoke | 5.77 (1.78 - 9.76) |
| Republic of Seychelles | Smoking | 2.74 (1.60 - 3.87) |
| Republic of Sierra Leone | Alcohol use | 3.82 (2.25 - 5.40) |
| Republic of Sierra Leone | Diet high in red meat | 19.53 (6.82 - 32.24) |
| Republic of Sierra Leone | High body-mass index | -9.79 (-16.60 - -2.98) |
| Republic of Sierra Leone | High fasting plasma glucose | 3.03 (0.44 - 5.62) |
| Republic of Sierra Leone | Low physical activity | 2.58 (0.71 - 4.45) |
| Republic of Sierra Leone | Secondhand smoke | 2.72 (0.69 - 4.75) |
| Republic of Sierra Leone | Smoking | 1.01 (0.53 - 1.48) |
| Republic of Singapore | Alcohol use | 5.04 (3.50 - 6.59) |
| Republic of Singapore | Diet high in red meat | 18.14 (6.07 - 30.22) |
| Republic of Singapore | High body-mass index | 0.00 (0.00 - 0.00) |
| Republic of Singapore | High fasting plasma glucose | 3.98 (0.39 - 7.57) |
| Republic of Singapore | Low physical activity | 2.53 (0.91 - 4.14) |
| Republic of Singapore | Secondhand smoke | 1.19 (0.24 - 2.15) |
| Republic of Singapore | Smoking | 1.80 (1.03 - 2.58) |
| Republic of Slovenia | Alcohol use | 5.28 (2.90 - 7.67) |
| Republic of Slovenia | Diet high in red meat | 16.02 (6.31 - 25.74) |
| Republic of Slovenia | High body-mass index | -6.55 (-10.74 - -2.36) |
| Republic of Slovenia | High fasting plasma glucose | 2.44 (0.35 - 4.54) |
| Republic of Slovenia | Low physical activity | 1.39 (0.40 - 2.39) |
| Republic of Slovenia | Secondhand smoke | 1.55 (0.42 - 2.68) |
| Republic of Slovenia | Smoking | 6.10 (4.57 - 7.64) |
| Republic of South Africa | Alcohol use | 12.43 (8.45 - 16.41) |
| Republic of South Africa | Diet high in red meat | 43.88 (17.07 - 70.68) |
| Republic of South Africa | High body-mass index | -24.63 (-39.85 - -9.40) |
| Republic of South Africa | High fasting plasma glucose | 6.33 (1.05 - 11.60) |
| Republic of South Africa | Low physical activity | 7.70 (3.72 - 11.69) |
| Republic of South Africa | Secondhand smoke | 5.03 (1.63 - 8.42) |
| Republic of South Africa | Smoking | 5.06 (3.47 - 6.66) |
| Republic of South Sudan | Alcohol use | 0.48 (0.11 - 0.85) |
| Republic of South Sudan | Diet high in red meat | 25.39 (8.85 - 41.94) |
| Republic of South Sudan | High body-mass index | -6.03 (-10.28 - -1.77) |
| Republic of South Sudan | High fasting plasma glucose | 2.19 (0.24 - 4.13) |
| Republic of South Sudan | Low physical activity | 1.55 (0.23 - 2.88) |
| Republic of South Sudan | Secondhand smoke | 1.96 (0.52 - 3.39) |
| Republic of South Sudan | Smoking | 0.59 (0.28 - 0.89) |
| Republic of Sudan | Alcohol use | 0.00 (-0.00 - 0.00) |
| Republic of Sudan | Diet high in red meat | 19.98 (5.50 - 34.47) |
| Republic of Sudan | High body-mass index | -11.89 (-19.55 - -4.23) |
| Republic of Sudan | High fasting plasma glucose | 3.89 (0.06 - 7.72) |
| Republic of Sudan | Low physical activity | 7.22 (3.38 - 11.07) |
| Republic of Sudan | Secondhand smoke | 1.85 (0.27 - 3.42) |
| Republic of Sudan | Smoking | 0.51 (0.23 - 0.78) |
| Republic of Suriname | Alcohol use | 7.97 (4.88 - 11.05) |
| Republic of Suriname | Diet high in red meat | 33.03 (12.45 - 53.61) |
| Republic of Suriname | High body-mass index | -15.53 (-25.95 - -5.10) |
| Republic of Suriname | High fasting plasma glucose | 10.51 (1.61 - 19.42) |
| Republic of Suriname | Low physical activity | 6.03 (2.54 - 9.53) |
| Republic of Suriname | Secondhand smoke | 3.26 (0.79 - 5.73) |
| Republic of Suriname | Smoking | 4.47 (2.62 - 6.31) |
| Republic of Tajikistan | Alcohol use | 0.48 (0.25 - 0.71) |
| Republic of Tajikistan | Diet high in red meat | 25.19 (7.98 - 42.40) |
| Republic of Tajikistan | High body-mass index | -11.83 (-20.15 - -3.52) |
| Republic of Tajikistan | High fasting plasma glucose | 3.97 (0.41 - 7.52) |
| Republic of Tajikistan | Low physical activity | 1.47 (0.22 - 2.72) |
| Republic of Tajikistan | Secondhand smoke | 2.06 (0.56 - 3.56) |
| Republic of Tajikistan | Smoking | 0.68 (0.38 - 0.98) |
| Republic of Trinidad and Tobago | Alcohol use | 15.73 (10.00 - 21.46) |
| Republic of Trinidad and Tobago | Diet high in red meat | 53.40 (19.24 - 87.56) |
| Republic of Trinidad and Tobago | High body-mass index | -27.62 (-45.25 - -9.99) |
| Republic of Trinidad and Tobago | High fasting plasma glucose | 11.54 (2.25 - 20.83) |
| Republic of Trinidad and Tobago | Low physical activity | 11.44 (5.08 - 17.80) |
| Republic of Trinidad and Tobago | Secondhand smoke | 4.69 (1.17 - 8.20) |
| Republic of Trinidad and Tobago | Smoking | 5.46 (3.55 - 7.37) |
| Republic of Tunisia | Alcohol use | 0.04 (0.02 - 0.07) |
| Republic of Tunisia | Diet high in red meat | 23.75 (8.78 - 38.72) |
| Republic of Tunisia | High body-mass index | -13.44 (-22.45 - -4.43) |
| Republic of Tunisia | High fasting plasma glucose | 4.84 (0.49 - 9.18) |
| Republic of Tunisia | Low physical activity | 1.92 (0.56 - 3.29) |
| Republic of Tunisia | Secondhand smoke | 3.78 (0.89 - 6.66) |
| Republic of Tunisia | Smoking | 0.75 (0.37 - 1.12) |
| Republic of Turkey | Alcohol use | 1.28 (0.79 - 1.78) |
| Republic of Turkey | Diet high in red meat | 27.46 (11.43 - 43.48) |
| Republic of Turkey | High body-mass index | -15.88 (-25.83 - -5.93) |
| Republic of Turkey | High fasting plasma glucose | 6.21 (1.22 - 11.20) |
| Republic of Turkey | Low physical activity | 3.61 (1.42 - 5.80) |
| Republic of Turkey | Secondhand smoke | 3.45 (0.95 - 5.95) |
| Republic of Turkey | Smoking | 6.43 (4.56 - 8.30) |
| Republic of Uganda | Alcohol use | 14.03 (8.81 - 19.25) |
| Republic of Uganda | Diet high in red meat | 44.09 (15.61 - 72.56) |
| Republic of Uganda | High body-mass index | -15.82 (-26.25 - -5.39) |
| Republic of Uganda | High fasting plasma glucose | 3.87 (0.52 - 7.23) |
| Republic of Uganda | Low physical activity | 2.62 (0.43 - 4.81) |
| Republic of Uganda | Secondhand smoke | 2.47 (0.60 - 4.33) |
| Republic of Uganda | Smoking | 1.43 (0.78 - 2.08) |
| Republic of Uzbekistan | Alcohol use | 2.43 (1.50 - 3.35) |
| Republic of Uzbekistan | Diet high in red meat | 27.68 (11.41 - 43.95) |
| Republic of Uzbekistan | High body-mass index | -13.41 (-21.74 - -5.08) |
| Republic of Uzbekistan | High fasting plasma glucose | 3.69 (0.71 - 6.68) |
| Republic of Uzbekistan | Low physical activity | 1.46 (0.45 - 2.46) |
| Republic of Uzbekistan | Secondhand smoke | 2.90 (0.92 - 4.88) |
| Republic of Uzbekistan | Smoking | 0.93 (0.56 - 1.29) |
| Republic of Vanuatu | Alcohol use | 2.47 (1.29 - 3.66) |
| Republic of Vanuatu | Diet high in red meat | 48.73 (17.79 - 79.68) |
| Republic of Vanuatu | High body-mass index | 0.00 (0.00 - 0.00) |
| Republic of Vanuatu | High fasting plasma glucose | 15.00 (1.99 - 28.01) |
| Republic of Vanuatu | Low physical activity | 1.61 (0.15 - 3.07) |
| Republic of Vanuatu | Secondhand smoke | 4.91 (1.07 - 8.75) |
| Republic of Vanuatu | Smoking | 1.34 (0.67 - 2.01) |
| Republic of Yemen | Alcohol use | 0.08 (0.03 - 0.13) |
| Republic of Yemen | Diet high in red meat | 17.50 (4.93 - 30.08) |
| Republic of Yemen | High body-mass index | -6.84 (-11.93 - -1.75) |
| Republic of Yemen | High fasting plasma glucose | 2.53 (0.08 - 4.97) |
| Republic of Yemen | Low physical activity | 3.46 (1.20 - 5.72) |
| Republic of Yemen | Secondhand smoke | 2.25 (0.44 - 4.06) |
| Republic of Yemen | Smoking | 2.48 (1.21 - 3.74) |
| Republic of Zambia | Alcohol use | 15.14 (8.03 - 22.26) |
| Republic of Zambia | Diet high in red meat | 66.62 (21.62 - 111.62) |
| Republic of Zambia | High body-mass index | -24.40 (-41.56 - -7.25) |
| Republic of Zambia | High fasting plasma glucose | 8.56 (0.96 - 16.15) |
| Republic of Zambia | Low physical activity | 4.65 (1.03 - 8.27) |
| Republic of Zambia | Secondhand smoke | 6.64 (1.71 - 11.58) |
| Republic of Zambia | Smoking | 1.11 (0.45 - 1.77) |
| Republic of Zimbabwe | Alcohol use | 5.16 (2.46 - 7.86) |
| Republic of Zimbabwe | Diet high in red meat | 56.27 (18.44 - 94.11) |
| Republic of Zimbabwe | High body-mass index | -25.42 (-43.53 - -7.30) |
| Republic of Zimbabwe | High fasting plasma glucose | 6.23 (0.85 - 11.61) |
| Republic of Zimbabwe | Low physical activity | 4.06 (0.86 - 7.25) |
| Republic of Zimbabwe | Secondhand smoke | 6.39 (1.69 - 11.09) |
| Republic of Zimbabwe | Smoking | 0.94 (0.44 - 1.44) |
| Republic of the Congo | Alcohol use | 25.56 (12.71 - 38.41) |
| Republic of the Congo | Diet high in red meat | 58.42 (14.01 - 102.83) |
| Republic of the Congo | High body-mass index | -22.93 (-39.95 - -5.90) |
| Republic of the Congo | High fasting plasma glucose | 7.49 (0.59 - 14.39) |
| Republic of the Congo | Low physical activity | 4.86 (1.14 - 8.58) |
| Republic of the Congo | Secondhand smoke | 4.09 (0.69 - 7.49) |
| Republic of the Congo | Smoking | 1.21 (0.52 - 1.91) |
| Republic of the Gambia | Alcohol use | 2.69 (1.49 - 3.89) |
| Republic of the Gambia | Diet high in red meat | 13.40 (4.05 - 22.76) |
| Republic of the Gambia | High body-mass index | -7.31 (-12.56 - -2.06) |
| Republic of the Gambia | High fasting plasma glucose | 2.05 (0.17 - 3.94) |
| Republic of the Gambia | Low physical activity | 1.42 (0.35 - 2.49) |
| Republic of the Gambia | Secondhand smoke | 1.55 (0.36 - 2.75) |
| Republic of the Gambia | Smoking | 0.16 (0.08 - 0.23) |
| Republic of the Marshall Islands | Alcohol use | 2.60 (1.13 - 4.06) |
| Republic of the Marshall Islands | Diet high in red meat | 76.32 (22.00 - 130.63) |
| Republic of the Marshall Islands | High body-mass index | 0.00 (0.00 - 0.00) |
| Republic of the Marshall Islands | High fasting plasma glucose | 25.74 (2.66 - 48.81) |
| Republic of the Marshall Islands | Low physical activity | 22.41 (9.41 - 35.41) |
| Republic of the Marshall Islands | Secondhand smoke | 8.94 (1.73 - 16.16) |
| Republic of the Marshall Islands | Smoking | 8.85 (4.35 - 13.35) |
| Republic of the Niger | Alcohol use | 0.48 (0.12 - 0.83) |
| Republic of the Niger | Diet high in red meat | 15.97 (4.99 - 26.95) |
| Republic of the Niger | High body-mass index | -4.94 (-8.46 - -1.42) |
| Republic of the Niger | High fasting plasma glucose | 2.91 (0.39 - 5.44) |
| Republic of the Niger | Low physical activity | 1.46 (0.23 - 2.68) |
| Republic of the Niger | Secondhand smoke | 0.92 (0.18 - 1.65) |
| Republic of the Niger | Smoking | 0.17 (0.08 - 0.26) |
| Republic of the Philippines | Alcohol use | 13.66 (9.29 - 18.02) |
| Republic of the Philippines | Diet high in red meat | 56.13 (22.22 - 90.04) |
| Republic of the Philippines | High body-mass index | 0.00 (0.00 - 0.00) |
| Republic of the Philippines | High fasting plasma glucose | 5.76 (0.84 - 10.69) |
| Republic of the Philippines | Low physical activity | 3.63 (0.90 - 6.37) |
| Republic of the Philippines | Secondhand smoke | 7.49 (2.00 - 12.98) |
| Republic of the Philippines | Smoking | 3.38 (2.31 - 4.44) |
| Republic of the Union of Myanmar | Alcohol use | 0.73 (0.36 - 1.09) |
| Republic of the Union of Myanmar | Diet high in red meat | 47.24 (18.77 - 75.71) |
| Republic of the Union of Myanmar | High body-mass index | 0.00 (0.00 - 0.00) |
| Republic of the Union of Myanmar | High fasting plasma glucose | 8.11 (1.10 - 15.11) |
| Republic of the Union of Myanmar | Low physical activity | 1.40 (0.08 - 2.72) |
| Republic of the Union of Myanmar | Secondhand smoke | 6.13 (2.12 - 10.14) |
| Republic of the Union of Myanmar | Smoking | 2.22 (1.18 - 3.25) |
| Romania | Alcohol use | 15.58 (11.40 - 19.75) |
| Romania | Diet high in red meat | 30.42 (11.51 - 49.33) |
| Romania | High body-mass index | -11.49 (-18.89 - -4.10) |
| Romania | High fasting plasma glucose | 5.70 (0.43 - 10.97) |
| Romania | Low physical activity | 3.39 (1.08 - 5.69) |
| Romania | Secondhand smoke | 3.38 (0.94 - 5.82) |
| Romania | Smoking | 11.06 (8.51 - 13.61) |
| Russian Federation | Alcohol use | 17.00 (13.09 - 20.92) |
| Russian Federation | Diet high in red meat | 29.39 (12.25 - 46.53) |
| Russian Federation | High body-mass index | -14.29 (-23.32 - -5.26) |
| Russian Federation | High fasting plasma glucose | 3.98 (0.53 - 7.42) |
| Russian Federation | Low physical activity | 1.83 (0.50 - 3.17) |
| Russian Federation | Secondhand smoke | 3.34 (0.96 - 5.72) |
| Russian Federation | Smoking | 7.39 (5.80 - 8.99) |
| Saint Kitts and Nevis | Alcohol use | 6.29 (0.88 - 11.70) |
| Saint Kitts and Nevis | Diet high in red meat | 35.18 (12.67 - 57.68) |
| Saint Kitts and Nevis | High body-mass index | -18.40 (-30.74 - -6.06) |
| Saint Kitts and Nevis | High fasting plasma glucose | 8.36 (0.48 - 16.23) |
| Saint Kitts and Nevis | Low physical activity | 4.95 (1.34 - 8.55) |
| Saint Kitts and Nevis | Secondhand smoke | 1.55 (0.29 - 2.81) |
| Saint Kitts and Nevis | Smoking | 1.56 (0.77 - 2.35) |
| Saint Lucia | Alcohol use | 27.66 (20.23 - 35.10) |
| Saint Lucia | Diet high in red meat | 48.44 (18.69 - 78.19) |
| Saint Lucia | High body-mass index | -27.02 (-44.11 - -9.93) |
| Saint Lucia | High fasting plasma glucose | 13.03 (1.97 - 24.09) |
| Saint Lucia | Low physical activity | 6.47 (2.39 - 10.56) |
| Saint Lucia | Secondhand smoke | 2.51 (0.70 - 4.33) |
| Saint Lucia | Smoking | 3.87 (2.44 - 5.31) |
| Saint Vincent and the Grenadines | Alcohol use | 27.42 (18.58 - 36.26) |
| Saint Vincent and the Grenadines | Diet high in red meat | 64.16 (25.56 - 102.77) |
| Saint Vincent and the Grenadines | High body-mass index | -29.09 (-47.87 - -10.31) |
| Saint Vincent and the Grenadines | High fasting plasma glucose | 14.71 (2.37 - 27.05) |
| Saint Vincent and the Grenadines | Low physical activity | 8.61 (2.89 - 14.34) |
| Saint Vincent and the Grenadines | Secondhand smoke | 3.70 (0.92 - 6.47) |
| Saint Vincent and the Grenadines | Smoking | 4.21 (2.59 - 5.83) |
| Slovak Republic | Alcohol use | 14.56 (10.47 - 18.64) |
| Slovak Republic | Diet high in red meat | 23.64 (8.74 - 38.54) |
| Slovak Republic | High body-mass index | -9.29 (-15.64 - -2.94) |
| Slovak Republic | High fasting plasma glucose | 3.26 (0.25 - 6.28) |
| Slovak Republic | Low physical activity | 2.00 (0.57 - 3.43) |
| Slovak Republic | Secondhand smoke | 2.52 (0.65 - 4.38) |
| Slovak Republic | Smoking | 7.37 (5.16 - 9.59) |
| Socialist Republic of Viet Nam | Alcohol use | 1.40 (0.70 - 2.10) |
| Socialist Republic of Viet Nam | Diet high in red meat | 25.16 (8.03 - 42.30) |
| Socialist Republic of Viet Nam | High body-mass index | 0.00 (0.00 - 0.00) |
| Socialist Republic of Viet Nam | High fasting plasma glucose | 1.98 (0.09 - 3.86) |
| Socialist Republic of Viet Nam | Low physical activity | 2.33 (0.62 - 4.04) |
| Socialist Republic of Viet Nam | Secondhand smoke | 4.12 (1.17 - 7.07) |
| Socialist Republic of Viet Nam | Smoking | 0.53 (0.25 - 0.81) |
| Solomon Islands | Alcohol use | 1.34 (0.50 - 2.18) |
| Solomon Islands | Diet high in red meat | 52.99 (16.93 - 89.04) |
| Solomon Islands | High body-mass index | 0.00 (0.00 - 0.00) |
| Solomon Islands | High fasting plasma glucose | 9.51 (0.52 - 18.50) |
| Solomon Islands | Low physical activity | 11.08 (3.91 - 18.26) |
| Solomon Islands | Secondhand smoke | 9.37 (2.11 - 16.62) |
| Solomon Islands | Smoking | 8.99 (5.40 - 12.59) |
| State of Eritrea | Alcohol use | 1.75 (0.51 - 2.99) |
| State of Eritrea | Diet high in red meat | 44.01 (12.43 - 75.59) |
| State of Eritrea | High body-mass index | -8.23 (-13.91 - -2.54) |
| State of Eritrea | High fasting plasma glucose | 2.90 (0.24 - 5.56) |
| State of Eritrea | Low physical activity | 1.52 (0.00 - 3.04) |
| State of Eritrea | Secondhand smoke | 2.89 (0.65 - 5.12) |
| State of Eritrea | Smoking | 0.27 (0.12 - 0.42) |
| State of Israel | Alcohol use | 10.09 (6.85 - 13.33) |
| State of Israel | Diet high in red meat | 25.77 (10.58 - 40.97) |
| State of Israel | High body-mass index | -10.65 (-17.39 - -3.91) |
| State of Israel | High fasting plasma glucose | 4.24 (0.50 - 7.97) |
| State of Israel | Low physical activity | 3.05 (0.98 - 5.12) |
| State of Israel | Secondhand smoke | 1.97 (0.49 - 3.45) |
| State of Israel | Smoking | 6.45 (4.75 - 8.16) |
| State of Kuwait | Alcohol use | 0.01 (0.00 - 0.02) |
| State of Kuwait | Diet high in red meat | 18.16 (7.66 - 28.66) |
| State of Kuwait | High body-mass index | -11.66 (-18.78 - -4.53) |
| State of Kuwait | High fasting plasma glucose | 4.51 (0.68 - 8.34) |
| State of Kuwait | Low physical activity | 5.54 (2.96 - 8.13) |
| State of Kuwait | Secondhand smoke | 2.52 (0.77 - 4.27) |
| State of Kuwait | Smoking | 0.82 (0.47 - 1.17) |
| State of Libya | Alcohol use | 0.04 (0.02 - 0.06) |
| State of Libya | Diet high in red meat | 27.72 (9.20 - 46.23) |
| State of Libya | High body-mass index | -17.73 (-30.26 - -5.20) |
| State of Libya | High fasting plasma glucose | 6.01 (0.44 - 11.58) |
| State of Libya | Low physical activity | 5.34 (2.11 - 8.57) |
| State of Libya | Secondhand smoke | 4.86 (1.18 - 8.54) |
| State of Libya | Smoking | 0.34 (0.15 - 0.52) |
| State of Qatar | Alcohol use | 0.12 (0.06 - 0.19) |
| State of Qatar | Diet high in red meat | 26.36 (10.33 - 42.38) |
| State of Qatar | High body-mass index | -16.86 (-27.94 - -5.78) |
| State of Qatar | High fasting plasma glucose | 7.27 (0.74 - 13.80) |
| State of Qatar | Low physical activity | 6.09 (2.93 - 9.25) |
| State of Qatar | Secondhand smoke | 2.73 (0.78 - 4.68) |
| State of Qatar | Smoking | 0.76 (0.39 - 1.12) |
| Sultanate of Oman | Alcohol use | 0.02 (0.01 - 0.04) |
| Sultanate of Oman | Diet high in red meat | 6.39 (2.29 - 10.49) |
| Sultanate of Oman | High body-mass index | -4.09 (-6.90 - -1.29) |
| Sultanate of Oman | High fasting plasma glucose | 1.66 (0.22 - 3.10) |
| Sultanate of Oman | Low physical activity | 1.22 (0.48 - 1.95) |
| Sultanate of Oman | Secondhand smoke | 0.47 (0.07 - 0.87) |
| Sultanate of Oman | Smoking | 0.19 (0.10 - 0.28) |
| Swiss Confederation | Alcohol use | 12.64 (9.89 - 15.39) |
| Swiss Confederation | Diet high in red meat | 16.24 (6.17 - 26.32) |
| Swiss Confederation | High body-mass index | -5.86 (-9.60 - -2.12) |
| Swiss Confederation | High fasting plasma glucose | 2.32 (0.29 - 4.36) |
| Swiss Confederation | Low physical activity | 1.98 (0.57 - 3.39) |
| Swiss Confederation | Secondhand smoke | 0.98 (0.22 - 1.73) |
| Swiss Confederation | Smoking | 5.54 (4.00 - 7.08) |
| Syrian Arab Republic | Alcohol use | 0.22 (0.10 - 0.34) |
| Syrian Arab Republic | Diet high in red meat | 25.27 (9.29 - 41.26) |
| Syrian Arab Republic | High body-mass index | -16.18 (-26.80 - -5.57) |
| Syrian Arab Republic | High fasting plasma glucose | 5.34 (0.40 - 10.29) |
| Syrian Arab Republic | Low physical activity | 4.76 (1.76 - 7.75) |
| Syrian Arab Republic | Secondhand smoke | 3.48 (1.02 - 5.93) |
| Syrian Arab Republic | Smoking | 1.61 (0.79 - 2.43) |
| Taiwan (Province of China) | Alcohol use | 2.89 (1.62 - 4.16) |
| Taiwan (Province of China) | Diet high in red meat | 29.44 (11.16 - 47.71) |
| Taiwan (Province of China) | High body-mass index | 0.00 (0.00 - 0.00) |
| Taiwan (Province of China) | High fasting plasma glucose | 5.44 (0.55 - 10.33) |
| Taiwan (Province of China) | Low physical activity | 5.15 (2.10 - 8.20) |
| Taiwan (Province of China) | Secondhand smoke | 4.31 (1.19 - 7.43) |
| Taiwan (Province of China) | Smoking | 1.47 (0.85 - 2.08) |
| Togolese Republic | Alcohol use | 6.89 (4.06 - 9.72) |
| Togolese Republic | Diet high in red meat | 25.65 (8.46 - 42.84) |
| Togolese Republic | High body-mass index | -12.38 (-20.71 - -4.05) |
| Togolese Republic | High fasting plasma glucose | 2.71 (0.31 - 5.11) |
| Togolese Republic | Low physical activity | 1.27 (0.19 - 2.35) |
| Togolese Republic | Secondhand smoke | 2.44 (0.70 - 4.19) |
| Togolese Republic | Smoking | 0.47 (0.24 - 0.70) |
| Tokelau | Alcohol use | 7.97 (4.01 - 11.93) |
| Tokelau | Diet high in red meat | 76.99 (29.29 - 124.69) |
| Tokelau | High body-mass index | 0.00 (0.00 - 0.00) |
| Tokelau | High fasting plasma glucose | 25.32 (5.51 - 45.13) |
| Tokelau | Low physical activity | 13.74 (6.38 - 21.10) |
| Tokelau | Secondhand smoke | 9.06 (2.73 - 15.38) |
| Tokelau | Smoking | 12.01 (6.31 - 17.70) |
| Turkmenistan | Alcohol use | 6.17 (3.74 - 8.61) |
| Turkmenistan | Diet high in red meat | 35.26 (13.14 - 57.39) |
| Turkmenistan | High body-mass index | -15.58 (-25.80 - -5.36) |
| Turkmenistan | High fasting plasma glucose | 5.38 (0.64 - 10.12) |
| Turkmenistan | Low physical activity | 2.11 (0.41 - 3.81) |
| Turkmenistan | Secondhand smoke | 3.33 (0.97 - 5.70) |
| Turkmenistan | Smoking | 2.22 (1.27 - 3.17) |
| Tuvalu | Alcohol use | 3.81 (1.54 - 6.08) |
| Tuvalu | Diet high in red meat | 65.22 (22.22 - 108.23) |
| Tuvalu | High body-mass index | 0.00 (0.00 - 0.00) |
| Tuvalu | High fasting plasma glucose | 12.68 (1.67 - 23.70) |
| Tuvalu | Low physical activity | 11.92 (4.40 - 19.45) |
| Tuvalu | Secondhand smoke | 10.43 (2.61 - 18.24) |
| Tuvalu | Smoking | 12.96 (7.62 - 18.30) |
| Ukraine | Alcohol use | 15.42 (9.63 - 21.20) |
| Ukraine | Diet high in red meat | 29.10 (8.94 - 49.26) |
| Ukraine | High body-mass index | -13.20 (-23.27 - -3.12) |
| Ukraine | High fasting plasma glucose | 3.39 (0.23 - 6.55) |
| Ukraine | Low physical activity | 1.74 (0.35 - 3.14) |
| Ukraine | Secondhand smoke | 2.94 (0.52 - 5.35) |
| Ukraine | Smoking | 5.21 (3.23 - 7.19) |
| Union of the Comoros | Alcohol use | 0.84 (0.41 - 1.27) |
| Union of the Comoros | Diet high in red meat | 38.67 (13.54 - 63.79) |
| Union of the Comoros | High body-mass index | -16.83 (-27.80 - -5.86) |
| Union of the Comoros | High fasting plasma glucose | 3.32 (0.54 - 6.10) |
| Union of the Comoros | Low physical activity | 3.02 (0.77 - 5.27) |
| Union of the Comoros | Secondhand smoke | 4.64 (1.26 - 8.01) |
| Union of the Comoros | Smoking | 1.18 (0.60 - 1.76) |
| United Arab Emirates | Alcohol use | 0.75 (0.31 - 1.18) |
| United Arab Emirates | Diet high in red meat | 27.25 (10.69 - 43.82) |
| United Arab Emirates | High body-mass index | -17.51 (-28.44 - -6.57) |
| United Arab Emirates | High fasting plasma glucose | 9.73 (2.19 - 17.27) |
| United Arab Emirates | Low physical activity | 4.25 (1.69 - 6.82) |
| United Arab Emirates | Secondhand smoke | 2.73 (0.78 - 4.67) |
| United Arab Emirates | Smoking | 1.39 (0.74 - 2.05) |
| United Kingdom of Great Britain and Northern Ireland | Alcohol use | 23.31 (19.09 - 27.53) |
| United Kingdom of Great Britain and Northern Ireland | Diet high in red meat | 27.51 (11.35 - 43.67) |
| United Kingdom of Great Britain and Northern Ireland | High body-mass index | -12.71 (-20.58 - -4.85) |
| United Kingdom of Great Britain and Northern Ireland | High fasting plasma glucose | 3.11 (0.60 - 5.61) |
| United Kingdom of Great Britain and Northern Ireland | Low physical activity | 6.19 (3.19 - 9.19) |
| United Kingdom of Great Britain and Northern Ireland | Secondhand smoke | 1.48 (0.37 - 2.59) |
| United Kingdom of Great Britain and Northern Ireland | Smoking | 8.37 (6.66 - 10.09) |
| United Mexican States | Alcohol use | 5.24 (3.59 - 6.89) |
| United Mexican States | Diet high in red meat | 28.33 (11.61 - 45.05) |
| United Mexican States | High body-mass index | -16.22 (-26.22 - -6.22) |
| United Mexican States | High fasting plasma glucose | 9.33 (1.96 - 16.70) |
| United Mexican States | Low physical activity | 2.63 (0.84 - 4.41) |
| United Mexican States | Secondhand smoke | 2.06 (0.55 - 3.58) |
| United Mexican States | Smoking | 1.85 (1.32 - 2.38) |
| United Republic of Tanzania | Alcohol use | 9.14 (5.85 - 12.43) |
| United Republic of Tanzania | Diet high in red meat | 35.48 (13.36 - 57.61) |
| United Republic of Tanzania | High body-mass index | -13.50 (-21.63 - -5.36) |
| United Republic of Tanzania | High fasting plasma glucose | 3.34 (0.58 - 6.09) |
| United Republic of Tanzania | Low physical activity | 0.87 (0.09 - 1.64) |
| United Republic of Tanzania | Secondhand smoke | 2.53 (0.70 - 4.35) |
| United Republic of Tanzania | Smoking | 4.58 (3.03 - 6.13) |
| United States Virgin Islands | Alcohol use | 15.91 (6.00 - 25.81) |
| United States Virgin Islands | Diet high in red meat | 47.76 (15.96 - 79.56) |
| United States Virgin Islands | High body-mass index | -26.62 (-43.87 - -9.37) |
| United States Virgin Islands | High fasting plasma glucose | 14.51 (2.82 - 26.19) |
| United States Virgin Islands | Low physical activity | 4.65 (1.28 - 8.02) |
| United States Virgin Islands | Secondhand smoke | 1.99 (0.46 - 3.52) |
| United States Virgin Islands | Smoking | 4.82 (2.93 - 6.71) |
| United States of America | Alcohol use | 16.55 (13.17 - 19.93) |
| United States of America | Diet high in red meat | 26.71 (11.32 - 42.10) |
| United States of America | High body-mass index | -14.20 (-22.54 - -5.86) |
| United States of America | High fasting plasma glucose | 6.43 (1.42 - 11.44) |
| United States of America | Low physical activity | 2.94 (1.19 - 4.69) |
| United States of America | Secondhand smoke | 1.27 (0.38 - 2.16) |
| United States of America | Smoking | 7.45 (6.01 - 8.88) |

DALYs = disability-adjusted life years, AAPC = average annual percent change, UI = uncertainty intervals

# Table S5 Age-standardized DALYs rates for cervical cancer attributable to 2 risk factors in 2021.

| Locations | Risk factor | Cervical cancer, per 100,000 |
| --- | --- | --- |
| Global | Smoking | 7.69 (5.90 - 9.47) |
| Global | Unsafe sex | 136.78 (129.92 - 143.64) |
| High SDI | Smoking | 9.67 (7.67 - 11.67) |
| High SDI | Unsafe sex | 50.14 (48.92 - 51.37) |
| High-middle SDI | Smoking | 11.63 (9.18 - 14.08) |
| High-middle SDI | Unsafe sex | 89.34 (83.20 - 95.49) |
| Middle SDI | Smoking | 5.59 (4.11 - 7.07) |
| Middle SDI | Unsafe sex | 121.80 (115.33 - 128.28) |
| Low-middle SDI | Smoking | 6.07 (4.26 - 7.89) |
| Low-middle SDI | Unsafe sex | 178.37 (166.36 - 190.38) |
| Low SDI | Smoking | 8.44 (5.84 - 11.05) |
| Low SDI | Unsafe sex | 285.63 (257.12 - 314.14) |
| Afghanistan | Smoking | 9.13 (3.80 - 14.46) |
| Afghanistan | Unsafe sex | 186.89 (128.23 - 245.55) |
| Albania | Smoking | 4.79 (2.60 - 6.98) |
| Albania | Unsafe sex | 49.79 (38.39 - 61.18) |
| Algeria | Smoking | 1.06 (0.44 - 1.68) |
| Algeria | Unsafe sex | 71.24 (54.50 - 87.98) |
| American Samoa | Smoking | 41.62 (25.34 - 57.89) |
| American Samoa | Unsafe sex | 198.97 (153.97 - 243.96) |
| Andorra | Smoking | 6.11 (3.70 - 8.53) |
| Andorra | Unsafe sex | 22.50 (16.28 - 28.73) |
| Angola | Smoking | 19.58 (9.18 - 29.98) |
| Angola | Unsafe sex | 398.54 (290.16 - 506.91) |
| Antigua and Barbuda | Smoking | 12.40 (7.51 - 17.29) |
| Antigua and Barbuda | Unsafe sex | 141.35 (129.46 - 153.24) |
| Argentina | Smoking | 52.36 (39.24 - 65.47) |
| Argentina | Unsafe sex | 228.23 (204.22 - 252.24) |
| Armenia | Smoking | 2.42 (1.27 - 3.56) |
| Armenia | Unsafe sex | 65.57 (60.24 - 70.91) |
| Australia | Smoking | 9.04 (6.50 - 11.58) |
| Australia | Unsafe sex | 39.75 (34.87 - 44.64) |
| Austria | Smoking | 9.73 (7.29 - 12.18) |
| Austria | Unsafe sex | 32.15 (28.08 - 36.22) |
| Azerbaijan | Smoking | 1.84 (0.91 - 2.77) |
| Azerbaijan | Unsafe sex | 65.92 (56.68 - 75.17) |
| Bahamas | Smoking | 15.73 (9.66 - 21.80) |
| Bahamas | Unsafe sex | 246.67 (210.41 - 282.92) |
| Bahrain | Smoking | 1.36 (0.61 - 2.12) |
| Bahrain | Unsafe sex | 26.24 (20.45 - 32.03) |
| Bangladesh | Smoking | 2.74 (1.30 - 4.18) |
| Bangladesh | Unsafe sex | 131.66 (97.80 - 165.52) |
| Barbados | Smoking | 12.35 (7.52 - 17.18) |
| Barbados | Unsafe sex | 209.74 (178.22 - 241.26) |
| Belarus | Smoking | 19.23 (12.96 - 25.50) |
| Belarus | Unsafe sex | 114.54 (94.41 - 134.66) |
| Belgium | Smoking | 11.21 (8.39 - 14.03) |
| Belgium | Unsafe sex | 40.38 (35.19 - 45.58) |
| Belize | Smoking | 19.69 (12.15 - 27.23) |
| Belize | Unsafe sex | 338.13 (303.95 - 372.32) |
| Benin | Smoking | 3.52 (1.67 - 5.37) |
| Benin | Unsafe sex | 252.90 (191.81 - 313.99) |
| Bermuda | Smoking | 7.66 (4.97 - 10.35) |
| Bermuda | Unsafe sex | 55.75 (46.60 - 64.90) |
| Bhutan | Smoking | 7.72 (3.21 - 12.24) |
| Bhutan | Unsafe sex | 146.06 (106.60 - 185.52) |
| Bolivia (Plurinational State of) | Smoking | 13.88 (6.82 - 20.94) |
| Bolivia (Plurinational State of) | Unsafe sex | 295.42 (219.99 - 370.84) |
| Bosnia and Herzegovina | Smoking | 27.56 (18.97 - 36.15) |
| Bosnia and Herzegovina | Unsafe sex | 81.41 (65.55 - 97.26) |
| Botswana | Smoking | 12.89 (6.20 - 19.58) |
| Botswana | Unsafe sex | 256.70 (176.47 - 336.94) |
| Brazil | Smoking | 21.47 (15.57 - 27.37) |
| Brazil | Unsafe sex | 184.29 (177.63 - 190.95) |
| Brunei Darussalam | Smoking | 11.42 (6.34 - 16.49) |
| Brunei Darussalam | Unsafe sex | 141.30 (111.62 - 170.98) |
| Bulgaria | Smoking | 57.19 (43.55 - 70.84) |
| Bulgaria | Unsafe sex | 164.42 (142.75 - 186.10) |
| Burkina Faso | Smoking | 3.29 (1.67 - 4.90) |
| Burkina Faso | Unsafe sex | 307.28 (233.61 - 380.96) |
| Burundi | Smoking | 14.85 (6.82 - 22.87) |
| Burundi | Unsafe sex | 427.24 (322.82 - 531.65) |
| Cabo Verde | Smoking | 3.94 (1.84 - 6.04) |
| Cabo Verde | Unsafe sex | 131.37 (100.51 - 162.22) |
| Cambodia | Smoking | 8.02 (3.82 - 12.22) |
| Cambodia | Unsafe sex | 171.67 (127.82 - 215.52) |
| Cameroon | Smoking | 3.36 (1.60 - 5.12) |
| Cameroon | Unsafe sex | 325.33 (241.55 - 409.10) |
| Canada | Smoking | 11.54 (8.20 - 14.88) |
| Canada | Unsafe sex | 52.18 (45.76 - 58.60) |
| Central African Republic | Smoking | 13.43 (5.59 - 21.27) |
| Central African Republic | Unsafe sex | 604.81 (434.25 - 775.36) |
| Chad | Smoking | 6.23 (2.69 - 9.78) |
| Chad | Unsafe sex | 367.14 (274.50 - 459.79) |
| Chile | Smoking | 39.02 (30.01 - 48.03) |
| Chile | Unsafe sex | 132.68 (118.33 - 147.02) |
| China | Smoking | 2.64 (1.46 - 3.81) |
| China | Unsafe sex | 78.49 (65.97 - 91.01) |
| Colombia | Smoking | 15.32 (9.76 - 20.87) |
| Colombia | Unsafe sex | 170.60 (145.62 - 195.58) |
| Comoros | Smoking | 10.62 (4.84 - 16.40) |
| Comoros | Unsafe sex | 444.35 (331.72 - 556.97) |
| Congo | Smoking | 10.37 (4.65 - 16.10) |
| Congo | Unsafe sex | 545.07 (381.81 - 708.32) |
| Cook Islands | Smoking | 10.71 (6.55 - 14.87) |
| Cook Islands | Unsafe sex | 55.87 (41.28 - 70.47) |
| Costa Rica | Smoking | 12.35 (7.86 - 16.85) |
| Costa Rica | Unsafe sex | 136.89 (118.48 - 155.30) |
| Croatia | Smoking | 17.75 (13.03 - 22.47) |
| Croatia | Unsafe sex | 54.28 (46.56 - 61.99) |
| Cuba | Smoking | 21.55 (13.69 - 29.41) |
| Cuba | Unsafe sex | 141.95 (121.40 - 162.50) |
| Cyprus | Smoking | 7.18 (4.72 - 9.64) |
| Cyprus | Unsafe sex | 28.26 (22.38 - 34.14) |
| Czechia | Smoking | 12.86 (9.27 - 16.46) |
| Czechia | Unsafe sex | 52.63 (45.40 - 59.86) |
| C么te d'Ivoire | Smoking | 3.13 (1.31 - 4.95) |
| C么te d'Ivoire | Unsafe sex | 153.37 (111.92 - 194.81) |
| Democratic People's Republic of Korea | Smoking | 7.65 (3.40 - 11.90) |
| Democratic People's Republic of Korea | Unsafe sex | 167.19 (120.61 - 213.76) |
| Democratic Republic of the Congo | Smoking | 8.25 (3.51 - 12.98) |
| Democratic Republic of the Congo | Unsafe sex | 406.76 (294.11 - 519.41) |
| Denmark | Smoking | 11.88 (8.76 - 15.00) |
| Denmark | Unsafe sex | 43.40 (38.00 - 48.81) |
| Djibouti | Smoking | 13.67 (4.30 - 23.03) |
| Djibouti | Unsafe sex | 368.07 (254.19 - 481.95) |
| Dominica | Smoking | 16.44 (8.93 - 23.96) |
| Dominica | Unsafe sex | 268.47 (214.56 - 322.39) |
| Dominican Republic | Smoking | 24.75 (15.00 - 34.51) |
| Dominican Republic | Unsafe sex | 213.74 (167.33 - 260.14) |
| Ecuador | Smoking | 9.71 (5.75 - 13.66) |
| Ecuador | Unsafe sex | 190.51 (155.70 - 225.32) |
| Egypt | Smoking | 0.29 (0.12 - 0.46) |
| Egypt | Unsafe sex | 25.89 (20.08 - 31.70) |
| El Salvador | Smoking | 17.85 (10.54 - 25.16) |
| El Salvador | Unsafe sex | 278.75 (230.78 - 326.72) |
| Equatorial Guinea | Smoking | 7.50 (3.06 - 11.94) |
| Equatorial Guinea | Unsafe sex | 355.26 (236.21 - 474.32) |
| Eritrea | Smoking | 3.46 (1.32 - 5.59) |
| Eritrea | Unsafe sex | 625.42 (445.28 - 805.55) |
| Estonia | Smoking | 15.90 (11.41 - 20.38) |
| Estonia | Unsafe sex | 74.89 (64.20 - 85.57) |
| Eswatini | Smoking | 8.89 (2.85 - 14.94) |
| Eswatini | Unsafe sex | 568.98 (364.24 - 773.71) |
| Ethiopia | Smoking | 3.86 (1.85 - 5.86) |
| Ethiopia | Unsafe sex | 258.81 (199.19 - 318.43) |
| Fiji | Smoking | 46.77 (27.22 - 66.32) |
| Fiji | Unsafe sex | 396.52 (298.37 - 494.67) |
| Finland | Smoking | 5.85 (4.22 - 7.48) |
| Finland | Unsafe sex | 26.37 (22.82 - 29.92) |
| France | Smoking | 11.51 (8.69 - 14.34) |
| France | Unsafe sex | 39.46 (34.35 - 44.56) |
| Gabon | Smoking | 9.76 (4.13 - 15.38) |
| Gabon | Unsafe sex | 330.78 (231.58 - 429.99) |
| Gambia | Smoking | 2.49 (1.15 - 3.84) |
| Gambia | Unsafe sex | 314.53 (236.48 - 392.58) |
| Georgia | Smoking | 10.99 (6.79 - 15.19) |
| Georgia | Unsafe sex | 119.44 (109.41 - 129.46) |
| Germany | Smoking | 12.59 (9.30 - 15.89) |
| Germany | Unsafe sex | 47.90 (41.98 - 53.82) |
| Ghana | Smoking | 5.95 (2.61 - 9.30) |
| Ghana | Unsafe sex | 294.19 (222.69 - 365.70) |
| Greece | Smoking | 14.28 (11.26 - 17.29) |
| Greece | Unsafe sex | 42.78 (39.13 - 46.43) |
| Greenland | Smoking | 60.01 (39.74 - 80.29) |
| Greenland | Unsafe sex | 182.43 (139.88 - 224.97) |
| Grenada | Smoking | 20.99 (12.57 - 29.41) |
| Grenada | Unsafe sex | 314.56 (267.52 - 361.61) |
| Guam | Smoking | 19.46 (13.51 - 25.42) |
| Guam | Unsafe sex | 99.90 (83.86 - 115.95) |
| Guatemala | Smoking | 12.13 (7.01 - 17.25) |
| Guatemala | Unsafe sex | 254.51 (224.35 - 284.67) |
| Guinea | Smoking | 8.57 (4.16 - 12.98) |
| Guinea | Unsafe sex | 554.60 (419.29 - 689.91) |
| Guinea-Bissau | Smoking | 7.96 (3.40 - 12.51) |
| Guinea-Bissau | Unsafe sex | 590.08 (442.73 - 737.43) |
| Guyana | Smoking | 16.83 (9.75 - 23.90) |
| Guyana | Unsafe sex | 333.92 (264.82 - 403.02) |
| Haiti | Smoking | 27.56 (14.89 - 40.24) |
| Haiti | Unsafe sex | 574.34 (441.84 - 706.85) |
| Honduras | Smoking | 15.28 (7.43 - 23.12) |
| Honduras | Unsafe sex | 251.51 (179.36 - 323.67) |
| Hungary | Smoking | 21.34 (15.38 - 27.31) |
| Hungary | Unsafe sex | 82.71 (70.94 - 94.49) |
| Iceland | Smoking | 7.68 (5.37 - 9.99) |
| Iceland | Unsafe sex | 33.60 (28.90 - 38.31) |
| India | Smoking | 3.47 (1.62 - 5.31) |
| India | Unsafe sex | 159.50 (143.91 - 175.08) |
| Indonesia | Smoking | 4.28 (2.22 - 6.34) |
| Indonesia | Unsafe sex | 135.18 (112.75 - 157.61) |
| Iran (Islamic Republic of) | Smoking | 0.90 (0.52 - 1.27) |
| Iran (Islamic Republic of) | Unsafe sex | 18.41 (16.94 - 19.88) |
| Iraq | Smoking | 1.20 (0.52 - 1.88) |
| Iraq | Unsafe sex | 28.11 (20.29 - 35.93) |
| Ireland | Smoking | 8.49 (6.15 - 10.82) |
| Ireland | Unsafe sex | 40.14 (34.67 - 45.60) |
| Israel | Smoking | 4.93 (3.44 - 6.41) |
| Israel | Unsafe sex | 25.00 (21.69 - 28.30) |
| Italy | Smoking | 7.87 (6.06 - 9.67) |
| Italy | Unsafe sex | 33.55 (32.01 - 35.10) |
| Jamaica | Smoking | 24.09 (14.28 - 33.91) |
| Jamaica | Unsafe sex | 264.84 (214.44 - 315.23) |
| Japan | Smoking | 8.86 (6.17 - 11.56) |
| Japan | Unsafe sex | 62.27 (60.69 - 63.85) |
| Jordan | Smoking | 2.09 (1.15 - 3.03) |
| Jordan | Unsafe sex | 21.11 (15.91 - 26.31) |
| Kazakhstan | Smoking | 12.00 (8.02 - 15.98) |
| Kazakhstan | Unsafe sex | 147.16 (134.40 - 159.92) |
| Kenya | Smoking | 3.33 (1.44 - 5.21) |
| Kenya | Unsafe sex | 202.71 (163.63 - 241.80) |
| Kiribati | Smoking | 206.42 (132.28 - 280.55) |
| Kiribati | Unsafe sex | 817.85 (606.74 - 1028.96) |
| Kuwait | Smoking | 0.53 (0.26 - 0.80) |
| Kuwait | Unsafe sex | 11.69 (9.78 - 13.61) |
| Kyrgyzstan | Smoking | 10.41 (5.94 - 14.89) |
| Kyrgyzstan | Unsafe sex | 152.82 (129.62 - 176.02) |
| Lao People's Democratic Republic | Smoking | 10.61 (5.46 - 15.76) |
| Lao People's Democratic Republic | Unsafe sex | 165.22 (124.29 - 206.14) |
| Latvia | Smoking | 15.17 (10.54 - 19.80) |
| Latvia | Unsafe sex | 76.71 (64.84 - 88.58) |
| Lebanon | Smoking | 6.49 (4.12 - 8.87) |
| Lebanon | Unsafe sex | 26.33 (20.41 - 32.25) |
| Lesotho | Smoking | 8.39 (3.08 - 13.70) |
| Lesotho | Unsafe sex | 678.80 (449.64 - 907.97) |
| Liberia | Smoking | 5.78 (2.67 - 8.89) |
| Liberia | Unsafe sex | 336.29 (253.52 - 419.07) |
| Libya | Smoking | 1.29 (0.49 - 2.09) |
| Libya | Unsafe sex | 113.18 (85.33 - 141.02) |
| Lithuania | Smoking | 19.70 (13.88 - 25.53) |
| Lithuania | Unsafe sex | 95.31 (80.94 - 109.68) |
| Luxembourg | Smoking | 4.69 (3.40 - 5.97) |
| Luxembourg | Unsafe sex | 21.50 (19.52 - 23.49) |
| Madagascar | Smoking | 9.61 (4.27 - 14.96) |
| Madagascar | Unsafe sex | 464.05 (342.39 - 585.71) |
| Malawi | Smoking | 9.96 (4.60 - 15.31) |
| Malawi | Unsafe sex | 565.35 (432.03 - 698.66) |
| Malaysia | Smoking | 2.79 (1.41 - 4.17) |
| Malaysia | Unsafe sex | 129.09 (100.14 - 158.03) |
| Maldives | Smoking | 2.00 (1.02 - 2.97) |
| Maldives | Unsafe sex | 36.82 (28.57 - 45.07) |
| Mali | Smoking | 4.71 (2.20 - 7.22) |
| Mali | Unsafe sex | 334.60 (259.10 - 410.10) |
| Malta | Smoking | 8.06 (5.70 - 10.41) |
| Malta | Unsafe sex | 29.74 (25.25 - 34.23) |
| Marshall Islands | Smoking | 43.17 (20.50 - 65.83) |
| Marshall Islands | Unsafe sex | 422.76 (301.36 - 544.16) |
| Mauritania | Smoking | 13.14 (5.98 - 20.30) |
| Mauritania | Unsafe sex | 246.74 (180.65 - 312.83) |
| Mauritius | Smoking | 4.86 (2.76 - 6.97) |
| Mauritius | Unsafe sex | 106.25 (96.28 - 116.21) |
| Mexico | Smoking | 8.08 (5.56 - 10.59) |
| Mexico | Unsafe sex | 150.53 (136.79 - 164.27) |
| Micronesia (Federated States of) | Smoking | 78.51 (48.65 - 108.37) |
| Micronesia (Federated States of) | Unsafe sex | 347.39 (255.77 - 439.01) |
| Monaco | Smoking | 15.66 (9.61 - 21.72) |
| Monaco | Unsafe sex | 58.57 (43.66 - 73.48) |
| Mongolia | Smoking | 10.83 (6.58 - 15.08) |
| Mongolia | Unsafe sex | 161.68 (129.79 - 193.56) |
| Montenegro | Smoking | 28.82 (21.55 - 36.09) |
| Montenegro | Unsafe sex | 78.07 (65.56 - 90.58) |
| Morocco | Smoking | 1.18 (0.48 - 1.89) |
| Morocco | Unsafe sex | 102.92 (72.80 - 133.04) |
| Mozambique | Smoking | 18.21 (7.01 - 29.41) |
| Mozambique | Unsafe sex | 592.45 (398.01 - 786.88) |
| Myanmar | Smoking | 6.36 (2.98 - 9.75) |
| Myanmar | Unsafe sex | 140.85 (104.52 - 177.17) |
| Namibia | Smoking | 11.99 (6.04 - 17.93) |
| Namibia | Unsafe sex | 263.51 (187.77 - 339.25) |
| Nauru | Smoking | 139.84 (87.94 - 191.74) |
| Nauru | Unsafe sex | 479.97 (345.98 - 613.97) |
| Nepal | Smoking | 13.63 (7.91 - 19.36) |
| Nepal | Unsafe sex | 164.06 (123.81 - 204.31) |
| Netherlands | Smoking | 7.81 (5.81 - 9.82) |
| Netherlands | Unsafe sex | 32.60 (28.51 - 36.68) |
| New Zealand | Smoking | 9.18 (7.03 - 11.33) |
| New Zealand | Unsafe sex | 38.75 (34.85 - 42.65) |
| Nicaragua | Smoking | 16.70 (9.47 - 23.92) |
| Nicaragua | Unsafe sex | 204.60 (167.22 - 241.99) |
| Niger | Smoking | 2.91 (1.30 - 4.51) |
| Niger | Unsafe sex | 298.64 (220.86 - 376.43) |
| Nigeria | Smoking | 1.86 (0.85 - 2.86) |
| Nigeria | Unsafe sex | 190.28 (147.55 - 233.01) |
| Niue | Smoking | 29.95 (17.41 - 42.48) |
| Niue | Unsafe sex | 210.35 (162.21 - 258.49) |
| North Macedonia | Smoking | 29.25 (20.91 - 37.60) |
| North Macedonia | Unsafe sex | 86.67 (70.30 - 103.05) |
| Northern Mariana Islands | Smoking | 35.35 (19.96 - 50.74) |
| Northern Mariana Islands | Unsafe sex | 249.28 (196.68 - 301.88) |
| Norway | Smoking | 10.41 (7.78 - 13.03) |
| Norway | Unsafe sex | 45.58 (43.05 - 48.12) |
| Oman | Smoking | 0.53 (0.27 - 0.80) |
| Oman | Unsafe sex | 20.87 (16.21 - 25.54) |
| Pakistan | Smoking | 2.39 (1.18 - 3.59) |
| Pakistan | Unsafe sex | 93.90 (76.50 - 111.30) |
| Palau | Smoking | 34.38 (20.15 - 48.61) |
| Palau | Unsafe sex | 436.08 (342.34 - 529.81) |
| Palestine | Smoking | 0.42 (0.20 - 0.64) |
| Palestine | Unsafe sex | 10.71 (8.35 - 13.08) |
| Panama | Smoking | 8.49 (4.85 - 12.13) |
| Panama | Unsafe sex | 187.12 (159.09 - 215.14) |
| Papua New Guinea | Smoking | 39.77 (23.62 - 55.93) |
| Papua New Guinea | Unsafe sex | 270.69 (187.47 - 353.90) |
| Paraguay | Smoking | 32.02 (19.35 - 44.70) |
| Paraguay | Unsafe sex | 302.25 (238.12 - 366.39) |
| Peru | Smoking | 9.26 (5.26 - 13.26) |
| Peru | Unsafe sex | 208.01 (161.65 - 254.38) |
| Philippines | Smoking | 8.20 (5.32 - 11.08) |
| Philippines | Unsafe sex | 141.20 (122.06 - 160.34) |
| Poland | Smoking | 16.17 (12.25 - 20.09) |
| Poland | Unsafe sex | 63.65 (59.14 - 68.16) |
| Portugal | Smoking | 13.93 (10.38 - 17.48) |
| Portugal | Unsafe sex | 57.76 (50.60 - 64.92) |
| Puerto Rico | Smoking | 8.47 (5.55 - 11.38) |
| Puerto Rico | Unsafe sex | 72.99 (61.49 - 84.48) |
| Qatar | Smoking | 0.41 (0.19 - 0.63) |
| Qatar | Unsafe sex | 14.88 (11.36 - 18.40) |
| Republic of Korea | Smoking | 2.95 (1.76 - 4.14) |
| Republic of Korea | Unsafe sex | 44.27 (36.12 - 52.42) |
| Republic of Moldova | Smoking | 11.61 (7.21 - 16.00) |
| Republic of Moldova | Unsafe sex | 142.10 (128.19 - 156.02) |
| Romania | Smoking | 49.39 (35.69 - 63.09) |
| Romania | Unsafe sex | 181.63 (156.90 - 206.36) |
| Russian Federation | Smoking | 33.33 (25.44 - 41.22) |
| Russian Federation | Unsafe sex | 172.29 (161.83 - 182.74) |
| Rwanda | Smoking | 22.22 (10.72 - 33.73) |
| Rwanda | Unsafe sex | 379.11 (279.19 - 479.03) |
| Saint Kitts and Nevis | Smoking | 6.61 (3.11 - 10.11) |
| Saint Kitts and Nevis | Unsafe sex | 170.11 (143.11 - 197.12) |
| Saint Lucia | Smoking | 16.74 (9.84 - 23.64) |
| Saint Lucia | Unsafe sex | 248.64 (216.16 - 281.11) |
| Saint Vincent and the Grenadines | Smoking | 23.20 (13.67 - 32.74) |
| Saint Vincent and the Grenadines | Unsafe sex | 424.61 (378.41 - 470.81) |
| Samoa | Smoking | 39.69 (23.13 - 56.26) |
| Samoa | Unsafe sex | 275.75 (204.96 - 346.55) |
| San Marino | Smoking | 3.82 (2.27 - 5.37) |
| San Marino | Unsafe sex | 15.26 (10.53 - 19.99) |
| Sao Tome and Principe | Smoking | 5.45 (2.38 - 8.52) |
| Sao Tome and Principe | Unsafe sex | 383.83 (288.74 - 478.92) |
| Saudi Arabia | Smoking | 0.48 (0.18 - 0.78) |
| Saudi Arabia | Unsafe sex | 16.70 (12.07 - 21.33) |
| Senegal | Smoking | 2.66 (0.99 - 4.34) |
| Senegal | Unsafe sex | 296.28 (223.17 - 369.39) |
| Serbia | Smoking | 44.37 (31.25 - 57.48) |
| Serbia | Unsafe sex | 123.24 (98.88 - 147.60) |
| Seychelles | Smoking | 13.15 (6.93 - 19.38) |
| Seychelles | Unsafe sex | 243.38 (199.18 - 287.58) |
| Sierra Leone | Smoking | 11.34 (5.62 - 17.06) |
| Sierra Leone | Unsafe sex | 336.83 (256.01 - 417.65) |
| Singapore | Smoking | 2.57 (1.38 - 3.76) |
| Singapore | Unsafe sex | 29.12 (25.04 - 33.19) |
| Slovakia | Smoking | 20.91 (13.72 - 28.10) |
| Slovakia | Unsafe sex | 89.52 (71.45 - 107.59) |
| Slovenia | Smoking | 11.58 (8.24 - 14.93) |
| Slovenia | Unsafe sex | 40.01 (33.29 - 46.73) |
| Solomon Islands | Smoking | 56.17 (34.56 - 77.79) |
| Solomon Islands | Unsafe sex | 408.12 (296.82 - 519.42) |
| Somalia | Smoking | 14.26 (4.96 - 23.55) |
| Somalia | Unsafe sex | 649.34 (456.68 - 842.00) |
| South Africa | Smoking | 38.07 (24.87 - 51.27) |
| South Africa | Unsafe sex | 446.09 (403.69 - 488.49) |
| South Sudan | Smoking | 10.26 (4.50 - 16.03) |
| South Sudan | Unsafe sex | 501.22 (368.08 - 634.36) |
| Spain | Smoking | 9.47 (7.10 - 11.84) |
| Spain | Unsafe sex | 33.99 (29.61 - 38.36) |
| Sri Lanka | Smoking | 0.88 (0.41 - 1.36) |
| Sri Lanka | Unsafe sex | 45.85 (32.33 - 59.36) |
| Sudan | Smoking | 1.24 (0.55 - 1.92) |
| Sudan | Unsafe sex | 50.10 (35.27 - 64.93) |
| Suriname | Smoking | 34.79 (19.52 - 50.07) |
| Suriname | Unsafe sex | 335.94 (268.21 - 403.67) |
| Sweden | Smoking | 7.86 (5.78 - 9.94) |
| Sweden | Unsafe sex | 34.59 (30.36 - 38.82) |
| Switzerland | Smoking | 6.05 (4.35 - 7.76) |
| Switzerland | Unsafe sex | 24.73 (21.48 - 27.97) |
| Syrian Arab Republic | Smoking | 1.29 (0.61 - 1.97) |
| Syrian Arab Republic | Unsafe sex | 21.67 (16.76 - 26.58) |
| Taiwan (Province of China) | Smoking | 2.53 (1.40 - 3.66) |
| Taiwan (Province of China) | Unsafe sex | 52.81 (45.90 - 59.71) |
| Tajikistan | Smoking | 1.54 (0.83 - 2.26) |
| Tajikistan | Unsafe sex | 61.82 (46.45 - 77.19) |
| Thailand | Smoking | 4.55 (2.35 - 6.74) |
| Thailand | Unsafe sex | 157.53 (123.51 - 191.56) |
| Timor-Leste | Smoking | 5.14 (2.56 - 7.72) |
| Timor-Leste | Unsafe sex | 127.54 (93.00 - 162.09) |
| Togo | Smoking | 4.38 (2.00 - 6.76) |
| Togo | Unsafe sex | 334.23 (251.80 - 416.66) |
| Tokelau | Smoking | 37.26 (19.84 - 54.67) |
| Tokelau | Unsafe sex | 282.07 (215.71 - 348.42) |
| Tonga | Smoking | 30.45 (17.21 - 43.69) |
| Tonga | Unsafe sex | 295.79 (218.35 - 373.23) |
| Trinidad and Tobago | Smoking | 22.41 (13.98 - 30.84) |
| Trinidad and Tobago | Unsafe sex | 256.56 (214.33 - 298.78) |
| Tunisia | Smoking | 1.35 (0.58 - 2.12) |
| Tunisia | Unsafe sex | 46.80 (34.97 - 58.62) |
| Turkey | Smoking | 4.97 (3.10 - 6.83) |
| Turkey | Unsafe sex | 25.93 (20.17 - 31.69) |
| Turkmenistan | Smoking | 9.17 (4.80 - 13.55) |
| Turkmenistan | Unsafe sex | 156.88 (131.22 - 182.53) |
| Tuvalu | Smoking | 53.67 (30.85 - 76.49) |
| Tuvalu | Unsafe sex | 322.98 (238.96 - 407.00) |
| Uganda | Smoking | 10.63 (5.23 - 16.03) |
| Uganda | Unsafe sex | 390.70 (297.96 - 483.45) |
| Ukraine | Smoking | 9.15 (5.58 - 12.72) |
| Ukraine | Unsafe sex | 61.28 (44.81 - 77.76) |
| United Arab Emirates | Smoking | 2.15 (1.09 - 3.20) |
| United Arab Emirates | Unsafe sex | 45.86 (35.73 - 55.98) |
| United Kingdom | Smoking | 10.75 (8.31 - 13.20) |
| United Kingdom | Unsafe sex | 49.69 (48.34 - 51.05) |
| United Republic of Tanzania | Smoking | 32.44 (19.11 - 45.76) |
| United Republic of Tanzania | Unsafe sex | 350.12 (265.90 - 434.34) |
| United States Virgin Islands | Smoking | 9.75 (4.99 - 14.52) |
| United States Virgin Islands | Unsafe sex | 110.94 (83.27 - 138.62) |
| United States of America | Smoking | 13.28 (10.28 - 16.28) |
| United States of America | Unsafe sex | 59.26 (57.52 - 61.00) |
| Uruguay | Smoking | 46.22 (34.97 - 57.47) |
| Uruguay | Unsafe sex | 193.55 (171.27 - 215.82) |
| Uzbekistan | Smoking | 4.51 (2.35 - 6.67) |
| Uzbekistan | Unsafe sex | 132.29 (110.85 - 153.73) |
| Vanuatu | Smoking | 7.57 (3.49 - 11.65) |
| Vanuatu | Unsafe sex | 286.04 (216.59 - 355.48) |
| Venezuela (Bolivarian Republic of) | Smoking | 37.75 (22.83 - 52.66) |
| Venezuela (Bolivarian Republic of) | Unsafe sex | 366.75 (307.13 - 426.37) |
| Viet Nam | Smoking | 2.25 (1.00 - 3.49) |
| Viet Nam | Unsafe sex | 104.47 (77.25 - 131.69) |
| Yemen | Smoking | 6.37 (2.97 - 9.76) |
| Yemen | Unsafe sex | 53.09 (36.83 - 69.35) |
| Zambia | Smoking | 8.99 (2.98 - 15.00) |
| Zambia | Unsafe sex | 535.19 (352.70 - 717.67) |
| Zimbabwe | Smoking | 11.58 (4.72 - 18.45) |
| Zimbabwe | Unsafe sex | 720.53 (526.02 - 915.03) |

DALYs = disability-adjusted life years, AAPC = average annual percent change, UI = uncertainty intervals

# Table S6 Age-standardized DALYs rates for uterine cancer attributable to risk factors in 2021.

| Locations | Risk factor | Uterine cancer, per 100,000 |
| --- | --- | --- |
| Global | High body-mass index | 3.83 (3.14 - 4.53) |
| High SDI | High body-mass index | 4.66 (3.89 - 5.42) |
| High-middle SDI | High body-mass index | 5.18 (4.22 - 6.14) |
| Middle SDI | High body-mass index | 3.81 (3.06 - 4.56) |
| Low-middle SDI | High body-mass index | 2.86 (2.31 - 3.41) |
| Low SDI | High body-mass index | 2.28 (1.74 - 2.82) |
| Afghanistan | High body-mass index | 6.97 (3.58 - 10.36) |
| Albania | High body-mass index | 3.92 (2.38 - 5.45) |
| Algeria | High body-mass index | 1.31 (0.89 - 1.74) |
| American Samoa | High body-mass index | 25.13 (12.55 - 37.71) |
| Andorra | High body-mass index | 1.78 (1.02 - 2.53) |
| Angola | High body-mass index | 2.38 (1.21 - 3.55) |
| Antigua and Barbuda | High body-mass index | 11.92 (9.75 - 14.09) |
| Argentina | High body-mass index | 3.73 (2.94 - 4.52) |
| Armenia | High body-mass index | 7.55 (5.70 - 9.40) |
| Australia | High body-mass index | 3.34 (2.56 - 4.11) |
| Austria | High body-mass index | 2.42 (1.78 - 3.05) |
| Azerbaijan | High body-mass index | 6.41 (4.34 - 8.48) |
| Bahamas | High body-mass index | 24.28 (19.08 - 29.48) |
| Bahrain | High body-mass index | 5.69 (3.70 - 7.68) |
| Bangladesh | High body-mass index | 1.00 (0.45 - 1.54) |
| Barbados | High body-mass index | 20.52 (15.94 - 25.09) |
| Belarus | High body-mass index | 7.99 (5.61 - 10.36) |
| Belgium | High body-mass index | 3.17 (2.36 - 3.98) |
| Belize | High body-mass index | 18.63 (15.32 - 21.95) |
| Benin | High body-mass index | 2.29 (1.37 - 3.21) |
| Bermuda | High body-mass index | 10.00 (7.66 - 12.34) |
| Bhutan | High body-mass index | 1.69 (0.69 - 2.69) |
| Bolivia (Plurinational State of) | High body-mass index | 10.00 (6.08 - 13.92) |
| Bosnia and Herzegovina | High body-mass index | 4.27 (2.87 - 5.67) |
| Botswana | High body-mass index | 3.52 (1.83 - 5.21) |
| Brazil | High body-mass index | 4.49 (3.63 - 5.35) |
| Brunei Darussalam | High body-mass index | 7.07 (4.59 - 9.56) |
| Bulgaria | High body-mass index | 16.41 (12.55 - 20.27) |
| Burkina Faso | High body-mass index | 1.18 (0.62 - 1.74) |
| Burundi | High body-mass index | 1.10 (0.56 - 1.64) |
| Cabo Verde | High body-mass index | 2.35 (1.13 - 3.57) |
| Cambodia | High body-mass index | 3.41 (1.82 - 5.01) |
| Cameroon | High body-mass index | 3.29 (1.92 - 4.66) |
| Canada | High body-mass index | 4.20 (3.20 - 5.19) |
| Central African Republic | High body-mass index | 2.78 (1.33 - 4.23) |
| Chad | High body-mass index | 1.16 (0.56 - 1.76) |
| Chile | High body-mass index | 2.70 (2.15 - 3.25) |
| China | High body-mass index | 3.50 (2.51 - 4.49) |
| Colombia | High body-mass index | 3.90 (2.85 - 4.96) |
| Comoros | High body-mass index | 4.07 (2.53 - 5.61) |
| Congo | High body-mass index | 5.84 (3.24 - 8.43) |
| Cook Islands | High body-mass index | 5.90 (3.88 - 7.93) |
| Costa Rica | High body-mass index | 6.68 (5.02 - 8.34) |
| Croatia | High body-mass index | 6.10 (4.47 - 7.72) |
| Cuba | High body-mass index | 17.99 (13.46 - 22.53) |
| Cyprus | High body-mass index | 2.48 (1.31 - 3.64) |
| Czechia | High body-mass index | 6.59 (4.99 - 8.19) |
| C么te d'Ivoire | High body-mass index | 2.15 (1.31 - 2.99) |
| Democratic People's Republic of Korea | High body-mass index | 2.35 (1.33 - 3.38) |
| Democratic Republic of the Congo | High body-mass index | 1.91 (0.94 - 2.88) |
| Denmark | High body-mass index | 2.92 (2.17 - 3.66) |
| Djibouti | High body-mass index | 1.90 (0.86 - 2.95) |
| Dominica | High body-mass index | 14.30 (9.71 - 18.88) |
| Dominican Republic | High body-mass index | 16.25 (11.08 - 21.42) |
| Ecuador | High body-mass index | 10.68 (7.74 - 13.61) |
| Egypt | High body-mass index | 3.90 (2.64 - 5.16) |
| El Salvador | High body-mass index | 6.53 (4.57 - 8.49) |
| Equatorial Guinea | High body-mass index | 4.07 (2.30 - 5.85) |
| Eritrea | High body-mass index | 1.72 (0.79 - 2.65) |
| Estonia | High body-mass index | 5.54 (4.12 - 6.95) |
| Eswatini | High body-mass index | 6.74 (3.49 - 9.99) |
| Ethiopia | High body-mass index | 0.88 (0.55 - 1.20) |
| Fiji | High body-mass index | 17.19 (10.88 - 23.50) |
| Finland | High body-mass index | 3.40 (2.55 - 4.25) |
| France | High body-mass index | 2.88 (2.16 - 3.60) |
| Gabon | High body-mass index | 5.44 (3.25 - 7.63) |
| Gambia | High body-mass index | 2.97 (1.77 - 4.17) |
| Georgia | High body-mass index | 12.75 (10.20 - 15.29) |
| Germany | High body-mass index | 2.53 (1.92 - 3.14) |
| Ghana | High body-mass index | 3.71 (2.16 - 5.25) |
| Greece | High body-mass index | 3.97 (3.06 - 4.87) |
| Greenland | High body-mass index | 2.05 (1.04 - 3.06) |
| Grenada | High body-mass index | 16.96 (12.87 - 21.04) |
| Guam | High body-mass index | 10.38 (7.61 - 13.16) |
| Guatemala | High body-mass index | 9.05 (7.06 - 11.04) |
| Guinea | High body-mass index | 2.54 (1.41 - 3.67) |
| Guinea-Bissau | High body-mass index | 3.31 (1.89 - 4.73) |
| Guyana | High body-mass index | 21.70 (15.91 - 27.50) |
| Haiti | High body-mass index | 13.53 (8.13 - 18.92) |
| Honduras | High body-mass index | 13.99 (8.25 - 19.73) |
| Hungary | High body-mass index | 7.29 (5.64 - 8.94) |
| Iceland | High body-mass index | 3.14 (2.36 - 3.93) |
| India | High body-mass index | 1.00 (0.73 - 1.28) |
| Indonesia | High body-mass index | 5.52 (3.67 - 7.37) |
| Iran (Islamic Republic of) | High body-mass index | 2.55 (1.76 - 3.35) |
| Iraq | High body-mass index | 4.12 (2.54 - 5.70) |
| Ireland | High body-mass index | 2.79 (2.03 - 3.55) |
| Israel | High body-mass index | 2.00 (1.49 - 2.51) |
| Italy | High body-mass index | 3.12 (2.39 - 3.85) |
| Jamaica | High body-mass index | 19.86 (14.52 - 25.20) |
| Japan | High body-mass index | 2.70 (2.03 - 3.37) |
| Jordan | High body-mass index | 4.03 (2.51 - 5.55) |
| Kazakhstan | High body-mass index | 8.05 (6.45 - 9.66) |
| Kenya | High body-mass index | 2.38 (1.57 - 3.19) |
| Kiribati | High body-mass index | 19.99 (10.24 - 29.74) |
| Kuwait | High body-mass index | 8.20 (6.44 - 9.96) |
| Kyrgyzstan | High body-mass index | 8.91 (6.73 - 11.10) |
| Lao People's Democratic Republic | High body-mass index | 4.46 (2.37 - 6.56) |
| Latvia | High body-mass index | 9.08 (6.64 - 11.52) |
| Lebanon | High body-mass index | 3.07 (1.96 - 4.17) |
| Lesotho | High body-mass index | 6.13 (3.17 - 9.09) |
| Liberia | High body-mass index | 3.13 (1.80 - 4.45) |
| Libya | High body-mass index | 6.35 (4.11 - 8.58) |
| Lithuania | High body-mass index | 8.54 (6.19 - 10.89) |
| Luxembourg | High body-mass index | 3.16 (2.45 - 3.87) |
| Madagascar | High body-mass index | 1.74 (0.90 - 2.58) |
| Malawi | High body-mass index | 2.02 (1.14 - 2.90) |
| Malaysia | High body-mass index | 5.06 (3.37 - 6.76) |
| Maldives | High body-mass index | 1.33 (0.76 - 1.90) |
| Mali | High body-mass index | 1.90 (1.08 - 2.72) |
| Malta | High body-mass index | 4.10 (3.03 - 5.18) |
| Marshall Islands | High body-mass index | 27.68 (11.59 - 43.78) |
| Mauritania | High body-mass index | 3.13 (1.87 - 4.39) |
| Mauritius | High body-mass index | 14.10 (11.07 - 17.13) |
| Mexico | High body-mass index | 6.09 (4.83 - 7.36) |
| Micronesia (Federated States of) | High body-mass index | 22.92 (12.52 - 33.32) |
| Monaco | High body-mass index | 2.25 (1.45 - 3.06) |
| Mongolia | High body-mass index | 5.83 (3.92 - 7.73) |
| Montenegro | High body-mass index | 5.85 (4.15 - 7.56) |
| Morocco | High body-mass index | 1.65 (1.00 - 2.30) |
| Mozambique | High body-mass index | 3.64 (1.70 - 5.58) |
| Myanmar | High body-mass index | 4.71 (2.81 - 6.61) |
| Namibia | High body-mass index | 3.71 (2.24 - 5.19) |
| Nauru | High body-mass index | 28.27 (14.47 - 42.07) |
| Nepal | High body-mass index | 1.08 (0.47 - 1.68) |
| Netherlands | High body-mass index | 2.58 (1.98 - 3.18) |
| New Zealand | High body-mass index | 5.30 (4.19 - 6.40) |
| Nicaragua | High body-mass index | 2.84 (1.79 - 3.90) |
| Niger | High body-mass index | 1.30 (0.67 - 1.92) |
| Nigeria | High body-mass index | 1.08 (0.68 - 1.49) |
| Niue | High body-mass index | 18.72 (10.90 - 26.54) |
| North Macedonia | High body-mass index | 7.77 (5.39 - 10.15) |
| Northern Mariana Islands | High body-mass index | 27.38 (18.42 - 36.34) |
| Norway | High body-mass index | 2.18 (1.70 - 2.66) |
| Oman | High body-mass index | 0.83 (0.48 - 1.17) |
| Pakistan | High body-mass index | 6.66 (4.68 - 8.65) |
| Palau | High body-mass index | 2.14 (1.39 - 2.89) |
| Palestine | High body-mass index | 8.95 (6.09 - 11.81) |
| Panama | High body-mass index | 6.65 (4.97 - 8.33) |
| Papua New Guinea | High body-mass index | 7.00 (2.86 - 11.14) |
| Paraguay | High body-mass index | 5.76 (3.40 - 8.11) |
| Peru | High body-mass index | 7.12 (4.51 - 9.72) |
| Philippines | High body-mass index | 5.86 (4.26 - 7.47) |
| Poland | High body-mass index | 5.21 (4.03 - 6.40) |
| Portugal | High body-mass index | 3.39 (2.53 - 4.25) |
| Puerto Rico | High body-mass index | 11.16 (8.48 - 13.84) |
| Qatar | High body-mass index | 4.33 (2.58 - 6.09) |
| Republic of Korea | High body-mass index | 1.24 (0.79 - 1.68) |
| Republic of Moldova | High body-mass index | 6.45 (5.02 - 7.87) |
| Romania | High body-mass index | 6.63 (4.87 - 8.40) |
| Russian Federation | High body-mass index | 12.57 (10.11 - 15.02) |
| Rwanda | High body-mass index | 2.21 (1.32 - 3.09) |
| Saint Kitts and Nevis | High body-mass index | 12.94 (9.91 - 15.97) |
| Saint Lucia | High body-mass index | 16.65 (13.25 - 20.04) |
| Saint Vincent and the Grenadines | High body-mass index | 16.18 (11.69 - 20.66) |
| Samoa | High body-mass index | 16.16 (9.37 - 22.95) |
| San Marino | High body-mass index | 0.70 (0.38 - 1.02) |
| Sao Tome and Principe | High body-mass index | 3.77 (2.11 - 5.43) |
| Saudi Arabia | High body-mass index | 4.38 (2.83 - 5.92) |
| Senegal | High body-mass index | 2.88 (1.67 - 4.09) |
| Serbia | High body-mass index | 6.24 (4.05 - 8.43) |
| Seychelles | High body-mass index | 9.61 (6.92 - 12.31) |
| Sierra Leone | High body-mass index | 1.80 (1.04 - 2.56) |
| Singapore | High body-mass index | 2.16 (1.50 - 2.82) |
| Slovakia | High body-mass index | 7.56 (4.90 - 10.23) |
| Slovenia | High body-mass index | 4.96 (3.67 - 6.25) |
| Solomon Islands | High body-mass index | 15.54 (8.63 - 22.45) |
| Somalia | High body-mass index | 3.59 (1.97 - 5.21) |
| South Africa | High body-mass index | 4.59 (3.45 - 5.73) |
| South Sudan | High body-mass index | 1.54 (0.82 - 2.26) |
| Spain | High body-mass index | 3.09 (2.30 - 3.89) |
| Sri Lanka | High body-mass index | 2.10 (1.19 - 3.02) |
| Sudan | High body-mass index | 3.61 (2.16 - 5.07) |
| Suriname | High body-mass index | 7.87 (5.37 - 10.38) |
| Sweden | High body-mass index | 1.64 (1.18 - 2.11) |
| Switzerland | High body-mass index | 2.13 (1.53 - 2.73) |
| Syrian Arab Republic | High body-mass index | 4.11 (2.89 - 5.33) |
| Taiwan (Province of China) | High body-mass index | 4.04 (3.00 - 5.07) |
| Tajikistan | High body-mass index | 7.42 (3.91 - 10.93) |
| Thailand | High body-mass index | 4.38 (2.87 - 5.89) |
| Timor-Leste | High body-mass index | 2.13 (1.22 - 3.04) |
| Togo | High body-mass index | 2.60 (1.53 - 3.66) |
| Tokelau | High body-mass index | 19.05 (11.66 - 26.43) |
| Tonga | High body-mass index | 14.61 (8.52 - 20.70) |
| Trinidad and Tobago | High body-mass index | 21.57 (16.19 - 26.96) |
| Tunisia | High body-mass index | 2.21 (1.40 - 3.02) |
| Turkey | High body-mass index | 5.46 (3.66 - 7.26) |
| Turkmenistan | High body-mass index | 4.84 (3.65 - 6.04) |
| Tuvalu | High body-mass index | 18.53 (10.28 - 26.78) |
| Uganda | High body-mass index | 4.16 (2.57 - 5.76) |
| Ukraine | High body-mass index | 11.44 (7.36 - 15.53) |
| United Arab Emirates | High body-mass index | 9.35 (6.34 - 12.37) |
| United Kingdom | High body-mass index | 3.67 (3.00 - 4.33) |
| United Republic of Tanzania | High body-mass index | 3.73 (2.27 - 5.18) |
| United States Virgin Islands | High body-mass index | 11.10 (6.78 - 15.43) |
| United States of America | High body-mass index | 7.90 (6.66 - 9.14) |
| Uruguay | High body-mass index | 4.24 (3.29 - 5.19) |
| Uzbekistan | High body-mass index | 7.03 (5.18 - 8.89) |
| Vanuatu | High body-mass index | 11.73 (6.84 - 16.62) |
| Venezuela (Bolivarian Republic of) | High body-mass index | 8.02 (5.85 - 10.18) |
| Viet Nam | High body-mass index | 0.71 (0.39 - 1.04) |
| Yemen | High body-mass index | 2.09 (1.22 - 2.96) |
| Zambia | High body-mass index | 5.24 (1.78 - 8.69) |
| Zimbabwe | High body-mass index | 11.06 (6.45 - 15.67) |

DALYs = disability-adjusted life years, AAPC = average annual percent change, UI = uncertainty interv

# Table S7 Age-standardized DALYs rates for ovarian cancer attributable to risk factors in 2021.

| Location | Risk factor | Ovarian cancer, per 100,000 |
| --- | --- | --- |
| Global | High body-mass index | 3.34 (1.89 - 4.79) |
| Global | Occupational exposure to asbestos | 0.06 (0.03 - 0.09) |
| High SDI | High body-mass index | 4.03 (2.33 - 5.72) |
| High SDI | Occupational exposure to asbestos | 0.07 (0.03 - 0.10) |
| High-middle SDI | High body-mass index | 4.16 (2.24 - 6.07) |
| High-middle SDI | Occupational exposure to asbestos | 0.12 (0.06 - 0.17) |
| Middle SDI | High body-mass index | 3.49 (1.97 - 5.01) |
| Middle SDI | Occupational exposure to asbestos | 0.07 (0.03 - 0.10) |
| Low-middle SDI | High body-mass index | 2.72 (1.53 - 3.92) |
| Low-middle SDI | Occupational exposure to asbestos | 0.03 (0.01 - 0.04) |
| Low SDI | High body-mass index | 1.71 (0.85 - 2.56) |
| Low SDI | Occupational exposure to asbestos | 0.00 (-0.00 - 0.01) |
| American Samoa | High body-mass index | 9.53 (4.77 - 14.30) |
| American Samoa | Occupational exposure to asbestos | 0.01 (-0.00 - 0.02) |
| Antigua and Barbuda | High body-mass index | 7.88 (4.36 - 11.39) |
| Antigua and Barbuda | Occupational exposure to asbestos | 0.02 (-0.01 - 0.05) |
| Arab Republic of Egypt | High body-mass index | 5.01 (2.81 - 7.22) |
| Arab Republic of Egypt | Occupational exposure to asbestos | 0.00 (0.00 - 0.00) |
| Argentine Republic | High body-mass index | 6.30 (3.37 - 9.24) |
| Argentine Republic | Occupational exposure to asbestos | 0.25 (0.10 - 0.40) |
| Australia | High body-mass index | 3.92 (2.25 - 5.59) |
| Australia | Occupational exposure to asbestos | 0.13 (0.06 - 0.21) |
| Barbados | High body-mass index | 10.67 (6.16 - 15.19) |
| Barbados | Occupational exposure to asbestos | 0.23 (0.07 - 0.38) |
| Belize | High body-mass index | 5.34 (3.25 - 7.43) |
| Belize | Occupational exposure to asbestos | 0.21 (0.09 - 0.32) |
| Bermuda | High body-mass index | 9.93 (5.81 - 14.04) |
| Bermuda | Occupational exposure to asbestos | 0.27 (0.10 - 0.45) |
| Bolivarian Republic of Venezuela | High body-mass index | 8.28 (4.55 - 12.01) |
| Bolivarian Republic of Venezuela | Occupational exposure to asbestos | 0.03 (-0.01 - 0.08) |
| Bosnia and Herzegovina | High body-mass index | 4.85 (2.14 - 7.56) |
| Bosnia and Herzegovina | Occupational exposure to asbestos | 0.00 (-0.01 - 0.02) |
| Brunei Darussalam | High body-mass index | 8.53 (4.08 - 12.99) |
| Brunei Darussalam | Occupational exposure to asbestos | 0.07 (-0.01 - 0.16) |
| Burkina Faso | High body-mass index | 0.48 (0.10 - 0.86) |
| Burkina Faso | Occupational exposure to asbestos | 0.00 (0.00 - 0.00) |
| Canada | High body-mass index | 4.05 (2.17 - 5.92) |
| Canada | Occupational exposure to asbestos | 0.08 (0.03 - 0.14) |
| Central African Republic | High body-mass index | 1.43 (0.40 - 2.45) |
| Central African Republic | Occupational exposure to asbestos | 0.00 (0.00 - 0.00) |
| Commonwealth of Dominica | High body-mass index | 5.81 (3.09 - 8.52) |
| Commonwealth of Dominica | Occupational exposure to asbestos | 0.00 (0.00 - 0.00) |
| Commonwealth of the Bahamas | High body-mass index | 17.04 (9.92 - 24.17) |
| Commonwealth of the Bahamas | Occupational exposure to asbestos | 0.39 (0.13 - 0.66) |
| Cook Islands | High body-mass index | 3.84 (2.05 - 5.63) |
| Cook Islands | Occupational exposure to asbestos | 0.00 (0.00 - 0.00) |
| Czech Republic | High body-mass index | 4.63 (2.36 - 6.90) |
| Czech Republic | Occupational exposure to asbestos | 0.13 (0.03 - 0.23) |
| Democratic People's Republic of Korea | High body-mass index | 0.22 (-0.19 - 0.63) |
| Democratic People's Republic of Korea | Occupational exposure to asbestos | 0.08 (0.00 - 0.16) |
| Democratic Republic of Sao Tome and Principe | High body-mass index | 4.01 (1.63 - 6.38) |
| Democratic Republic of Sao Tome and Principe | Occupational exposure to asbestos | 0.00 (0.00 - 0.00) |
| Democratic Republic of Timor-Leste | High body-mass index | 1.06 (0.31 - 1.82) |
| Democratic Republic of Timor-Leste | Occupational exposure to asbestos | 0.04 (-0.01 - 0.09) |
| Democratic Republic of the Congo | High body-mass index | 1.20 (0.32 - 2.08) |
| Democratic Republic of the Congo | Occupational exposure to asbestos | 0.00 (0.00 - 0.00) |
| Democratic Socialist Republic of Sri Lanka | High body-mass index | 2.21 (0.98 - 3.43) |
| Democratic Socialist Republic of Sri Lanka | Occupational exposure to asbestos | 0.08 (0.00 - 0.17) |
| Dominican Republic | High body-mass index | 3.76 (1.91 - 5.60) |
| Dominican Republic | Occupational exposure to asbestos | 0.05 (-0.00 - 0.10) |
| Eastern Republic of Uruguay | High body-mass index | 6.18 (3.36 - 9.00) |
| Eastern Republic of Uruguay | Occupational exposure to asbestos | 0.17 (0.08 - 0.25) |
| Federal Democratic Republic of Ethiopia | High body-mass index | 0.90 (0.27 - 1.54) |
| Federal Democratic Republic of Ethiopia | Occupational exposure to asbestos | 0.00 (0.00 - 0.00) |
| Federal Democratic Republic of Nepal | High body-mass index | 1.59 (0.52 - 2.66) |
| Federal Democratic Republic of Nepal | Occupational exposure to asbestos | 0.00 (-0.00 - 0.01) |
| Federal Republic of Germany | High body-mass index | 3.54 (1.86 - 5.21) |
| Federal Republic of Germany | Occupational exposure to asbestos | 0.07 (0.02 - 0.12) |
| Federal Republic of Nigeria | High body-mass index | 1.63 (0.79 - 2.46) |
| Federal Republic of Nigeria | Occupational exposure to asbestos | 0.00 (0.00 - 0.00) |
| Federal Republic of Somalia | High body-mass index | 2.66 (0.97 - 4.34) |
| Federal Republic of Somalia | Occupational exposure to asbestos | 0.00 (0.00 - 0.00) |
| Federated States of Micronesia | High body-mass index | 8.38 (3.89 - 12.88) |
| Federated States of Micronesia | Occupational exposure to asbestos | 0.00 (0.00 - 0.00) |
| Federative Republic of Brazil | High body-mass index | 5.28 (3.07 - 7.49) |
| Federative Republic of Brazil | Occupational exposure to asbestos | 0.30 (0.17 - 0.43) |
| French Republic | High body-mass index | 2.44 (1.29 - 3.59) |
| French Republic | Occupational exposure to asbestos | 0.06 (0.02 - 0.10) |
| Gabonese Republic | High body-mass index | 6.01 (2.79 - 9.23) |
| Gabonese Republic | Occupational exposure to asbestos | 0.00 (0.00 - 0.00) |
| Georgia | High body-mass index | 9.04 (4.60 - 13.48) |
| Georgia | Occupational exposure to asbestos | 0.14 (0.03 - 0.26) |
| Grand Duchy of Luxembourg | High body-mass index | 3.18 (1.65 - 4.72) |
| Grand Duchy of Luxembourg | Occupational exposure to asbestos | 0.02 (-0.00 - 0.04) |
| Greenland | High body-mass index | 11.11 (4.37 - 17.85) |
| Greenland | Occupational exposure to asbestos | 0.05 (-0.05 - 0.16) |
| Grenada | High body-mass index | 13.37 (7.79 - 18.95) |
| Grenada | Occupational exposure to asbestos | 0.88 (0.48 - 1.29) |
| Guam | High body-mass index | 8.00 (4.29 - 11.71) |
| Guam | Occupational exposure to asbestos | 0.00 (0.00 - 0.00) |
| Hashemite Kingdom of Jordan | High body-mass index | 5.60 (2.81 - 8.40) |
| Hashemite Kingdom of Jordan | Occupational exposure to asbestos | 0.00 (0.00 - 0.00) |
| Hellenic Republic | High body-mass index | 4.69 (2.24 - 7.14) |
| Hellenic Republic | Occupational exposure to asbestos | 0.03 (-0.00 - 0.05) |
| Hungary | High body-mass index | 6.87 (3.52 - 10.23) |
| Hungary | Occupational exposure to asbestos | 0.16 (0.04 - 0.27) |
| Independent State of Papua New Guinea | High body-mass index | 1.71 (0.51 - 2.91) |
| Independent State of Papua New Guinea | Occupational exposure to asbestos | 0.00 (0.00 - 0.00) |
| Independent State of Samoa | High body-mass index | 8.54 (4.27 - 12.81) |
| Independent State of Samoa | Occupational exposure to asbestos | 0.00 (0.00 - 0.00) |
| Ireland | High body-mass index | 3.95 (2.02 - 5.88) |
| Ireland | Occupational exposure to asbestos | 0.03 (0.00 - 0.05) |
| Islamic Republic of Afghanistan | High body-mass index | 3.04 (0.56 - 5.51) |
| Islamic Republic of Afghanistan | Occupational exposure to asbestos | 0.00 (-0.01 - 0.02) |
| Islamic Republic of Iran | High body-mass index | 3.83 (2.25 - 5.42) |
| Islamic Republic of Iran | Occupational exposure to asbestos | 0.00 (-0.00 - 0.00) |
| Islamic Republic of Mauritania | High body-mass index | 2.33 (1.07 - 3.58) |
| Islamic Republic of Mauritania | Occupational exposure to asbestos | 0.00 (0.00 - 0.00) |
| Islamic Republic of Pakistan | High body-mass index | 5.46 (2.52 - 8.41) |
| Islamic Republic of Pakistan | Occupational exposure to asbestos | 0.00 (-0.01 - 0.01) |
| Jamaica | High body-mass index | 10.02 (5.35 - 14.69) |
| Jamaica | Occupational exposure to asbestos | 0.00 (-0.01 - 0.01) |
| Japan | High body-mass index | 1.19 (0.38 - 2.01) |
| Japan | Occupational exposure to asbestos | 0.03 (0.02 - 0.05) |
| Kingdom of Bahrain | High body-mass index | 10.12 (5.37 - 14.87) |
| Kingdom of Bahrain | Occupational exposure to asbestos | 0.01 (-0.01 - 0.02) |
| Kingdom of Belgium | High body-mass index | 3.37 (1.76 - 4.99) |
| Kingdom of Belgium | Occupational exposure to asbestos | 0.11 (0.04 - 0.18) |
| Kingdom of Bhutan | High body-mass index | 3.38 (1.17 - 5.60) |
| Kingdom of Bhutan | Occupational exposure to asbestos | 0.00 (-0.00 - 0.01) |
| Kingdom of Cambodia | High body-mass index | 1.94 (0.47 - 3.41) |
| Kingdom of Cambodia | Occupational exposure to asbestos | 0.11 (-0.01 - 0.23) |
| Kingdom of Denmark | High body-mass index | 2.48 (1.32 - 3.63) |
| Kingdom of Denmark | Occupational exposure to asbestos | 0.11 (0.04 - 0.19) |
| Kingdom of Eswatini | High body-mass index | 8.82 (3.75 - 13.89) |
| Kingdom of Eswatini | Occupational exposure to asbestos | 0.07 (-0.05 - 0.18) |
| Kingdom of Lesotho | High body-mass index | 5.99 (1.95 - 10.04) |
| Kingdom of Lesotho | Occupational exposure to asbestos | 0.11 (-0.04 - 0.25) |
| Kingdom of Morocco | High body-mass index | 4.05 (1.68 - 6.41) |
| Kingdom of Morocco | Occupational exposure to asbestos | 0.00 (0.00 - 0.00) |
| Kingdom of Norway | High body-mass index | 2.86 (1.52 - 4.21) |
| Kingdom of Norway | Occupational exposure to asbestos | 0.05 (0.02 - 0.09) |
| Kingdom of Saudi Arabia | High body-mass index | 6.27 (2.88 - 9.65) |
| Kingdom of Saudi Arabia | Occupational exposure to asbestos | 0.00 (0.00 - 0.00) |
| Kingdom of Spain | High body-mass index | 3.38 (1.66 - 5.10) |
| Kingdom of Spain | Occupational exposure to asbestos | 0.07 (0.02 - 0.13) |
| Kingdom of Sweden | High body-mass index | 2.85 (1.43 - 4.27) |
| Kingdom of Sweden | Occupational exposure to asbestos | 0.07 (0.03 - 0.11) |
| Kingdom of Thailand | High body-mass index | 5.76 (2.91 - 8.62) |
| Kingdom of Thailand | Occupational exposure to asbestos | 0.09 (0.00 - 0.17) |
| Kingdom of Tonga | High body-mass index | 6.09 (3.12 - 9.06) |
| Kingdom of Tonga | Occupational exposure to asbestos | 0.00 (0.00 - 0.00) |
| Kingdom of the Netherlands | High body-mass index | 3.42 (1.85 - 4.99) |
| Kingdom of the Netherlands | Occupational exposure to asbestos | 0.12 (0.04 - 0.19) |
| Kyrgyz Republic | High body-mass index | 7.89 (3.91 - 11.88) |
| Kyrgyz Republic | Occupational exposure to asbestos | 0.05 (0.00 - 0.10) |
| Lao People's Democratic Republic | High body-mass index | 2.84 (0.89 - 4.78) |
| Lao People's Democratic Republic | Occupational exposure to asbestos | 0.06 (-0.01 - 0.13) |
| Lebanese Republic | High body-mass index | 5.51 (2.81 - 8.20) |
| Lebanese Republic | Occupational exposure to asbestos | 0.07 (-0.00 - 0.14) |
| Malaysia | High body-mass index | 4.46 (2.06 - 6.86) |
| Malaysia | Occupational exposure to asbestos | 0.01 (-0.01 - 0.03) |
| Mongolia | High body-mass index | 5.07 (2.44 - 7.71) |
| Mongolia | Occupational exposure to asbestos | 0.26 (0.06 - 0.46) |
| Montenegro | High body-mass index | 5.74 (2.72 - 8.77) |
| Montenegro | Occupational exposure to asbestos | 0.13 (-0.01 - 0.28) |
| New Zealand | High body-mass index | 3.82 (2.15 - 5.49) |
| New Zealand | Occupational exposure to asbestos | 0.11 (0.04 - 0.17) |
| North Macedonia | High body-mass index | 6.91 (3.02 - 10.80) |
| North Macedonia | Occupational exposure to asbestos | 0.03 (-0.02 - 0.09) |
| Northern Mariana Islands | High body-mass index | 9.34 (5.15 - 13.53) |
| Northern Mariana Islands | Occupational exposure to asbestos | 0.00 (0.00 - 0.00) |
| Palestine | High body-mass index | 5.41 (3.01 - 7.81) |
| Palestine | Occupational exposure to asbestos | 0.00 (0.00 - 0.00) |
| People's Democratic Republic of Algeria | High body-mass index | 2.47 (1.26 - 3.67) |
| People's Democratic Republic of Algeria | Occupational exposure to asbestos | 0.00 (0.00 - 0.00) |
| People's Republic of Bangladesh | High body-mass index | 1.77 (0.69 - 2.85) |
| People's Republic of Bangladesh | Occupational exposure to asbestos | 0.00 (-0.00 - 0.00) |
| People's Republic of China | High body-mass index | 1.74 (0.78 - 2.69) |
| People's Republic of China | Occupational exposure to asbestos | 0.03 (0.01 - 0.06) |
| Plurinational State of Bolivia | High body-mass index | 5.60 (2.69 - 8.51) |
| Plurinational State of Bolivia | Occupational exposure to asbestos | 0.14 (0.00 - 0.27) |
| Portuguese Republic | High body-mass index | 2.74 (1.37 - 4.10) |
| Portuguese Republic | Occupational exposure to asbestos | 0.05 (0.01 - 0.09) |
| Principality of Andorra | High body-mass index | 1.20 (0.42 - 1.99) |
| Principality of Andorra | Occupational exposure to asbestos | 0.06 (0.01 - 0.11) |
| Principality of Monaco | High body-mass index | 4.98 (2.10 - 7.86) |
| Principality of Monaco | Occupational exposure to asbestos | 0.01 (-0.01 - 0.02) |
| Puerto Rico | High body-mass index | 7.05 (4.04 - 10.06) |
| Puerto Rico | Occupational exposure to asbestos | 0.10 (0.02 - 0.17) |
| Republic of Albania | High body-mass index | 2.30 (1.01 - 3.60) |
| Republic of Albania | Occupational exposure to asbestos | 0.06 (-0.00 - 0.12) |
| Republic of Angola | High body-mass index | 1.67 (0.48 - 2.86) |
| Republic of Angola | Occupational exposure to asbestos | 0.00 (0.00 - 0.00) |
| Republic of Armenia | High body-mass index | 4.54 (2.25 - 6.84) |
| Republic of Armenia | Occupational exposure to asbestos | 0.52 (0.26 - 0.79) |
| Republic of Austria | High body-mass index | 2.21 (1.06 - 3.36) |
| Republic of Austria | Occupational exposure to asbestos | 0.06 (0.02 - 0.10) |
| Republic of Azerbaijan | High body-mass index | 4.46 (1.91 - 7.02) |
| Republic of Azerbaijan | Occupational exposure to asbestos | 0.04 (-0.01 - 0.08) |
| Republic of Belarus | High body-mass index | 6.82 (2.94 - 10.70) |
| Republic of Belarus | Occupational exposure to asbestos | 0.13 (0.04 - 0.22) |
| Republic of Benin | High body-mass index | 1.39 (0.55 - 2.24) |
| Republic of Benin | Occupational exposure to asbestos | 0.00 (0.00 - 0.00) |
| Republic of Botswana | High body-mass index | 5.03 (2.52 - 7.54) |
| Republic of Botswana | Occupational exposure to asbestos | 0.03 (-0.02 - 0.08) |
| Republic of Bulgaria | High body-mass index | 9.47 (4.64 - 14.29) |
| Republic of Bulgaria | Occupational exposure to asbestos | 0.13 (0.01 - 0.25) |
| Republic of Burundi | High body-mass index | 0.63 (-0.01 - 1.27) |
| Republic of Burundi | Occupational exposure to asbestos | 0.00 (0.00 - 0.00) |
| Republic of Cabo Verde | High body-mass index | 1.66 (0.70 - 2.63) |
| Republic of Cabo Verde | Occupational exposure to asbestos | 0.00 (0.00 - 0.00) |
| Republic of Cameroon | High body-mass index | 2.38 (1.17 - 3.60) |
| Republic of Cameroon | Occupational exposure to asbestos | 0.00 (0.00 - 0.00) |
| Republic of Chad | High body-mass index | 0.40 (0.06 - 0.73) |
| Republic of Chad | Occupational exposure to asbestos | 0.00 (0.00 - 0.00) |
| Republic of Chile | High body-mass index | 5.85 (3.29 - 8.42) |
| Republic of Chile | Occupational exposure to asbestos | 0.15 (0.07 - 0.23) |
| Republic of Colombia | High body-mass index | 6.83 (3.66 - 10.00) |
| Republic of Colombia | Occupational exposure to asbestos | 0.15 (0.04 - 0.25) |
| Republic of Costa Rica | High body-mass index | 6.12 (3.40 - 8.83) |
| Republic of Costa Rica | Occupational exposure to asbestos | 0.00 (-0.00 - 0.00) |
| Republic of Croatia | High body-mass index | 6.13 (2.84 - 9.41) |
| Republic of Croatia | Occupational exposure to asbestos | 0.19 (0.06 - 0.32) |
| Republic of Cuba | High body-mass index | 6.09 (3.10 - 9.08) |
| Republic of Cuba | Occupational exposure to asbestos | 0.08 (0.02 - 0.14) |
| Republic of Cyprus | High body-mass index | 3.14 (1.13 - 5.15) |
| Republic of Cyprus | Occupational exposure to asbestos | 0.01 (-0.02 - 0.04) |
| Republic of C么te d'Ivoire | High body-mass index | 2.82 (1.27 - 4.37) |
| Republic of C么te d'Ivoire | Occupational exposure to asbestos | 0.00 (0.00 - 0.00) |
| Republic of Djibouti | High body-mass index | 1.40 (0.30 - 2.51) |
| Republic of Djibouti | Occupational exposure to asbestos | 0.00 (0.00 - 0.00) |
| Republic of Ecuador | High body-mass index | 7.25 (4.06 - 10.45) |
| Republic of Ecuador | Occupational exposure to asbestos | 0.06 (0.01 - 0.11) |
| Republic of El Salvador | High body-mass index | 7.83 (4.08 - 11.57) |
| Republic of El Salvador | Occupational exposure to asbestos | 0.00 (0.00 - 0.00) |
| Republic of Equatorial Guinea | High body-mass index | 4.03 (1.58 - 6.48) |
| Republic of Equatorial Guinea | Occupational exposure to asbestos | 0.00 (0.00 - 0.00) |
| Republic of Estonia | High body-mass index | 5.35 (2.76 - 7.95) |
| Republic of Estonia | Occupational exposure to asbestos | 0.00 (-0.00 - 0.00) |
| Republic of Fiji | High body-mass index | 4.69 (2.36 - 7.02) |
| Republic of Fiji | Occupational exposure to asbestos | 0.00 (0.00 - 0.00) |
| Republic of Finland | High body-mass index | 3.27 (1.67 - 4.86) |
| Republic of Finland | Occupational exposure to asbestos | 0.04 (0.01 - 0.08) |
| Republic of Ghana | High body-mass index | 2.50 (1.13 - 3.87) |
| Republic of Ghana | Occupational exposure to asbestos | 0.00 (0.00 - 0.00) |
| Republic of Guatemala | High body-mass index | 4.17 (2.41 - 5.93) |
| Republic of Guatemala | Occupational exposure to asbestos | 0.05 (0.01 - 0.08) |
| Republic of Guinea | High body-mass index | 1.22 (0.52 - 1.92) |
| Republic of Guinea | Occupational exposure to asbestos | 0.00 (0.00 - 0.00) |
| Republic of Guinea-Bissau | High body-mass index | 1.58 (0.61 - 2.55) |
| Republic of Guinea-Bissau | Occupational exposure to asbestos | 0.00 (0.00 - 0.00) |
| Republic of Guyana | High body-mass index | 11.76 (6.38 - 17.14) |
| Republic of Guyana | Occupational exposure to asbestos | 0.55 (0.18 - 0.91) |
| Republic of Haiti | High body-mass index | 4.45 (1.60 - 7.30) |
| Republic of Haiti | Occupational exposure to asbestos | 0.27 (0.00 - 0.54) |
| Republic of Honduras | High body-mass index | 7.61 (3.04 - 12.18) |
| Republic of Honduras | Occupational exposure to asbestos | 0.14 (-0.03 - 0.32) |
| Republic of Iceland | High body-mass index | 4.60 (2.41 - 6.79) |
| Republic of Iceland | Occupational exposure to asbestos | 0.05 (0.01 - 0.10) |
| Republic of India | High body-mass index | 1.53 (0.66 - 2.41) |
| Republic of India | Occupational exposure to asbestos | 0.00 (-0.00 - 0.00) |
| Republic of Indonesia | High body-mass index | 3.43 (1.49 - 5.36) |
| Republic of Indonesia | Occupational exposure to asbestos | 0.06 (0.01 - 0.11) |
| Republic of Iraq | High body-mass index | 5.68 (2.83 - 8.53) |
| Republic of Iraq | Occupational exposure to asbestos | 0.10 (-0.01 - 0.22) |
| Republic of Italy | High body-mass index | 2.72 (1.25 - 4.19) |
| Republic of Italy | Occupational exposure to asbestos | 0.14 (0.07 - 0.22) |
| Republic of Kazakhstan | High body-mass index | 7.30 (3.65 - 10.94) |
| Republic of Kazakhstan | Occupational exposure to asbestos | 0.13 (0.03 - 0.23) |
| Republic of Kenya | High body-mass index | 3.93 (1.92 - 5.94) |
| Republic of Kenya | Occupational exposure to asbestos | 0.00 (0.00 - 0.00) |
| Republic of Kiribati | High body-mass index | 2.27 (1.15 - 3.40) |
| Republic of Kiribati | Occupational exposure to asbestos | 0.00 (0.00 - 0.00) |
| Republic of Korea | High body-mass index | 0.97 (0.20 - 1.74) |
| Republic of Korea | Occupational exposure to asbestos | 0.01 (-0.00 - 0.02) |
| Republic of Latvia | High body-mass index | 9.44 (4.29 - 14.59) |
| Republic of Latvia | Occupational exposure to asbestos | 0.06 (-0.00 - 0.12) |
| Republic of Liberia | High body-mass index | 1.95 (0.81 - 3.09) |
| Republic of Liberia | Occupational exposure to asbestos | 0.00 (0.00 - 0.00) |
| Republic of Lithuania | High body-mass index | 7.38 (3.41 - 11.35) |
| Republic of Lithuania | Occupational exposure to asbestos | 0.18 (0.04 - 0.32) |
| Republic of Madagascar | High body-mass index | 1.27 (0.11 - 2.42) |
| Republic of Madagascar | Occupational exposure to asbestos | 0.00 (0.00 - 0.00) |
| Republic of Malawi | High body-mass index | 2.18 (0.83 - 3.54) |
| Republic of Malawi | Occupational exposure to asbestos | 0.00 (0.00 - 0.00) |
| Republic of Maldives | High body-mass index | 5.21 (2.09 - 8.33) |
| Republic of Maldives | Occupational exposure to asbestos | 0.01 (-0.01 - 0.03) |
| Republic of Mali | High body-mass index | 0.60 (0.21 - 0.98) |
| Republic of Mali | Occupational exposure to asbestos | 0.00 (0.00 - 0.00) |
| Republic of Malta | High body-mass index | 5.47 (2.72 - 8.22) |
| Republic of Malta | Occupational exposure to asbestos | 0.05 (-0.00 - 0.10) |
| Republic of Mauritius | High body-mass index | 9.22 (5.14 - 13.30) |
| Republic of Mauritius | Occupational exposure to asbestos | 0.02 (-0.01 - 0.05) |
| Republic of Moldova | High body-mass index | 5.46 (2.57 - 8.34) |
| Republic of Moldova | Occupational exposure to asbestos | 0.13 (0.04 - 0.21) |
| Republic of Mozambique | High body-mass index | 3.20 (1.14 - 5.26) |
| Republic of Mozambique | Occupational exposure to asbestos | 0.00 (0.00 - 0.00) |
| Republic of Namibia | High body-mass index | 3.55 (1.50 - 5.60) |
| Republic of Namibia | Occupational exposure to asbestos | 0.04 (-0.02 - 0.10) |
| Republic of Nauru | High body-mass index | 9.52 (4.03 - 15.01) |
| Republic of Nauru | Occupational exposure to asbestos | 0.00 (0.00 - 0.00) |
| Republic of Nicaragua | High body-mass index | 4.43 (2.11 - 6.75) |
| Republic of Nicaragua | Occupational exposure to asbestos | 0.00 (-0.00 - 0.01) |
| Republic of Niue | High body-mass index | 9.07 (4.96 - 13.17) |
| Republic of Niue | Occupational exposure to asbestos | 0.00 (0.00 - 0.00) |
| Republic of Palau | High body-mass index | 1.49 (0.83 - 2.16) |
| Republic of Palau | Occupational exposure to asbestos | 0.00 (0.00 - 0.00) |
| Republic of Panama | High body-mass index | 5.51 (3.26 - 7.76) |
| Republic of Panama | Occupational exposure to asbestos | 0.03 (-0.01 - 0.06) |
| Republic of Paraguay | High body-mass index | 3.82 (1.79 - 5.85) |
| Republic of Paraguay | Occupational exposure to asbestos | 0.07 (-0.00 - 0.15) |
| Republic of Peru | High body-mass index | 6.08 (3.01 - 9.15) |
| Republic of Peru | Occupational exposure to asbestos | 0.06 (-0.01 - 0.14) |
| Republic of Poland | High body-mass index | 6.11 (2.98 - 9.25) |
| Republic of Poland | Occupational exposure to asbestos | 0.29 (0.13 - 0.46) |
| Republic of Rwanda | High body-mass index | 2.54 (1.00 - 4.07) |
| Republic of Rwanda | Occupational exposure to asbestos | 0.00 (0.00 - 0.00) |
| Republic of San Marino | High body-mass index | 1.93 (0.80 - 3.07) |
| Republic of San Marino | Occupational exposure to asbestos | 0.02 (-0.02 - 0.06) |
| Republic of Senegal | High body-mass index | 1.80 (0.79 - 2.81) |
| Republic of Senegal | Occupational exposure to asbestos | 0.00 (0.00 - 0.00) |
| Republic of Serbia | High body-mass index | 7.56 (3.62 - 11.50) |
| Republic of Serbia | Occupational exposure to asbestos | 0.19 (0.00 - 0.37) |
| Republic of Seychelles | High body-mass index | 16.10 (9.28 - 22.91) |
| Republic of Seychelles | Occupational exposure to asbestos | 0.08 (-0.01 - 0.16) |
| Republic of Sierra Leone | High body-mass index | 1.00 (0.37 - 1.63) |
| Republic of Sierra Leone | Occupational exposure to asbestos | 0.00 (0.00 - 0.00) |
| Republic of Singapore | High body-mass index | 2.70 (1.15 - 4.24) |
| Republic of Singapore | Occupational exposure to asbestos | 0.00 (0.00 - 0.00) |
| Republic of Slovenia | High body-mass index | 4.09 (2.10 - 6.08) |
| Republic of Slovenia | Occupational exposure to asbestos | 0.27 (0.10 - 0.44) |
| Republic of South Africa | High body-mass index | 7.17 (4.08 - 10.26) |
| Republic of South Africa | Occupational exposure to asbestos | 0.15 (0.04 - 0.26) |
| Republic of South Sudan | High body-mass index | 0.64 (0.01 - 1.28) |
| Republic of South Sudan | Occupational exposure to asbestos | 0.00 (0.00 - 0.00) |
| Republic of Sudan | High body-mass index | 3.31 (1.50 - 5.12) |
| Republic of Sudan | Occupational exposure to asbestos | 0.00 (0.00 - 0.00) |
| Republic of Suriname | High body-mass index | 7.09 (3.70 - 10.47) |
| Republic of Suriname | Occupational exposure to asbestos | 0.35 (0.10 - 0.60) |
| Republic of Tajikistan | High body-mass index | 2.24 (0.94 - 3.55) |
| Republic of Tajikistan | Occupational exposure to asbestos | 0.04 (0.00 - 0.07) |
| Republic of Trinidad and Tobago | High body-mass index | 13.32 (7.08 - 19.55) |
| Republic of Trinidad and Tobago | Occupational exposure to asbestos | 0.36 (0.11 - 0.61) |
| Republic of Tunisia | High body-mass index | 4.41 (2.10 - 6.73) |
| Republic of Tunisia | Occupational exposure to asbestos | 0.00 (0.00 - 0.00) |
| Republic of Turkey | High body-mass index | 6.89 (3.68 - 10.09) |
| Republic of Turkey | Occupational exposure to asbestos | 0.30 (0.06 - 0.54) |
| Republic of Uganda | High body-mass index | 3.65 (1.45 - 5.84) |
| Republic of Uganda | Occupational exposure to asbestos | 0.00 (0.00 - 0.00) |
| Republic of Uzbekistan | High body-mass index | 4.15 (2.03 - 6.26) |
| Republic of Uzbekistan | Occupational exposure to asbestos | 0.08 (0.03 - 0.13) |
| Republic of Vanuatu | High body-mass index | 2.43 (0.86 - 3.99) |
| Republic of Vanuatu | Occupational exposure to asbestos | 0.00 (0.00 - 0.00) |
| Republic of Yemen | High body-mass index | 1.56 (0.60 - 2.53) |
| Republic of Yemen | Occupational exposure to asbestos | 0.00 (0.00 - 0.00) |
| Republic of Zambia | High body-mass index | 4.40 (1.75 - 7.04) |
| Republic of Zambia | Occupational exposure to asbestos | 0.00 (0.00 - 0.00) |
| Republic of Zimbabwe | High body-mass index | 7.79 (3.43 - 12.15) |
| Republic of Zimbabwe | Occupational exposure to asbestos | 0.02 (-0.04 - 0.08) |
| Republic of the Congo | High body-mass index | 4.30 (1.89 - 6.72) |
| Republic of the Congo | Occupational exposure to asbestos | 0.00 (0.00 - 0.00) |
| Republic of the Gambia | High body-mass index | 1.60 (0.66 - 2.54) |
| Republic of the Gambia | Occupational exposure to asbestos | 0.00 (0.00 - 0.00) |
| Republic of the Marshall Islands | High body-mass index | 8.03 (3.46 - 12.61) |
| Republic of the Marshall Islands | Occupational exposure to asbestos | 0.00 (0.00 - 0.00) |
| Republic of the Niger | High body-mass index | 0.57 (0.16 - 0.99) |
| Republic of the Niger | Occupational exposure to asbestos | 0.00 (0.00 - 0.00) |
| Republic of the Philippines | High body-mass index | 5.14 (2.62 - 7.65) |
| Republic of the Philippines | Occupational exposure to asbestos | 0.09 (0.03 - 0.15) |
| Republic of the Union of Myanmar | High body-mass index | 2.89 (1.03 - 4.75) |
| Republic of the Union of Myanmar | Occupational exposure to asbestos | 0.07 (-0.01 - 0.16) |
| Romania | High body-mass index | 6.45 (3.30 - 9.61) |
| Romania | Occupational exposure to asbestos | 0.20 (0.05 - 0.35) |
| Russian Federation | High body-mass index | 8.58 (4.53 - 12.63) |
| Russian Federation | Occupational exposure to asbestos | 0.29 (0.14 - 0.45) |
| Saint Kitts and Nevis | High body-mass index | 6.77 (3.72 - 9.83) |
| Saint Kitts and Nevis | Occupational exposure to asbestos | 0.09 (0.01 - 0.18) |
| Saint Lucia | High body-mass index | 12.82 (7.40 - 18.24) |
| Saint Lucia | Occupational exposure to asbestos | 0.48 (0.20 - 0.77) |
| Saint Vincent and the Grenadines | High body-mass index | 9.85 (5.22 - 14.48) |
| Saint Vincent and the Grenadines | Occupational exposure to asbestos | 0.68 (0.32 - 1.04) |
| Slovak Republic | High body-mass index | 5.91 (2.57 - 9.25) |
| Slovak Republic | Occupational exposure to asbestos | 0.11 (-0.00 - 0.22) |
| Socialist Republic of Viet Nam | High body-mass index | 0.46 (0.02 - 0.90) |
| Socialist Republic of Viet Nam | Occupational exposure to asbestos | 0.03 (-0.00 - 0.06) |
| Solomon Islands | High body-mass index | 4.04 (1.67 - 6.41) |
| Solomon Islands | Occupational exposure to asbestos | 0.00 (0.00 - 0.00) |
| State of Eritrea | High body-mass index | 0.97 (0.09 - 1.85) |
| State of Eritrea | Occupational exposure to asbestos | 0.00 (0.00 - 0.00) |
| State of Israel | High body-mass index | 2.57 (1.29 - 3.84) |
| State of Israel | Occupational exposure to asbestos | 0.06 (0.02 - 0.11) |
| State of Kuwait | High body-mass index | 5.10 (2.95 - 7.24) |
| State of Kuwait | Occupational exposure to asbestos | 0.00 (0.00 - 0.00) |
| State of Libya | High body-mass index | 9.84 (4.50 - 15.18) |
| State of Libya | Occupational exposure to asbestos | 0.00 (0.00 - 0.00) |
| State of Qatar | High body-mass index | 6.88 (3.32 - 10.45) |
| State of Qatar | Occupational exposure to asbestos | 0.01 (-0.01 - 0.02) |
| Sultanate of Oman | High body-mass index | 2.24 (1.15 - 3.33) |
| Sultanate of Oman | Occupational exposure to asbestos | 0.00 (-0.00 - 0.00) |
| Swiss Confederation | High body-mass index | 1.35 (0.61 - 2.08) |
| Swiss Confederation | Occupational exposure to asbestos | 0.07 (0.03 - 0.12) |
| Syrian Arab Republic | High body-mass index | 3.96 (2.14 - 5.78) |
| Syrian Arab Republic | Occupational exposure to asbestos | 0.00 (0.00 - 0.00) |
| Taiwan (Province of China) | High body-mass index | 3.73 (1.92 - 5.54) |
| Taiwan (Province of China) | Occupational exposure to asbestos | 0.03 (-0.01 - 0.07) |
| Togolese Republic | High body-mass index | 1.69 (0.71 - 2.66) |
| Togolese Republic | Occupational exposure to asbestos | 0.00 (0.00 - 0.00) |
| Tokelau | High body-mass index | 7.91 (4.20 - 11.62) |
| Tokelau | Occupational exposure to asbestos | 0.00 (0.00 - 0.00) |
| Turkmenistan | High body-mass index | 5.54 (2.63 - 8.45) |
| Turkmenistan | Occupational exposure to asbestos | 0.12 (0.02 - 0.23) |
| Tuvalu | High body-mass index | 6.27 (3.16 - 9.39) |
| Tuvalu | Occupational exposure to asbestos | 0.00 (0.00 - 0.00) |
| Ukraine | High body-mass index | 8.57 (3.36 - 13.78) |
| Ukraine | Occupational exposure to asbestos | 0.34 (0.12 - 0.56) |
| Union of the Comoros | High body-mass index | 4.64 (1.89 - 7.40) |
| Union of the Comoros | Occupational exposure to asbestos | 0.00 (0.00 - 0.00) |
| United Arab Emirates | High body-mass index | 13.52 (7.47 - 19.57) |
| United Arab Emirates | Occupational exposure to asbestos | 0.00 (0.00 - 0.00) |
| United Kingdom of Great Britain and Northern Ireland | High body-mass index | 4.52 (2.50 - 6.54) |
| United Kingdom of Great Britain and Northern Ireland | Occupational exposure to asbestos | 0.15 (0.08 - 0.23) |
| United Mexican States | High body-mass index | 11.13 (6.51 - 15.75) |
| United Mexican States | Occupational exposure to asbestos | 0.20 (0.09 - 0.31) |
| United Republic of Tanzania | High body-mass index | 4.81 (1.98 - 7.63) |
| United Republic of Tanzania | Occupational exposure to asbestos | 0.00 (0.00 - 0.00) |
| United States Virgin Islands | High body-mass index | 12.86 (7.03 - 18.70) |
| United States Virgin Islands | Occupational exposure to asbestos | 0.56 (0.16 - 0.96) |
| United States of America | High body-mass index | 5.56 (3.34 - 7.78) |
| United States of America | Occupational exposure to asbestos | 0.05 (0.02 - 0.08) |

# Table S8. Age-standardized DALYs rate of average annual percent change attributable to risk factors for female breast cancer from 1990 to 2021

| Location | Risk factors | AAPC for ASDR, 95% CI |
| --- | --- | --- |
| Global | Diet high in red meat | -0.0 (-0.1 to 0.1) |
| Global | High alcohol use | -1.7 (-1.8 to -1.6) |
| Global | High body-mass index | 0 (0 to 0) |
| Global | High fasting plasma glucose | 1.7 (1.6 to 1.8) |
| Global | Low physical activity | 0.4 (0.2 to 0.5) |
| Global | Secondhand smoke | -0.7 (-0.8 to -0.6) |
| Global | Smoking | -2.5 (-2.6 to -2.3) |
| High SDI | Diet high in red meat | -1.5 (-1.6 to -1.4) |
| High SDI | High alcohol use | -1.9 (-2.0 to -1.8) |
| High SDI | High body-mass index | 0 (0 to 0) |
| High SDI | High fasting plasma glucose | 0.2 (0.1 to 0.4) |
| High SDI | Low physical activity | -1.1 (-1.1 to -1.0) |
| High SDI | Secondhand smoke | -2.7 (-2.9 to -2.6) |
| High SDI | Smoking | -2.9 (-3.1 to -2.7) |
| High-middle SDI | Diet high in red meat | -0.4 (-0.5 to -0.2) |
| High-middle SDI | High alcohol use | -1.8 (-1.9 to -1.6) |
| High-middle SDI | High body-mass index | 0 (0 to 0) |
| High-middle SDI | High fasting plasma glucose | 1.4 (1.2 to 1.5) |
| High-middle SDI | Low physical activity | 0.2 (0.0 to 0.3) |
| High-middle SDI | Secondhand smoke | -0.8 (-1.0 to -0.7) |
| High-middle SDI | Smoking | -0.7 (-0.8 to -0.6) |
| Middle SDI | Diet high in red meat | 1.0 (0.9 to 1.0) |
| Middle SDI | High alcohol use | 1.3 (1.2 to 1.4) |
| Middle SDI | High body-mass index | 0 (0 to 0) |
| Middle SDI | High fasting plasma glucose | 2.5 (2.4 to 2.6) |
| Middle SDI | Low physical activity | 1.5 (1.4 to 1.6) |
| Middle SDI | Secondhand smoke | -0.1 (-0.2 to 0.0) |
| Middle SDI | Smoking | -1.2 (-1.4 to -1.0) |
| Low-middle SDI | Diet high in red meat | 1.8 (1.8 to 1.8) |
| Low-middle SDI | High alcohol use | 2.6 (2.5 to 2.6) |
| Low-middle SDI | High body-mass index | 0 (0 to 0) |
| Low-middle SDI | High fasting plasma glucose | 3.0 (3.0 to 3.1) |
| Low-middle SDI | Low physical activity | 1.7 (1.6 to 1.7) |
| Low-middle SDI | Secondhand smoke | 0.4 (0.3 to 0.5) |
| Low-middle SDI | Smoking | -0.8 (-1.0 to -0.6) |
| Low SDI | Diet high in red meat | 0.9 (0.7 to 1.1) |
| Low SDI | High alcohol use | 1.1 (0.9 to 1.4) |
| Low SDI | High body-mass index | 0 (0 to 0) |
| Low SDI | High fasting plasma glucose | 1.7 (1.5 to 1.9) |
| Low SDI | Low physical activity | 1.1 (0.9 to 1.3) |
| Low SDI | Secondhand smoke | -0.2 (-0.3 to -0.1) |
| Low SDI | Smoking | -0.4 (-0.5 to -0.3) |
| Afghanistan | Diet high in red meat | 2.1 (1.6 to 2.5) |
| Afghanistan | High alcohol use | 0 (0 to 0) |
| Afghanistan | High body-mass index | 0 (0 to 0) |
| Afghanistan | High fasting plasma glucose | 4.1 (3.2 to 5.0) |
| Afghanistan | Low physical activity | 2.1 (1.6 to 2.6) |
| Afghanistan | Secondhand smoke | 4.0 (3.5 to 4.5) |
| Afghanistan | Smoking | 4.4 (3.8 to 5.0) |
| Albania | Diet high in red meat | 1.3 (0.8 to 1.7) |
| Albania | High alcohol use | 3.0 (1.8 to 4.3) |
| Albania | High body-mass index | 0 (0 to 0) |
| Albania | High fasting plasma glucose | 3.5 (3.0 to 3.9) |
| Albania | Low physical activity | 1.7 (1.3 to 2.2) |
| Albania | Secondhand smoke | 1.4 (1.1 to 1.8) |
| Albania | Smoking | 4.4 (3.8 to 5.0) |
| Algeria | Diet high in red meat | 1.7 (1.7 to 1.8) |
| Algeria | High alcohol use | 2.7 (2.6 to 2.8) |
| Algeria | High body-mass index | 0 (0 to 0) |
| Algeria | High fasting plasma glucose | 3.6 (3.6 to 3.7) |
| Algeria | Low physical activity | 1.9 (1.8 to 1.9) |
| Algeria | Secondhand smoke | 1.6 (1.5 to 1.7) |
| Algeria | Smoking | 0.6 (0.5 to 0.6) |
| American Samoa | Diet high in red meat | 3.0 (2.8 to 3.1) |
| American Samoa | High alcohol use | 2.3 (1.6 to 3.1) |
| American Samoa | High body-mass index | 0 (0 to 0) |
| American Samoa | High fasting plasma glucose | 3.3 (3.1 to 3.4) |
| American Samoa | Low physical activity | 3.0 (2.8 to 3.2) |
| American Samoa | Secondhand smoke | 2.8 (2.6 to 2.9) |
| American Samoa | Smoking | 3.0 (2.8 to 3.2) |
| Andorra | Diet high in red meat | 0.4 (0.2 to 0.7) |
| Andorra | High alcohol use | -0.0 (-0.3 to 0.2) |
| Andorra | High body-mass index | 0 (0 to 0) |
| Andorra | High fasting plasma glucose | 1.6 (1.4 to 1.8) |
| Andorra | Low physical activity | 0.6 (0.3 to 0.8) |
| Andorra | Secondhand smoke | -0.9 (-1.1 to -0.7) |
| Andorra | Smoking | 0.0 (-0.2 to 0.3) |
| Angola | Diet high in red meat | 1.5 (1.3 to 1.6) |
| Angola | High alcohol use | 3.6 (3.2 to 4.1) |
| Angola | High body-mass index | 0 (0 to 0) |
| Angola | High fasting plasma glucose | 2.6 (2.4 to 2.8) |
| Angola | Low physical activity | 1.5 (1.3 to 1.6) |
| Angola | Secondhand smoke | 1.5 (1.2 to 1.7) |
| Angola | Smoking | 1.5 (1.2 to 1.7) |
| Antigua and Barbuda | Diet high in red meat | 1.2 (1.0 to 1.4) |
| Antigua and Barbuda | High alcohol use | 3.5 (3.1 to 3.8) |
| Antigua and Barbuda | High body-mass index | 0 (0 to 0) |
| Antigua and Barbuda | High fasting plasma glucose | 3.3 (3.0 to 3.6) |
| Antigua and Barbuda | Low physical activity | 1.4 (1.2 to 1.6) |
| Antigua and Barbuda | Secondhand smoke | 1.4 (1.1 to 1.6) |
| Antigua and Barbuda | Smoking | 1.2 (1.0 to 1.5) |
| Argentina | Diet high in red meat | -1.1 (-1.2 to -0.9) |
| Argentina | High alcohol use | -1.5 (-1.7 to -1.3) |
| Argentina | High body-mass index | 0 (0 to 0) |
| Argentina | High fasting plasma glucose | 0.8 (0.7 to 0.9) |
| Argentina | Low physical activity | -1.5 (-1.8 to -1.2) |
| Argentina | Secondhand smoke | -1.4 (-1.5 to -1.3) |
| Argentina | Smoking | -2.7 (-3.0 to -2.5) |
| Armenia | Diet high in red meat | -2.9 (-3.6 to -2.2) |
| Armenia | High alcohol use | -1.2 (-2.0 to -0.4) |
| Armenia | High body-mass index | 0 (0 to 0) |
| Armenia | High fasting plasma glucose | -1.1 (-2.0 to -0.2) |
| Armenia | Low physical activity | -2.6 (-3.3 to -1.9) |
| Armenia | Secondhand smoke | -3.1 (-3.7 to -2.4) |
| Armenia | Smoking | -2.7 (-3.5 to -1.9) |
| Australia | Diet high in red meat | -1.9 (-2.1 to -1.8) |
| Australia | High alcohol use | -2.0 (-2.2 to -1.9) |
| Australia | High body-mass index | 0 (0 to 0) |
| Australia | High fasting plasma glucose | 0.5 (0.3 to 0.8) |
| Australia | Low physical activity | -1.5 (-1.6 to -1.4) |
| Australia | Secondhand smoke | -4.0 (-4.1 to -3.8) |
| Australia | Smoking | -2.7 (-2.9 to -2.5) |
| Austria | Diet high in red meat | -1.6 (-1.8 to -1.5) |
| Austria | High alcohol use | -2.0 (-2.1 to -1.8) |
| Austria | High body-mass index | 0 (0 to 0) |
| Austria | High fasting plasma glucose | 0.1 (-0.1 to 0.3) |
| Austria | Low physical activity | -2.0 (-2.2 to -1.8) |
| Austria | Secondhand smoke | -2.1 (-2.2 to -1.9) |
| Austria | Smoking | -1.7 (-1.9 to -1.6) |
| Azerbaijan | Diet high in red meat | -0.4 (-0.7 to -0.1) |
| Azerbaijan | High alcohol use | -0.8 (-1.2 to -0.4) |
| Azerbaijan | High body-mass index | 0 (0 to 0) |
| Azerbaijan | High fasting plasma glucose | 2.0 (1.7 to 2.4) |
| Azerbaijan | Low physical activity | -0.2 (-0.5 to 0.2) |
| Azerbaijan | Secondhand smoke | -0.0 (-0.4 to 0.3) |
| Azerbaijan | Smoking | 0.9 (0.2 to 1.5) |
| Bahrain | Diet high in red meat | 1.0 (0.6 to 1.3) |
| Bahrain | High alcohol use | -1.6 (-2.0 to -1.2) |
| Bahrain | High body-mass index | 0 (0 to 0) |
| Bahrain | High fasting plasma glucose | 3.0 (2.6 to 3.4) |
| Bahrain | Low physical activity | 1.1 (0.7 to 1.5) |
| Bahrain | Secondhand smoke | 1.5 (1.3 to 1.7) |
| Bahrain | Smoking | 0.3 (0.0 to 0.6) |
| Bangladesh | Diet high in red meat | 2.4 (2.2 to 2.5) |
| Bangladesh | High alcohol use | 5.4 (5.1 to 5.6) |
| Bangladesh | High body-mass index | 0 (0 to 0) |
| Bangladesh | High fasting plasma glucose | 3.7 (3.4 to 4.1) |
| Bangladesh | Low physical activity | 3.0 (2.7 to 3.3) |
| Bangladesh | Secondhand smoke | 1.4 (1.3 to 1.6) |
| Bangladesh | Smoking | 2.6 (2.0 to 3.2) |
| Barbados | Diet high in red meat | 0.6 (0.3 to 0.8) |
| Barbados | High alcohol use | 1.6 (1.4 to 1.8) |
| Barbados | High body-mass index | 0 (0 to 0) |
| Barbados | High fasting plasma glucose | 1.7 (1.4 to 2.1) |
| Barbados | Low physical activity | 0.7 (0.3 to 1.0) |
| Barbados | Secondhand smoke | -0.7 (-1.0 to -0.3) |
| Barbados | Smoking | -0.2 (-0.6 to 0.2) |
| Belarus | Diet high in red meat | -1.8 (-2.2 to -1.4) |
| Belarus | High alcohol use | -1.7 (-2.1 to -1.3) |
| Belarus | High body-mass index | 0 (0 to 0) |
| Belarus | High fasting plasma glucose | -0.6 (-1.0 to -0.2) |
| Belarus | Low physical activity | -1.4 (-1.8 to -1.1) |
| Belarus | Secondhand smoke | -1.8 (-2.2 to -1.5) |
| Belarus | Smoking | -2.4 (-2.8 to -2.1) |
| Belgium | Diet high in red meat | -2.7 (-2.9 to -2.4) |
| Belgium | High alcohol use | -2.9 (-3.3 to -2.5) |
| Belgium | High body-mass index | 0 (0 to 0) |
| Belgium | High fasting plasma glucose | -1.5 (-1.9 to -1.2) |
| Belgium | Low physical activity | -2.9 (-3.2 to -2.6) |
| Belgium | Secondhand smoke | -4.6 (-5.0 to -4.3) |
| Belgium | Smoking | -3.6 (-4.0 to -3.1) |
| Belize | Diet high in red meat | 2.2 (1.8 to 2.6) |
| Belize | High alcohol use | 3.0 (2.6 to 3.3) |
| Belize | High body-mass index | 0 (0 to 0) |
| Belize | High fasting plasma glucose | 4.4 (3.8 to 5.0) |
| Belize | Low physical activity | 2.5 (2.1 to 2.9) |
| Belize | Secondhand smoke | 1.8 (1.5 to 2.1) |
| Belize | Smoking | 2.1 (1.8 to 2.4) |
| Benin | Diet high in red meat | 0.2 (-0.0 to 0.4) |
| Benin | High alcohol use | 1.6 (1.5 to 1.8) |
| Benin | High body-mass index | 0 (0 to 0) |
| Benin | High fasting plasma glucose | 2.6 (2.4 to 2.7) |
| Benin | Low physical activity | 0.2 (-0.1 to 0.6) |
| Benin | Secondhand smoke | -1.8 (-2.0 to -1.5) |
| Benin | Smoking | -2.5 (-2.9 to -2.0) |
| Bermuda | Diet high in red meat | -1.3 (-1.5 to -1.2) |
| Bermuda | High alcohol use | -1.9 (-2.1 to -1.7) |
| Bermuda | High body-mass index | 0 (0 to 0) |
| Bermuda | High fasting plasma glucose | 0.8 (0.6 to 1.0) |
| Bermuda | Low physical activity | -1.2 (-1.3 to -1.0) |
| Bermuda | Secondhand smoke | -1.6 (-1.7 to -1.4) |
| Bermuda | Smoking | -1.2 (-1.3 to -1.0) |
| Bhutan | Diet high in red meat | 1.0 (0.8 to 1.2) |
| Bhutan | High alcohol use | -3.9 (-4.4 to -3.4) |
| Bhutan | High body-mass index | 0 (0 to 0) |
| Bhutan | High fasting plasma glucose | 1.4 (1.2 to 1.6) |
| Bhutan | Low physical activity | 0.8 (0.6 to 1.0) |
| Bhutan | Secondhand smoke | 0.0 (-0.2 to 0.3) |
| Bhutan | Smoking | -0.0 (-0.3 to 0.2) |
| Bolivarian Republic of Venezuela | Diet high in red meat | 1.6 (1.3 to 1.9) |
| Bolivarian Republic of Venezuela | High alcohol use | -0.1 (-0.3 to 0.0) |
| Bolivarian Republic of Venezuela | High body-mass index | 0 (0 to 0) |
| Bolivarian Republic of Venezuela | High fasting plasma glucose | 2.7 (2.4 to 3.1) |
| Bolivarian Republic of Venezuela | Low physical activity | 1.9 (1.6 to 2.2) |
| Bolivarian Republic of Venezuela | Secondhand smoke | 0.4 (0.0 to 0.7) |
| Bolivarian Republic of Venezuela | Smoking | -0.1 (-0.4 to 0.2) |
| Bosnia and Herzegovina | Diet high in red meat | 0.0 (-0.3 to 0.3) |
| Bosnia and Herzegovina | High alcohol use | 1.3 (1.0 to 1.6) |
| Bosnia and Herzegovina | High body-mass index | 0 (0 to 0) |
| Bosnia and Herzegovina | High fasting plasma glucose | 1.9 (1.5 to 2.4) |
| Bosnia and Herzegovina | Low physical activity | 0.4 (0.2 to 0.7) |
| Bosnia and Herzegovina | Secondhand smoke | 0.1 (-0.5 to 0.7) |
| Bosnia and Herzegovina | Smoking | 1.2 (0.9 to 1.6) |
| Botswana | Diet high in red meat | 1.8 (1.3 to 2.2) |
| Botswana | High alcohol use | 1.8 (1.4 to 2.2) |
| Botswana | High body-mass index | 0 (0 to 0) |
| Botswana | High fasting plasma glucose | 3.5 (3.0 to 3.9) |
| Botswana | Low physical activity | 2.0 (1.5 to 2.4) |
| Botswana | Secondhand smoke | 1.2 (0.8 to 1.6) |
| Botswana | Smoking | 0.3 (-0.1 to 0.7) |
| Brazil | Diet high in red meat | 1.0 (0.9 to 1.0) |
| Brazil | High alcohol use | 1.6 (1.4 to 1.9) |
| Brazil | High body-mass index | 0 (0 to 0) |
| Brazil | High fasting plasma glucose | 2.8 (2.7 to 2.8) |
| Brazil | Low physical activity | 1.5 (1.5 to 1.6) |
| Brazil | Secondhand smoke | -1.7 (-1.9 to -1.5) |
| Brazil | Smoking | -3.0 (-3.4 to -2.7) |
| Brunei Darussalam | Diet high in red meat | 1.4 (1.1 to 1.7) |
| Brunei Darussalam | High alcohol use | 0.9 (-0.2 to 2.0) |
| Brunei Darussalam | High body-mass index | 0 (0 to 0) |
| Brunei Darussalam | High fasting plasma glucose | 2.7 (2.4 to 3.1) |
| Brunei Darussalam | Low physical activity | 1.6 (1.3 to 1.9) |
| Brunei Darussalam | Secondhand smoke | -0.5 (-1.1 to 0.0) |
| Brunei Darussalam | Smoking | 0.8 (0.3 to 1.3) |
| Bulgaria | Diet high in red meat | -0.1 (-0.3 to 0.2) |
| Bulgaria | High alcohol use | 0.6 (0.3 to 0.9) |
| Bulgaria | High body-mass index | 0 (0 to 0) |
| Bulgaria | High fasting plasma glucose | 0.1 (-0.2 to 0.5) |
| Bulgaria | Low physical activity | 0.0 (-0.2 to 0.3) |
| Bulgaria | Secondhand smoke | -1.0 (-1.2 to -0.8) |
| Bulgaria | Smoking | -0.2 (-0.5 to 0.1) |
| Burkina Faso | Diet high in red meat | 0.1 (-0.0 to 0.3) |
| Burkina Faso | High alcohol use | 0.6 (0.5 to 0.7) |
| Burkina Faso | High body-mass index | 0 (0 to 0) |
| Burkina Faso | High fasting plasma glucose | 1.3 (1.2 to 1.5) |
| Burkina Faso | Low physical activity | 0.0 (-0.2 to 0.3) |
| Burkina Faso | Secondhand smoke | -0.8 (-1.0 to -0.6) |
| Burkina Faso | Smoking | -1.1 (-1.3 to -0.8) |
| Burundi | Diet high in red meat | -1.6 (-2.1 to -1.1) |
| Burundi | High alcohol use | -2.2 (-2.6 to -1.9) |
| Burundi | High body-mass index | 0 (0 to 0) |
| Burundi | High fasting plasma glucose | -0.6 (-0.9 to -0.3) |
| Burundi | Low physical activity | -1.0 (-1.3 to -0.7) |
| Burundi | Secondhand smoke | -2.4 (-2.9 to -1.9) |
| Burundi | Smoking | -2.4 (-2.6 to -2.1) |
| Cambodia | Diet high in red meat | 1.7 (1.5 to 1.8) |
| Cambodia | High alcohol use | 6.5 (6.1 to 6.9) |
| Cambodia | High body-mass index | 0 (0 to 0) |
| Cambodia | High fasting plasma glucose | 2.5 (2.3 to 2.6) |
| Cambodia | Low physical activity | 1.3 (1.1 to 1.5) |
| Cambodia | Secondhand smoke | 1.4 (1.2 to 1.7) |
| Cambodia | Smoking | 1.8 (1.5 to 2.0) |
| Cameroon | Diet high in red meat | 0.6 (0.5 to 0.7) |
| Cameroon | High alcohol use | 2.1 (1.9 to 2.2) |
| Cameroon | High body-mass index | 0 (0 to 0) |
| Cameroon | High fasting plasma glucose | 3.0 (2.9 to 3.2) |
| Cameroon | Low physical activity | 0.8 (0.6 to 1.0) |
| Cameroon | Secondhand smoke | -0.8 (-0.9 to -0.7) |
| Cameroon | Smoking | -0.4 (-0.5 to -0.3) |
| Canada | Diet high in red meat | -1.7 (-1.9 to -1.6) |
| Canada | High alcohol use | -1.5 (-1.6 to -1.4) |
| Canada | High body-mass index | 0 (0 to 0) |
| Canada | High fasting plasma glucose | -0.2 (-0.4 to 0.1) |
| Canada | Low physical activity | -1.5 (-1.6 to -1.4) |
| Canada | Secondhand smoke | -3.6 (-3.8 to -3.4) |
| Canada | Smoking | -3.4 (-3.6 to -3.2) |
| Central African Republic | Diet high in red meat | 0.6 (0.5 to 0.7) |
| Central African Republic | High alcohol use | -0.7 (-0.8 to -0.6) |
| Central African Republic | High body-mass index | 0 (0 to 0) |
| Central African Republic | High fasting plasma glucose | 1.4 (1.3 to 1.5) |
| Central African Republic | Low physical activity | 0.5 (0.4 to 0.7) |
| Central African Republic | Secondhand smoke | -0.4 (-0.7 to -0.1) |
| Central African Republic | Smoking | -0.4 (-0.6 to -0.1) |
| Chad | Diet high in red meat | 0.7 (0.6 to 0.8) |
| Chad | High alcohol use | 4.0 (3.7 to 4.4) |
| Chad | High body-mass index | 0 (0 to 0) |
| Chad | High fasting plasma glucose | 1.7 (1.6 to 1.7) |
| Chad | Low physical activity | 1.0 (0.8 to 1.1) |
| Chad | Secondhand smoke | -0.5 (-0.6 to -0.3) |
| Chad | Smoking | -0.9 (-1.1 to -0.7) |
| Chile | Diet high in red meat | -0.3 (-0.4 to -0.1) |
| Chile | High alcohol use | 0.0 (-0.2 to 0.3) |
| Chile | High body-mass index | 0 (0 to 0) |
| Chile | High fasting plasma glucose | 1.7 (1.5 to 1.9) |
| Chile | Low physical activity | -0.2 (-0.3 to -0.0) |
| Chile | Secondhand smoke | -1.5 (-1.6 to -1.3) |
| Chile | Smoking | -0.8 (-0.9 to -0.6) |
| China | Diet high in red meat | 0.4 (0.3 to 0.6) |
| China | High alcohol use | 0.7 (0.4 to 1.0) |
| China | High body-mass index | 0 (0 to 0) |
| China | High fasting plasma glucose | 2.0 (1.8 to 2.1) |
| China | Low physical activity | 0.8 (0.7 to 0.9) |
| China | Secondhand smoke | 0.1 (-0.1 to 0.2) |
| China | Smoking | 0.6 (0.4 to 0.8) |
| Colombia | Diet high in red meat | 1.2 (1.0 to 1.4) |
| Colombia | High alcohol use | -0.0 (-0.4 to 0.3) |
| Colombia | High body-mass index | 0 (0 to 0) |
| Colombia | High fasting plasma glucose | 2.2 (1.9 to 2.4) |
| Colombia | Low physical activity | 2.2 (1.7 to 2.7) |
| Colombia | Secondhand smoke | -0.8 (-1.0 to -0.6) |
| Colombia | Smoking | -0.7 (-0.8 to -0.5) |
| Commonwealth of the Bahamas | Diet high in red meat | 1.0 (0.8 to 1.2) |
| Commonwealth of the Bahamas | High alcohol use | -0.6 (-0.7 to -0.5) |
| Commonwealth of the Bahamas | High body-mass index | 0 (0 to 0) |
| Commonwealth of the Bahamas | High fasting plasma glucose | 3.3 (3.0 to 3.6) |
| Commonwealth of the Bahamas | Low physical activity | 1.2 (1.0 to 1.4) |
| Commonwealth of the Bahamas | Secondhand smoke | 1.0 (0.8 to 1.2) |
| Commonwealth of the Bahamas | Smoking | 0.8 (0.6 to 1.1) |
| Comoros | Diet high in red meat | 1.1 (0.8 to 1.4) |
| Comoros | High alcohol use | 2.8 (2.4 to 3.2) |
| Comoros | High body-mass index | 0 (0 to 0) |
| Comoros | High fasting plasma glucose | 2.2 (1.9 to 2.5) |
| Comoros | Low physical activity | 3.0 (2.5 to 3.5) |
| Comoros | Secondhand smoke | 0.9 (0.6 to 1.2) |
| Comoros | Smoking | 0.8 (0.5 to 1.0) |
| Congo | Diet high in red meat | 1.9 (1.7 to 2.1) |
| Congo | High alcohol use | 3.7 (3.2 to 4.2) |
| Congo | High body-mass index | 0 (0 to 0) |
| Congo | High fasting plasma glucose | 3.3 (3.1 to 3.5) |
| Congo | Low physical activity | 1.9 (1.6 to 2.2) |
| Congo | Secondhand smoke | 2.3 (2.1 to 2.5) |
| Congo | Smoking | 1.6 (1.4 to 1.8) |
| Cook Islands | Diet high in red meat | 1.0 (0.8 to 1.3) |
| Cook Islands | High alcohol use | 8.3 (7.5 to 9.0) |
| Cook Islands | High body-mass index | 0 (0 to 0) |
| Cook Islands | High fasting plasma glucose | 1.1 (0.9 to 1.3) |
| Cook Islands | Low physical activity | 1.0 (0.8 to 1.2) |
| Cook Islands | Secondhand smoke | 0.3 (0.2 to 0.5) |
| Cook Islands | Smoking | -0.0 (-0.2 to 0.1) |
| Costa Rica | Diet high in red meat | 1.5 (1.3 to 1.8) |
| Costa Rica | High alcohol use | 0.3 (-0.1 to 0.7) |
| Costa Rica | High body-mass index | 0 (0 to 0) |
| Costa Rica | High fasting plasma glucose | 2.8 (2.5 to 3.0) |
| Costa Rica | Low physical activity | 1.7 (1.5 to 1.9) |
| Costa Rica | Secondhand smoke | -0.5 (-0.8 to -0.3) |
| Costa Rica | Smoking | -0.2 (-0.5 to 0.0) |
| Croatia | Diet high in red meat | -1.3 (-1.6 to -1.1) |
| Croatia | High alcohol use | -1.7 (-2.0 to -1.5) |
| Croatia | High body-mass index | 0 (0 to 0) |
| Croatia | High fasting plasma glucose | -0.0 (-0.3 to 0.2) |
| Croatia | Low physical activity | -0.5 (-0.7 to -0.3) |
| Croatia | Secondhand smoke | -1.9 (-2.1 to -1.7) |
| Croatia | Smoking | -1.5 (-1.7 to -1.3) |
| Cuba | Diet high in red meat | 0.1 (-0.1 to 0.4) |
| Cuba | High alcohol use | 0.7 (0.5 to 0.9) |
| Cuba | High body-mass index | 0 (0 to 0) |
| Cuba | High fasting plasma glucose | 2.7 (2.4 to 3.0) |
| Cuba | Low physical activity | 0.3 (0.1 to 0.5) |
| Cuba | Secondhand smoke | -0.9 (-1.3 to -0.6) |
| Cuba | Smoking | -1.4 (-1.8 to -1.1) |
| Cyprus | Diet high in red meat | -1.0 (-1.2 to -0.7) |
| Cyprus | High alcohol use | -1.1 (-1.4 to -0.8) |
| Cyprus | High body-mass index | 0 (0 to 0) |
| Cyprus | High fasting plasma glucose | -0.0 (-0.3 to 0.2) |
| Cyprus | Low physical activity | -1.0 (-1.2 to -0.7) |
| Cyprus | Secondhand smoke | -0.9 (-1.2 to -0.7) |
| Cyprus | Smoking | -1.2 (-1.3 to -1.0) |
| Czech Republic | Diet high in red meat | -1.4 (-1.8 to -1.1) |
| Czech Republic | High alcohol use | -1.5 (-1.8 to -1.1) |
| Czech Republic | High body-mass index | 0 (0 to 0) |
| Czech Republic | High fasting plasma glucose | -0.3 (-0.7 to 0.0) |
| Czech Republic | Low physical activity | -0.6 (-1.0 to -0.2) |
| Czech Republic | Secondhand smoke | -2.4 (-2.8 to -2.1) |
| Czech Republic | Smoking | -3.0 (-3.5 to -2.6) |
| Democratic People's Republic of Korea | Diet high in red meat | 1.6 (1.4 to 1.7) |
| Democratic People's Republic of Korea | High alcohol use | 1.0 (0.8 to 1.3) |
| Democratic People's Republic of Korea | High body-mass index | 0 (0 to 0) |
| Democratic People's Republic of Korea | High fasting plasma glucose | 2.4 (2.2 to 2.6) |
| Democratic People's Republic of Korea | Low physical activity | 1.7 (1.5 to 1.8) |
| Democratic People's Republic of Korea | Secondhand smoke | 1.2 (1.1 to 1.3) |
| Democratic People's Republic of Korea | Smoking | 1.8 (1.7 to 2.0) |
| Democratic Republic of the Congo | Diet high in red meat | -0.0 (-0.6 to 0.5) |
| Democratic Republic of the Congo | High alcohol use | 0.4 (-0.7 to 1.5) |
| Democratic Republic of the Congo | High body-mass index | 0 (0 to 0) |
| Democratic Republic of the Congo | High fasting plasma glucose | 0.9 (0.5 to 1.3) |
| Democratic Republic of the Congo | Low physical activity | 1.0 (0.7 to 1.3) |
| Democratic Republic of the Congo | Secondhand smoke | 0.3 (-0.1 to 0.7) |
| Democratic Republic of the Congo | Smoking | 0.3 (-0.1 to 0.6) |
| Denmark | Diet high in red meat | -3.3 (-3.4 to -3.2) |
| Denmark | High alcohol use | -3.9 (-4.1 to -3.8) |
| Denmark | High body-mass index | 0 (0 to 0) |
| Denmark | High fasting plasma glucose | -1.9 (-2.0 to -1.7) |
| Denmark | Low physical activity | -3.4 (-3.5 to -3.3) |
| Denmark | Secondhand smoke | -6.6 (-6.8 to -6.4) |
| Denmark | Smoking | -5.0 (-5.2 to -4.9) |
| Djibouti | Diet high in red meat | 1.6 (1.4 to 1.7) |
| Djibouti | High alcohol use | -3.4 (-3.8 to -2.9) |
| Djibouti | High body-mass index | 0 (0 to 0) |
| Djibouti | High fasting plasma glucose | 2.9 (2.8 to 3.1) |
| Djibouti | Low physical activity | 1.8 (1.7 to 2.0) |
| Djibouti | Secondhand smoke | 1.9 (1.8 to 2.1) |
| Djibouti | Smoking | 1.2 (1.0 to 1.3) |
| Dominica | Diet high in red meat | 1.7 (1.5 to 1.8) |
| Dominica | High alcohol use | 1.3 (1.0 to 1.6) |
| Dominica | High body-mass index | 0 (0 to 0) |
| Dominica | High fasting plasma glucose | 4.2 (3.9 to 4.5) |
| Dominica | Low physical activity | 1.7 (1.6 to 1.8) |
| Dominica | Secondhand smoke | 1.2 (1.1 to 1.4) |
| Dominica | Smoking | 0.8 (0.7 to 0.9) |
| Dominican Republic | Diet high in red meat | 1.5 (1.2 to 1.7) |
| Dominican Republic | High alcohol use | 1.2 (0.8 to 1.5) |
| Dominican Republic | High body-mass index | 0 (0 to 0) |
| Dominican Republic | High fasting plasma glucose | 4.4 (4.2 to 4.7) |
| Dominican Republic | Low physical activity | 1.6 (1.4 to 1.9) |
| Dominican Republic | Secondhand smoke | 0.5 (0.1 to 0.9) |
| Dominican Republic | Smoking | -0.1 (-0.6 to 0.4) |
| Ecuador | Diet high in red meat | 1.4 (1.2 to 1.7) |
| Ecuador | High alcohol use | 3.1 (2.5 to 3.8) |
| Ecuador | High body-mass index | 0 (0 to 0) |
| Ecuador | High fasting plasma glucose | 3.1 (2.9 to 3.3) |
| Ecuador | Low physical activity | 1.6 (1.4 to 1.8) |
| Ecuador | Secondhand smoke | -0.1 (-0.3 to 0.1) |
| Ecuador | Smoking | 0.1 (-0.2 to 0.4) |
| Egypt | Diet high in red meat | 1.1 (1.0 to 1.2) |
| Egypt | High alcohol use | 1.5 (1.3 to 1.7) |
| Egypt | High body-mass index | 0 (0 to 0) |
| Egypt | High fasting plasma glucose | 3.8 (3.7 to 3.9) |
| Egypt | Low physical activity | 0.6 (0.5 to 0.8) |
| Egypt | Secondhand smoke | 1.0 (0.9 to 1.2) |
| Egypt | Smoking | 0.7 (0.4 to 0.9) |
| El Salvador | Diet high in red meat | 2.4 (2.2 to 2.6) |
| El Salvador | High alcohol use | 2.1 (1.7 to 2.5) |
| El Salvador | High body-mass index | 0 (0 to 0) |
| El Salvador | High fasting plasma glucose | 4.0 (3.7 to 4.2) |
| El Salvador | Low physical activity | 2.2 (2.0 to 2.3) |
| El Salvador | Secondhand smoke | 2.7 (2.5 to 3.0) |
| El Salvador | Smoking | 2.4 (2.2 to 2.5) |
| Equatorial Guinea | Diet high in red meat | 1.7 (1.5 to 1.8) |
| Equatorial Guinea | High alcohol use | 3.1 (2.9 to 3.4) |
| Equatorial Guinea | High body-mass index | 0 (0 to 0) |
| Equatorial Guinea | High fasting plasma glucose | 5.9 (5.6 to 6.2) |
| Equatorial Guinea | Low physical activity | 1.8 (1.7 to 2.0) |
| Equatorial Guinea | Secondhand smoke | 1.6 (1.5 to 1.8) |
| Equatorial Guinea | Smoking | 1.4 (1.2 to 1.6) |
| Eritrea | Diet high in red meat | 1.3 (1.3 to 1.4) |
| Eritrea | High alcohol use | -0.5 (-0.8 to -0.1) |
| Eritrea | High body-mass index | 0 (0 to 0) |
| Eritrea | High fasting plasma glucose | 2.1 (2.1 to 2.2) |
| Eritrea | Low physical activity | 1.7 (1.5 to 1.9) |
| Eritrea | Secondhand smoke | 0.9 (0.8 to 1.0) |
| Eritrea | Smoking | 0.6 (0.4 to 0.8) |
| Estonia | Diet high in red meat | -2.5 (-2.8 to -2.1) |
| Estonia | High alcohol use | -1.3 (-1.7 to -0.8) |
| Estonia | High body-mass index | 0 (0 to 0) |
| Estonia | High fasting plasma glucose | -1.0 (-1.4 to -0.7) |
| Estonia | Low physical activity | -1.8 (-2.1 to -1.5) |
| Estonia | Secondhand smoke | -4.5 (-5.0 to -4.0) |
| Estonia | Smoking | -2.7 (-3.2 to -2.3) |
| Ethiopia | Diet high in red meat | -0.1 (-0.4 to 0.1) |
| Ethiopia | High alcohol use | 1.8 (1.2 to 2.4) |
| Ethiopia | High body-mass index | 0 (0 to 0) |
| Ethiopia | High fasting plasma glucose | -0.2 (-0.5 to 0.2) |
| Ethiopia | Low physical activity | 0.6 (0.3 to 0.9) |
| Ethiopia | Secondhand smoke | -1.0 (-1.3 to -0.7) |
| Ethiopia | Smoking | -0.1 (-0.5 to 0.2) |
| Federated States of Micronesia | Diet high in red meat | 1.4 (1.3 to 1.5) |
| Federated States of Micronesia | High alcohol use | -0.6 (-0.8 to -0.5) |
| Federated States of Micronesia | High body-mass index | 0 (0 to 0) |
| Federated States of Micronesia | High fasting plasma glucose | 1.5 (1.1 to 1.9) |
| Federated States of Micronesia | Low physical activity | 1.3 (1.2 to 1.4) |
| Federated States of Micronesia | Secondhand smoke | 1.7 (1.6 to 1.8) |
| Federated States of Micronesia | Smoking | 1.7 (1.6 to 1.9) |
| Fiji | Diet high in red meat | 1.0 (0.8 to 1.2) |
| Fiji | High alcohol use | 2.8 (2.3 to 3.3) |
| Fiji | High body-mass index | 0 (0 to 0) |
| Fiji | High fasting plasma glucose | 2.2 (2.1 to 2.4) |
| Fiji | Low physical activity | 0.9 (0.8 to 1.1) |
| Fiji | Secondhand smoke | 0.7 (0.5 to 1.0) |
| Fiji | Smoking | 0.6 (0.3 to 0.9) |
| Finland | Diet high in red meat | -2.8 (-3.0 to -2.6) |
| Finland | High alcohol use | -2.7 (-3.0 to -2.4) |
| Finland | High body-mass index | 0 (0 to 0) |
| Finland | High fasting plasma glucose | -1.4 (-1.7 to -1.2) |
| Finland | Low physical activity | -3.1 (-3.3 to -2.8) |
| Finland | Secondhand smoke | -4.8 (-5.1 to -4.5) |
| Finland | Smoking | -3.8 (-4.0 to -3.6) |
| France | Diet high in red meat | -1.2 (-1.4 to -0.9) |
| France | High alcohol use | -1.6 (-1.9 to -1.4) |
| France | High body-mass index | 0 (0 to 0) |
| France | High fasting plasma glucose | 0.2 (-0.0 to 0.5) |
| France | Low physical activity | -1.2 (-1.5 to -0.9) |
| France | Secondhand smoke | -2.5 (-2.7 to -2.3) |
| France | Smoking | -0.5 (-0.8 to -0.1) |
| Gabon | Diet high in red meat | 1.0 (0.7 to 1.2) |
| Gabon | High alcohol use | 0.3 (0.0 to 0.5) |
| Gabon | High body-mass index | 0 (0 to 0) |
| Gabon | High fasting plasma glucose | 3.6 (3.3 to 3.9) |
| Gabon | Low physical activity | 1.1 (0.9 to 1.3) |
| Gabon | Secondhand smoke | 1.1 (0.8 to 1.3) |
| Gabon | Smoking | 1.4 (1.2 to 1.6) |
| Georgia | Diet high in red meat | -0.8 (-1.2 to -0.5) |
| Georgia | High alcohol use | 1.6 (1.2 to 1.9) |
| Georgia | High body-mass index | 0 (0 to 0) |
| Georgia | High fasting plasma glucose | 1.4 (0.9 to 1.8) |
| Georgia | Low physical activity | -0.5 (-0.8 to -0.2) |
| Georgia | Secondhand smoke | -0.2 (-0.6 to 0.1) |
| Georgia | Smoking | 0.3 (-0.0 to 0.6) |
| Germany | Diet high in red meat | -1.5 (-1.6 to -1.4) |
| Germany | High alcohol use | -1.9 (-2.0 to -1.8) |
| Germany | High body-mass index | 0 (0 to 0) |
| Germany | High fasting plasma glucose | -0.3 (-0.4 to -0.2) |
| Germany | Low physical activity | -1.7 (-1.9 to -1.6) |
| Germany | Secondhand smoke | -2.5 (-2.6 to -2.4) |
| Germany | Smoking | -2.0 (-2.2 to -1.8) |
| Ghana | Diet high in red meat | 0.3 (0.2 to 0.4) |
| Ghana | High alcohol use | -0.3 (-0.5 to 0.0) |
| Ghana | High body-mass index | 0 (0 to 0) |
| Ghana | High fasting plasma glucose | 3.0 (2.9 to 3.1) |
| Ghana | Low physical activity | 0.4 (-0.0 to 0.9) |
| Ghana | Secondhand smoke | -0.3 (-0.5 to -0.2) |
| Ghana | Smoking | 0.5 (0.4 to 0.6) |
| Greece | Diet high in red meat | -0.5 (-0.7 to -0.3) |
| Greece | High alcohol use | -1.2 (-1.4 to -1.0) |
| Greece | High body-mass index | 0 (0 to 0) |
| Greece | High fasting plasma glucose | 0.2 (0.0 to 0.4) |
| Greece | Low physical activity | -0.6 (-0.9 to -0.3) |
| Greece | Secondhand smoke | -2.0 (-2.1 to -1.9) |
| Greece | Smoking | 0.2 (-0.0 to 0.5) |
| Greenland | Diet high in red meat | -1.5 (-2.0 to -1.1) |
| Greenland | High alcohol use | -1.4 (-1.7 to -1.1) |
| Greenland | High body-mass index | 0 (0 to 0) |
| Greenland | High fasting plasma glucose | 1.1 (0.7 to 1.5) |
| Greenland | Low physical activity | -1.3 (-1.8 to -0.9) |
| Greenland | Secondhand smoke | -2.2 (-2.7 to -1.7) |
| Greenland | Smoking | -1.6 (-2.2 to -1.0) |
| Grenada | Diet high in red meat | 1.2 (0.9 to 1.5) |
| Grenada | High alcohol use | 0.6 (0.4 to 0.9) |
| Grenada | High body-mass index | 0 (0 to 0) |
| Grenada | High fasting plasma glucose | 3.8 (3.4 to 4.2) |
| Grenada | Low physical activity | 1.1 (0.7 to 1.4) |
| Grenada | Secondhand smoke | 0.7 (0.4 to 1.0) |
| Grenada | Smoking | 0.3 (0.1 to 0.6) |
| Guam | Diet high in red meat | 2.2 (1.9 to 2.5) |
| Guam | High alcohol use | 6.0 (5.5 to 6.5) |
| Guam | High body-mass index | 0 (0 to 0) |
| Guam | High fasting plasma glucose | 3.7 (3.4 to 4.1) |
| Guam | Low physical activity | 2.4 (2.0 to 2.8) |
| Guam | Secondhand smoke | 1.3 (0.9 to 1.6) |
| Guam | Smoking | 2.6 (2.2 to 3.0) |
| Guatemala | Diet high in red meat | 1.7 (1.4 to 2.0) |
| Guatemala | High alcohol use | 0.4 (0.1 to 0.7) |
| Guatemala | High body-mass index | 0 (0 to 0) |
| Guatemala | High fasting plasma glucose | 3.0 (2.7 to 3.3) |
| Guatemala | Low physical activity | 2.3 (1.8 to 2.9) |
| Guatemala | Secondhand smoke | 1.5 (1.1 to 1.8) |
| Guatemala | Smoking | 0.6 (0.3 to 0.9) |
| Guinea | Diet high in red meat | 1.5 (1.4 to 1.5) |
| Guinea | High alcohol use | 0.9 (0.4 to 1.4) |
| Guinea | High body-mass index | 0 (0 to 0) |
| Guinea | High fasting plasma glucose | 1.7 (1.5 to 1.8) |
| Guinea | Low physical activity | 0.6 (0.4 to 0.8) |
| Guinea | Secondhand smoke | -0.2 (-0.3 to -0.1) |
| Guinea | Smoking | 0.3 (0.2 to 0.3) |
| Guinea-Bissau | Diet high in red meat | 0.9 (0.8 to 1.0) |
| Guinea-Bissau | High alcohol use | 1.3 (1.2 to 1.3) |
| Guinea-Bissau | High body-mass index | 0 (0 to 0) |
| Guinea-Bissau | High fasting plasma glucose | 1.8 (1.7 to 1.9) |
| Guinea-Bissau | Low physical activity | 0.9 (0.8 to 1.1) |
| Guinea-Bissau | Secondhand smoke | 1.8 (1.5 to 2.1) |
| Guinea-Bissau | Smoking | 1.2 (1.0 to 1.4) |
| Guyana | Diet high in red meat | 2.1 (1.7 to 2.6) |
| Guyana | High alcohol use | 1.1 (0.7 to 1.6) |
| Guyana | High body-mass index | 0 (0 to 0) |
| Guyana | High fasting plasma glucose | 4.0 (3.4 to 4.7) |
| Guyana | Low physical activity | 2.5 (2.0 to 3.1) |
| Guyana | Secondhand smoke | 1.4 (0.9 to 2.0) |
| Guyana | Smoking | 1.5 (1.0 to 2.1) |
| Haiti | Diet high in red meat | 0.7 (0.7 to 0.8) |
| Haiti | High alcohol use | 1.0 (0.9 to 1.1) |
| Haiti | High body-mass index | 0 (0 to 0) |
| Haiti | High fasting plasma glucose | 1.7 (1.6 to 1.7) |
| Haiti | Low physical activity | 0.9 (0.8 to 1.0) |
| Haiti | Secondhand smoke | -1.1 (-1.3 to -0.8) |
| Haiti | Smoking | -1.5 (-1.8 to -1.3) |
| Honduras | Diet high in red meat | 0.8 (0.6 to 0.9) |
| Honduras | High alcohol use | 0.9 (0.5 to 1.2) |
| Honduras | High body-mass index | 0 (0 to 0) |
| Honduras | High fasting plasma glucose | 2.2 (2.0 to 2.4) |
| Honduras | Low physical activity | 1.0 (0.9 to 1.2) |
| Honduras | Secondhand smoke | 0.3 (0.1 to 0.5) |
| Honduras | Smoking | -0.1 (-0.3 to 0.1) |
| Hungary | Diet high in red meat | -1.9 (-2.2 to -1.7) |
| Hungary | High alcohol use | -2.6 (-2.9 to -2.3) |
| Hungary | High body-mass index | 0 (0 to 0) |
| Hungary | High fasting plasma glucose | -1.1 (-1.5 to -0.8) |
| Hungary | Low physical activity | -1.3 (-1.5 to -1.0) |
| Hungary | Secondhand smoke | -2.8 (-3.1 to -2.6) |
| Hungary | Smoking | -3.3 (-3.7 to -3.0) |
| Iceland | Diet high in red meat | -1.6 (-1.8 to -1.3) |
| Iceland | High alcohol use | -0.5 (-0.7 to -0.2) |
| Iceland | High body-mass index | 0 (0 to 0) |
| Iceland | High fasting plasma glucose | -0.3 (-0.5 to -0.0) |
| Iceland | Low physical activity | -1.6 (-1.8 to -1.3) |
| Iceland | Secondhand smoke | -3.8 (-4.1 to -3.5) |
| Iceland | Smoking | -3.1 (-3.4 to -2.8) |
| India | Diet high in red meat | 1.3 (1.1 to 1.6) |
| India | High alcohol use | 2.5 (2.3 to 2.7) |
| India | High body-mass index | 0 (0 to 0) |
| India | High fasting plasma glucose | 2.4 (2.2 to 2.6) |
| India | Low physical activity | 0.6 (0.4 to 0.8) |
| India | Secondhand smoke | -0.4 (-0.5 to -0.3) |
| India | Smoking | -0.8 (-0.9 to -0.6) |
| Indonesia | Diet high in red meat | 1.8 (1.7 to 1.9) |
| Indonesia | High alcohol use | 0.8 (0.6 to 1.0) |
| Indonesia | High body-mass index | 0 (0 to 0) |
| Indonesia | High fasting plasma glucose | 3.0 (2.7 to 3.2) |
| Indonesia | Low physical activity | 1.8 (1.8 to 1.9) |
| Indonesia | Secondhand smoke | 1.6 (1.3 to 1.8) |
| Indonesia | Smoking | 2.1 (1.8 to 2.5) |
| Iraq | Diet high in red meat | 1.3 (1.0 to 1.5) |
| Iraq | High alcohol use | 0.3 (0.2 to 0.4) |
| Iraq | High body-mass index | 0 (0 to 0) |
| Iraq | High fasting plasma glucose | 3.5 (3.3 to 3.7) |
| Iraq | Low physical activity | 1.6 (1.5 to 1.7) |
| Iraq | Secondhand smoke | 1.1 (1.0 to 1.1) |
| Iraq | Smoking | 0.2 (0.1 to 0.4) |
| Ireland | Diet high in red meat | -1.5 (-1.7 to -1.3) |
| Ireland | High alcohol use | -1.8 (-2.0 to -1.7) |
| Ireland | High body-mass index | 0 (0 to 0) |
| Ireland | High fasting plasma glucose | 0.0 (-0.1 to 0.2) |
| Ireland | Low physical activity | -1.5 (-1.6 to -1.3) |
| Ireland | Secondhand smoke | -3.5 (-3.7 to -3.3) |
| Ireland | Smoking | -3.2 (-3.4 to -3.0) |
| Islamic Republic of Iran | Diet high in red meat | 2.6 (2.2 to 3.1) |
| Islamic Republic of Iran | High alcohol use | 30.8 (26.1 to 35.7) |
| Islamic Republic of Iran | High body-mass index | 0 (0 to 0) |
| Islamic Republic of Iran | High fasting plasma glucose | 4.7 (4.3 to 5.1) |
| Islamic Republic of Iran | Low physical activity | 2.8 (2.4 to 3.3) |
| Islamic Republic of Iran | Secondhand smoke | 3.4 (2.9 to 3.9) |
| Islamic Republic of Iran | Smoking | 2.8 (2.4 to 3.1) |
| Israel | Diet high in red meat | -2.2 (-2.4 to -2.0) |
| Israel | High alcohol use | -0.8 (-0.9 to -0.6) |
| Israel | High body-mass index | 0 (0 to 0) |
| Israel | High fasting plasma glucose | -1.2 (-1.4 to -0.9) |
| Israel | Low physical activity | -2.2 (-2.4 to -2.0) |
| Israel | Secondhand smoke | -3.6 (-3.8 to -3.4) |
| Israel | Smoking | -4.1 (-4.3 to -3.8) |
| Italy | Diet high in red meat | -1.2 (-1.3 to -1.0) |
| Italy | High alcohol use | -2.2 (-2.3 to -2.1) |
| Italy | High body-mass index | 0 (0 to 0) |
| Italy | High fasting plasma glucose | -0.6 (-0.7 to -0.5) |
| Italy | Low physical activity | -1.1 (-1.2 to -1.0) |
| Italy | Secondhand smoke | -2.4 (-2.6 to -2.3) |
| Italy | Smoking | -1.9 (-2.1 to -1.8) |
| Jamaica | Diet high in red meat | 2.7 (2.2 to 3.1) |
| Jamaica | High alcohol use | 2.9 (2.5 to 3.4) |
| Jamaica | High body-mass index | 0 (0 to 0) |
| Jamaica | High fasting plasma glucose | 4.4 (4.0 to 4.9) |
| Jamaica | Low physical activity | 2.8 (2.4 to 3.3) |
| Jamaica | Secondhand smoke | 1.1 (0.6 to 1.7) |
| Jamaica | Smoking | 1.1 (0.6 to 1.6) |
| Japan | Diet high in red meat | 0.1 (-0.0 to 0.3) |
| Japan | High alcohol use | -0.1 (-0.3 to 0.2) |
| Japan | High body-mass index | 0 (0 to 0) |
| Japan | High fasting plasma glucose | 0.1 (-0.2 to 0.3) |
| Japan | Low physical activity | 0.2 (0.0 to 0.3) |
| Japan | Secondhand smoke | -2.4 (-2.7 to -2.1) |
| Japan | Smoking | -0.3 (-0.7 to 0.0) |
| Jordan | Diet high in red meat | 0.9 (0.5 to 1.2) |
| Jordan | High alcohol use | 0.9 (0.2 to 1.5) |
| Jordan | High body-mass index | 0 (0 to 0) |
| Jordan | High fasting plasma glucose | 2.8 (2.5 to 3.2) |
| Jordan | Low physical activity | 0.8 (0.5 to 1.1) |
| Jordan | Secondhand smoke | 0.6 (0.3 to 0.9) |
| Jordan | Smoking | 1.1 (0.6 to 1.5) |
| Kazakhstan | Diet high in red meat | -1.6 (-2.1 to -1.2) |
| Kazakhstan | High alcohol use | -2.7 (-3.2 to -2.3) |
| Kazakhstan | High body-mass index | 0 (0 to 0) |
| Kazakhstan | High fasting plasma glucose | 0.2 (-0.3 to 0.8) |
| Kazakhstan | Low physical activity | -1.1 (-1.5 to -0.7) |
| Kazakhstan | Secondhand smoke | -2.2 (-2.6 to -1.7) |
| Kazakhstan | Smoking | -1.1 (-1.7 to -0.5) |
| Kenya | Diet high in red meat | 2.6 (2.5 to 2.7) |
| Kenya | High alcohol use | 1.8 (1.6 to 1.9) |
| Kenya | High body-mass index | 0 (0 to 0) |
| Kenya | High fasting plasma glucose | 4.0 (3.8 to 4.1) |
| Kenya | Low physical activity | 2.7 (2.6 to 2.7) |
| Kenya | Secondhand smoke | 0.6 (0.4 to 0.7) |
| Kenya | Smoking | 1.0 (0.7 to 1.2) |
| Kingdom of Eswatini | Diet high in red meat | 2.2 (1.7 to 2.6) |
| Kingdom of Eswatini | High alcohol use | 1.5 (1.1 to 2.0) |
| Kingdom of Eswatini | High body-mass index | 0 (0 to 0) |
| Kingdom of Eswatini | High fasting plasma glucose | 3.8 (3.3 to 4.3) |
| Kingdom of Eswatini | Low physical activity | 2.8 (2.4 to 3.3) |
| Kingdom of Eswatini | Secondhand smoke | 1.1 (0.6 to 1.5) |
| Kingdom of Eswatini | Smoking | 0.4 (0.0 to 0.9) |
| Kiribati | Diet high in red meat | 1.3 (1.2 to 1.4) |
| Kiribati | High alcohol use | -0.1 (-0.2 to 0.1) |
| Kiribati | High body-mass index | 0 (0 to 0) |
| Kiribati | High fasting plasma glucose | 1.6 (1.3 to 1.8) |
| Kiribati | Low physical activity | 1.3 (1.2 to 1.5) |
| Kiribati | Secondhand smoke | 1.4 (1.2 to 1.6) |
| Kiribati | Smoking | 1.1 (0.8 to 1.5) |
| Kuwait | Diet high in red meat | -0.6 (-1.4 to 0.3) |
| Kuwait | High alcohol use | 0 (0 to 0) |
| Kuwait | High body-mass index | 0 (0 to 0) |
| Kuwait | High fasting plasma glucose | 1.3 (0.5 to 2.1) |
| Kuwait | Low physical activity | -0.4 (-1.3 to 0.4) |
| Kuwait | Secondhand smoke | -0.9 (-1.7 to -0.1) |
| Kuwait | Smoking | -1.0 (-1.7 to -0.2) |
| Kyrgyzstan | Diet high in red meat | -1.5 (-1.7 to -1.3) |
| Kyrgyzstan | High alcohol use | -1.2 (-1.8 to -0.7) |
| Kyrgyzstan | High body-mass index | 0 (0 to 0) |
| Kyrgyzstan | High fasting plasma glucose | 0.1 (-0.2 to 0.4) |
| Kyrgyzstan | Low physical activity | -1.4 (-1.6 to -1.1) |
| Kyrgyzstan | Secondhand smoke | -1.1 (-1.3 to -0.9) |
| Kyrgyzstan | Smoking | 0.5 (0.2 to 0.8) |
| Lao People's Democratic Republic | Diet high in red meat | 1.3 (1.3 to 1.4) |
| Lao People's Democratic Republic | High alcohol use | 2.5 (2.3 to 2.7) |
| Lao People's Democratic Republic | High body-mass index | 0 (0 to 0) |
| Lao People's Democratic Republic | High fasting plasma glucose | 2.0 (1.9 to 2.1) |
| Lao People's Democratic Republic | Low physical activity | 1.4 (1.2 to 1.6) |
| Lao People's Democratic Republic | Secondhand smoke | 1.4 (1.4 to 1.5) |
| Lao People's Democratic Republic | Smoking | 1.9 (1.8 to 2.1) |
| Latvia | Diet high in red meat | -1.6 (-1.9 to -1.4) |
| Latvia | High alcohol use | -0.5 (-0.8 to -0.3) |
| Latvia | High body-mass index | 0 (0 to 0) |
| Latvia | High fasting plasma glucose | -0.4 (-0.7 to -0.2) |
| Latvia | Low physical activity | -1.5 (-1.7 to -1.2) |
| Latvia | Secondhand smoke | -2.4 (-2.6 to -2.2) |
| Latvia | Smoking | -1.2 (-1.4 to -1.0) |
| Lebanon | Diet high in red meat | 0.9 (0.7 to 1.2) |
| Lebanon | High alcohol use | -0.3 (-0.5 to -0.2) |
| Lebanon | High body-mass index | 0 (0 to 0) |
| Lebanon | High fasting plasma glucose | 2.7 (2.5 to 3.0) |
| Lebanon | Low physical activity | 0.9 (0.7 to 1.0) |
| Lebanon | Secondhand smoke | 1.4 (1.1 to 1.7) |
| Lebanon | Smoking | 1.7 (1.2 to 2.3) |
| Lesotho | Diet high in red meat | 3.2 (2.7 to 3.6) |
| Lesotho | High alcohol use | 3.1 (2.7 to 3.6) |
| Lesotho | High body-mass index | 0 (0 to 0) |
| Lesotho | High fasting plasma glucose | 5.5 (5.0 to 6.0) |
| Lesotho | Low physical activity | 2.5 (2.1 to 2.9) |
| Lesotho | Secondhand smoke | 4.2 (3.7 to 4.7) |
| Lesotho | Smoking | 2.7 (2.2 to 3.2) |
| Liberia | Diet high in red meat | 1.4 (1.0 to 1.8) |
| Liberia | High alcohol use | 1.4 (1.0 to 1.8) |
| Liberia | High body-mass index | 0 (0 to 0) |
| Liberia | High fasting plasma glucose | 3.4 (2.9 to 3.9) |
| Liberia | Low physical activity | 1.8 (1.4 to 2.1) |
| Liberia | Secondhand smoke | 0.9 (0.6 to 1.2) |
| Liberia | Smoking | 0.7 (0.5 to 0.9) |
| Libya | Diet high in red meat | 3.4 (3.2 to 3.6) |
| Libya | High alcohol use | 11.0 (8.4 to 13.7) |
| Libya | High body-mass index | 0 (0 to 0) |
| Libya | High fasting plasma glucose | 5.9 (5.6 to 6.2) |
| Libya | Low physical activity | 3.6 (3.4 to 3.7) |
| Libya | Secondhand smoke | 4.2 (3.9 to 4.4) |
| Libya | Smoking | 3.2 (3.0 to 3.5) |
| Lithuania | Diet high in red meat | -0.7 (-1.0 to -0.5) |
| Lithuania | High alcohol use | 0.2 (-0.3 to 0.7) |
| Lithuania | High body-mass index | 0 (0 to 0) |
| Lithuania | High fasting plasma glucose | -0.1 (-0.4 to 0.2) |
| Lithuania | Low physical activity | -0.1 (-0.4 to 0.1) |
| Lithuania | Secondhand smoke | -2.0 (-2.2 to -1.7) |
| Lithuania | Smoking | 0.6 (0.3 to 1.0) |
| Luxembourg | Diet high in red meat | -2.4 (-2.6 to -2.1) |
| Luxembourg | High alcohol use | -2.8 (-3.1 to -2.6) |
| Luxembourg | High body-mass index | 0 (0 to 0) |
| Luxembourg | High fasting plasma glucose | -0.8 (-1.0 to -0.5) |
| Luxembourg | Low physical activity | -2.6 (-2.8 to -2.3) |
| Luxembourg | Secondhand smoke | -3.9 (-4.1 to -3.6) |
| Luxembourg | Smoking | -4.2 (-4.5 to -3.9) |
| Madagascar | Diet high in red meat | 0.5 (0.3 to 0.7) |
| Madagascar | High alcohol use | -0.3 (-0.8 to 0.2) |
| Madagascar | High body-mass index | 0 (0 to 0) |
| Madagascar | High fasting plasma glucose | 1.5 (1.3 to 1.7) |
| Madagascar | Low physical activity | 0.7 (0.5 to 0.8) |
| Madagascar | Secondhand smoke | -1.1 (-1.4 to -0.8) |
| Madagascar | Smoking | -1.4 (-1.8 to -1.1) |
| Malawi | Diet high in red meat | 3.0 (2.8 to 3.3) |
| Malawi | High alcohol use | 2.6 (2.2 to 3.0) |
| Malawi | High body-mass index | 0 (0 to 0) |
| Malawi | High fasting plasma glucose | 2.6 (2.1 to 3.1) |
| Malawi | Low physical activity | 0.9 (0.4 to 1.4) |
| Malawi | Secondhand smoke | 1.3 (1.0 to 1.5) |
| Malawi | Smoking | 0.7 (0.5 to 0.8) |
| Malaysia | Diet high in red meat | 0.9 (0.7 to 1.1) |
| Malaysia | High alcohol use | -0.5 (-0.9 to -0.1) |
| Malaysia | High body-mass index | 0 (0 to 0) |
| Malaysia | High fasting plasma glucose | 2.2 (2.1 to 2.4) |
| Malaysia | Low physical activity | 1.9 (1.7 to 2.1) |
| Malaysia | Secondhand smoke | 0.6 (0.5 to 0.8) |
| Malaysia | Smoking | -0.3 (-0.5 to -0.1) |
| Maldives | Diet high in red meat | 3.7 (3.2 to 4.2) |
| Maldives | High alcohol use | -0.5 (-2.3 to 1.3) |
| Maldives | High body-mass index | 0 (0 to 0) |
| Maldives | High fasting plasma glucose | 1.5 (1.4 to 1.6) |
| Maldives | Low physical activity | 0.6 (0.5 to 0.7) |
| Maldives | Secondhand smoke | 0.7 (0.5 to 0.9) |
| Maldives | Smoking | -0.4 (-0.6 to -0.3) |
| Mali | Diet high in red meat | -0.3 (-0.4 to -0.2) |
| Mali | High alcohol use | -0.1 (-0.2 to -0.1) |
| Mali | High body-mass index | 0 (0 to 0) |
| Mali | High fasting plasma glucose | 0.8 (0.7 to 0.9) |
| Mali | Low physical activity | 0.0 (-0.1 to 0.2) |
| Mali | Secondhand smoke | 0.1 (-0.0 to 0.3) |
| Mali | Smoking | 0.2 (0.1 to 0.3) |
| Malta | Diet high in red meat | -1.4 (-1.7 to -1.1) |
| Malta | High alcohol use | -1.2 (-1.5 to -0.8) |
| Malta | High body-mass index | 0 (0 to 0) |
| Malta | High fasting plasma glucose | -0.3 (-0.6 to -0.0) |
| Malta | Low physical activity | -1.4 (-1.7 to -1.1) |
| Malta | Secondhand smoke | -3.3 (-3.7 to -2.9) |
| Malta | Smoking | -1.4 (-1.8 to -0.9) |
| Marshall Islands | Diet high in red meat | 2.2 (2.1 to 2.3) |
| Marshall Islands | High alcohol use | 3.3 (3.2 to 3.5) |
| Marshall Islands | High body-mass index | 0 (0 to 0) |
| Marshall Islands | High fasting plasma glucose | 2.1 (2.0 to 2.2) |
| Marshall Islands | Low physical activity | 2.2 (2.0 to 2.3) |
| Marshall Islands | Secondhand smoke | 2.2 (2.0 to 2.5) |
| Marshall Islands | Smoking | 2.7 (2.6 to 2.9) |
| Mauritania | Diet high in red meat | 1.0 (0.9 to 1.1) |
| Mauritania | High alcohol use | 0 (0 to 0) |
| Mauritania | High body-mass index | 0 (0 to 0) |
| Mauritania | High fasting plasma glucose | 2.6 (2.4 to 2.8) |
| Mauritania | Low physical activity | 1.3 (1.2 to 1.5) |
| Mauritania | Secondhand smoke | 0.2 (0.0 to 0.3) |
| Mauritania | Smoking | 0.5 (0.3 to 0.7) |
| Mauritius | Diet high in red meat | 2.3 (1.8 to 2.7) |
| Mauritius | High alcohol use | 0.9 (0.1 to 1.7) |
| Mauritius | High body-mass index | 0 (0 to 0) |
| Mauritius | High fasting plasma glucose | 3.6 (3.0 to 4.1) |
| Mauritius | Low physical activity | 2.7 (2.3 to 3.2) |
| Mauritius | Secondhand smoke | 2.0 (1.6 to 2.4) |
| Mauritius | Smoking | 2.0 (1.6 to 2.4) |
| Mexico | Diet high in red meat | 1.0 (0.9 to 1.1) |
| Mexico | High alcohol use | 0.7 (0.5 to 0.9) |
| Mexico | High body-mass index | 0 (0 to 0) |
| Mexico | High fasting plasma glucose | 2.0 (1.8 to 2.1) |
| Mexico | Low physical activity | 1.6 (1.3 to 1.9) |
| Mexico | Secondhand smoke | -1.3 (-1.6 to -1.1) |
| Mexico | Smoking | -2.4 (-2.6 to -2.1) |
| Mongolia | Diet high in red meat | 1.5 (1.3 to 1.7) |
| Mongolia | High alcohol use | 4.7 (4.4 to 5.0) |
| Mongolia | High body-mass index | 0 (0 to 0) |
| Mongolia | High fasting plasma glucose | 3.8 (3.6 to 3.9) |
| Mongolia | Low physical activity | 1.1 (0.9 to 1.3) |
| Mongolia | Secondhand smoke | 1.7 (1.6 to 1.9) |
| Mongolia | Smoking | 3.7 (3.5 to 3.9) |
| Montenegro | Diet high in red meat | 0.3 (-0.1 to 0.7) |
| Montenegro | High alcohol use | -0.1 (-0.5 to 0.4) |
| Montenegro | High body-mass index | 0 (0 to 0) |
| Montenegro | High fasting plasma glucose | 1.7 (1.4 to 2.0) |
| Montenegro | Low physical activity | 0.5 (0.1 to 1.0) |
| Montenegro | Secondhand smoke | -0.2 (-0.8 to 0.3) |
| Montenegro | Smoking | 0.8 (0.2 to 1.3) |
| Morocco | Diet high in red meat | 2.9 (2.8 to 3.0) |
| Morocco | High alcohol use | 0.1 (-0.4 to 0.6) |
| Morocco | High body-mass index | 0 (0 to 0) |
| Morocco | High fasting plasma glucose | 5.7 (5.5 to 5.9) |
| Morocco | Low physical activity | 3.0 (2.8 to 3.1) |
| Morocco | Secondhand smoke | 1.8 (1.7 to 1.8) |
| Morocco | Smoking | 1.0 (0.9 to 1.1) |
| Mozambique | Diet high in red meat | 1.8 (1.7 to 1.8) |
| Mozambique | High alcohol use | 4.2 (3.9 to 4.4) |
| Mozambique | High body-mass index | 0 (0 to 0) |
| Mozambique | High fasting plasma glucose | 2.5 (2.2 to 2.8) |
| Mozambique | Low physical activity | 1.3 (1.1 to 1.5) |
| Mozambique | Secondhand smoke | 0.7 (0.5 to 0.9) |
| Mozambique | Smoking | 0.7 (0.5 to 0.9) |
| Myanmar | Diet high in red meat | 1.7 (1.3 to 2.1) |
| Myanmar | High alcohol use | 8.4 (8.1 to 8.7) |
| Myanmar | High body-mass index | 0 (0 to 0) |
| Myanmar | High fasting plasma glucose | 1.4 (1.2 to 1.6) |
| Myanmar | Low physical activity | 0.9 (0.6 to 1.2) |
| Myanmar | Secondhand smoke | -1.2 (-1.4 to -1.1) |
| Myanmar | Smoking | -3.2 (-3.7 to -2.8) |
| Namibia | Diet high in red meat | 2.4 (2.3 to 2.5) |
| Namibia | High alcohol use | 3.2 (3.0 to 3.3) |
| Namibia | High body-mass index | 0 (0 to 0) |
| Namibia | High fasting plasma glucose | 3.6 (3.5 to 3.7) |
| Namibia | Low physical activity | 2.7 (2.6 to 2.8) |
| Namibia | Secondhand smoke | 1.3 (1.2 to 1.4) |
| Namibia | Smoking | -0.1 (-0.4 to 0.2) |
| Nepal | Diet high in red meat | 0.7 (0.5 to 1.0) |
| Nepal | High alcohol use | 7.6 (7.0 to 8.2) |
| Nepal | High body-mass index | 0 (0 to 0) |
| Nepal | High fasting plasma glucose | 2.3 (1.9 to 2.7) |
| Nepal | Low physical activity | 1.1 (0.6 to 1.5) |
| Nepal | Secondhand smoke | -1.0 (-1.1 to -0.8) |
| Nepal | Smoking | -3.1 (-3.3 to -2.8) |
| Netherlands | Diet high in red meat | -2.1 (-2.4 to -1.8) |
| Netherlands | High alcohol use | -2.5 (-2.8 to -2.1) |
| Netherlands | High body-mass index | 0 (0 to 0) |
| Netherlands | High fasting plasma glucose | -0.5 (-0.8 to -0.2) |
| Netherlands | Low physical activity | -2.4 (-2.6 to -2.2) |
| Netherlands | Secondhand smoke | -3.4 (-3.8 to -3.0) |
| Netherlands | Smoking | -4.3 (-4.8 to -3.9) |
| New Zealand | Diet high in red meat | -1.4 (-1.6 to -1.2) |
| New Zealand | High alcohol use | -1.7 (-1.8 to -1.5) |
| New Zealand | High body-mass index | 0 (0 to 0) |
| New Zealand | High fasting plasma glucose | 0.4 (0.2 to 0.5) |
| New Zealand | Low physical activity | 0.1 (-0.1 to 0.3) |
| New Zealand | Secondhand smoke | -2.6 (-2.9 to -2.4) |
| New Zealand | Smoking | -2.6 (-2.9 to -2.3) |
| Nicaragua | Diet high in red meat | 1.3 (1.2 to 1.5) |
| Nicaragua | High alcohol use | 2.4 (2.1 to 2.7) |
| Nicaragua | High body-mass index | 0 (0 to 0) |
| Nicaragua | High fasting plasma glucose | 2.7 (2.5 to 2.9) |
| Nicaragua | Low physical activity | 1.8 (1.6 to 1.9) |
| Nicaragua | Secondhand smoke | 1.1 (0.9 to 1.2) |
| Nicaragua | Smoking | 1.3 (1.2 to 1.5) |
| Niger | Diet high in red meat | -0.3 (-0.4 to -0.2) |
| Niger | High alcohol use | 2.7 (2.0 to 3.3) |
| Niger | High body-mass index | 0 (0 to 0) |
| Niger | High fasting plasma glucose | 0.3 (0.2 to 0.4) |
| Niger | Low physical activity | -0.2 (-0.3 to -0.1) |
| Niger | Secondhand smoke | -1.0 (-1.2 to -0.9) |
| Niger | Smoking | -0.7 (-0.9 to -0.6) |
| Nigeria | Diet high in red meat | 1.7 (1.5 to 1.8) |
| Nigeria | High alcohol use | 1.4 (1.3 to 1.5) |
| Nigeria | High body-mass index | 0 (0 to 0) |
| Nigeria | High fasting plasma glucose | 2.3 (2.2 to 2.4) |
| Nigeria | Low physical activity | 1.5 (1.4 to 1.7) |
| Nigeria | Secondhand smoke | 0.0 (-0.0 to 0.1) |
| Nigeria | Smoking | 0.0 (-0.0 to 0.1) |
| North Macedonia | Diet high in red meat | -1.1 (-1.4 to -0.9) |
| North Macedonia | High alcohol use | -2.4 (-2.8 to -2.0) |
| North Macedonia | High body-mass index | 0 (0 to 0) |
| North Macedonia | High fasting plasma glucose | 0.6 (0.3 to 0.9) |
| North Macedonia | Low physical activity | -0.9 (-1.2 to -0.7) |
| North Macedonia | Secondhand smoke | -1.4 (-1.7 to -1.1) |
| North Macedonia | Smoking | -0.7 (-0.9 to -0.4) |
| Northern Mariana Islands | Diet high in red meat | 1.6 (1.2 to 2.1) |
| Northern Mariana Islands | High alcohol use | 2.2 (2.0 to 2.4) |
| Northern Mariana Islands | High body-mass index | 0 (0 to 0) |
| Northern Mariana Islands | High fasting plasma glucose | 1.8 (1.3 to 2.3) |
| Northern Mariana Islands | Low physical activity | 1.6 (1.1 to 2.0) |
| Northern Mariana Islands | Secondhand smoke | 0.9 (0.4 to 1.3) |
| Northern Mariana Islands | Smoking | 1.8 (1.2 to 2.4) |
| Norway | Diet high in red meat | -2.7 (-3.0 to -2.5) |
| Norway | High alcohol use | -2.3 (-2.7 to -2.0) |
| Norway | High body-mass index | 0 (0 to 0) |
| Norway | High fasting plasma glucose | -1.9 (-2.2 to -1.7) |
| Norway | Low physical activity | -2.7 (-2.9 to -2.4) |
| Norway | Secondhand smoke | -5.7 (-6.0 to -5.3) |
| Norway | Smoking | -5.1 (-5.5 to -4.8) |
| Oman | Diet high in red meat | 0.7 (0.5 to 0.8) |
| Oman | High alcohol use | -0.0 (-1.1 to 1.1) |
| Oman | High body-mass index | 0 (0 to 0) |
| Oman | High fasting plasma glucose | 3.2 (3.1 to 3.4) |
| Oman | Low physical activity | 0.7 (0.6 to 0.9) |
| Oman | Secondhand smoke | 0.7 (0.4 to 1.0) |
| Oman | Smoking | 0.1 (0.0 to 0.2) |
| Pakistan | Diet high in red meat | 1.1 (0.9 to 1.3) |
| Pakistan | High alcohol use | 3.8 (3.6 to 4.0) |
| Pakistan | High body-mass index | 0 (0 to 0) |
| Pakistan | High fasting plasma glucose | 2.6 (2.5 to 2.8) |
| Pakistan | Low physical activity | 1.0 (0.9 to 1.2) |
| Pakistan | Secondhand smoke | -0.5 (-0.9 to -0.2) |
| Pakistan | Smoking | -1.2 (-1.5 to -0.8) |
| Palestine | Diet high in red meat | 0.3 (0.3 to 0.4) |
| Palestine | High alcohol use | -0.4 (-0.6 to -0.3) |
| Palestine | High body-mass index | 0 (0 to 0) |
| Palestine | High fasting plasma glucose | 2.1 (1.9 to 2.2) |
| Palestine | Low physical activity | 0.7 (0.6 to 0.8) |
| Palestine | Secondhand smoke | 0.4 (0.4 to 0.5) |
| Palestine | Smoking | 0.1 (-0.0 to 0.1) |
| Panama | Diet high in red meat | 2.2 (2.0 to 2.4) |
| Panama | High alcohol use | 2.6 (2.3 to 2.8) |
| Panama | High body-mass index | 0 (0 to 0) |
| Panama | High fasting plasma glucose | 3.8 (3.6 to 4.0) |
| Panama | Low physical activity | 2.3 (2.1 to 2.5) |
| Panama | Secondhand smoke | -0.2 (-0.5 to 0.0) |
| Panama | Smoking | 0.8 (0.6 to 1.0) |
| Papua New Guinea | Diet high in red meat | 0.8 (0.6 to 1.0) |
| Papua New Guinea | High alcohol use | 0.5 (-0.0 to 1.0) |
| Papua New Guinea | High body-mass index | 0 (0 to 0) |
| Papua New Guinea | High fasting plasma glucose | 1.4 (1.2 to 1.5) |
| Papua New Guinea | Low physical activity | 0.8 (0.7 to 1.0) |
| Papua New Guinea | Secondhand smoke | 1.1 (0.9 to 1.3) |
| Papua New Guinea | Smoking | 0.2 (0.0 to 0.4) |
| Paraguay | Diet high in red meat | 0.9 (0.7 to 1.0) |
| Paraguay | High alcohol use | -0.2 (-0.4 to -0.0) |
| Paraguay | High body-mass index | 0 (0 to 0) |
| Paraguay | High fasting plasma glucose | 2.5 (2.3 to 2.7) |
| Paraguay | Low physical activity | 1.1 (1.0 to 1.2) |
| Paraguay | Secondhand smoke | -0.7 (-0.9 to -0.5) |
| Paraguay | Smoking | -1.1 (-1.3 to -0.8) |
| Peru | Diet high in red meat | -0.1 (-0.3 to 0.1) |
| Peru | High alcohol use | 0.8 (0.6 to 1.1) |
| Peru | High body-mass index | 0 (0 to 0) |
| Peru | High fasting plasma glucose | 1.7 (1.4 to 2.0) |
| Peru | Low physical activity | -0.0 (-0.3 to 0.2) |
| Peru | Secondhand smoke | -2.6 (-3.0 to -2.1) |
| Peru | Smoking | -0.8 (-1.1 to -0.4) |
| Philippines | Diet high in red meat | 1.6 (1.5 to 1.6) |
| Philippines | High alcohol use | 1.7 (1.6 to 1.7) |
| Philippines | High body-mass index | 0 (0 to 0) |
| Philippines | High fasting plasma glucose | 2.3 (2.2 to 2.3) |
| Philippines | Low physical activity | 2.0 (1.8 to 2.2) |
| Philippines | Secondhand smoke | 0.6 (0.5 to 0.7) |
| Philippines | Smoking | -0.6 (-0.8 to -0.4) |
| Plurinational State of Bolivia | Diet high in red meat | 0.3 (0.1 to 0.4) |
| Plurinational State of Bolivia | High alcohol use | 1.1 (0.9 to 1.2) |
| Plurinational State of Bolivia | High body-mass index | 0 (0 to 0) |
| Plurinational State of Bolivia | High fasting plasma glucose | 2.6 (2.5 to 2.7) |
| Plurinational State of Bolivia | Low physical activity | 0.5 (0.4 to 0.6) |
| Plurinational State of Bolivia | Secondhand smoke | 0.2 (-0.1 to 0.5) |
| Plurinational State of Bolivia | Smoking | 0.1 (-0.2 to 0.4) |
| Poland | Diet high in red meat | -1.5 (-1.8 to -1.2) |
| Poland | High alcohol use | -0.5 (-0.7 to -0.3) |
| Poland | High body-mass index | 0 (0 to 0) |
| Poland | High fasting plasma glucose | -0.9 (-1.3 to -0.5) |
| Poland | Low physical activity | -1.2 (-1.5 to -0.9) |
| Poland | Secondhand smoke | -3.0 (-3.3 to -2.7) |
| Poland | Smoking | -2.4 (-2.6 to -2.2) |
| Portugal | Diet high in red meat | -1.0 (-1.2 to -0.8) |
| Portugal | High alcohol use | -1.3 (-1.5 to -1.1) |
| Portugal | High body-mass index | 0 (0 to 0) |
| Portugal | High fasting plasma glucose | -0.1 (-0.3 to 0.2) |
| Portugal | Low physical activity | -0.6 (-0.8 to -0.4) |
| Portugal | Secondhand smoke | -2.2 (-2.4 to -2.0) |
| Portugal | Smoking | 1.3 (1.0 to 1.6) |
| Principality of Monaco | Diet high in red meat | 0.4 (0.2 to 0.7) |
| Principality of Monaco | High alcohol use | 0.5 (0.2 to 0.7) |
| Principality of Monaco | High body-mass index | 0 (0 to 0) |
| Principality of Monaco | High fasting plasma glucose | 1.5 (1.2 to 1.8) |
| Principality of Monaco | Low physical activity | 0.5 (0.2 to 0.7) |
| Principality of Monaco | Secondhand smoke | -0.9 (-1.1 to -0.7) |
| Principality of Monaco | Smoking | -0.2 (-0.4 to 0.1) |
| Puerto Rico | Diet high in red meat | -0.8 (-1.1 to -0.5) |
| Puerto Rico | High alcohol use | -0.4 (-0.7 to -0.1) |
| Puerto Rico | High body-mass index | 0 (0 to 0) |
| Puerto Rico | High fasting plasma glucose | 0.9 (0.6 to 1.1) |
| Puerto Rico | Low physical activity | -0.8 (-1.1 to -0.6) |
| Puerto Rico | Secondhand smoke | -1.7 (-2.0 to -1.4) |
| Puerto Rico | Smoking | -1.4 (-1.7 to -1.2) |
| Qatar | Diet high in red meat | -0.9 (-1.4 to -0.5) |
| Qatar | High alcohol use | -1.8 (-2.1 to -1.5) |
| Qatar | High body-mass index | 0 (0 to 0) |
| Qatar | High fasting plasma glucose | 0.8 (0.4 to 1.1) |
| Qatar | Low physical activity | -0.9 (-1.3 to -0.5) |
| Qatar | Secondhand smoke | -0.7 (-1.2 to -0.2) |
| Qatar | Smoking | -1.2 (-1.6 to -0.9) |
| Republic of Cabo Verde | Diet high in red meat | -0.1 (-0.3 to 0.1) |
| Republic of Cabo Verde | High alcohol use | 0.2 (0.0 to 0.3) |
| Republic of Cabo Verde | High body-mass index | 0 (0 to 0) |
| Republic of Cabo Verde | High fasting plasma glucose | 2.0 (1.8 to 2.1) |
| Republic of Cabo Verde | Low physical activity | 0.2 (0.0 to 0.5) |
| Republic of Cabo Verde | Secondhand smoke | -0.7 (-1.0 to -0.4) |
| Republic of Cabo Verde | Smoking | -1.5 (-1.6 to -1.3) |
| Republic of C么te d'Ivoire | Diet high in red meat | 1.7 (1.5 to 1.8) |
| Republic of C么te d'Ivoire | High alcohol use | 1.6 (1.4 to 1.8) |
| Republic of C么te d'Ivoire | High body-mass index | 0 (0 to 0) |
| Republic of C么te d'Ivoire | High fasting plasma glucose | 3.0 (2.9 to 3.2) |
| Republic of C么te d'Ivoire | Low physical activity | 2.1 (1.9 to 2.3) |
| Republic of C么te d'Ivoire | Secondhand smoke | 1.1 (0.8 to 1.3) |
| Republic of C么te d'Ivoire | Smoking | 0.2 (-0.1 to 0.4) |
| Republic of Korea | Diet high in red meat | 1.7 (1.5 to 2.0) |
| Republic of Korea | High alcohol use | 1.5 (1.2 to 1.8) |
| Republic of Korea | High body-mass index | 0 (0 to 0) |
| Republic of Korea | High fasting plasma glucose | 3.0 (2.9 to 3.1) |
| Republic of Korea | Low physical activity | 2.0 (1.7 to 2.2) |
| Republic of Korea | Secondhand smoke | -0.1 (-0.4 to 0.1) |
| Republic of Korea | Smoking | 1.0 (0.8 to 1.3) |
| Republic of Moldova | Diet high in red meat | -1.6 (-1.9 to -1.3) |
| Republic of Moldova | High alcohol use | -2.0 (-2.4 to -1.7) |
| Republic of Moldova | High body-mass index | 0 (0 to 0) |
| Republic of Moldova | High fasting plasma glucose | -0.0 (-0.3 to 0.3) |
| Republic of Moldova | Low physical activity | -1.4 (-1.7 to -1.1) |
| Republic of Moldova | Secondhand smoke | -1.6 (-1.9 to -1.3) |
| Republic of Moldova | Smoking | -0.9 (-1.2 to -0.5) |
| Republic of Nauru | Diet high in red meat | 0.7 (0.5 to 0.8) |
| Republic of Nauru | High alcohol use | 1.8 (1.7 to 1.9) |
| Republic of Nauru | High body-mass index | 0 (0 to 0) |
| Republic of Nauru | High fasting plasma glucose | 0.0 (-0.2 to 0.3) |
| Republic of Nauru | Low physical activity | 0.6 (0.4 to 0.7) |
| Republic of Nauru | Secondhand smoke | 0.6 (0.3 to 0.8) |
| Republic of Nauru | Smoking | 0.2 (-0.1 to 0.5) |
| Republic of Niue | Diet high in red meat | 0.8 (0.7 to 0.9) |
| Republic of Niue | High alcohol use | 1.2 (0.8 to 1.7) |
| Republic of Niue | High body-mass index | 0 (0 to 0) |
| Republic of Niue | High fasting plasma glucose | 1.2 (1.0 to 1.4) |
| Republic of Niue | Low physical activity | 0.6 (0.5 to 0.7) |
| Republic of Niue | Secondhand smoke | 0.6 (0.4 to 0.7) |
| Republic of Niue | Smoking | 0.4 (0.3 to 0.6) |
| Republic of Palau | Diet high in red meat | 0.9 (0.8 to 1.0) |
| Republic of Palau | High alcohol use | 1.7 (1.6 to 1.9) |
| Republic of Palau | High body-mass index | 0 (0 to 0) |
| Republic of Palau | High fasting plasma glucose | 1.3 (1.0 to 1.5) |
| Republic of Palau | Low physical activity | 0.8 (0.7 to 0.9) |
| Republic of Palau | Secondhand smoke | 0.6 (0.4 to 0.7) |
| Republic of Palau | Smoking | 0.4 (0.3 to 0.6) |
| Republic of San Marino | Diet high in red meat | 0.6 (0.2 to 1.0) |
| Republic of San Marino | High alcohol use | 0.5 (0.1 to 1.0) |
| Republic of San Marino | High body-mass index | 0 (0 to 0) |
| Republic of San Marino | High fasting plasma glucose | 1.8 (1.3 to 2.3) |
| Republic of San Marino | Low physical activity | 0.9 (0.4 to 1.3) |
| Republic of San Marino | Secondhand smoke | -1.3 (-1.6 to -1.0) |
| Republic of San Marino | Smoking | -0.4 (-0.8 to -0.0) |
| Republic of the Gambia | Diet high in red meat | 1.3 (1.0 to 1.7) |
| Republic of the Gambia | High alcohol use | 3.3 (2.7 to 3.8) |
| Republic of the Gambia | High body-mass index | 0 (0 to 0) |
| Republic of the Gambia | High fasting plasma glucose | 3.1 (2.7 to 3.4) |
| Republic of the Gambia | Low physical activity | 1.7 (1.4 to 2.0) |
| Republic of the Gambia | Secondhand smoke | 0.3 (-0.1 to 0.6) |
| Republic of the Gambia | Smoking | 0.4 (0.0 to 0.7) |
| Romania | Diet high in red meat | -0.3 (-0.6 to -0.0) |
| Romania | High alcohol use | 0.1 (-0.1 to 0.4) |
| Romania | High body-mass index | 0 (0 to 0) |
| Romania | High fasting plasma glucose | 2.0 (1.7 to 2.3) |
| Romania | Low physical activity | -0.1 (-0.4 to 0.2) |
| Romania | Secondhand smoke | -0.8 (-1.1 to -0.6) |
| Romania | Smoking | 0.4 (0.0 to 0.7) |
| Russian Federation | Diet high in red meat | -0.9 (-1.3 to -0.6) |
| Russian Federation | High alcohol use | -1.2 (-1.7 to -0.8) |
| Russian Federation | High body-mass index | 0 (0 to 0) |
| Russian Federation | High fasting plasma glucose | 0.2 (-0.2 to 0.6) |
| Russian Federation | Low physical activity | -0.8 (-1.1 to -0.4) |
| Russian Federation | Secondhand smoke | -2.0 (-2.5 to -1.5) |
| Russian Federation | Smoking | 1.8 (1.5 to 2.2) |
| Rwanda | Diet high in red meat | 0.3 (-0.0 to 0.7) |
| Rwanda | High alcohol use | -1.7 (-2.1 to -1.3) |
| Rwanda | High body-mass index | 0 (0 to 0) |
| Rwanda | High fasting plasma glucose | -0.7 (-1.1 to -0.3) |
| Rwanda | Low physical activity | -0.8 (-1.2 to -0.4) |
| Rwanda | Secondhand smoke | -1.0 (-1.4 to -0.5) |
| Rwanda | Smoking | -1.5 (-1.9 to -1.2) |
| Saint Kitts and Nevis | Diet high in red meat | -1.6 (-1.9 to -1.3) |
| Saint Kitts and Nevis | High alcohol use | -3.1 (-3.5 to -2.7) |
| Saint Kitts and Nevis | High body-mass index | 0 (0 to 0) |
| Saint Kitts and Nevis | High fasting plasma glucose | 0.6 (0.4 to 0.8) |
| Saint Kitts and Nevis | Low physical activity | -1.3 (-1.5 to -1.0) |
| Saint Kitts and Nevis | Secondhand smoke | -1.9 (-2.0 to -1.7) |
| Saint Kitts and Nevis | Smoking | -2.0 (-2.1 to -1.9) |
| Saint Lucia | Diet high in red meat | 1.4 (1.1 to 1.7) |
| Saint Lucia | High alcohol use | 1.2 (0.9 to 1.4) |
| Saint Lucia | High body-mass index | 0 (0 to 0) |
| Saint Lucia | High fasting plasma glucose | 4.0 (3.6 to 4.4) |
| Saint Lucia | Low physical activity | 1.6 (1.2 to 1.9) |
[truncated: 81,881 more chars]
